# Supplementary material for: Chiral dihydroxytetraphenylene-catalyzed enantioselective conjugate addition of boronic acids to β-enaminones
Source: Royal Society of Chemistry journal article supplement (doi:10.1039/d1qo01845k), 2022-01-01
Supplement: d1qo01845k1.pdf [file d1qo01845k1.pdf]

*Electronic Supplementary Information for*

**Chiral dihydroxytetraphenylene-catalyzed enantioselective conjugate  
addition of boronic acids to  $\beta$ -enaminones**

En-Ze Yao, Guo-Li Chai,\* Ping Zhang, Bo Zhu, Junbiao Chang\*

*NMPA Key Laboratory for Research and Evaluation of Innovative Drug, Henan Key  
Laboratory of Organic Functional Molecules and Drug Innovation, School of  
Chemistry and Chemical Engineering, Henan Normal University, Xinxiang, Henan  
453007, China*

E-mail: [guolichai@126.com](mailto:guolichai@126.com); [changjunbiao@zzu.edu.cn](mailto:changjunbiao@zzu.edu.cn)

**Contents:**

|                                                                                                                 |     |
|-----------------------------------------------------------------------------------------------------------------|-----|
| 1. General information .....                                                                                    | S2  |
| 2. Preparation of starting materials .....                                                                      | S2  |
| 3. General procedures for the preparation of racemic products.....                                              | S10 |
| 4. General procedures for the enantioselective conjugate addition of boronic acids to $\beta$ -aminoenones..... | S10 |
| 5. Large-scale reaction and synthetic transformations of products.....                                          | S28 |
| 6. References .....                                                                                             | S33 |
| 7. X-ray crystallography data .....                                                                             | S33 |
| 8. Copies of $^1\text{H}$ , $^{13}\text{C}$ , and $^{19}\text{F}$ NMR spectra.....                              | S35 |
| 9. HPLC traces of optically active compounds .....                                                              | S95 |

## 1. General information

All reactions were carried out under an atmosphere of nitrogen using standard Schlenk techniques. All solvents and reagents were obtained from commercial sources and purified according to established procedures before use. Flash chromatography (FC) was carried out using silica gel (300-400 mesh). HPLC analysis was performed on a Dionex UltiMate 3000, ThermoScientific. Chiral HPLC data for the products could be obtained using a Chiralcel OD-H, Chiralpak IG column. These chiral columns were purchased from Daicel Chemical Industries Ltd. Optical rotations were measured on an Insmark polarimeter (IP-digi 300).  $^1\text{H}$  NMR spectra were measured on a 400 MHz (Bruker, AVANCE NEO) or a 600 MHz spectrometer (Bruker, AVANCE III HD). Chemical shifts are reported in ppm from tetramethylsilane with the solvent resonance as the internal standard ( $\text{CDCl}_3$ ,  $\delta = 7.26$ ). Data are presented as follows: chemical shift (ppm), multiplicity (s = singlet, d = doublet, t = triplet, q = quartet, m = multiplet, brs = broad singlet), coupling constants in hertz (Hz), integration.  $^{13}\text{C}$  NMR spectra were measured at 100 MHz (Bruker, AVANCE NEO) or 150 MHz (Bruker, AVANCE III HD). Chemical shifts are reported in ppm from tetramethylsilane with the solvent resonance as the internal standard ( $\text{CDCl}_3$ ,  $\delta = 77.16$ ). High-resolution mass spectra (HRMS) were recorded with a Bruker (Compact) mass spectrometer. All melting points were determined using a digital melting point apparatus (Shanghai INESA Physico-Optical Instrument Co., Ltd. SGW® X-4B) and were uncorrected. TLC was performed on glass-backed silica gel plate. Chiral ligand (*S*)-2,15-dichlorotetraphenylene-1,16-diol **L1** [(*S*)-2,15- $\text{Cl}_2$ -DHTP], (*S*)-2,15-dibromotetraphenylene-1,16-diol **L2** [(*S*)-2,15- $\text{Br}_2$ -DHTP], (*S*)-1,16-dihydroxytetraphenylene **L3** [(*S*)-DHTP], and (*S,S*)-1,8,9,16-tetrahydroxytetraphenylene **L4** [(*S,S*)-THTP] were prepared according to the procedure previously reported.<sup>1</sup> (*R*)-BINOL **L5**, (*R*)-3,3'- $\text{Br}_2$ -BINOL **L7**, (*R*)-3,3'- $\text{I}_2$ -BINOL **L8**, (*R*)-3,3'- $\text{Me}_2$ -BINOL **L9**, (*R*)-3,3'- $\text{Ph}_2$ -BINOL **L10**, and **L11** bearing two 3,5-*bis*(trifluoromethyl)phenyl groups were purchased from Daicel Chemical Industries Ltd. (*R*)-3,3'- $\text{Cl}_2$ -BINOL **L6** was prepared according to those reported in the literature.<sup>2</sup>

## 2. Preparation of starting materials

*N*-Phthaloyl- $\beta$ -enaminone **1a-1t** were synthesized according to the literature procedures.<sup>3</sup>

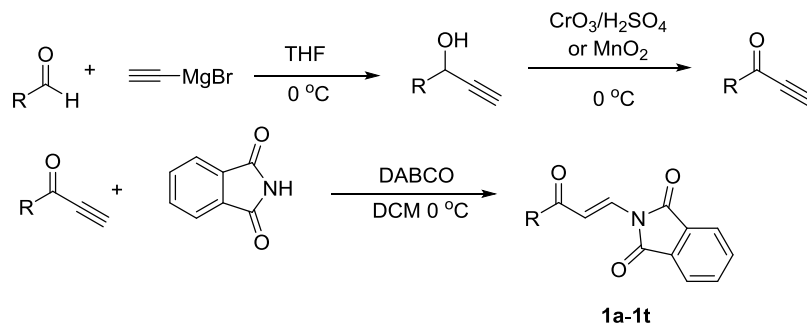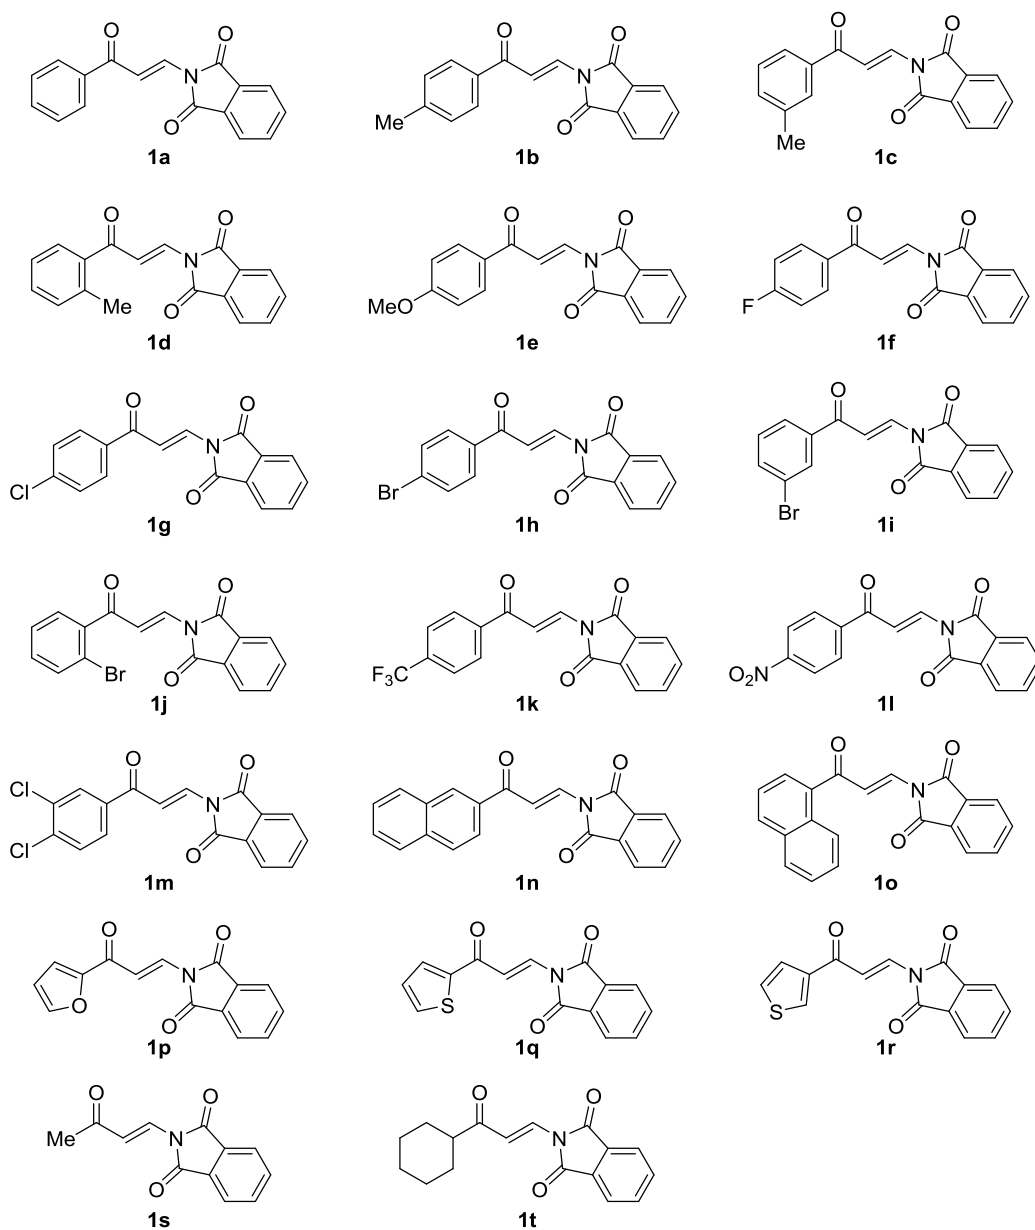

Substrates **1a**, **1e**, **1f**, **1p**, and **1s** are known compounds.<sup>3b</sup> The spectral data were consistent with the literature.<sup>3b</sup> The <sup>1</sup>H NMR, <sup>13</sup>C{<sup>1</sup>H} NMR, <sup>19</sup>F{<sup>1</sup>H} NMR, HRMS spectra and the corresponding characterization data of starting materials **1b-1d**, **1g-1o**, **1q-1r**, and **1t** not reported previously are provided.

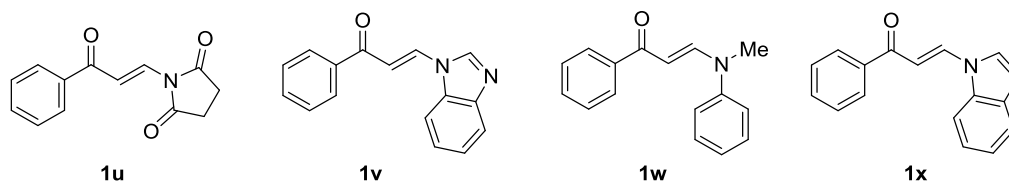

Compound **1u-1w** were prepared according to the literature procedures.<sup>3</sup> Compound **1x** was prepared as described in the literature.<sup>4a</sup> Substrates **1w**<sup>4b</sup> and **1x**<sup>4a</sup> are known compounds, and all spectral data match literature reports. The <sup>1</sup>H NMR, <sup>13</sup>C{<sup>1</sup>H} NMR, HRMS spectra and the corresponding characterization data of starting materials **1u** and **1v** not reported previously are provided.

### Characterization Data for $\beta$ -Aminoenones

#### (*E*)-2-(3-oxo-3-(*p*-tolyl)prop-1-en-1-yl)isoindoline-1,3-dione (**1b**)

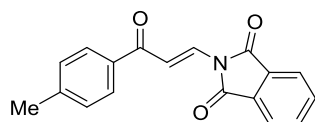

Yellow solid; mp 132-133 °C;

<sup>1</sup>H NMR (600 MHz, CDCl<sub>3</sub>)  $\delta$  8.16-8.08 (m, 2H), 7.98-7.95 (m, 4H), 7.84-7.83 (m, 2H), 7.31-7.30 (m, 2H), 2.44 (s, 3H);

<sup>13</sup>C {<sup>1</sup>H} NMR (100 MHz, CDCl<sub>3</sub>)  $\delta$  189.9, 165.9, 144.0, 135.5, 135.4, 131.6, 131.0, 129.5, 128.8, 124.4, 111.9, 21.8;

HRMS (ESI) *m/z*: [M + Na]<sup>+</sup> Calcd for C<sub>18</sub>H<sub>13</sub>NO<sub>3</sub>Na 314.0788; Found 314.0784.

#### (*E*)-2-(3-oxo-3-(*m*-tolyl)prop-1-en-1-yl)isoindoline-1,3-dione (**1c**)

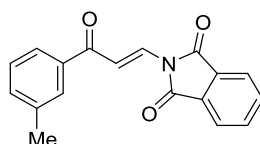

Yellow solid; mp 149-150 °C;

<sup>1</sup>H NMR (600 MHz, CDCl<sub>3</sub>)  $\delta$  8.12-8.04 (m, 2H), 7.95-7.94 (m, 2H), 7.84-7.80 (m, 4H), 7.38-7.36 (m, 2H), 2.43 (s, 3H);

<sup>13</sup>C {<sup>1</sup>H} NMR (150 MHz, CDCl<sub>3</sub>)  $\delta$  190.3, 165.8, 138.5, 138.0, 135.3, 133.9, 131.5, 131.1, 129.0, 128.6, 125.8, 124.3, 111.8, 21.5;

HRMS (ESI) *m/z*: [M + Na]<sup>+</sup> Calcd for C<sub>18</sub>H<sub>13</sub>NO<sub>3</sub>Na 314.0788; Found 314.0786.

#### (*E*)-2-(3-oxo-3-(*o*-tolyl)prop-1-en-1-yl)isoindoline-1,3-dione (**1d**)

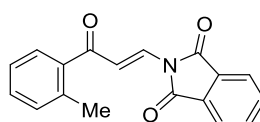



Yellow solid; mp 131-132 °C;

<sup>1</sup>H NMR (400 MHz, CDCl<sub>3</sub>) δ 7.97-7.93 (m, 2H), 7.88-7.75 (m, 4H), 7.58-7.55 (m, 1H), 7.41-7.37 (m, 1H), 7.30-7.26 (m, 2H), 2.49 (s, 3H);

<sup>13</sup>C {<sup>1</sup>H} NMR (100 MHz, CDCl<sub>3</sub>) δ 195.5, 165.7, 138.8, 137.6, 135.4, 131.72, 131.66, 131.6, 131.1, 128.6, 125.8, 124.4, 116.3, 20.7;

HRMS (ESI) *m/z*: [M + Na]<sup>+</sup> Calcd for C<sub>18</sub>H<sub>13</sub>NO<sub>3</sub>Na 314.0788; Found 314.0788.

**(E)-2-(3-(4-chlorophenyl)-3-oxoprop-1-en-1-yl)isoindoline-1,3-dione (1g)**

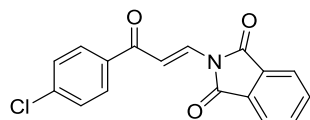

Yellow solid; mp 167-168 °C;

<sup>1</sup>H NMR (400 MHz, CDCl<sub>3</sub>) δ 8.11 (s, 2H), 8.00-7.97 (m, 4H), 7.86-7.84 (m, 2H), 7.49-7.47 (m, 2H);

<sup>13</sup>C {<sup>1</sup>H} NMR (150 MHz, CDCl<sub>3</sub>) δ 189.0, 165.8, 139.6, 136.4, 135.5, 131.7, 131.6, 130.0, 129.1, 124.5, 111.2;

HRMS (ESI) *m/z*: [M + Na]<sup>+</sup> Calcd for C<sub>17</sub>H<sub>10</sub>NO<sub>3</sub>ClNa 334.0241; Found 334.0241.

**(E)-2-(3-(4-bromophenyl)-3-oxoprop-1-en-1-yl)isoindoline-1,3-dione (1h)**

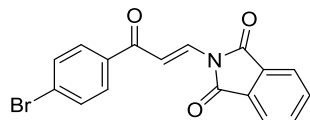

Yellow solid; mp 176-177 °C;

<sup>1</sup>H NMR (600 MHz, CDCl<sub>3</sub>) δ 8.13-8.08 (m, 2H), 7.99-7.97 (m, 2H), 7.91-7.90 (m, 2H), 7.85-7.84 (m, 2H), 7.65-7.64 (m, 2H);

<sup>13</sup>C {<sup>1</sup>H} NMR (100 MHz, CDCl<sub>3</sub>) δ 189.2, 165.8, 136.8, 135.5, 132.1, 131.8, 131.6, 130.1, 128.3, 124.5, 111.1;

HRMS (ESI) *m/z*: [M + Na]<sup>+</sup> Calcd for C<sub>17</sub>H<sub>10</sub>NO<sub>3</sub>BrNa 377.9736; Found 377.9737.

**(E)-2-(3-(3-bromophenyl)-3-oxoprop-1-en-1-yl)isoindoline-1,3-dione (1i)**

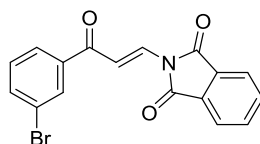

Colorless solid; mp 160-161 °C;

<sup>1</sup>H NMR (600 MHz, CDCl<sub>3</sub>) δ 8.15 (s, 1H), 8.12-8.06 (m, 2H), 7.99-7.94 (m, 3H), 7.85-7.84 (m, 2H), 7.71 (d, *J* = 7.8 Hz, 1H), 7.39 (t, *J* = 7.8 Hz, 1H);

$^{13}\text{C}$   $\{^1\text{H}\}$  NMR (100 MHz,  $\text{CDCl}_3$ )  $\delta$  188.9, 165.7, 139.8, 136.0, 135.5, 132.0, 131.6, 130.4, 127.1, 124.5, 123.2, 111.1;

HRMS (ESI)  $m/z$ :  $[\text{M} + \text{Na}]^+$  Calcd for  $\text{C}_{17}\text{H}_{10}\text{NO}_3\text{BrNa}$  377.9736; Found 377.9738.

**(E)-2-(3-(2-bromophenyl)-3-oxoprop-1-en-1-yl)isoindoline-1,3-dione (1j)**

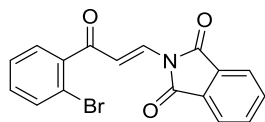

Colorless solid; mp 152-153  $^{\circ}\text{C}$ ;

$^1\text{H}$  NMR (600 MHz,  $\text{CDCl}_3$ )  $\delta$  7.97-7.95 (m, 2H), 7.84-7.79 (m, 3H), 7.73-7.70 (m, 1H), 7.66-7.64 (m, 1H), 7.47-7.40 (m, 2H), 7.36-7.33 (m, 1H);

$^{13}\text{C}$   $\{^1\text{H}\}$  NMR (150 MHz,  $\text{CDCl}_3$ )  $\delta$  194.3, 165.5, 140.9, 135.5, 133.8, 132.5, 131.8, 131.6, 129.4, 127.6, 124.5, 119.7, 116.0;

HRMS (ESI)  $m/z$ :  $[\text{M} + \text{Na}]^+$  Calcd for  $\text{C}_{17}\text{H}_{10}\text{NO}_3\text{BrNa}$  377.9736; Found 377.9736.

**(E)-2-(3-oxo-3-(4-(trifluoromethyl)phenyl)prop-1-en-1-yl)isoindoline-1,3-dione (1k)**

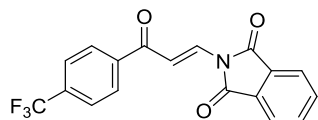

Yellow solid; mp 194-195  $^{\circ}\text{C}$ ;

$^1\text{H}$  NMR (600 MHz,  $\text{CDCl}_3$ )  $\delta$  8.16-8.11 (m, 4H), 8.00-7.99 (m, 2H), 7.86-7.85 (m, 2H), 7.78-7.77 (m, 2H);

$^{13}\text{C}$   $\{^1\text{H}\}$  NMR (150 MHz,  $\text{CDCl}_3$ )  $\delta$  189.4, 165.7, 140.8, 135.6, 134.4 (q,  $J = 33.0$  Hz), 132.2, 131.6, 128.9, 125.8 (q,  $J = 3.0$  Hz), 124.6, 123.8 (q,  $J = 270.0$  Hz), 111.1;

$^{19}\text{F}$   $\{^1\text{H}\}$  NMR (564 MHz,  $\text{CDCl}_3$ )  $\delta$  -63.0;

HRMS (ESI)  $m/z$ :  $[\text{M} + \text{Na}]^+$  Calcd for  $\text{C}_{18}\text{H}_{10}\text{NO}_3\text{F}_3\text{Na}$  368.0505; Found 368.0505.

**(E)-2-(3-(4-nitrophenyl)-3-oxoprop-1-en-1-yl)isoindoline-1,3-dione (1l)**

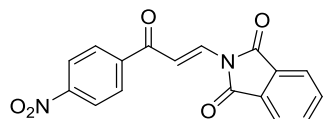

Yellow solid; mp  $>250$   $^{\circ}\text{C}$ ;

$^1\text{H}$  NMR (600 MHz,  $\text{CDCl}_3$ )  $\delta$  8.36 (d,  $J = 8.4$  Hz, 2H), 8.19-8.15 (m, 4H), 8.01-8.00 (m, 2H), 7.88-7.86 (m, 2H);

HRMS (ESI)  $m/z$ :  $[\text{M} + \text{Na}]^+$  Calcd for  $\text{C}_{17}\text{H}_{10}\text{N}_2\text{O}_5\text{Na}$  345.0482; Found

345.0479.

**(E)-2-(3-(3,4-dichlorophenyl)-3-oxoprop-1-en-1-yl)isoindoline-1,3-dione (1m)**

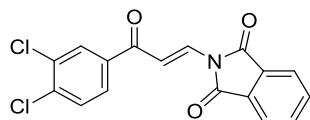

Yellow solid; mp 212-213 °C;

$^1\text{H}$  NMR (600 MHz,  $\text{CDCl}_3$ )  $\delta$  8.15-8.06 (m, 3H), 8.00-7.99 (m, 2H), 7.87-7.85 (m, 3H), 7.60-7.59 (d,  $J = 8.4$  Hz, 1H);

$^{13}\text{C}$  { $^1\text{H}$ } NMR (150 MHz,  $\text{CDCl}_3$ )  $\delta$  188.0, 165.7, 137.73, 137.66, 135.6, 133.5, 132.3, 131.6, 130.9, 130.6, 127.6, 124.6, 110.7;

HRMS (ESI)  $m/z$ :  $[\text{M} + \text{Na}]^+$  Calcd for  $\text{C}_{17}\text{H}_9\text{NO}_3\text{Cl}_2\text{Na}$  367.9852; Found 367.9854.

**(E)-2-(3-(naphthalen-2-yl)-3-oxoprop-1-en-1-yl)isoindoline-1,3-dione (1n)**

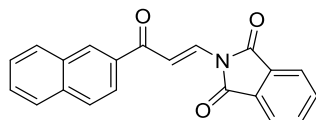

Colorless solid; mp 198-199 °C;

$^1\text{H}$  NMR (600 MHz,  $\text{CDCl}_3$ )  $\delta$  8.56 (s, 1H), 8.32 (d,  $J = 14.4$  Hz, 1H), 8.17 (d,  $J = 14.4$  Hz, 1H), 8.13-8.12 (m, 1H), 8.03-7.98 (m, 3H), 7.94 (d,  $J = 8.4$  Hz, 1H), 7.89 (d,  $J = 7.8$  Hz, 1H), 7.85-7.84 (m, 2H), 7.63-7.56 (m, 2H);

$^{13}\text{C}$  { $^1\text{H}$ } NMR (150 MHz,  $\text{CDCl}_3$ )  $\delta$  190.1, 165.9, 135.8, 135.4, 132.7, 131.7, 131.3, 130.3, 129.8, 128.7, 128.6, 128.0, 126.9, 124.5, 111.9;

HRMS (ESI)  $m/z$ :  $[\text{M} + \text{Na}]^+$  Calcd for  $\text{C}_{21}\text{H}_{13}\text{NO}_3\text{Na}$  350.0788; Found 350.0784.

**(E)-2-(3-(naphthalen-1-yl)-3-oxoprop-1-en-1-yl)isoindoline-1,3-dione (1o)**

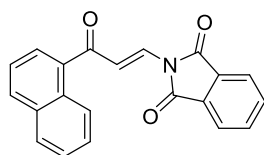

Colorless solid; mp 181-182 °C;

$^1\text{H}$  NMR (600 MHz,  $\text{CDCl}_3$ )  $\delta$  8.46 (d,  $J = 8.4$  Hz, 1H), 8.01-7.89 (m, 6H), 7.85-7.81 (m, 3H), 7.58-7.53 (m, 3H);

$^{13}\text{C}$  { $^1\text{H}$ } NMR (150 MHz,  $\text{CDCl}_3$ )  $\delta$  194.9, 165.7, 136.7, 135.4, 134.0, 132.3, 131.9, 131.6, 130.6, 128.6, 127.8, 127.7, 126.6, 125.8, 124.6, 124.4, 116.7;

HRMS (ESI)  $m/z$ :  $[\text{M} + \text{Na}]^+$  Calcd for  $\text{C}_{21}\text{H}_{13}\text{NO}_3\text{Na}$  350.0788; Found 350.0788.

**(E)-2-(3-oxo-3-(thiophen-2-yl)prop-1-en-1-yl)isoindoline-1,3-dione (1q)**

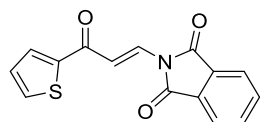

Green solid; mp 176-177 °C;

$^1\text{H}$  NMR (600 MHz,  $\text{CDCl}_3$ )  $\delta$  8.12-8.10 (m, 1H), 8.03-8.01 (m, 1H), 7.98-7.97 (m, 2H), 7.87-7.83 (m, 3H), 7.69 (d,  $J = 4.8$  Hz, 1H), 7.20-7.18 (m, 1H);

$^{13}\text{C}$   $\{^1\text{H}\}$  NMR (150 MHz,  $\text{CDCl}_3$ )  $\delta$  182.5, 165.8, 145.7, 135.4, 134.3, 132.2, 131.7, 130.7, 128.4, 124.5, 111.9;

HRMS (ESI)  $m/z$ :  $[\text{M} + \text{Na}]^+$  Calcd for  $\text{C}_{15}\text{H}_9\text{NO}_3\text{SNa}$  306.0195; Found 306.0194.

**(E)-2-(3-oxo-3-(thiophen-3-yl)prop-1-en-1-yl)isoindoline-1,3-dione (1r)**

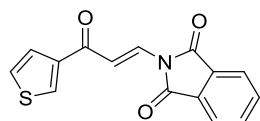

Yellow solid; mp 154-155 °C;

$^1\text{H}$  NMR (600 MHz,  $\text{CDCl}_3$ )  $\delta$  8.18 (dd,  $J = 1.2, 3.0$  Hz, 1H), 8.09-8.07 (m, 1H), 8.00-7.96 (m, 3H), 7.84-7.82 (m, 2H), 7.67 (dd,  $J = 1.2, 5.4$  Hz, 1H), 7.36 (dd,  $J = 3.0, 4.8$  Hz, 1H);

$^{13}\text{C}$   $\{^1\text{H}\}$  NMR (150 MHz,  $\text{CDCl}_3$ )  $\delta$  184.0, 165.8, 143.2, 135.4, 132.5, 131.6, 130.8, 127.5, 126.7, 124.4, 112.7;

HRMS (ESI)  $m/z$ :  $[\text{M} + \text{Na}]^+$  Calcd for  $\text{C}_{15}\text{H}_9\text{NO}_3\text{SNa}$  306.0195; Found 306.0194.

**(E)-2-(3-cyclohexyl-3-oxoprop-1-en-1-yl)isoindoline-1,3-dione (1t)**

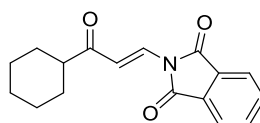

Colorless solid; mp 120-121 °C;

$^1\text{H}$  NMR (600 MHz,  $\text{CDCl}_3$ )  $\delta$  7.96-7.93 (m, 2H), 7.88 (d,  $J = 14.4$  Hz, 1H), 7.84-7.81 (m, 2H), 7.39 (d,  $J = 14.4$  Hz, 1H), 2.57-2.53 (m, 1H), 1.92-1.90 (m, 2H), 1.84-1.81 (m, 2H), 1.72-1.69 (m, 1H), 1.45-1.20 (m, 5H);

$^{13}\text{C}$   $\{^1\text{H}\}$  NMR (150 MHz,  $\text{CDCl}_3$ )  $\delta$  203.3, 165.8, 135.3, 131.6, 129.3, 124.4, 114.4, 50.5, 28.6, 26.0, 25.8;

HRMS (ESI)  $m/z$ :  $[\text{M} + \text{Na}]^+$  Calcd for  $\text{C}_{17}\text{H}_{17}\text{NO}_3\text{Na}$  306.1101; Found 306.1101.

**(E)-1-(3-oxo-3-phenylprop-1-en-1-yl)pyrrolidine-2,5-dione (1u)**

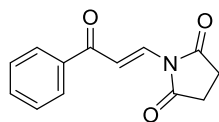

Yellow solid; mp 112-113 °C;

$^1\text{H}$  NMR (400 MHz,  $\text{CDCl}_3$ )  $\delta$  8.17 (d,  $J = 14.4$  Hz, 1H), 8.02-7.99 (m, 2H), 7.90 (d,  $J = 14.4$  Hz, 1H), 7.61-7.57 (m, 1H), 7.52-7.48 (m, 2H), 2.87 (s, 4H);

$^{13}\text{C}$   $\{^1\text{H}\}$  NMR (150 MHz,  $\text{CDCl}_3$ )  $\delta$  190.3, 174.8, 137.7, 133.3, 131.0, 128.8, 128.6, 113.5, 27.9;

HRMS (ESI)  $m/z$ :  $[\text{M} + \text{Na}]^+$  Calcd for  $\text{C}_{13}\text{H}_{11}\text{NO}_3\text{Na}$  252.0631; Found 252.0632.

**(E)-3-(1H-benzo[d]imidazol-1-yl)-1-phenylprop-2-en-1-one (1v)**

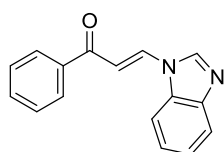

Colorless solid; mp 196-197 °C;

$^1\text{H}$  NMR (600 MHz,  $\text{CDCl}_3$ )  $\delta$  8.35-8.32 (m, 2H), 8.06-8.04 (m, 2H), 7.87 (d,  $J = 7.8$  Hz, 1H), 7.73 (d,  $J = 7.8$  Hz, 1H), 7.65-7.62 (m, 1H), 7.56-7.54 (m, 2H), 7.48-7.41 (m, 3H);

$^{13}\text{C}$   $\{^1\text{H}\}$  NMR (150 MHz,  $\text{CDCl}_3$ )  $\delta$  189.1, 144.8, 141.8, 137.9, 135.8, 133.4, 132.5, 129.0, 128.5, 125.2, 124.7, 121.4, 111.4, 109.1;

HRMS (ESI)  $m/z$ :  $[\text{M} + \text{H}]^+$  Calcd for  $\text{C}_{16}\text{H}_{13}\text{ON}_2$  249.1022; Found 249.1023.

Boronic acids **2a-2c**, **2e**, and **2h-2o** were purchased from commercial suppliers and used without further purification. Boronic acids **2d**, **2f**, and **2g** were prepared according to those reported in the literature.<sup>5</sup>

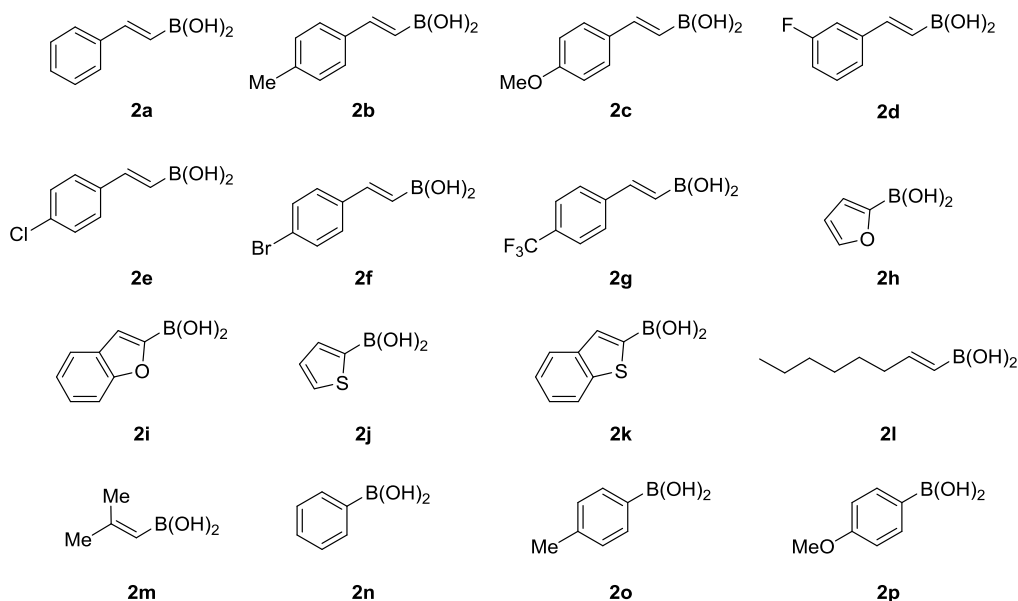

### 3. General procedures for the preparation of racemic products

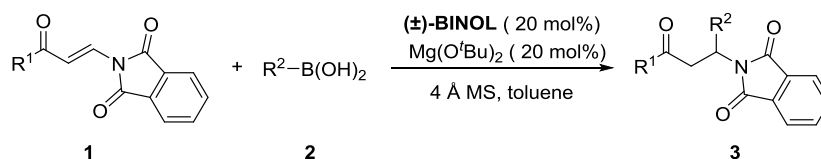

To a 10 mL Schlenk tube equipped with a stirring bar was added 4 Å MS (100 mg), and the tube was flamed-dried under high vacuum. After cooling to r.t., the tube was then backed-filled with nitrogen. Then boronic acid **2a–2m** (0.2 mmol, 2.0 equiv),  $\text{Mg}(\text{O}^t\text{Bu})_2$  (0.02 mmol, 20 mol%),  $(\pm)$ -BINOL (0.02 mmol, 20 mol %),  $\beta$ -aminoenones **1a–1u** (0.1 mmol, 1.0 equiv), and dry toluene (1.0 mL) were successively added to the test tube under  $\text{N}_2$ . The tube was capped, sealed and allowed to stir at 80 °C in an oil bath for 24 h. After the removal of solvents via rotary evaporation, the residue was purified through flash column chromatography on silica gel (eluent: petroleum ether/ethyl acetate = 8:1–5:1) to give pure racemic adducts **3**.

### 4. General procedures for the enantioselective conjugate addition of boronic acids to $\beta$ -aminoenones

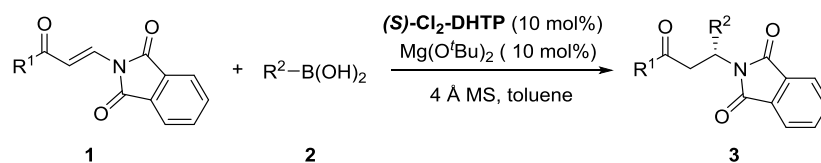

To a 10 mL Schlenk tube equipped with a stirring bar was added 4 Å MS (100 mg), and the tube was flamed-dried under high vacuum. After cooling to r.t., the tube was then backed-filled with nitrogen. Then boronic acid **2a–2m** (0.2 mmol, 2 equiv), **Cat 1** (0.01 mmol, 10 mol %),  $\beta$ -aminoenones **1a–1u** (0.1 mmol, 1.0 equiv), and dry toluene (1.0 mL) were successively added to the test tube under  $\text{N}_2$ . The tube was capped, sealed and allowed to stir at 25 °C for 24–48 h. After the removal of solvents via rotary evaporation, the residue was purified through flash column chromatography on silica gel (eluent: petroleum ether/ ethyl acetate = 8:1–5:1) to give pure adducts **3**.

#### **(*R,E*)-2-(5-oxo-1,5-diphenylpent-1-en-3-yl)isoindoline-1,3-dione (3aa)**<sup>6</sup>

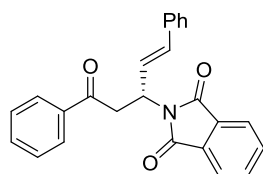

Colorless oil (38.0 mg, 99% yield);

HPLC (Daicel Chiralpak IF, hexane/*i*-PrOH = 80:20, flow rate 1.0 mL/min,  $\lambda =$

254 nm)  $t_R$ (minor) = 22.4 min,  $t_R$ (major) = 23.6 min, 1.0:99.0 *e.r.*, 98% *ee*;  $[\alpha]_D^{26} = -19.0$  (*c* 1.0, CHCl<sub>3</sub>);

<sup>1</sup>H NMR (400 MHz, CDCl<sub>3</sub>)  $\delta$  7.97-7.95 (m, 2H), 7.84-7.81 (m, 2H), 7.70-7.68 (m, 2H), 7.55-7.53 (m, 1H), 7.46-7.42 (m, 2H), 7.38-7.36 (m, 2H), 7.31-7.27 (m, 2H), 7.25-7.21 (m, 1H), 6.71 (d, *J* = 16.0 Hz, 1H), 6.59 (dd, *J* = 8.0, 15.6 Hz, 1H), 5.69-5.63 (m, 1H), 4.14 (dd, *J* = 8.8, 17.6 Hz, 1H), 3.65 (dd, *J* = 5.6, 17.6 Hz, 1H);

HRMS (ESI) *m/z*: [M + Na]<sup>+</sup> Calcd for C<sub>25</sub>H<sub>19</sub>NO<sub>3</sub>Na 404.1257; Found 404.1256.

**(*R,E*)-2-(5-oxo-1-phenyl-5-(*p*-tolyl)pent-1-en-3-yl)isoindoline-1,3-dione (3ba)**

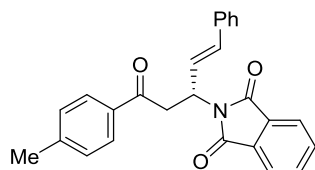

Colorless oil (39.3 mg, 99% yield);

HPLC (Daicel Chiralpak IF, hexane/*i*-PrOH = 70:30, flow rate 1.0 mL/min,  $\lambda$  = 254 nm)  $t_R$ (minor) = 20.5 min,  $t_R$ (major) = 22.1 min, 1.7:98.3 *e.r.*, 97% *ee*;  $[\alpha]_D^{29} = -14.2$  (*c* 2.0, CHCl<sub>3</sub>);

<sup>1</sup>H NMR (600 MHz, CDCl<sub>3</sub>)  $\delta$  7.86-7.81 (m, 4H), 7.69-7.68 (m, 2H), 7.36 (d, *J* = 7.8 Hz, 2H), 7.29-7.21 (m, 5H), 6.70 (d, *J* = 15.6 Hz, 1H), 6.59 (dd, *J* = 7.8, 15.6 Hz, 1H), 5.67-5.64 (m, 1H), 4.10 (dd, *J* = 9.0, 17.4 Hz, 1H), 3.62 (dd, *J* = 5.4, 17.4 Hz, 1H), 2.38 (s, 3H);

<sup>13</sup>C {<sup>1</sup>H} NMR (150 MHz, CDCl<sub>3</sub>)  $\delta$  196.4, 168.1, 144.3, 136.2, 134.2, 134.1, 133.3, 132.1, 129.5, 128.7, 128.4, 128.1, 126.8, 126.0, 123.4, 49.2, 40.7, 21.8;

HRMS (ESI) *m/z*: [M + Na]<sup>+</sup> Calcd for C<sub>26</sub>H<sub>21</sub>NO<sub>3</sub>Na 418.1414; Found 418.1410.

**(*R,E*)-2-(5-oxo-1-phenyl-5-(*m*-tolyl)pent-1-en-3-yl)isoindoline-1,3-dione (3ca)**

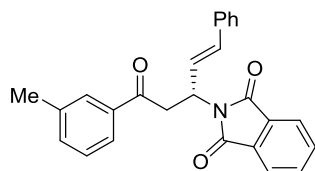

Colorless oil (38.4 mg, 97% yield);

HPLC (Daicel Chiralpak IB, hexane/*i*-PrOH = 70:30, flow rate 1.0 mL/min,  $\lambda$  = 254 nm)  $t_R$ (minor) = 7.1 min,  $t_R$ (major) = 7.7 min, 1.5:98.5 *e.r.*, 97% *ee*;  $[\alpha]_D^{29} = -15.8$  (*c* 1.0, CHCl<sub>3</sub>);

<sup>1</sup>H NMR (400 MHz, CDCl<sub>3</sub>)  $\delta$  7.83-7.81 (m, 2H), 7.76-7.75 (m, 2H), 7.70-7.68 (m, 2H), 7.38-7.20 (m, 7H), 6.71 (d, *J* = 16.0 Hz, 1H), 6.59 (dd, *J* = 8.0, 15.6 Hz, 1H),

5.68-5.63 (m, 1H), 4.12 (dd,  $J = 8.4, 17.6$  Hz, 1H), 3.64 (dd,  $J = 5.6, 17.6$  Hz, 1H), 2.38 (s, 3H);

$^{13}\text{C}$  { $^1\text{H}$ } NMR (100 MHz,  $\text{CDCl}_3$ )  $\delta$  197.0, 168.1, 138.6, 136.7, 136.3, 134.3, 134.1, 133.3, 132.1, 128.8, 128.7, 128.2, 126.8, 126.0, 125.5, 123.4, 49.2, 40.9, 21.5;

HRMS (ESI)  $m/z$ :  $[\text{M} + \text{Na}]^+$  Calcd for  $\text{C}_{26}\text{H}_{21}\text{NO}_3\text{Na}$  418.1414; Found 418.1411.

**(*R,E*)-2-(5-oxo-1-phenyl-5-(*o*-tolyl)pent-1-en-3-yl)isoindoline-1,3-dione (3da)**

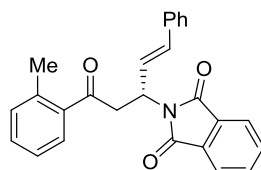

Colorless oil (39.4 mg, 99% yield);

HPLC (Daicel Chiralpak IC, hexane/*i*-PrOH = 70:30, flow rate 1.0 mL/min,  $\lambda = 254$  nm)  $t_R$  (minor) = 9.1 min,  $t_R$  (major) = 10.4 min, 1.0:99.0 *e.r.*, 98% *ee*;  $[\alpha]_D^{29} = -0.5$  ( $c$  1.0,  $\text{CHCl}_3$ );

$^1\text{H}$  NMR (600 MHz,  $\text{CDCl}_3$ )  $\delta$  7.83-7.81 (m, 2H), 7.71-7.68 (m, 3H), 7.37-7.33 (m, 3H), 7.30-7.27 (m, 2H), 7.25-7.19 (m, 3H), 6.69 (d,  $J = 15.6$  Hz, 1H), 6.56 (dd,  $J = 7.8, 15.6$  Hz, 1H), 5.62-5.59 (m, 1H), 4.05 (dd,  $J = 8.4, 16.8$  Hz, 1H), 3.56 (dd,  $J = 6.0, 17.4$  Hz, 1H), 2.41 (s, 3H);

$^{13}\text{C}$  { $^1\text{H}$ } NMR (150 MHz,  $\text{CDCl}_3$ )  $\delta$  200.6, 168.1, 138.6, 137.5, 136.2, 134.1, 133.4, 132.2, 132.1, 131.7, 128.9, 128.7, 128.2, 126.8, 125.90, 125.85, 123.4, 49.5, 43.6, 21.4;

HRMS (ESI)  $m/z$ :  $[\text{M} + \text{Na}]^+$  Calcd for  $\text{C}_{26}\text{H}_{21}\text{NO}_3\text{Na}$  418.1414; Found 418.1411.

**(*R,E*)-2-(5-(4-methoxyphenyl)-5-oxo-1-phenylpent-1-en-3-yl)isoindoline-1,3-dione (3ea)<sup>6</sup>**

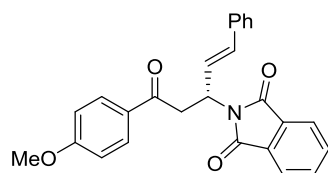

Colorless solid (38.2 mg, 93% yield); mp 102-103 °C;

HPLC (Daicel Chiralpak IB, hexane/*i*-PrOH = 70:30, flow rate 1.0 mL/min,  $\lambda = 254$  nm)  $t_R$  (minor) = 10.2 min,  $t_R$  (major) = 15.5 min, 1.3:98.7 *e.r.*, 97% *ee*;  $[\alpha]_D^{29} = -23.1$  ( $c$  2.0,  $\text{CHCl}_3$ );

$^1\text{H}$  NMR (600 MHz,  $\text{CDCl}_3$ )  $\delta$  7.95-7.93 (m, 2H), 7.83-7.81 (m, 2H), 7.70-7.67 (m, 2H), 7.38-7.36 (m, 2H), 7.30-7.27 (m, 2H), 7.24-7.21 (m, 1H), 6.92-6.90 (m, 2H),



6.70 (d,  $J = 16.2$  Hz, 1H), 6.59 (dd,  $J = 7.8, 15.6$  Hz, 1H), 5.67-5.63 (m, 1H), 4.08 (dd,  $J = 8.4, 17.4$  Hz, 1H), 3.85 (s, 3H), 3.59 (dd,  $J = 6.0, 17.4$  Hz, 1H);

$^{13}\text{C}$  { $^1\text{H}$ } NMR (150 MHz,  $\text{CDCl}_3$ )  $\delta$  195.2, 168.1, 163.8, 136.2, 134.0, 133.2, 132.1, 130.5, 129.8, 128.6, 128.1, 126.8, 126.1, 123.4, 113.9, 55.6, 49.3, 40.4;

HRMS (ESI)  $m/z$ :  $[\text{M} + \text{Na}]^+$  Calcd for  $\text{C}_{26}\text{H}_{21}\text{NO}_4\text{Na}$  434.1363; Found 434.1360.

**(*R,E*)-2-(5-(4-fluorophenyl)-5-oxo-1-phenylpent-1-en-3-yl)isoindoline-1,3-dione (3fa)**<sup>6</sup>

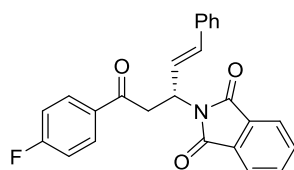

Colorless solid (39.7 mg, 99% yield); mp 106-107 °C;

HPLC (Daicel Chiralpak IB, hexane/*i*-PrOH = 70:30, flow rate 1.0 mL/min,  $\lambda = 254$  nm)  $t_R$  (minor) = 7.9 min,  $t_R$  (major) = 11.3 min, 1.3:98.7 *e.r.*, 97% *ee*;  $[\alpha]_D^{26} = -8.6$  (*c* 2.0,  $\text{CHCl}_3$ );

$^1\text{H}$  NMR (600 MHz,  $\text{CDCl}_3$ )  $\delta$  8.00-7.98 (m, 2H), 7.83-7.82 (m, 2H), 7.71-7.69 (m, 2H), 7.37 (d,  $J = 7.8$  Hz, 2H), 7.30-7.22 (m, 3H), 7.11 (t,  $J = 8.4$  Hz, 2H), 6.71 (d,  $J = 16.2$  Hz, 1H), 6.58 (dd,  $J = 8.4, 16.2$  Hz, 1H), 5.66-5.63 (m, 1H), 4.11 (dd,  $J = 9.0, 18.0$  Hz, 1H), 3.61 (dd,  $J = 5.4, 18.0$  Hz, 1H);

$^{13}\text{C}$  { $^1\text{H}$ } NMR (150 MHz,  $\text{CDCl}_3$ )  $\delta$  168.1, 166.0(d,  $J = 253.5$  Hz), 136.2, 134.2, 135.5, 133.1 (d,  $J = 3.0$  Hz), 132.0, 130.9 (d,  $J = 10.5$  Hz), 128.7, 128.2, 126.8, 125.7, 123.5, 115.9 (d,  $J = 22.5$  Hz), 49.2, 40.8;

$^{19}\text{F}$  { $^1\text{H}$ } NMR (564 MHz,  $\text{CDCl}_3$ )  $\delta$  -104.6;

HRMS (ESI)  $m/z$ :  $[\text{M} + \text{Na}]^+$  Calcd for  $\text{C}_{25}\text{H}_{18}\text{FNO}_3\text{Na}$  422.1163; Found 422.1161.

**(*R,E*)-2-(5-(4-chlorophenyl)-5-oxo-1-phenylpent-1-en-3-yl)isoindoline-1,3-dione (3ga)**

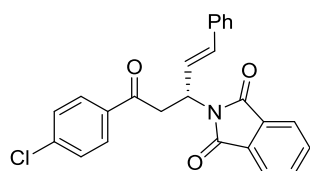

Colorless oil (41.1 mg, 99% yield);

HPLC (Daicel Chiralpak IF, hexane/*i*-PrOH = 70:30, flow rate 1.0 mL/min,  $\lambda = 254$  nm)  $t_R$  (minor) = 18.2 min,  $t_R$  (major) = 20.5 min, 1.3:98.7 *e.r.*, 97% *ee*;  $[\alpha]_D^{29} = -16.8$  (*c* 2.0,  $\text{CHCl}_3$ );

$^1\text{H}$  NMR (600 MHz,  $\text{CDCl}_3$ )  $\delta$  7.90 (d,  $J = 8.4$  Hz, 1H), 7.83-7.82 (m, 2H), 7.70-7.69 (m, 2H), 7.42-7.36 (m, 4H), 7.30-7.28 (m, 2H), 7.24-7.22 (m, 1H), 6.70 (d,  $J = 16.2$  Hz, 1H), 6.57 (dd,  $J = 7.8, 15.6$  Hz, 1H), 5.66-5.62 (m, 1H), 4.11 (dd,  $J = 9.0, 18.0$  Hz, 1H), 3.61 (dd,  $J = 5.4, 17.4$  Hz, 1H);

$^{13}\text{C}$   $\{^1\text{H}\}$  NMR (150 MHz,  $\text{CDCl}_3$ )  $\delta$  195.6, 168.1, 140.0, 136.1, 135.0, 134.2, 133.5, 132.0, 129.7, 129.2, 128.7, 128.3, 126.8, 125.7, 123.5, 49.1, 40.8;

HRMS (ESI)  $m/z$ :  $[\text{M} + \text{Na}]^+$  Calcd for  $\text{C}_{25}\text{H}_{18}\text{ClNO}_3\text{Na}$  438.0867; Found 438.0865.

**(*R,E*)-2-(5-(4-bromophenyl)-5-oxo-1-phenylpent-1-en-3-yl)isoindoline-1,3-dione (3ha)**

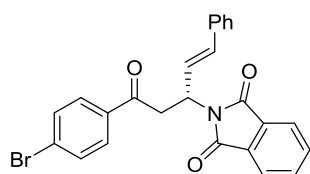

Colorless solid (45.1 mg, 98% yield); mp 65-66  $^{\circ}\text{C}$ ;

HPLC (Daicel Chiralpak IB, hexane/*i*-PrOH = 70:30, flow rate 1.0 mL/min,  $\lambda = 254$  nm)  $t_R$  (minor) = 9.5 min,  $t_R$  (major) = 17.2 min, 1.6:98.4 *e.r.*, 97% *ee*;  $[\alpha]_{\text{D}}^{28} = -13.7$  (*c* 2.0,  $\text{CHCl}_3$ );

$^1\text{H}$  NMR (400 MHz,  $\text{CDCl}_3$ )  $\delta$  7.84-7.80 (m, 4H), 7.71-7.69 (m, 2H), 7.60-7.57 (m, 2H), 7.38-7.35 (m, 2H), 7.31-7.27 (m, 2H), 7.25-7.23 (m, 1H), 6.71 (d,  $J = 16.0$  Hz, 1H), 6.57 (dd,  $J = 8.0, 15.6$  Hz, 1H), 5.66-5.62 (m, 1H), 4.10 (dd,  $J = 8.8, 17.6$  Hz, 1H), 3.60 (dd,  $J = 5.6, 17.6$  Hz, 1H);

$^{13}\text{C}$   $\{^1\text{H}\}$  NMR (150 MHz,  $\text{CDCl}_3$ )  $\delta$  195.8, 168.1, 136.1, 135.4, 134.2, 133.6, 132.1, 132.0, 129.8, 128.8, 128.7, 128.3, 126.8, 125.7, 123.5, 49.1, 40.8;

HRMS (ESI)  $m/z$ :  $[\text{M} + \text{Na}]^+$  Calcd for  $\text{C}_{25}\text{H}_{18}\text{NO}_3\text{BrNa}$  482.0362; Found 482.0361.

**(*R,E*)-2-(5-(3-bromophenyl)-5-oxo-1-phenylpent-1-en-3-yl)isoindoline-1,3-dione (3ia)**

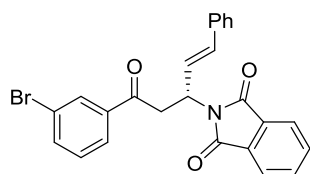

Colorless oil (45.3 mg, 98% yield);

HPLC (Daicel Chiralpak IB, hexane/*i*-PrOH = 70:30, flow rate 1.0 mL/min,  $\lambda = 254$  nm)  $t_R$  (minor) = 9.0 min,  $t_R$  (major) = 10.8 min, 2.0:98.0 *e.r.*, 96% *ee*;  $[\alpha]_{\text{D}}^{29} = -13.3$  (*c* 2.0,  $\text{CHCl}_3$ );

$^1\text{H}$  NMR (400 MHz,  $\text{CDCl}_3$ )  $\delta$  8.08-8.07 (m, 1H), 7.89-7.82 (m, 3H), 7.71-7.66 (m, 3H), 7.38-7.27 (m, 5H), 7.25-7.23 (m, 1H), 6.71 (d,  $J = 16.0$  Hz, 1H), 6.57 (dd,  $J = 8.0$  16.0 Hz, 1H), 5.65-5.62 (m, 1H), 4.11 (dd,  $J = 8.8$ , 18.0 Hz, 1H), 3.62 (dd,  $J = 5.6$ , 18.0 Hz, 1H);

$^{13}\text{C}$   $\{^1\text{H}\}$  NMR (150 MHz,  $\text{CDCl}_3$ )  $\delta$  195.5, 168.1, 138.3, 136.4, 136.1, 134.2, 133.6, 132.0, 131.4, 130.4, 128.7, 128.3, 126.82, 126.79, 125.6, 123.5, 123.2, 49.0, 41.0;

HRMS (ESI)  $m/z$ :  $[\text{M} + \text{Na}]^+$  Calcd for  $\text{C}_{25}\text{H}_{18}\text{NO}_3\text{BrNa}$  482.0362; Found 428.0363.

**(*R,E*)-2-(5-(2-bromophenyl)-5-oxo-1-phenylpent-1-en-3-yl)isoindoline-1,3-dione (3ja)**

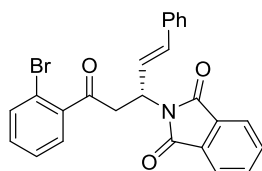

Colorless oil (44.4 mg, 97% yield);

HPLC (Daicel Chiralpak IF, hexane/*i*-PrOH = 70:30, flow rate 1.0 mL/min,  $\lambda = 254$  nm)  $t_R$ (minor) = 15.3 min,  $t_R$ (major) = 17.5 min, 1.2:98.8 *e.r.*, 98% *ee*;  $[\alpha]_D^{26} = +5.8$  (*c* 2.0,  $\text{CHCl}_3$ );

$^1\text{H}$  NMR (600 MHz,  $\text{CDCl}_3$ )  $\delta$  7.84-7.82 (m, 2H), 7.72-7.69 (m, 2H), 7.58 (d,  $J = 7.8$  Hz, 1H), 7.40-7.22 (m, 8H), 6.69 (d,  $J = 16.2$  Hz, 1H), 6.54 (dd,  $J = 7.8$ , 15.6 Hz, 1H), 5.61-5.57 (m, 1H), 4.03 (dd,  $J = 9.0$ , 18.0 Hz, 1H), 3.65 (dd,  $J = 6.0$ , 17.4 Hz, 1H);

$^{13}\text{C}$   $\{^1\text{H}\}$  NMR (100 MHz,  $\text{CDCl}_3$ )  $\delta$  200.5, 168.0, 141.0, 136.1, 134.1, 133.9, 133.6, 132.02, 132.01, 128.9, 128.7, 128.2, 127.6, 126.8, 125.5, 123.4, 119.0, 49.2, 44.7;

HRMS (ESI)  $m/z$ :  $[\text{M} + \text{Na}]^+$  Calcd for  $\text{C}_{25}\text{H}_{18}\text{NO}_3\text{BrNa}$  482.0362; Found 428.0360.

**(*R,E*)-2-(5-oxo-1-phenyl-5-(4-(trifluoromethyl)phenyl)pent-1-en-3-yl)isoindoline-1,3-dione (3ka)**

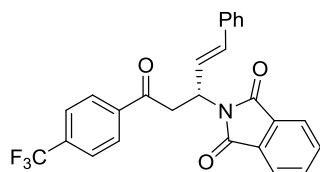

Colorless oil (44.8 mg, 99% yield);

HPLC (Daicel Chiralpak IB, hexane/*i*-PrOH = 70:30, flow rate 1.0 mL/min,  $\lambda =$

254 nm)  $t_R$  (minor) = 9.4 min,  $t_R$  (major) = 19.3 min, 0.8:99.2 *e.r.*, 98% *ee*;  $[\alpha]_D^{26} = -11.6$  (*c* 2.0, CHCl<sub>3</sub>);

<sup>1</sup>H NMR (400 MHz, CDCl<sub>3</sub>)  $\delta$  8.06 (d, *J* = 7.8 Hz, 2H), 7.84-7.82 (m, 2H), 7.72-7.69 (m, 4H), 7.38-7.36 (m, 2H), 7.31-7.22 (m, 3H), 6.72 (d, *J* = 16.2 Hz, 1H), 6.58 (dd, *J* = 7.8, 15.6 Hz, 1H), 5.68-5.62 (m, 1H), 4.18 (dd, *J* = 9.0, 18.0 Hz, 1H), 3.66 (dd, *J* = 5.4, 17.4 Hz, 1H);

<sup>13</sup>C {<sup>1</sup>H} NMR (150 MHz, CDCl<sub>3</sub>)  $\delta$  196.0, 168.1, 139.2, 136.1, 134.8 (q, *J* = 33.0 Hz), 134.2, 133.7, 132.0, 128.7, 128.6, 128.3, 126.8, 125.9 (q, *J* = 3.0 Hz), 125.5, 123.6 (q, *J* = 270.0 Hz), 123.5, 49.1, 41.2;

<sup>19</sup>F {<sup>1</sup>H} NMR (564 MHz, CDCl<sub>3</sub>)  $\delta$  -63.2;

HRMS (ESI) *m/z*: [M + Na]<sup>+</sup> Calcd for C<sub>26</sub>H<sub>18</sub>NO<sub>3</sub>F<sub>3</sub>Na 472.1131; Found 472.1131.

**(*R,E*)-2-(5-(4-nitrophenyl)-5-oxo-1-phenylpent-1-en-3-yl)isoindoline-1,3-dione (3la)**

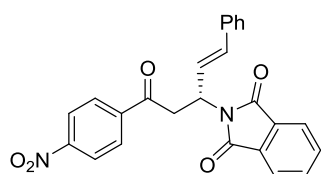

Yellow solid (41.3 mg, 97% yield); mp 116-118 °C;

HPLC (Daicel Chiralpak IB, hexane/*i*-PrOH = 60:40, flow rate 1.0 mL/min,  $\lambda$  = 254 nm)  $t_R$  (minor) = 19.5 min,  $t_R$  (major) = 43.0 min, 2.1:97.9 *e.r.*, 96% *ee*;  $[\alpha]_D^{26} = -18.2$  (*c* 2.0, CHCl<sub>3</sub>);

<sup>1</sup>H NMR (600 MHz, CDCl<sub>3</sub>)  $\delta$  8.31-8.29 (m, 2H), 8.12-8.10 (m, 2H), 7.85-7.82 (m, 2H), 7.73-7.70 (m, 2H), 7.38-7.37 (m, 2H), 7.31-7.29 (m, 2H), 7.26-7.23 (m, 1H), 6.73 (d, *J* = 16.2 Hz, 1H), 6.57 (dd, *J* = 8.4, 15.6 Hz, 1H), 5.67-5.63 (m, 1H), 4.20 (dd, *J* = 8.4, 18.0 Hz, 1H), 3.69 (dd, *J* = 5.4, 18.0 Hz, 1H);

<sup>13</sup>C {<sup>1</sup>H} NMR (150 MHz, CDCl<sub>3</sub>)  $\delta$  195.4, 168.1, 150.6, 140.9, 136.0, 134.3, 133.9, 131.9, 129.3, 128.8, 128.4, 126.8, 125.3, 124.1, 123.5, 49.0, 41.5;

HRMS (ESI) *m/z*: [M + Na]<sup>+</sup> Calcd for C<sub>25</sub>H<sub>18</sub>N<sub>2</sub>O<sub>5</sub>Na 449.1108; Found 449.1109.

**(*R,E*)-2-(5-(3,4-dichlorophenyl)-5-oxo-1-phenylpent-1-en-3-yl)isoindoline-1,3-dione (3ma)**

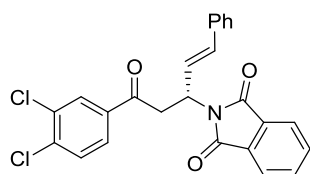

Colorless solid (42.8 mg, 95% yield); mp 165-167 °C;

HPLC (Daicel Chiralpak IB, hexane/*i*-PrOH = 70:30, flow rate 1.0 mL/min,  $\lambda$  = 254 nm)  $t_R$  (minor) = 9.4 min,  $t_R$  (major) = 17.1 min, 1.7:98.3 *e.r.*, 97% *ee*;  $[\alpha]_D^{28} = -18.0$  (*c* 2.0, CHCl<sub>3</sub>);

<sup>1</sup>H NMR (600 MHz, CDCl<sub>3</sub>)  $\delta$  8.02 (d, *J* = 1.8 Hz, 1H), 7.84-7.77 (m, 3H), 7.71-7.69 (m, 2H), 7.53-7.52 (m, 1H), 7.37-7.36 (m, 2H), 7.30-7.27 (m, 2H), 7.26-7.22 (m, 1H), 6.71 (d, *J* = 15.6 Hz, 1H), 6.56 (dd, *J* = 7.8, 15.6 Hz, 1H), 5.64-5.61 (m, 1H), 4.10 (dd, *J* = 9.0, 18.0 Hz, 1H), 3.60 (dd, *J* = 5.4, 17.4 Hz, 1H);

<sup>13</sup>C {<sup>1</sup>H} NMR (150 MHz, CDCl<sub>3</sub>)  $\delta$  194.7, 168.1, 138.2, 136.11, 136.05, 134.2, 133.7, 133.6, 132.0, 131.0, 130.3, 128.7, 128.3, 127.3, 126.8, 125.4, 123.5, 49.0, 40.9;

HRMS (ESI) *m/z*: [M + Na]<sup>+</sup> Calcd for C<sub>25</sub>H<sub>17</sub>NO<sub>3</sub>Cl<sub>2</sub>Na 472.0478; Found 472.0477.

**(*R,E*)-2-(5-(naphthalen-2-yl)-5-oxo-1-phenylpent-1-en-3-yl)isoindoline-1,3-dione (3na)**

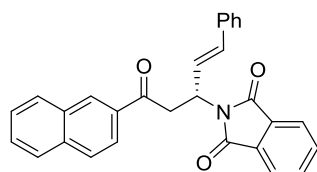

Colorless oil (43.0 mg, 99% yield);

HPLC (Daicel Chiralpak IB, hexane/*i*-PrOH = 60:40, flow rate 1.0 mL/min,  $\lambda$  = 254 nm)  $t_R$  (minor) = 8.6 min,  $t_R$  (major) = 11.6 min, 1.8:98.2 *e.r.*, 96% *ee*;  $[\alpha]_D^{28} = -29.5$  (*c* 2.0, CHCl<sub>3</sub>);

<sup>1</sup>H NMR (600 MHz, CDCl<sub>3</sub>)  $\delta$  8.50 (s, 1H), 8.01-7.99 (m, 1H), 7.95 (d, *J* = 7.8 Hz, 1H), 7.86-7.80 (m, 4H), 7.68-7.65 (m, 2H), 7.59-7.52 (m, 2H), 7.39-7.37 (m, 2H), 7.30-7.27 (m, 2H), 7.23-7.21 (m, 1H), 6.74 (d, *J* = 15.6 Hz, 1H), 6.64 (dd, *J* = 7.8, 15.6 Hz, 1H), 5.75-5.71 (m, 1H), 4.27 (dd, *J* = 9.0, 18.0 Hz, 1H), 3.78 (dd, *J* = 5.4, 17.4 Hz, 1H);

<sup>13</sup>C {<sup>1</sup>H} NMR (150 MHz, CDCl<sub>3</sub>)  $\delta$  196.7, 168.2, 136.2, 135.9, 134.1, 134.0, 133.4, 132.6, 132.1, 130.1, 129.8, 128.8, 128.7, 128.2, 127.9, 127.0, 126.8, 126.0, 123.8, 123.5, 49.3, 40.9;

HRMS (ESI) *m/z*: [M + Na]<sup>+</sup> Calcd for C<sub>29</sub>H<sub>21</sub>NO<sub>3</sub>Na 454.1414; Found 454.1414.

**(*R,E*)-2-(5-(naphthalen-1-yl)-5-oxo-1-phenylpent-1-en-3-yl)isoindoline-1,3-dione (3oa)**

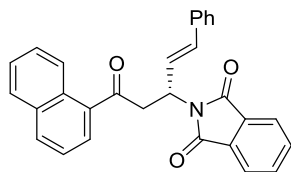

Colorless solid (42.9 mg, 99% yield); mp 165-166 °C;

HPLC (Daicel Chiralpak IB, hexane/*i*-PrOH = 60:40, flow rate 1.0 mL/min,  $\lambda$  = 254 nm)  $t_R$ (major) = 9.4 min,  $t_R$ (minor) = 14.0 min, 99.0:1.0 *e.r.*, 98% *ee*;  $[\alpha]_D^{27} = +5.7$  (*c* 2.0, CHCl<sub>3</sub>);

<sup>1</sup>H NMR (400 MHz, CDCl<sub>3</sub>)  $\delta$  8.55-8.53 (m, 1H), 7.96 (d, *J* = 7.6 Hz, 1H), 7.84-7.78 (m, 3H), 7.70-7.67 (m, 2H), 7.52-7.46 (m, 3H), 7.37-7.35 (m, 2H), 7.30-7.27 (m, 2H), 7.24-7.21 (m, 1H), 6.72 (d, *J* = 16.0 Hz, 1H), 6.60 (dd, *J* = 8.0, 16.0 Hz, 1H), 5.74-5.68 (m, 1H), 4.27 (dd, *J* = 8.8, 17.2 Hz, 1H), 3.68 (dd, *J* = 6.0, 17.2 Hz, 1H);

<sup>13</sup>C {<sup>1</sup>H} NMR (100 MHz, CDCl<sub>3</sub>)  $\delta$  200.7, 168.1, 136.2, 135.2, 134.1, 134.0, 133.5, 133.2, 132.0, 130.2, 128.7, 128.5, 128.3, 128.17, 128.15, 126.8, 126.6, 125.9, 125.8, 124.5, 123.4, 49.6, 44.0;

HRMS (ESI) *m/z*: [M + Na]<sup>+</sup> Calcd for C<sub>29</sub>H<sub>21</sub>NO<sub>3</sub>Na 454.1414; Found 454.1411.

**(*R,E*)-2-(5-(furan-2-yl)-5-oxo-1-phenylpent-1-en-3-yl)isoindoline-1,3-dione (3pa)**

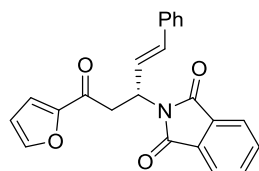

Colorless oil (35.3 mg, 95% yield);

HPLC (Daicel Chiralpak IB, hexane/*i*-PrOH = 60:40, flow rate 1.0 mL/min,  $\lambda$  = 254 nm)  $t_R$ (minor) = 7.8 min,  $t_R$ (major) = 10.0 min, 2.5:97.5 *e.r.*, 95% *ee*;  $[\alpha]_D^{26} = +0.3$  (*c* 2.0, CHCl<sub>3</sub>);

<sup>1</sup>H NMR (400 MHz, CDCl<sub>3</sub>)  $\delta$  7.86-7.80 (m, 2H), 7.71-7.61 (m, 2H), 7.56 (d, *J* = 1.2 Hz, 1H), 7.38-7.35 (m, 2H), 7.30-7.27 (m, 2H), 7.24-7.21 (m, 2H), 6.70 (d, *J* = 16.0 Hz, 1H), 6.58 (dd, *J* = 8.0, 15.6 Hz, 1H), 6.51 (dd, *J* = 1.6, 3.6 Hz, 1H), 5.64-5.58 (m, 1H), 3.90 (dd, *J* = 8.8, 16.8 Hz, 1H), 3.55 (dd, *J* = 6.0, 16.8 Hz, 1H);

<sup>13</sup>C {<sup>1</sup>H} NMR (100 MHz, CDCl<sub>3</sub>)  $\delta$  185.7, 168.0, 152.5, 146.8, 136.2, 134.1, 133.5, 132.1, 128.7, 128.2, 126.8, 125.7, 123.4, 117.8, 112.5, 49.1, 40.8;

HRMS (ESI) *m/z*: [M + Na]<sup>+</sup> Calcd for C<sub>23</sub>H<sub>17</sub>NO<sub>4</sub>Na 394.1050; Found 394.1050.

**(*R,E*)-2-(5-oxo-1-phenyl-5-(thiophen-2-yl)pent-1-en-3-yl)isoindoline-1,3-dione**

**(3qa)**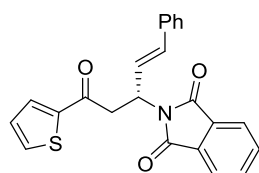

Colorless solid (38.6 mg, 99% yield); mp 101-103 °C;

HPLC (Daicel Chiralpak IB, hexane/*i*-PrOH = 60:40, flow rate 1.0 mL/min,  $\lambda$  = 254 nm)  $t_R$  (minor) = 8.1 min,  $t_R$  (major) = 9.5 min, 1.6:98.4 *e.r.*, 97% *ee*;  $[\alpha]_D^{27} = -11.7$  (*c* 2.0, CHCl<sub>3</sub>);

<sup>1</sup>H NMR (400 MHz, CDCl<sub>3</sub>)  $\delta$  7.83-7.61 (m, 6H), 7.37-7.21 (m, 5H), 7.13-7.10 (m, 1H), 6.70 (d, *J* = 16.0 Hz, 1H), 6.58 (dd, *J* = 8.0, 16.0 Hz, 1H), 5.66-5.61 (m, 1H), 4.04 (dd, *J* = 8.8, 16.8 Hz, 1H), 3.59 (dd, *J* = 5.6, 16.8 Hz, 1H);

<sup>13</sup>C {<sup>1</sup>H} NMR (100 MHz, CDCl<sub>3</sub>)  $\delta$  189.6, 168.0, 143.9, 136.1, 134.3, 134.1, 133.5, 132.5, 132.0, 128.7, 128.3, 128.2, 126.8, 125.6, 123.5, 49.3, 41.5;

HRMS (ESI) *m/z*: [M + Na]<sup>+</sup> Calcd for C<sub>23</sub>H<sub>17</sub>NO<sub>3</sub>SNa 410.0821; Found 410.0820.

**(*R,E*)-2-(5-oxo-1-phenyl-5-(thiophen-3-yl)pent-1-en-3-yl)isoindoline-1,3-dione****(3ra)**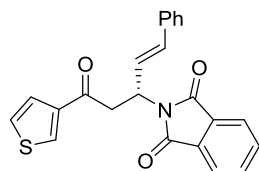

Colorless solid (37.4 mg, 97% yield); mp 52-54 °C;

HPLC (Daicel Chiralpak IB, hexane/*i*-PrOH = 60:40, flow rate 1.0 mL/min,  $\lambda$  = 254 nm)  $t_R$  (minor) = 8.1 min,  $t_R$  (major) = 10.1 min, 1.7:98.3 *e.r.*, 97% *ee*;  $[\alpha]_D^{26} = -13.7$  (*c* 2.0, CHCl<sub>3</sub>);

<sup>1</sup>H NMR (400 MHz, CDCl<sub>3</sub>)  $\delta$  8.11-8.09 (m, 1H), 7.84-7.80 (m, 2H), 7.71-7.67 (m, 2H), 7.53-7.52 (m, 1H), 7.38-7.36 (m, 2H), 7.30-7.21 (m, 4H), 6.70 (d, *J* = 16.0 Hz, 1H), 6.57 (dd, *J* = 8.0, 15.6 Hz, 1H), 5.66-5.61 (m, 1H), 4.03 (dd, *J* = 8.8, 17.2 Hz, 1H), 3.54 (dd, *J* = 6.0, 17.2 Hz, 1H);

<sup>13</sup>C {<sup>1</sup>H} NMR (100 MHz, CDCl<sub>3</sub>)  $\delta$  191.0, 168.1, 142.0, 136.2, 134.1, 133.4, 132.6, 132.1, 128.7, 128.2, 127.0, 126.8, 126.7, 125.8, 123.5, 49.2, 42.0;

HRMS (ESI) *m/z*: [M + Na]<sup>+</sup> Calcd for C<sub>23</sub>H<sub>17</sub>NO<sub>3</sub>SNa 410.0821; Found 410.0816.

**(*R,E*)-2-(5-oxo-1-phenylhex-1-en-3-yl)isoindoline-1,3-dione (3sa)**

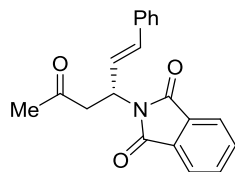

Colorless oil (31.7 mg, 99% yield);

HPLC (Daicel Chiralpak IB, hexane/*i*-PrOH = 60:40, flow rate 1.0 mL/min,  $\lambda = 254$  nm)  $t_R$ (minor) = 6.5 min,  $t_R$ (major) = 7.0 min, 1.1:98.9 *e.r.*, 98% *ee*;  $[\alpha]_D^{28} = +2.8$  (*c* 2.0, CHCl<sub>3</sub>);

<sup>1</sup>H NMR (600 MHz, CDCl<sub>3</sub>)  $\delta$  7.84-7.81 (m, 2H), 7.71-7.69 (m, 2H), 7.36-7.34 (m, 2H), 7.29-7.26 (m, 2H), 7.24-7.21 (m, 1H), 6.65 (d, *J* = 15.6 Hz, 1H), 6.47 (dd, *J* = 8.4, 15.6 Hz, 1H), 5.46-5.43 (m, 1H), 3.52 (dd, *J* = 8.4, 17.4 Hz, 1H), 3.16 (dd, *J* = 6.0, 17.4 Hz, 1H), 2.17 (s, 3H);

<sup>13</sup>C {<sup>1</sup>H} NMR (150 MHz, CDCl<sub>3</sub>)  $\delta$  205.2, 168.0, 136.1, 134.1, 133.3, 132.0, 128.7, 128.2, 126.8, 125.6, 123.4, 48.8, 45.6, 30.4;

HRMS (ESI) *m/z*: [M + Na]<sup>+</sup> Calcd for C<sub>20</sub>H<sub>17</sub>NO<sub>3</sub>Na 342.1101; Found 342.1094.

**(*R,E*)-2-(5-cyclohexyl-5-oxo-1-phenylpent-1-en-3-yl)isoindoline-1,3-dione (3ta)**

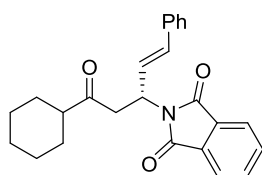

Colorless solid (38.5 mg, 99% yield); mp 101-103 °C;

HPLC (Daicel Chiralpak IB, hexane/*i*-PrOH = 60:40, flow rate 1.0 mL/min,  $\lambda = 254$  nm)  $t_R$ (minor) = 5.5 min,  $t_R$ (major) = 6.3 min, 0.8:99.2 *e.r.*, 98% *ee*;  $[\alpha]_D^{28} = -2.6$  (*c* 2.0, CHCl<sub>3</sub>);

<sup>1</sup>H NMR (600 MHz, CDCl<sub>3</sub>)  $\delta$  7.84-7.81 (m, 2H), 7.71-7.68 (m, 2H), 7.35-7.34 (m, 2H), 7.29-7.27 (m, 2H), 7.23-7.21 (m, 2H), 6.63 (d, *J* = 15.6 Hz, 1H), 6.47 (dd, *J* = 8.4, 16.2 Hz, 1H), 5.47-5.43 (m, 1H), 3.54 (dd, *J* = 8.4, 17.4 Hz, 1H), 3.15 (dd, *J* = 6.0, 18.0 Hz, 1H), 2.36-2.32 (m, 1H), 1.84-1.63 (m, 5H), 1.35-1.12 (m, 5H);

<sup>13</sup>C {<sup>1</sup>H} NMR (150 MHz, CDCl<sub>3</sub>)  $\delta$  210.5, 168.1, 136.2, 134.1, 133.2, 132.1, 128.7, 128.1, 126.7, 125.9, 123.4, 51.2, 48.8, 42.6, 28.4, 28.3, 25.9, 25.69, 25.66;

HRMS (ESI) *m/z*: [M + Na]<sup>+</sup> Calcd for C<sub>25</sub>H<sub>25</sub>NO<sub>3</sub>Na 410.1727; Found 410.1724.

**(*R,E*)-1-(5-oxo-1,5-diphenylpent-1-en-3-yl)pyrrolidine-2,5-dione (3ua)**



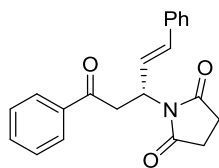

Colorless solid (29.2 mg, 88% yield); mp 117-118 °C;

HPLC (Daicel Chiralpak IF, hexane/*i*-PrOH = 70:30, flow rate 1.0 mL/min,  $\lambda$  = 254 nm)  $t_R$ (minor) = 13.8 min,  $t_R$ (major) = 16.0 min, 1.3:98.7 *e.r.*, 97% *ee*;  $[\alpha]_D^{29} = -10.4$  (*c* 2.0, CHCl<sub>3</sub>);

<sup>1</sup>H NMR (600 MHz, CDCl<sub>3</sub>)  $\delta$  7.94 (d, *J* = 7.8 Hz, 1H), 7.58-7.56 (m, 1H), 7.47-7.45 (m, 2H), 7.37 (d, *J* = 7.2 Hz, 2H), 7.31-7.29 (m, 2H), 7.26-7.23 (m, 1H), 6.68 (d, *J* = 15.6 Hz, 1H), 6.53 (dd, *J* = 8.4, 16.2 Hz, 1H), 5.49-5.45 (m, 1H), 4.07 (dd, *J* = 9.0, 17.4 Hz, 1H), 3.51 (dd, *J* = 5.4, 17.4 Hz, 1H), 2.66 (s, 4H);

<sup>13</sup>C {<sup>1</sup>H} NMR (150 MHz, CDCl<sub>3</sub>)  $\delta$  197.0, 177.1, 136.6, 136.1, 133.9, 133.6, 128.8, 128.7, 128.3, 128.2, 126.8, 125.1, 50.1, 39.9, 28.2;

HRMS (ESI) *m/z*: [M + Na]<sup>+</sup> Calcd for C<sub>21</sub>H<sub>19</sub>NO<sub>3</sub>Na 356.1257; Found 356.1256.

**(2E,4E)-1,5-diphenylpenta-2,4-dien-1-one (4)**<sup>7</sup>

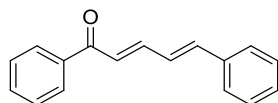

Yellow solid; mp 97-98 °C;

<sup>1</sup>H NMR (400 MHz, CDCl<sub>3</sub>)  $\delta$  7.99-7.97 (m, 2H), 7.64-7.47 (m, 6H), 7.40-7.33 (m, 3H), 7.10 (d, *J* = 14.8 Hz, 1H), 7.04-7.02 (m, 2H).

HRMS (ESI) *m/z*: [M + Na]<sup>+</sup> Calcd for C<sub>17</sub>H<sub>14</sub>ONa 257.0937; Found 257.0926.

**(E)-1,5-diphenyl-3-((E)-styryl)pent-4-en-1-one (5)**<sup>8</sup>

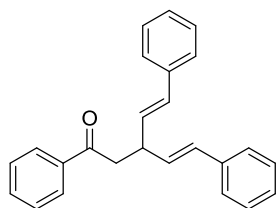

Colorless solid (21.9 mg, 65% yield); mp 66-68 °C;

<sup>1</sup>H NMR (400 MHz, CDCl<sub>3</sub>)  $\delta$  7.99-7.96 (m, 2H), 7.58-7.54 (m, 1H), 7.48-7.44 (m, 2H), 7.36-7.26 (m, 8H), 7.22-7.18 (m, 2H), 6.49 (d, *J* = 16.0 Hz, 2H), 6.29 (dd, *J* = 7.2, 16.0 Hz, 2H), 3.90-3.83 (m, 1H), 3.29 (d, *J* = 6.8 Hz, 2H).

HRMS (ESI) *m/z*: [M + Na]<sup>+</sup> Calcd for C<sub>25</sub>H<sub>22</sub>ONa 361.1563; Found 361.1547.

**(R,E)-2-(5-oxo-5-phenyl-1-(*p*-tolyl)pent-1-en-3-yl)isoindoline-1,3-dione (3ab)**<sup>6</sup>

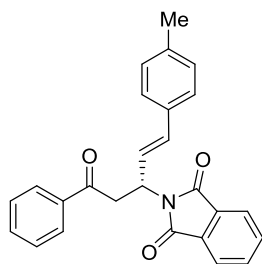

Colorless solid (39.1 mg, 99% yield); mp 110-111 °C;

HPLC (Daicel Chiralpak IC, hexane/*i*-PrOH = 90:10, flow rate 1.0 mL/min,  $\lambda$  = 254 nm)  $t_R$ (minor) = 27.4 min,  $t_R$ (major) = 29.4 min, 2.5:97.5 *e.r.*, 95% *ee*;  $[\alpha]_D^{28}$  = -3.7 (*c* 2.0, CHCl<sub>3</sub>);

<sup>1</sup>H NMR (600 MHz, CDCl<sub>3</sub>)  $\delta$  7.96-7.95 (m, 2H), 7.83-7.80 (m, 2H), 7.70-7.67 (m, 2H), 7.56-7.53 (m, 1H), 7.45-7.43 (m, 2H), 7.27-7.25 (m, 2H), 7.09 (d, *J* = 8.4 Hz, 2H), 6.67 (d, *J* = 15.6 Hz, 1H), 6.54 (dd, *J* = 7.8, 15.6 Hz, 1H), 5.66-5.62 (m, 1H), 4.14 (dd, *J* = 8.4, 17.4 Hz, 1H), 3.63 (dd, *J* = 6.0, 18.0 Hz, 1H), 2.31 (s, 3H);

<sup>13</sup>C {<sup>1</sup>H} NMR (150 MHz, CDCl<sub>3</sub>)  $\delta$  196.9, 168.1, 138.1, 136.7, 134.1, 133.5, 133.4, 133.3, 132.1, 129.4, 128.8, 128.3, 126.7, 124.8, 123.4, 49.3, 40.9, 21.3;

HRMS (ESI) *m/z*: [M + Na]<sup>+</sup> Calcd for C<sub>26</sub>H<sub>21</sub>NO<sub>3</sub>Na 418.1414; Found 418.1411.

**(*R,E*)-2-(1-(4-methoxyphenyl)-5-oxo-5-phenylpent-1-en-3-yl)isoindoline-1,3-dione (3ac)**<sup>6</sup>

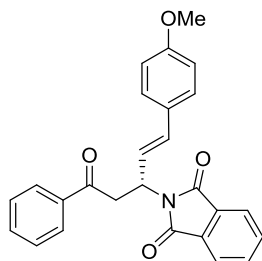

Colorless solid (16.7 mg, 41% yield); mp 50-51 °C;

HPLC (Daicel Chiralpak IC, hexane/*i*-PrOH = 60:40, flow rate 1.0 mL/min,  $\lambda$  = 254 nm)  $t_R$ (minor) = 12.7 min,  $t_R$ (major) = 14.5 min, 9.9:90.1 *e.r.*, 80% *ee*;  $[\alpha]_D^{28}$  = -6.7 (*c* 1.0, CHCl<sub>3</sub>);

<sup>1</sup>H NMR (600 MHz, CDCl<sub>3</sub>)  $\delta$  7.96-7.95 (m, 2H), 7.83-7.80 (m, 2H), 7.70-7.68 (m, 2H), 7.56-7.53 (m, 1H), 7.45-7.43 (m, 2H), 7.30 (d, *J* = 8.4 Hz, 2H), 6.82 (d, *J* = 9.0 Hz, 2H), 6.66 (d, *J* = 15.6 Hz, 1H), 6.45 (dd, *J* = 8.4, 15.6 Hz, 1H), 5.65-5.61 (m, 1H), 4.13 (dd, *J* = 9.0, 18.0 Hz, 1H), 3.79 (s, 3H), 3.63 (dd, *J* = 5.4, 17.4 Hz, 1H);

<sup>13</sup>C {<sup>1</sup>H} NMR (150 MHz, CDCl<sub>3</sub>)  $\delta$  196.9, 168.2, 159.7, 136.7, 134.1, 133.5, 132.9, 132.1, 129.0, 128.8, 128.3, 128.0, 123.7, 123.4, 114.1, 55.4, 49.3, 41.0;

HRMS (ESI) *m/z*: [M + Na]<sup>+</sup> Calcd for C<sub>26</sub>H<sub>21</sub>NO<sub>4</sub>Na 434.1363; Found

434.1363.

**(*R,E*)-2-(1-(3-fluorophenyl)-5-oxo-5-phenylpent-1-en-3-yl)isoindoline-1,3-dione  
(3ad)**

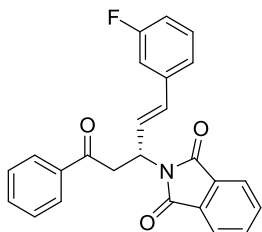

Colorless solid (39.8 mg, 99% yield); mp 120-121 °C;

HPLC (Daicel Chiralpak IB, hexane/*i*-PrOH = 80:20, flow rate 1.0 mL/min,  $\lambda$  = 254 nm)  $t_R$  (major) = 9.3 min,  $t_R$  (minor) = 10.4 min, 98.6:1.4 *e.r.*, 97% *ee*;  $[\alpha]_D^{28}$  = -8.0 (*c* 2.0, CHCl<sub>3</sub>);

<sup>1</sup>H NMR (600 MHz, CDCl<sub>3</sub>)  $\delta$  7.96 (d, *J* = 7.2 Hz, 2H), 7.85-7.82 (m, 2H), 7.71-7.69 (m, 2H), 7.56 (t, *J* = 7.2 Hz, 1H), 7.45 (t, *J* = 7.8 Hz, 2H), 7.25-7.23 (m, 1H), 7.12 (d, *J* = 7.8 Hz, 1H), 7.08-7.06 (m, 1H), 6.94-6.90 (m, 1H), 6.67 (d, *J* = 16.2 Hz, 1H), 6.59 (dd, *J* = 7.8, 15.6 Hz, 1H), 5.68-5.65 (m, 1H), 4.11 (dd, *J* = 8.4, 17.4 Hz, 1H), 3.67 (dd, *J* = 6.0, 18.0 Hz, 1H);

<sup>13</sup>C {<sup>1</sup>H} NMR (150 MHz, CDCl<sub>3</sub>)  $\delta$  196.7, 168.1, 163.1 (d, *J* = 244.5 Hz), 138.6 (d, *J* = 7.5 Hz), 136.6, 134.2, 133.6, 132.2 (d, *J* = 1.5 Hz), 132.0, 130.1 (d, *J* = 9.0 Hz), 128.8, 128.3, 127.4, 123.5, 122.7 (d, *J* = 3.0 Hz), 115.0 (d, *J* = 21.0 Hz), 113.2 (d, *J* = 21.0 Hz), 48.9, 40.8;

<sup>19</sup>F {<sup>1</sup>H} NMR (564 MHz, CDCl<sub>3</sub>)  $\delta$  -133.4;

HRMS (ESI) *m/z*: [M + Na]<sup>+</sup> Calcd for C<sub>25</sub>H<sub>18</sub>NO<sub>3</sub>FNa 422.1163; Found 422.1161.

**(*R,E*)-2-(1-(4-chlorophenyl)-5-oxo-5-phenylpent-1-en-3-yl)isoindoline-1,3-dione  
(3ae)<sup>6</sup>**

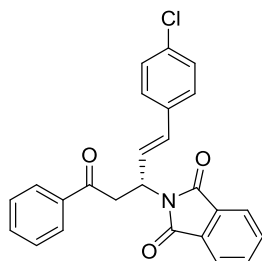

Colorless solid (41.5 mg, 99% yield); mp 136-138 °C;

HPLC (Daicel Chiralpak IB, hexane/*i*-PrOH = 80:20, flow rate 1.0 mL/min,  $\lambda$  = 254 nm)  $t_R$  (major) = 9.9 min,  $t_R$  (minor) = 12.2 min, 98.3:1.7 *e.r.*, 97% *ee*;  $[\alpha]_D^{28}$  = -7.1 (*c* 2.0, CHCl<sub>3</sub>);

$^1\text{H}$  NMR (600 MHz,  $\text{CDCl}_3$ )  $\delta$  7.96-7.95 (m, 2H), 7.84-7.82 (m, 2H), 7.71-7.69 (m, 2H), 7.57-7.54 (m, 1H), 7.46-7.43 (m, 2H), 7.30-7.24 (m, 4H), 6.65 (d,  $J = 16.2$  Hz, 1H), 6.56 (d,  $J = 8.4, 16.2$  Hz, 1H), 5.67-5.64 (m, 1H), 4.10 (dd,  $J = 8.4, 17.4$  Hz, 1H), 3.67 (dd,  $J = 6.0, 18.0$  Hz, 1H);

$^{13}\text{C}$   $\{^1\text{H}\}$  NMR (150 MHz,  $\text{CDCl}_3$ )  $\delta$  196.3, 168.1, 144.5, 134.8, 134.2, 134.1, 133.8, 132.1, 129.5, 128.9, 128.4, 128.0, 126.7, 123.5, 49.1, 40.7, 21.8;

HRMS (ESI)  $m/z$ :  $[\text{M} + \text{Na}]^+$  Calcd for  $\text{C}_{25}\text{H}_{18}\text{NO}_3\text{ClNa}$  438.0867; Found 438.0862.

**(*R,E*)-2-(1-(4-bromophenyl)-5-oxo-5-phenylpent-1-en-3-yl)isoindoline-1,3-dione (3af)**

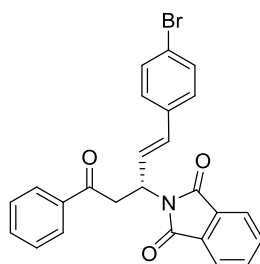

Colorless solid (45.2 mg, 98% yield); mp 131-133 °C;

HPLC (Daicel Chiralpak IF, hexane/*i*-PrOH = 80:20, flow rate 1.0 mL/min,  $\lambda = 254$  nm)  $t_R$ (major) = 20.0 min,  $t_R$ (minor) = 23.3 min, 98.8:1.2 *e.r.*, 98% *ee*;  $[\alpha]_D^{28} = +2.6$  (*c* 2.0,  $\text{CHCl}_3$ );

$^1\text{H}$  NMR (600 MHz,  $\text{CDCl}_3$ )  $\delta$  7.96- 7.95 (m, 2H), 7.84-7.82 (m, 2H), 7.72-7.69 (m, 2H), 7.57-7.54 (m, 1H), 7.46-7.40 (m, 4H), 7.24-7.22 (m, 2H), 6.64 (d,  $J = 16.2$  Hz, 1H), 6.57 (dd,  $J = 7.8, 15.6$  Hz, 1H), 5.67-5.63 (m, 1H), 4.10 (dd,  $J = 8.4, 18.0$  Hz, 1H), 3.67 (dd,  $J = 5.4, 17.4$  Hz, 1H);

$^{13}\text{C}$   $\{^1\text{H}\}$  NMR (150 MHz,  $\text{CDCl}_3$ )  $\delta$  196.7, 168.1, 136.6, 135.2, 134.2, 133.6, 132.2, 132.0, 131.8, 128.9, 128.33, 128.27, 126.7, 123.5, 122.0, 49.0, 40.8;

HRMS (ESI)  $m/z$ :  $[\text{M} + \text{Na}]^+$  Calcd for  $\text{C}_{25}\text{H}_{18}\text{NO}_3\text{BrNa}$  482.0362; Found 482.0360.

**(*R,E*)-2-(5-oxo-5-phenyl-1-(4-(trifluoromethyl)phenyl)pent-1-en-3-yl)isoindoline-1,3-dione (3ag)<sup>6</sup>**

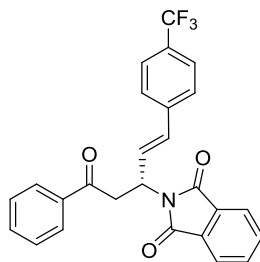

Colorless solid (44.9 mg, 99% yield); mp 106-108 °C;

HPLC (Daicel Chiralpak IF, hexane/*i*-PrOH = 80:20, flow rate 1.0 mL/min,  $\lambda$  = 254 nm)  $t_R$ (major) = 26.6 min,  $t_R$ (minor) = 29.2 min, 97.0:3.0 *e.r.*, 94% *ee*;  $[\alpha]_D^{27}$  = -10.4 (*c* 2.0, CHCl<sub>3</sub>);

<sup>1</sup>H NMR (600 MHz, CDCl<sub>3</sub>)  $\delta$  7.97-7.96 (m, 2H), 7.85-7.84 (m, 2H), 7.72-7.70 (m, 2H), 7.58-7.53 (m, 3H), 7.47-7.44 (m, 4H), 6.73 (d, *J* = 15.6 Hz, 1H), 6.67 (dd, *J* = 7.8, 16.2 Hz, 1H), 5.71-5.67 (m, 1H), 4.10 (dd, *J* = 8.4, 18.0 Hz, 1H), 3.74 (dd, *J* = 6.0, 17.4 Hz, 1H);

<sup>13</sup>C {<sup>1</sup>H} NMR (150 MHz, CDCl<sub>3</sub>)  $\delta$  196.6, 168.1, 139.7, 136.5, 134.2, 133.6, 131.98, 131.95, 129.9 (*q*, *J* = 33.0 Hz), 128.8, 128.7, 128.2, 127.0, 125.6 (*q*, *J* = 3.0 Hz), 124.2 (*q*, *J* = 270.0 Hz), 123.5, 48.9, 40.7;

<sup>19</sup>F {<sup>1</sup>H} NMR (564 MHz, CDCl<sub>3</sub>)  $\delta$  -62.58;

HRMS (ESI) *m/z*: [M + Na]<sup>+</sup> Calcd for C<sub>26</sub>H<sub>18</sub>NO<sub>3</sub>F<sub>3</sub>Na 472.1131; Found 472.1124.

**(*R*)-2-(1-(furan-2-yl)-3-oxo-3-phenylpropyl)isoindoline-1,3-dione (3ah)**

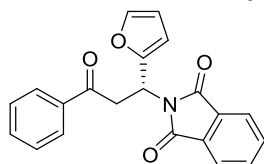

Colorless oil (34.5 mg, 99% yield);

HPLC (Daicel Chiralpak IF, hexane/*i*-PrOH = 80:20, flow rate 1.0 mL/min,  $\lambda$  = 254 nm)  $t_R$ (minor) = 17.5 min,  $t_R$ (major) = 19.5 min, 6.0:94.0 *e.r.*, 88% *ee*;  $[\alpha]_D^{28}$  = -15.3 (*c* 2.0, CHCl<sub>3</sub>);

<sup>1</sup>H NMR (600 MHz, CDCl<sub>3</sub>)  $\delta$  7.99-7.98 (m, 2H), 7.84-7.81 (m, 2H), 7.70-7.68 (m, 2H), 7.57 (t, *J* = 7.2 Hz, 1H), 7.46 (t, *J* = 7.8 Hz, 1H), 7.34 (d, *J* = 1.2 Hz, 1H), 6.37 (d, *J* = 3.6 Hz, 1H), 6.33-6.32 (m, 1H), 6.18 (dd, *J* = 5.4, 9.0 Hz, 1H), 4.40 (dd, *J* = 9.0, 18.0 Hz, 1H), 3.91 (dd, *J* = 5.4, 18.0 Hz, 1H);

<sup>13</sup>C {<sup>1</sup>H} NMR (150 MHz, CDCl<sub>3</sub>)  $\delta$  196.3, 167.9, 151.8, 142.3, 136.4, 134.2, 133.6, 132.0, 128.8, 128.3, 123.5, 110.6, 107.7, 43.9, 38.8;

HRMS (ESI) *m/z*: [M + Na]<sup>+</sup> Calcd for C<sub>21</sub>H<sub>15</sub>NO<sub>4</sub>Na 368.0893; Found 368.0895.

**(*R*)-2-(1-(benzofuran-2-yl)-3-oxo-3-phenylpropyl)isoindoline-1,3-dione (3ai)<sup>6</sup>**

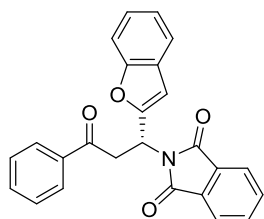

Colorless solid (39.4 mg, 99% yield); mp 108-110 °C;

HPLC (Daicel Chiralpak IF, hexane/*i*-PrOH = 70:30, flow rate 1.0 mL/min,  $\lambda$  = 254 nm)  $t_R$ (minor) = 16.1 min,  $t_R$ (major) = 20.6 min, 4.7:95.3 *e.r.*, 90% *ee*;  $[\alpha]_D^{28}$  = -1.5 (*c* 2.0, CHCl<sub>3</sub>);

<sup>1</sup>H NMR (600 MHz, CDCl<sub>3</sub>)  $\delta$  8.02-8.00 (m, 2H), 7.85-7.83 (m, 2H), 7.72-7.70 (m, 2H), 7.60-7.57 (m, 1H), 7.51-7.42 (m, 4H), 7.25-7.23 (m, 1H), 7.20-7.17 (m, 1H), 6.75 (s, 1H), 6.33-6.31 (m, 1H), 4.49 (dd, *J* = 9.0, 18.0 Hz, 1H), 4.04 (dd, *J* = 5.4, 18.6 Hz, 1H);

<sup>13</sup>C {<sup>1</sup>H} NMR (150 MHz, CDCl<sub>3</sub>)  $\delta$  196.0, 167.8, 154.8, 154.4, 136.3, 134.2, 133.7, 131.9, 128.9, 128.3, 128.2, 124.5, 123.6, 123.0, 121.2, 111.5, 104.5, 44.4, 38.7;

HRMS (ESI) *m/z*: [M + Na]<sup>+</sup> Calcd for C<sub>25</sub>H<sub>17</sub>NO<sub>4</sub>Na 418.1050; Found 418.1050.

**(*R*)-2-(3-oxo-3-phenyl-1-(thiophen-2-yl)propyl)isoindoline-1,3-dione (3aj)**

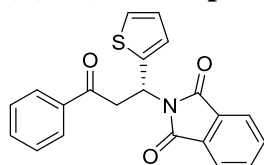

Colorless oil (32.3 mg, 90% yield);

HPLC (Daicel Chiralpak IF, hexane/*i*-PrOH = 80:20, flow rate 1.0 mL/min,  $\lambda$  = 254 nm)  $t_R$ (minor) = 18.3 min,  $t_R$ (major) = 19.5 min, 3.1:96.9 *e.r.*, 94% *ee*;  $[\alpha]_D^{28}$  = -40.2 (*c* 2.0, CHCl<sub>3</sub>);

<sup>1</sup>H NMR (600 MHz, CDCl<sub>3</sub>)  $\delta$  7.98-7.97 (m, 2H), 7.82-7.79 (m, 2H), 7.69-7.66 (m, 2H), 7.58-7.55 (m, 1H), 7.45 (t, *J* = 7.8 Hz, 2H), 7.23-7.22 (m, 2H), 6.95 (dd, *J* = 3.6, 5.4 Hz, 1H), 6.36 (dd, *J* = 5.4, 9.6 Hz, 1H), 4.58 (dd, *J* = 9.6, 18.0 Hz, 1H), 3.89 (dd, *J* = 4.8, 18.0 Hz, 1H);

<sup>13</sup>C {<sup>1</sup>H} NMR (150 MHz, CDCl<sub>3</sub>)  $\delta$  196.3, 167.9, 142.1, 136.4, 134.2, 133.7, 131.9, 128.8, 128.3, 126.9, 126.6, 125.6, 123.5, 45.6, 41.6;

HRMS (ESI) *m/z*: [M + Na]<sup>+</sup> Calcd for C<sub>21</sub>H<sub>15</sub>NO<sub>3</sub>SNa 384.0665; Found 384.0662.

**(*R*)-2-(1-(benzo[*b*]thiophen-2-yl)-3-oxo-3-phenylpropyl)isoindoline-1,3-dione (3ak)<sup>6</sup>**

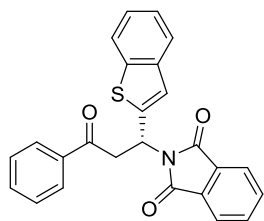

Colorless solid (37.2 mg, 91% yield); mp 127-128 °C;

HPLC (Daicel Chiralpak IC, hexane/*i*-PrOH = 80:20, flow rate 1.0 mL/min,  $\lambda$  =

254 nm)  $t_R$ (minor) = 17.9 min,  $t_R$ (major) = 19.1 min, 2.2:97.8 *e.r.*, 95% *ee*;  $[\alpha]_D^{26} = -17.8$  (*c* 2.0, CHCl<sub>3</sub>);

<sup>1</sup>H NMR (400 MHz, CDCl<sub>3</sub>)  $\delta$  8.01-7.98 (m, 2H), 7.83-7.81 (m, 2H), 7.76-7.67 (m, 4H), 7.59-7.55 (m, 1H), 7.48-7.43 (m, 3H), 7.33-7.26 (m, 2H), 6.43 (dd, *J* = 5.2, 8.8 Hz, 1H), 4.60 (dd, *J* = 9.2, 18.0 Hz, 1H), 4.00 (dd, *J* = 5.2, 18.0 Hz, 1H);

<sup>13</sup>C {<sup>1</sup>H} NMR (150 MHz, CDCl<sub>3</sub>)  $\delta$  196.2, 168.0, 142.7, 139.7, 139.3, 136.4, 134.3, 133.7, 131.9, 128.9, 128.3, 124.8, 124.6, 123.9, 123.6, 123.1, 122.4, 46.3, 41.2;

HRMS (ESI) *m/z*: [M + Na]<sup>+</sup> Calcd for C<sub>25</sub>H<sub>17</sub>NO<sub>3</sub>SNa 434.0821; Found 434.0818.

### (*R,E*)-2-(1-oxo-1-phenylundec-4-en-3-yl)isoindoline-1,3-dione (3al)

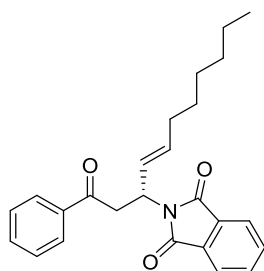

Colorless oil (24.0 mg, 62% yield);

HPLC (Daicel Chiralpak IF, hexane/*i*-PrOH = 80:20, flow rate 1.0 mL/min,  $\lambda$  = 254 nm)  $t_R$ (minor) = 10.4 min,  $t_R$ (major) = 11.0 min, 0.8:99.2 *e.r.*, 98% *ee*;  $[\alpha]_D^{29} = -32.7$  (*c* 2.0, CHCl<sub>3</sub>);

<sup>1</sup>H NMR (600 MHz, CDCl<sub>3</sub>)  $\delta$  7.95-7.93 (m, 2H), 7.82-7.79 (m, 2H), 7.67-7.66 (m, 2H), 7.55-7.53 (m, 1H), 7.45-7.42 (m, 2H), 5.86-5.75 (m, 2H), 5.46-5.42 (m, 1H), 4.02 (dd, *J* = 8.4, 17.4 Hz, 1H), 3.52 (dd, *J* = 6.0, 17.4 Hz, 1H), 2.00 (q, *J* = 7.2 Hz, 2H), 1.34-1.23 (m, 8H), 0.85-0.83 (m, 3H);

<sup>13</sup>C {<sup>1</sup>H} NMR (150 MHz, CDCl<sub>3</sub>)  $\delta$  197.1, 168.1, 136.8, 135.0, 134.0, 133.4, 132.1, 128.8, 128.2, 126.4, 123.3, 49.1, 40.9, 32.2, 31.7, 28.92, 28.89, 22.7, 14.2;

HRMS (ESI) *m/z*: [M + Na]<sup>+</sup> Calcd for C<sub>25</sub>H<sub>27</sub>NO<sub>3</sub>Na 412.1883; Found 412.1884.

### (*R*)-2-(5-methyl-1-oxo-1-phenylhex-4-en-3-yl)isoindoline-1,3-dione (3am)

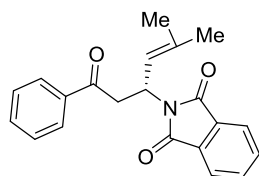

Colorless oil (24.6 mg, 74% yield);

HPLC (Daicel Chiralpak IA, hexane/*i*-PrOH = 90:10, flow rate 1.0 mL/min,  $\lambda$  = 254 nm)  $t_R$ (major) = 14.1 min,  $t_R$ (minor) = 15.1 min, 88.1:11.9 *e.r.*, 76% *ee*;  $[\alpha]_D^{26} =$

-28.4 (*c* 2.0, CHCl<sub>3</sub>);

<sup>1</sup>H NMR (600 MHz, CDCl<sub>3</sub>) δ 7.95-7.93 (m, 2H), 7.81-7.78 (m, 2H), 7.68-7.65 (m, 2H), 7.55-7.52 (m, 1H), 7.43 (t, *J* = 7.8 Hz, 2H), 5.73-5.67 (m, 2H), 3.95 (dd, *J* = 7.8, 17.4 Hz, 1H), 3.50 (dd, *J* = 5.4, 17.4 Hz, 1H), 1.81 (s, 3H), 1.71 (s, 3H);

<sup>13</sup>C {<sup>1</sup>H} NMR (150 MHz, CDCl<sub>3</sub>) δ 197.4, 168.2, 137.3, 136.8, 133.9, 133.4, 132.2, 128.8, 128.2, 123.3, 121.9, 45.2, 41.4, 25.8, 18.4;

HRMS (ESI) *m/z*: [M + Na]<sup>+</sup> Calcd for C<sub>21</sub>H<sub>19</sub>NO<sub>3</sub>Na 356.1257; Found 356.1256.

## 5. Large-scale reaction and synthetic transformations of products

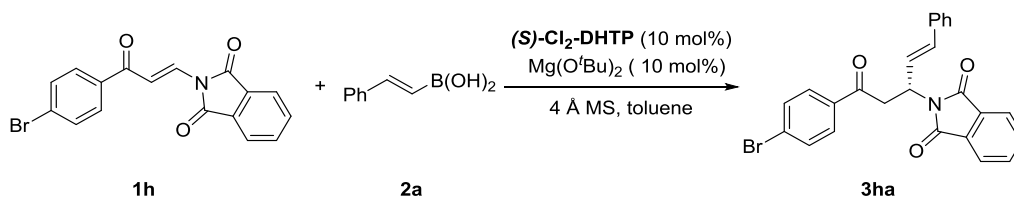

To a 100 mL Schlenk tube equipped with a stirring bar was added 4 Å MS (2.5 g), and the tube was flamed-dried under high vacuum. After cooling to r.t., the tube was then backed-filled with nitrogen. Then boronic acid **2a** (5.0 mmol, 2 equiv), **Cat 1** [(*S*)-2,15-Cl<sub>2</sub>-DHTP] (0.25 mmol, 10 mol %), β-aminoenones **1h** (2.5 mmol, 1.0 equiv), and dry toluene (25.0 mL) were successively added to the test tube under N<sub>2</sub>. The tube was capped, sealed and allowed to stir at 25 °C for 48 h. After the removal of solvents via rotary evaporation, the residue was purified through flash column chromatography on silica gel (eluent: petroleum ether/ethyl acetate = 8:1–5:1) to give pure adduct **3ha** (1.03 g, 90% yield, 97% *ee*).

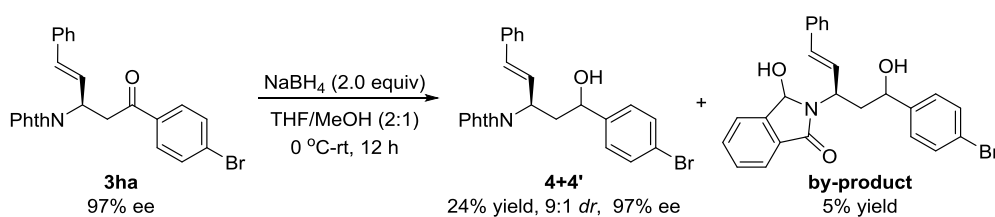

An oven-dried 10 mL Schlenk tube equipped with a stirring bar and capped with a rubber septum was charged with **3ha** (97% *ee*, 46.0 mg, 0.1 mmol, 1 equiv). The tube was degassed and backfilled with N<sub>2</sub> (3 times). THF (2 mL) and MeOH (1 mL) was added into the tube via a syringe. The reaction mixture was cooled down to 0 °C, and NaBH<sub>4</sub> (0.2 mmol, 2.0 equiv) was added slowly. The reaction mixture was stirred at 0 °C for 1 h under N<sub>2</sub> atmosphere, and stirred at room temperature for 11 h. The resulting mixture was quenched by the addition of H<sub>2</sub>O (2.0 mL). The resulting mixture was extracted with ethyl acetate (10 mL×3). The combined organic layers were then washed with brine and dried over anhydrous Na<sub>2</sub>SO<sub>4</sub> and concentrated *in*



*vacuo*. The residue was purified through flash column chromatography on silica gel (eluent: petroleum ether/ethyl acetate = 5:1) to give product **4** and **4'** (10.9 mg, 24% yield, 9:1 *dr*, 97% *ee*), and by-product (2.3 mg, 5% yield). The compound **4** and **4'** cannot be separated by flash column chromatography on silica gel or prepared thin layer chromatography.

2-((3*R*,*E*)-5-(4-bromophenyl)-5-hydroxy-1-phenylpent-1-en-3-yl)isoindoline-1,3-dione (**4** and **4'**)

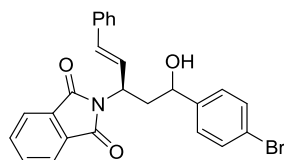

Colorless solid (10.9 mg, 9:1 *dr*; 97% *ee*); mp 63-65 °C;

Major isomer:

HPLC (Daicel Chiralpak IA, hexane/*i*-PrOH = 80:20, flow rate 1.0 mL/min,  $\lambda$  = 254 nm)  $t_R$  (major) = 17.5 min,  $t_R$  (minor) = 27.9 min, 97% *ee*;  $[\alpha]_D^{17}$  = +6.1 (*c* 0.8, CHCl<sub>3</sub>);

<sup>1</sup>H NMR (400 MHz, CDCl<sub>3</sub>)  $\delta$  7.81-7.77 (m, 2H), 7.70-7.67 (m, 2H), 7.39-7.18 (m, 9H), 6.69-6.62 (m, 2H), 5.21 (q, *J* = 4.8 Hz, 1H), 4.79 (dd, *J* = 2.4, 5.6 Hz, 1H), 2.56-2.53 (m, 1H), 2.46-2.41 (m, 1H);

<sup>13</sup>C {<sup>1</sup>H} NMR (100 MHz, CDCl<sub>3</sub>)  $\delta$  168.3, 143.1, 136.3, 134.1, 133.9, 132.1, 131.7, 128.7, 128.2, 127.5, 126.8, 126.2, 123.3, 121.5, 71.4, 51.0, 41.1;

HRMS (ESI) *m/z*: [M + Na]<sup>+</sup> Calcd for C<sub>25</sub>H<sub>20</sub>NO<sub>3</sub>BrNa 484.0519; Found 484.0495.

2-((3*R*,*E*)-5-(4-bromophenyl)-5-hydroxy-1-phenylpent-1-en-3-yl)-3-hydroxyisoindolin-1-one (**by-product**)

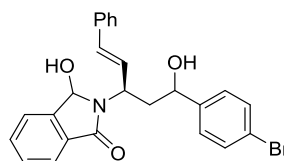

Colorless oil (2.3 mg, 5% yield);

<sup>1</sup>H NMR (400 MHz, CDCl<sub>3</sub>)  $\delta$  7.81-7.80 (m, 1H), 7.62-7.53 (m, 3H), 7.44-7.25 (m, 11H), 6.70 (d, *J* = 10.8 Hz, 1H), 6.51 (dd, *J* = 5.2, 10.8 Hz, 1H), 6.09 (d, *J* = 6.4 Hz, 1H), 5.25-5.22 (m, 1H), 4.74 (d, *J* = 6.8 Hz, 1H), 4.44 (s, 1H), 2.74 (d, *J* = 7.2 Hz, 1H), 2.47-2.42 (m, 1H), 2.13-2.04 (m, 1H);

<sup>13</sup>C {<sup>1</sup>H} NMR (100 MHz, CDCl<sub>3</sub>)  $\delta$  168.8, 144.0, 143.1, 136.2, 134.3, 132.9, 131.6, 131.2, 130.4, 128.9, 128.4, 127.6, 126.8, 126.6, 123.9, 123.2, 121.1, 82.0, 69.6, 51.4, 44.4;

HRMS (ESI)  $m/z$ :  $[M + Na]^+$  Calcd for  $C_{25}H_{22}NO_3BrNa$  486.0675; Found 486.0674.

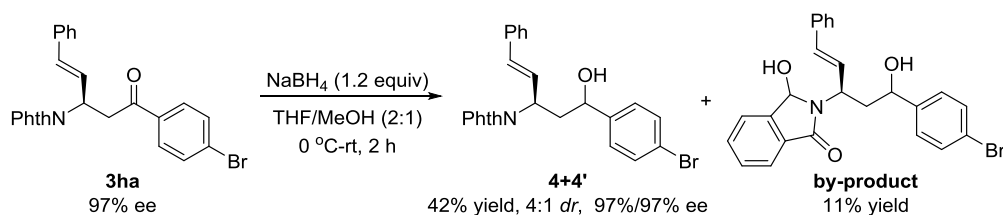

An oven-dried 10 mL Schlenk tube equipped with a stirring bar and capped with a rubber septum was charged with **3ha** (97% ee, 23.0 mg, 0.05 mmol, 1 equiv). The tube was degassed and backfilled with  $N_2$  (3 times). THF (2 mL) and MeOH (1 mL) was added into the tube via a syringe. The reaction mixture was cooled down to 0 °C, and  $NaBH_4$  (0.06 mmol, 1.2 equiv) was added slowly. The reaction mixture was stirred at 0 °C for 1 h under  $N_2$  atmosphere, and stirred at room temperature for 1 h. The resulting mixture was quenched by the addition of  $H_2O$  (2.0 mL). The resulting mixture was extracted with ethyl acetate (10 mL $\times$ 3). The combined organic layers were then washed with brine and dried over anhydrous  $Na_2SO_4$  and concentrated *in vacuo*. The residue was purified through flash column chromatography on silica gel (eluent: petroleum ether/ethyl acetate = 5:1) to give product **4** and **4'** (9.6 mg, 42% yield, 4:1 dr, 97%/97% ee), and by-product (2.6 mg, 11% yield). The compound **4** and **4'** cannot be separated by flash column chromatography on silica gel or prepared thin layer chromatography.

2-((3*R*,*E*)-5-(4-bromophenyl)-5-hydroxy-1-phenylpent-1-en-3-yl)isoindoline-1,3-dione (**4** and **4'** 4:1 dr)

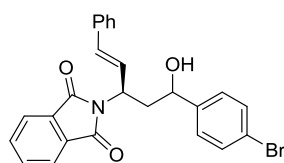

HPLC (Daicel Chiralpak IA, hexane/*i*-PrOH = 80:20, flow rate 1.0 mL/min,  $\lambda$  = 254 nm)  $t_R$ (1) = 17.4 min,  $t_R$ (2) = 23.5 min,  $t_R$ (3) = 28.2 min,  $t_R$ (4) = 30.9 min, 4:1 dr, 97% / 97% ee.

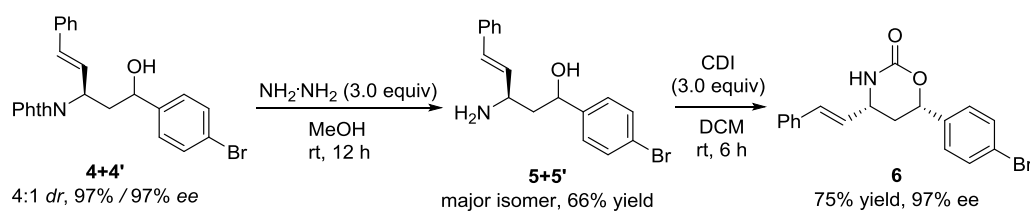

To a stirring of compound **4** and **4'** (4:1 dr, 97% / 97% ee, 9.3 mg, 0.02 mmol, 1 equiv) in MeOH (1 mL),  $NH_2NH_2$  (0.06 mmol, 3.0 equiv) was added. The reaction mixture was stirred at room temperature for 12 h. After the removal of solvents via

rotary evaporation, the residue was purified through flash column chromatography on silica gel (eluent: DCM/MeOH = 20:1) and prepared thin layer chromatography (eluent: DCM/MeOH = 10:1) to give the major isomer of product **5** (4.4 mg, 66% yield). The compound **5** and **5'** can be separated by prepared thin layer chromatography.

(*1S,3R,E*)-3-amino-1-(4-bromophenyl)-5-phenylpent-4-en-1-ol (major)

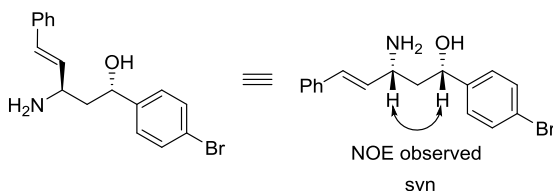

Colorless oil (4.4 mg, 66% yield);

$^1\text{H}$  NMR (400 MHz,  $\text{CDCl}_3$ )  $\delta$  7.46-7.44 (m, 2H), 7.35-7.22 (m, 7H), 6.46 (d,  $J$  = 16.0 Hz, 1H), 6.17 (dd,  $J$  = 6.8, 16.0 Hz, 1H), 4.97 (dd,  $J$  = 2.0, 10.4 Hz, 1H), 3.83-3.79 (m, 1H), 1.93-1.88 (m, 1H), 1.71-1.62 (m, 1H);

$^{13}\text{C}$   $\{^1\text{H}\}$  NMR (150 MHz,  $\text{CDCl}_3$ )  $\delta$  144.1, 136.6, 131.5, 129.0, 128.8, 127.9, 127.6, 126.5, 121.0, 74.7, 55.0, 44.9;

HRMS (ESI)  $m/z$ :  $[\text{M} + \text{Na}]^+$  Calcd for  $\text{C}_{17}\text{H}_{18}\text{NO}_3\text{BrNa}$  354.0464; Found 354.0450.

To a solution of **5** (8.3 mg, 0.025 mmol, 1 equiv) in DCM (1 mL) was added CDI (0.075 mmol, 3.0 equiv) at room temperature. After stirring for 6 h, the reaction mixture was quenched by the addition of  $\text{H}_2\text{O}$  (1.0 mL). The resulting mixture was extracted with ethyl acetate (5 mL $\times$ 3). The combined organic layers were then washed with 1N HCl and brine, dried over anhydrous  $\text{Na}_2\text{SO}_4$  and concentrated *in vacuo*. The residue was purified through flash column chromatography on silica gel (eluent: petroleum ether/ethyl acetate = 2:1) to give product **6** (6.7 mg, 75% yield, 97% *ee*).

(*4R,6S*)-6-(4-bromophenyl)-4-((*E*)-styryl)-1,3-oxazinan-2-one (**6**)

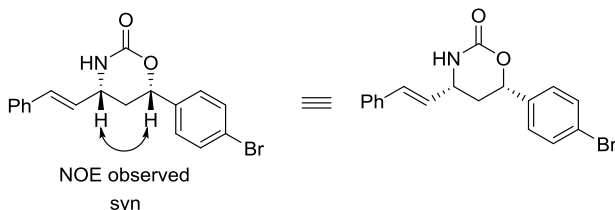

Colorless solid (6.7 mg, 75% yield); mp 188-190  $^\circ\text{C}$ ;

HPLC (Daicel Chiralpak IF, hexane/*i*-PrOH = 60:40, flow rate 1.0 mL/min,  $\lambda$  = 254 nm)  $t_R$ (minor) = 10.1 min,  $t_R$ (major) = 12.6 min, 1.7:98.3 *e.r.*, 97% *ee*;  $[\alpha]_{\text{D}}^{19}$  = -16.4 (*c* 0.3,  $\text{CHCl}_3$ );

$^1\text{H}$  NMR (400 MHz,  $\text{CDCl}_3$ )  $\delta$  7.55-7.51 (m, 2H), 7.38-7.28 (m, 7H), 6.65 (d,  $J$  = 15.6 Hz, 1H), 6.06 (dd,  $J$  = 8.0, 15.6 Hz, 1H), 5.32 (dd,  $J$  = 2.0, 11.6 Hz, 1H), 5.23 (s, 1H), 4.38-4.32 (m, 1H), 2.34-2.28 (m, 1H), 1.97-1.88 (m, 1H);

$^{13}\text{C}$   $\{^1\text{H}\}$  NMR (100 MHz,  $\text{CDCl}_3$ )  $\delta$  153.4, 137.7, 135.6, 133.5, 132.0, 129.0, 128.7, 127.7, 127.6, 126.8, 122.8, 54.2, 36.7, 29.9;

HRMS (ESI)  $m/z$ :  $[\text{M} + \text{Na}]^+$  Calcd for  $\text{C}_{18}\text{H}_{16}\text{NO}_2\text{BrNa}$  380.0257; Found 380.0242.

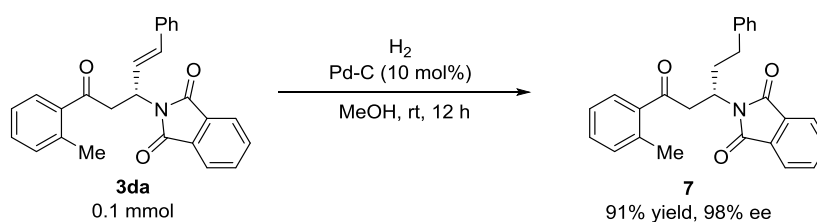

To a stirred solution of **3da** (98% *ee*, 39.5 mg, 0.1 mmol, 1 equiv) in MeOH (2 mL) was added Pd-C (0.01 mmol, 10 mol %). The reaction mixture was stirred under  $\text{H}_2$  balloon for 24 h at room temperature. The resulting mixture was filtered through a Celite pad and solvents were concentrated via rotary evaporation. The residue was purified through flash column chromatography on silica gel (eluent: petroleum ether/ethyl acetate = 10:1) to give product **7** (36.3 mg, 91% yield, 98% *ee*).

(*S*)-2-(1-oxo-5-phenyl-1-(*o*-tolyl)pentan-3-yl)isoindoline-1,3-dione (**7**)

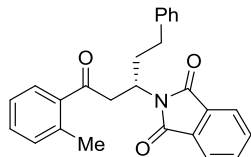

Colorless oil (36.3 mg, 91% yield);

HPLC (Daicel Chiralpak IB, hexane/*i*-PrOH = 80:20, flow rate 1.0 mL/min,  $\lambda$  = 254 nm)  $t_R$  (major) = 6.6 min,  $t_R$  (minor) = 7.6 min, 99.2:0.8 *e.r.*, 98% *ee*;  $[\alpha]_D^{17} = +2.4$  (*c* 1.0,  $\text{CHCl}_3$ );

$^1\text{H}$  NMR (400 MHz,  $\text{CDCl}_3$ )  $\delta$  7.79-7.60 (m, 5H), 7.33-7.03 (m, 8H), 4.96-4.91 (m, 1H), 3.87-3.80 (m, 1H), 3.40-3.34 (m, 1H), 2.74-2.49 (m, 3H), 2.40 (s, 3H), 2.13-2.06 (m, 1H);

$^{13}\text{C}$   $\{^1\text{H}\}$  NMR (100 MHz,  $\text{CDCl}_3$ )  $\delta$  201.3, 168.6, 141.0, 138.4, 137.6, 134.0, 132.1, 131.9, 131.6, 128.8, 128.5, 128.4, 126.0, 125.9, 123.3, 47.9, 44.0, 34.1, 33.1, 21.3;

HRMS (ESI)  $m/z$ :  $[\text{M} + \text{Na}]^+$  Calcd for  $\text{C}_{26}\text{H}_{23}\text{NO}_3\text{Na}$  420.1570; Found 420.1563.

## 6. References

- [1] (a) Chai, G.-L.; Zhu, B.; Chang, J. *J. Org. Chem.* **2019**, *84*, 120–127; (b) Chai, G.-L.; Han, J.-W.; Wong, H. N. C. *Synthesis* **2017**, *49*, 181–187.
- [2] (a) Han, Y.-Q.; Ding, Y.; Zhou, T.; Yan, S.-Y.; Song, H.; Shi, B.-F. *J. Am. Chem. Soc.* **2019**, *141*, 4558–4563. (b) Tong, H.-R.; Zheng, W.; Lv, X.; He, G.; Liu, P.; Chen, G. *ACS Catal.* **2020**, *10*, 114–120.
- [3] (a) Rong, J.; Li, H.; Fu, R.; Sun, W.; Loh, T.-P.; Jiang, Y. *ACS Catal.* **2020**, *10*, 3664–3669; (b) Wang, J.-F.; Meng, X.; Zhang, C.-H.; Yu, C.-M.; Mao, B. *Org. Lett.* **2020**, *22*, 7427–7432; (c) Sundstrom, S.; Nguyen, T. S.; May, J. A. *Org. Lett.* **2020**, *22*, 1355–1359.
- [4] (a) Trubitsin, D.; Martonova, J.; Kudrjashova, M.; Erkman, K.; Jarving, I.; Kanger, T. *Org. Lett.* **2021**, *23*, 1820–1824; (b) Liang, G.; Rong, J.; Sun, W.; Chen, G.; Jiang, Y.; Loh, T.-P. *Org. Lett.* **2018**, *20*, 7326–7331.
- [5] Ma, Y.; Reddy, B. R. P.; Bi, X. *Org. Lett.* **2019**, *21*, 9860–9863.
- [6] Mao, B.; Tong, M.; Wang, J.; Bai, X.; Chen, Z.; Zhu, X.; Yu, C. Method for catalyzing asymmetric synthesis of chiral  $\beta$ -aminoketone derivative. CN 109748841 (China Patent).
- [7] Ding, W.; Hu, J.; Jin, H.; Yu, X.; Wang, S. *Synthesis* **2018**, *50*, 107–118.
- [8] Roscales, S.; Rincón, Á.; Buxaderas, E.; Csáky, A. G. *Tetrahedron Lett.* **2012**, *53*, 4721–4724.

## 7. X-ray crystallography data

The absolute configuration of product **3af** was determined by an X-ray chromatography analysis

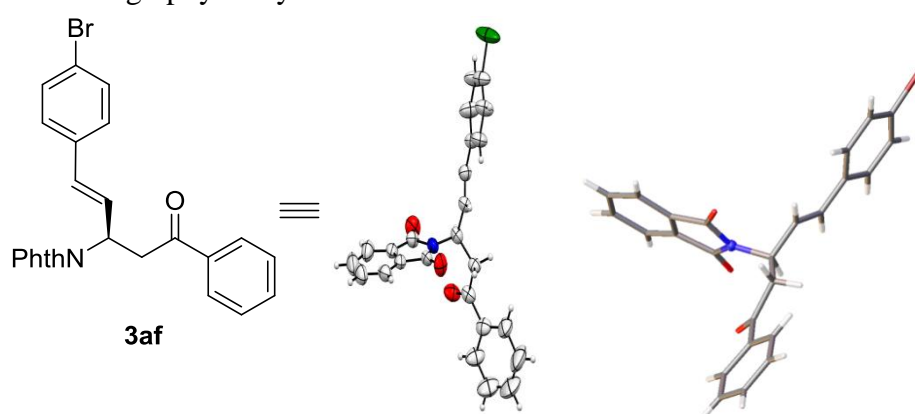

ORTEP view with displacement ellipsoids drawn at 50% probability level. Single crystal of **3af** was obtained by recrystallization in DCM, hexane and <sup>i</sup>PrOH;

CCDC (2126742) contains the supplementary crystallographic data which can be obtained free of charge from The Cambridge Crystallographic Data Centre.

### Crystal data and structure refinement for compound 3af.

|                                             |                                                               |
|---------------------------------------------|---------------------------------------------------------------|
| Identification code                         | yez-20211130                                                  |
| Empirical formula                           | C <sub>25</sub> H <sub>18</sub> BrNO <sub>3</sub>             |
| Formula weight                              | 460.31                                                        |
| Temperature/K                               | 293(2)                                                        |
| Crystal system                              | monoclinic                                                    |
| Space group                                 | P2 <sub>1</sub>                                               |
| a/Å                                         | 10.61630(10)                                                  |
| b/Å                                         | 9.85540(10)                                                   |
| c/Å                                         | 10.88780(10)                                                  |
| α /°                                        | 90                                                            |
| β /°                                        | 105.5520(10)                                                  |
| γ /°                                        | 90                                                            |
| Volume/Å <sup>3</sup>                       | 1097.460(19)                                                  |
| Z                                           | 2                                                             |
| ρ <sub>calc</sub> /cm <sup>3</sup>          | 1.393                                                         |
| μ /mm <sup>-1</sup>                         | 2.760                                                         |
| F(000)                                      | 468.0                                                         |
| Crystal size/mm <sup>3</sup>                | 0.3 × 0.2 × 0.1                                               |
| Radiation                                   | CuKα (λ = 1.54184)                                            |
| 2θ range for data collection/°              | 8.43 to 143.074                                               |
| Index ranges                                | -13 ≤ h ≤ 13, -11 ≤ k ≤ 12, -13 ≤ l ≤ 13                      |
| Reflections collected                       | 33241                                                         |
| Independent reflections                     | 4019 [R <sub>int</sub> = 0.0430, R <sub>sigma</sub> = 0.0198] |
| Data/restraints/parameters                  | 4019/1/271                                                    |
| Goodness-of-fit on F <sup>2</sup>           | 1.090                                                         |
| Final R indexes [I ≥ 2σ (I)]                | R <sub>1</sub> = 0.0626, wR <sub>2</sub> = 0.1689             |
| Final R indexes [all data]                  | R <sub>1</sub> = 0.0640, wR <sub>2</sub> = 0.1708             |
| Largest diff. peak/hole / e Å <sup>-3</sup> | 0.75/-1.11                                                    |
| Flack parameter                             | -0.006(11)                                                    |

## 8. Copies of $^1\text{H}$ , $^{13}\text{C}$ , and $^{19}\text{F}$ NMR spectra

(*E*)-2-(3-oxo-3-(*p*-tolyl)prop-1-en-1-yl)isoindoline-1,3-dione (**1b**)

$^1\text{H}$  NMR (600 MHz,  $\text{CDCl}_3$ )

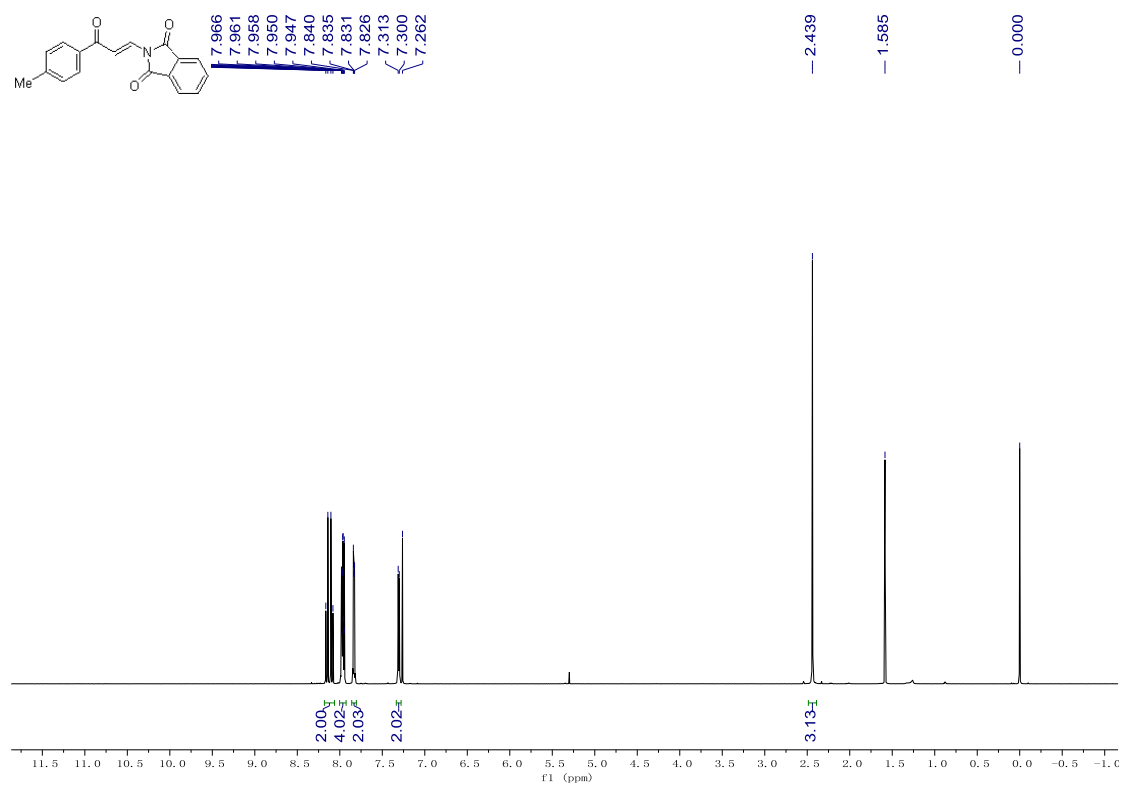

$^{13}\text{C}$  { $^1\text{H}$ } NMR (100 MHz,  $\text{CDCl}_3$ )

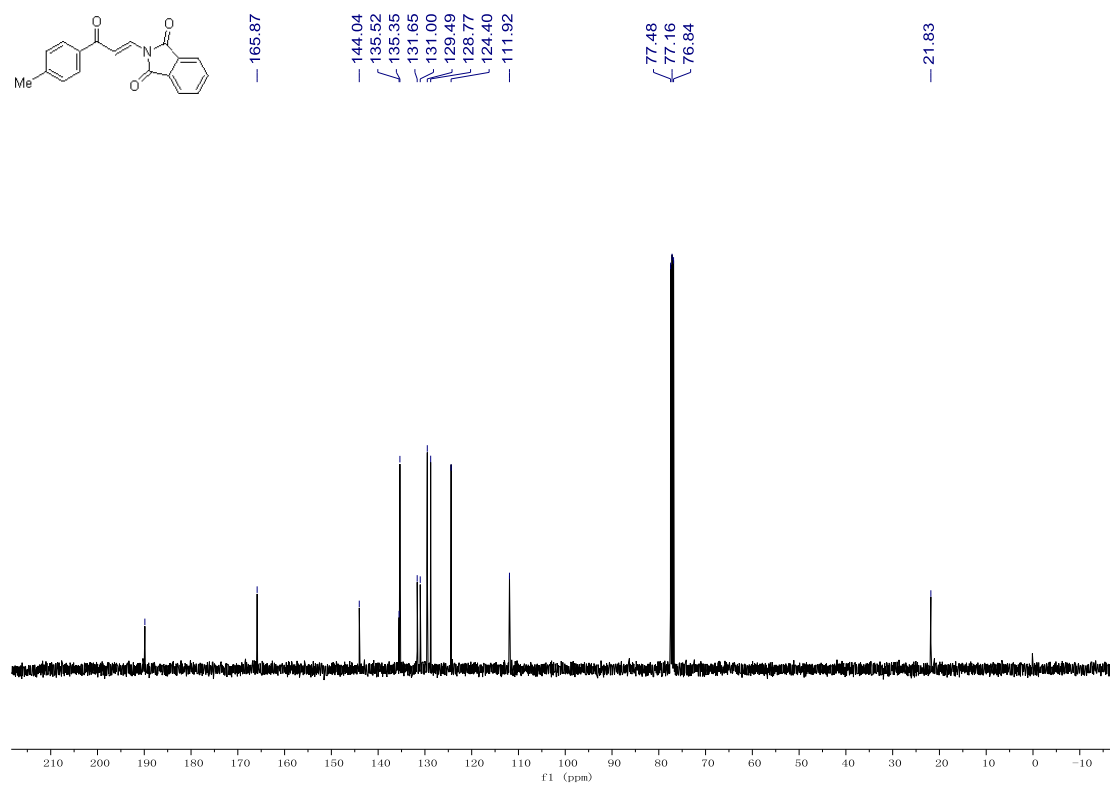

(*E*)-2-(3-oxo-3-(*m*-tolyl)prop-1-en-1-yl)isoindoline-1,3-dione (**1c**)

$^1\text{H}$  NMR (600 MHz,  $\text{CDCl}_3$ )

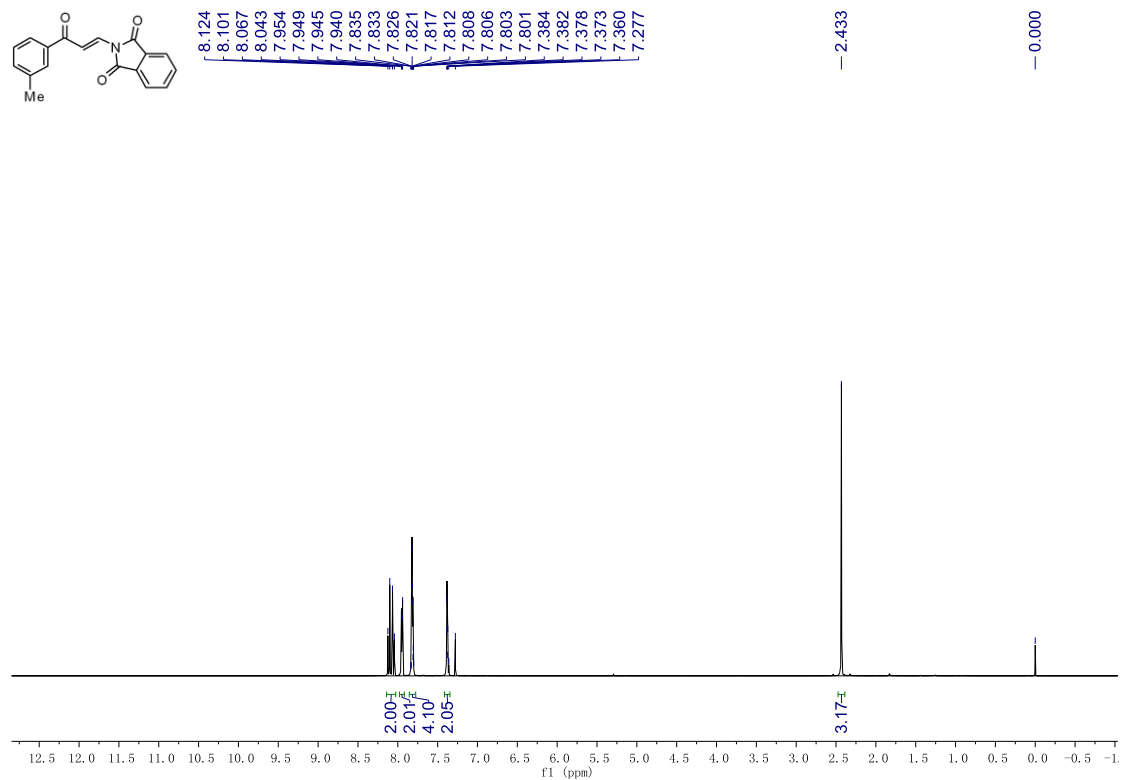

$^{13}\text{C}$  { $^1\text{H}$ } NMR (150 MHz,  $\text{CDCl}_3$ )

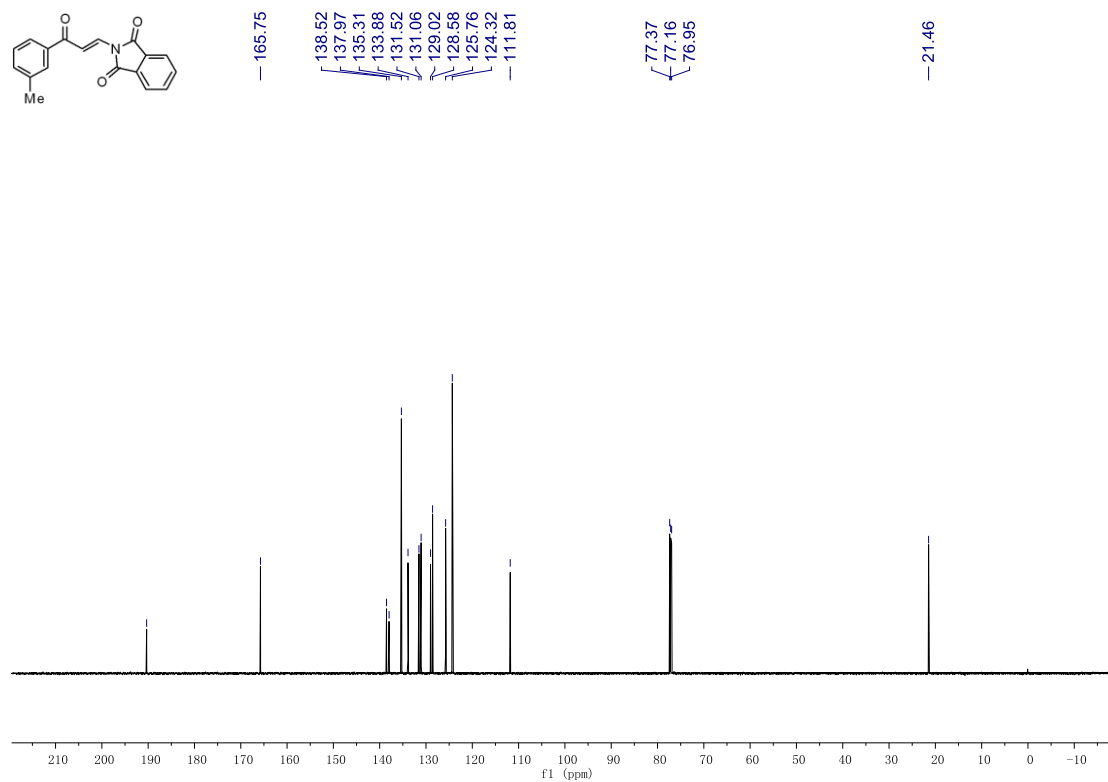



(*E*)-2-(3-oxo-3-(*o*-tolyl)prop-1-en-1-yl)isoindoline-1,3-dione (**1d**)

$^1\text{H}$  NMR (400 MHz,  $\text{CDCl}_3$ )

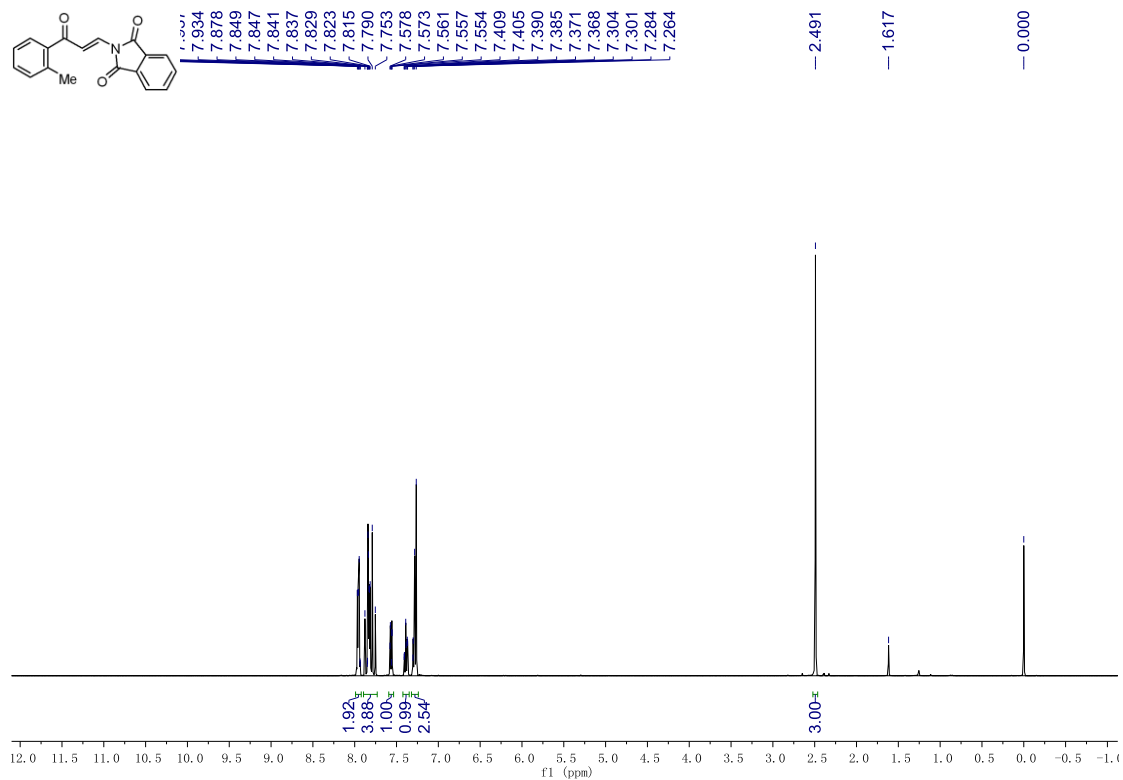

$^{13}\text{C}$  { $^1\text{H}$ } NMR (100 MHz,  $\text{CDCl}_3$ )

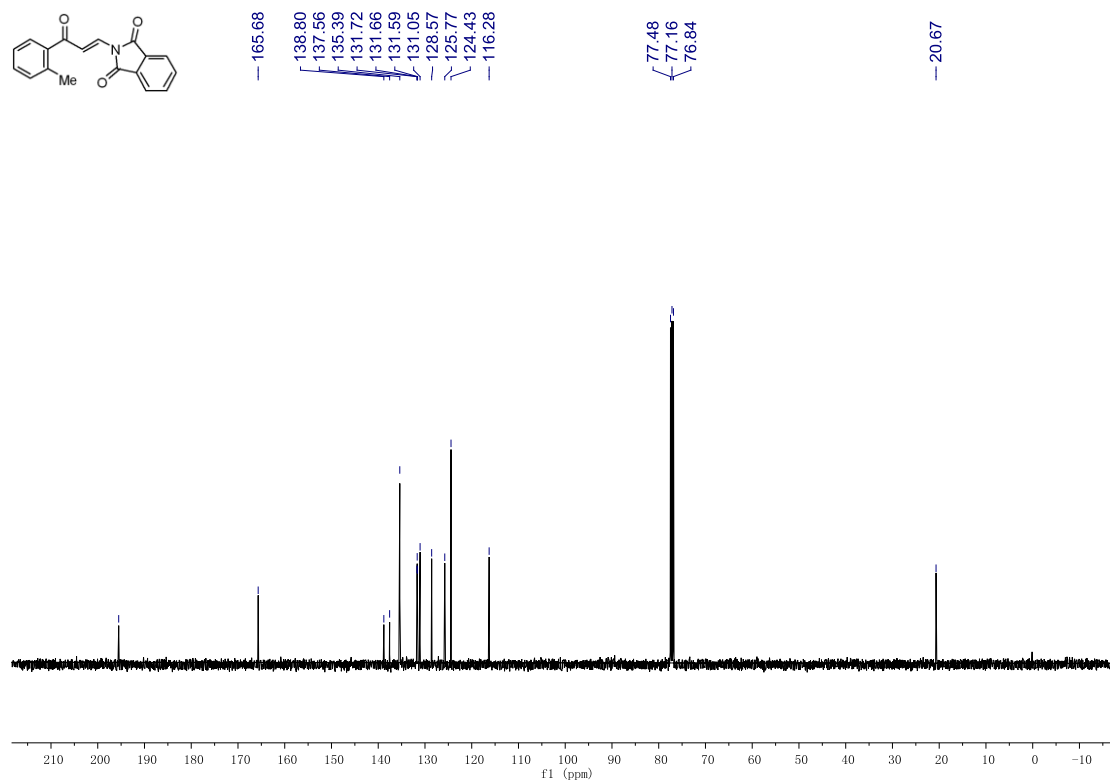

(E)-2-(3-(4-chlorophenyl)-3-oxoprop-1-en-1-yl)isoindoline-1,3-dione (**1g**)

$^1\text{H}$  NMR (400 MHz,  $\text{CDCl}_3$ )

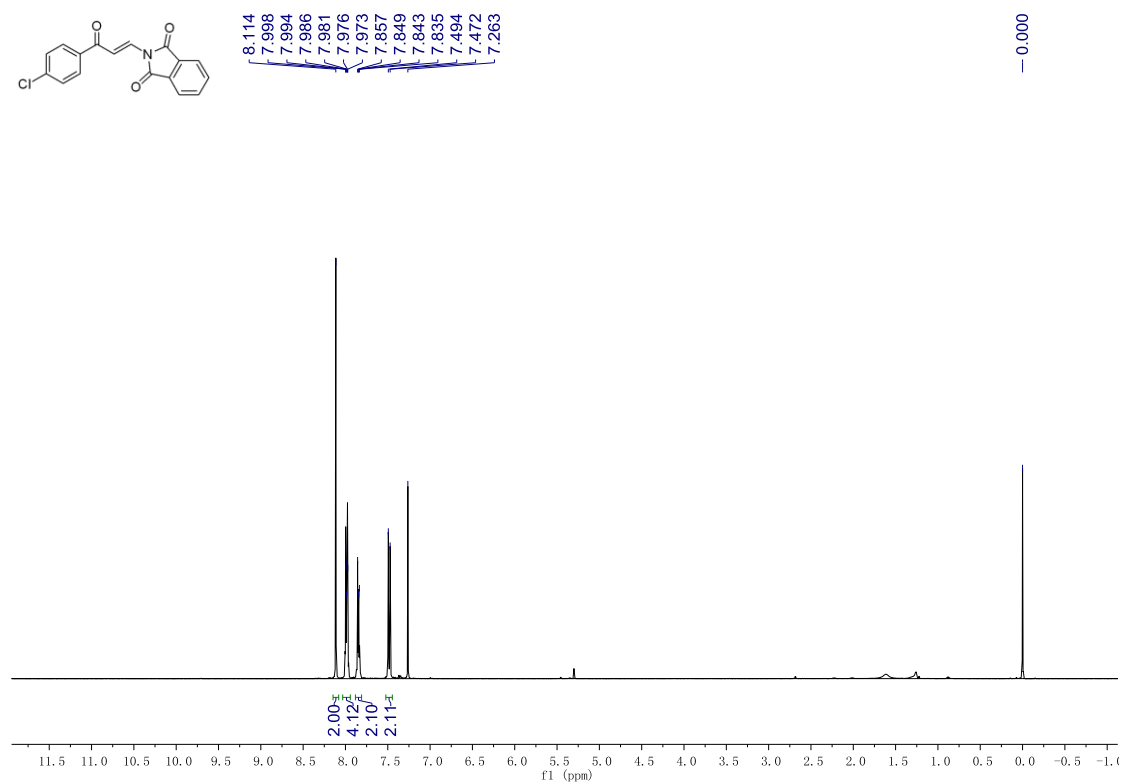

$^{13}\text{C}$  { $^1\text{H}$ } NMR (150 MHz,  $\text{CDCl}_3$ )

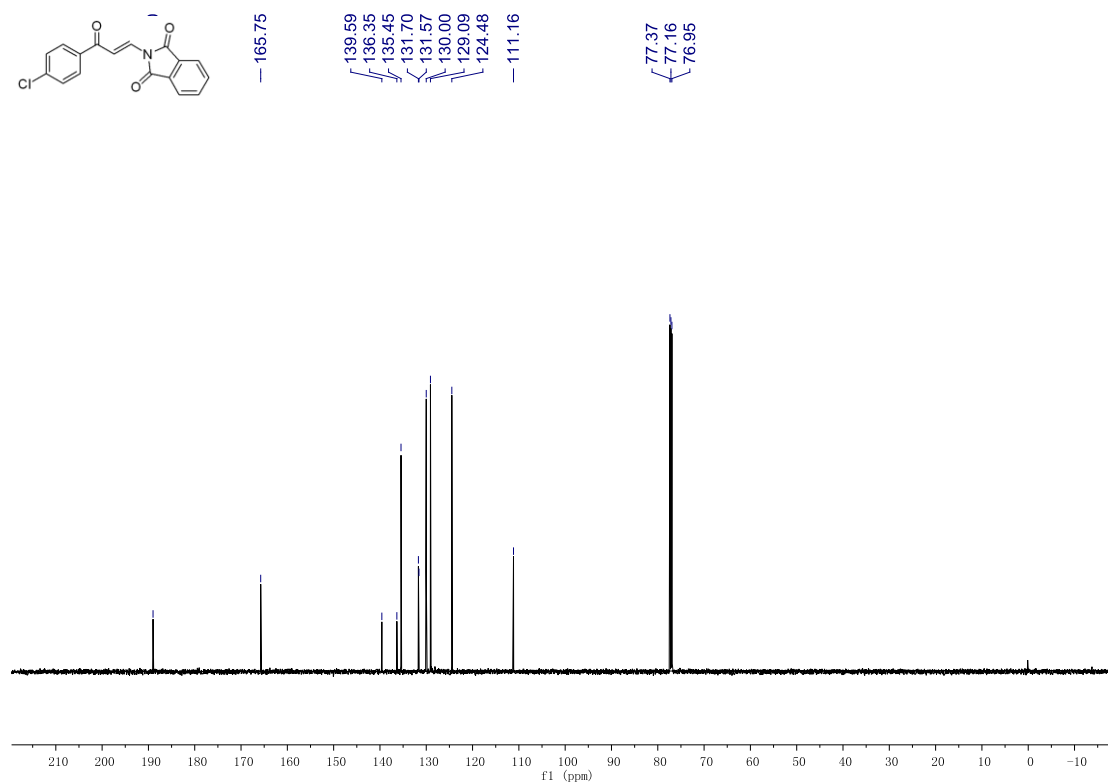

(E)-2-(3-(4-bromophenyl)-3-oxoprop-1-en-1-yl)isoindoline-1,3-dione (**1h**)

$^1\text{H}$  NMR (600 MHz,  $\text{CDCl}_3$ )

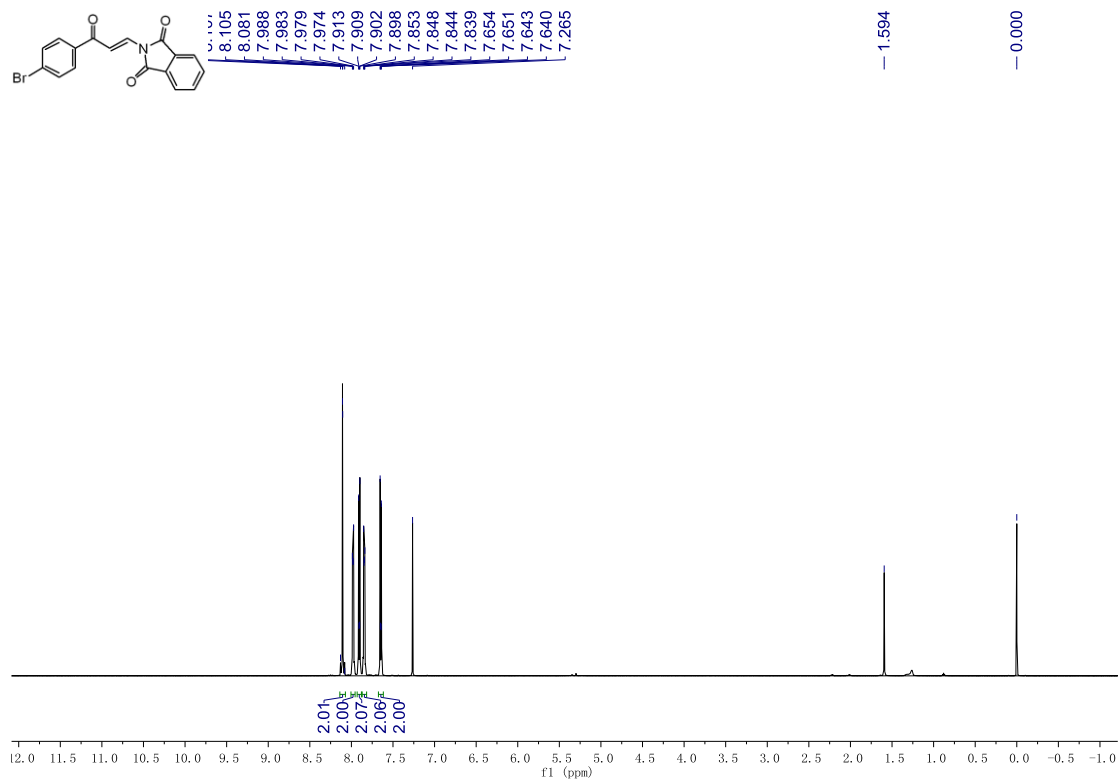

$^{13}\text{C}$  { $^1\text{H}$ } NMR (100 MHz,  $\text{CDCl}_3$ )

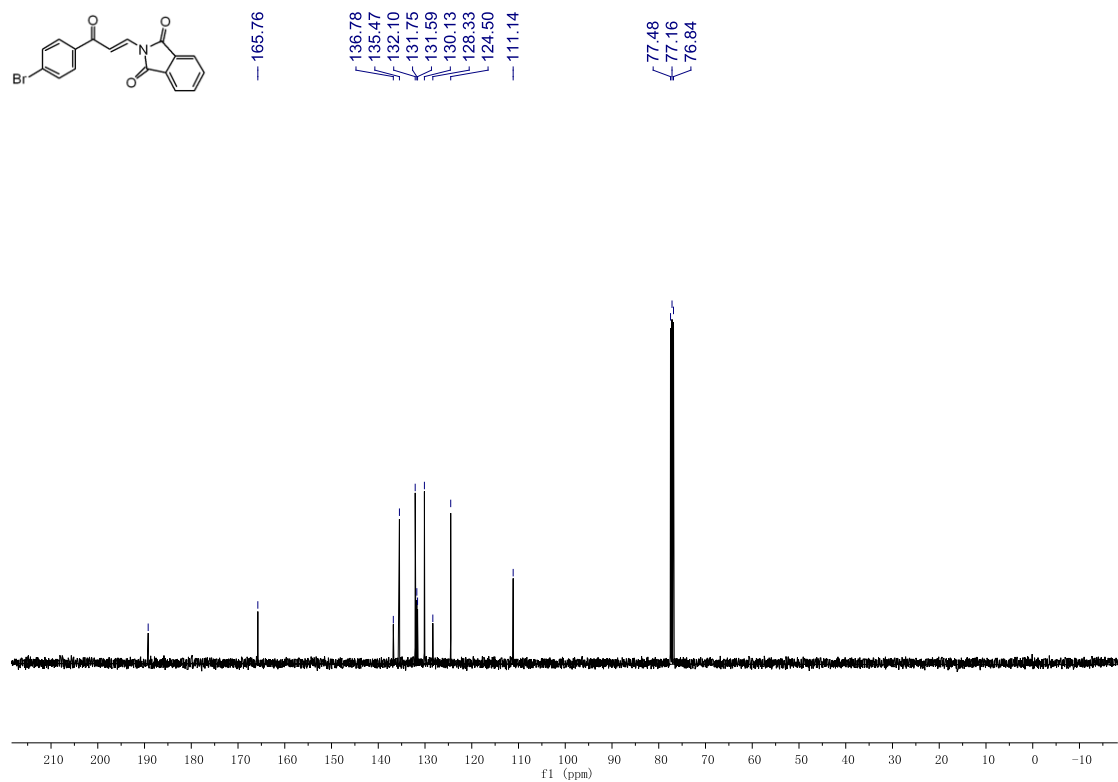

(*E*)-2-(3-(3-bromophenyl)-3-oxoprop-1-en-1-yl)isoindoline-1,3-dione (**1i**)

$^1\text{H}$  NMR (600 MHz,  $\text{CDCl}_3$ )

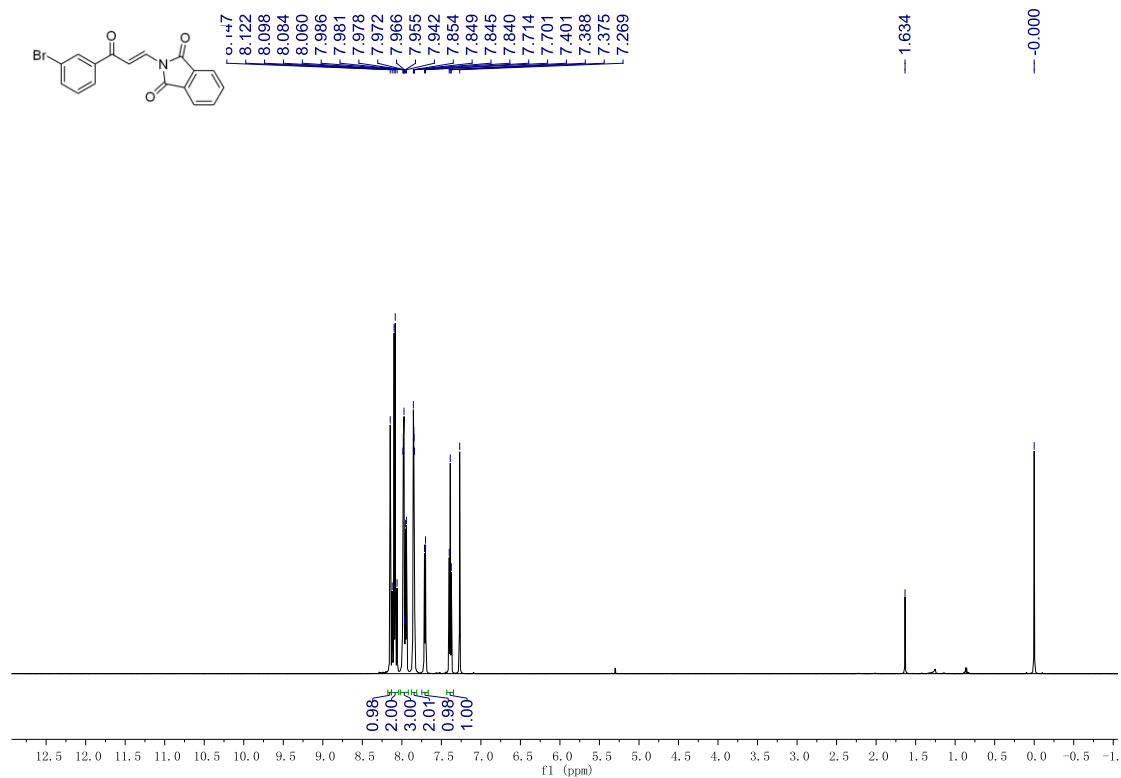

$^{13}\text{C}$  { $^1\text{H}$ } NMR (100 MHz,  $\text{CDCl}_3$ )

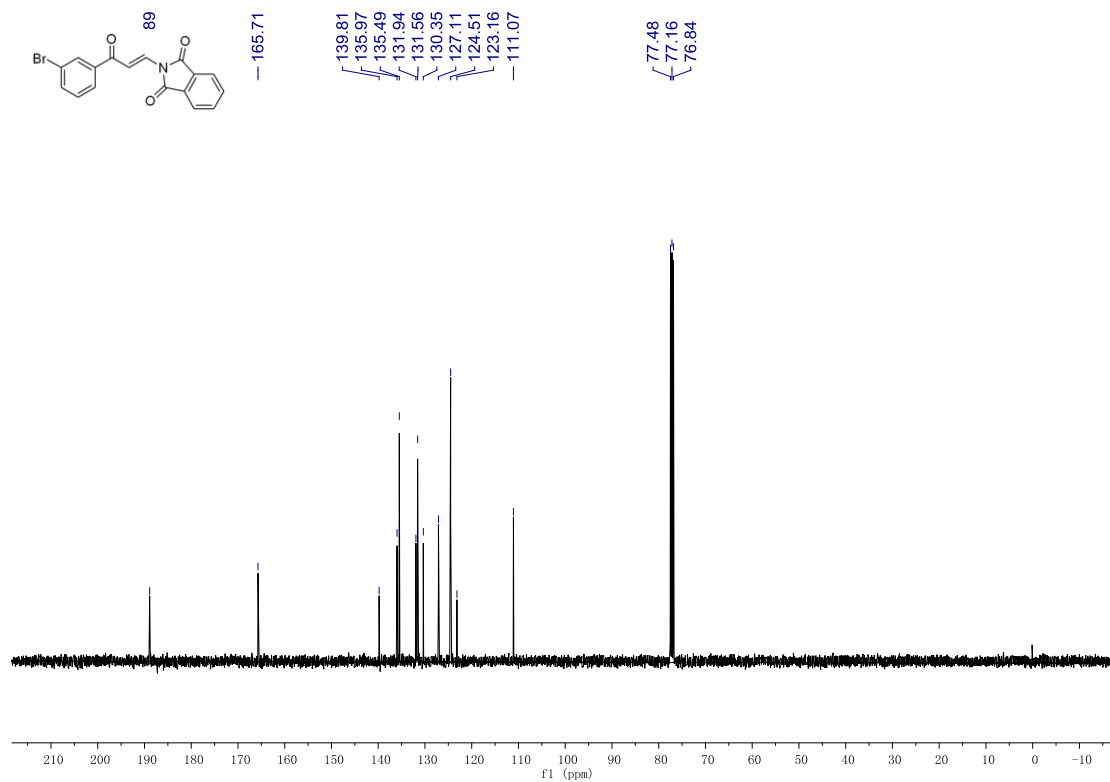

(*E*)-2-(3-(2-bromophenyl)-3-oxoprop-1-en-1-yl)isoindoline-1,3-dione (**1j**)

$^1\text{H}$  NMR (600 MHz,  $\text{CDCl}_3$ )

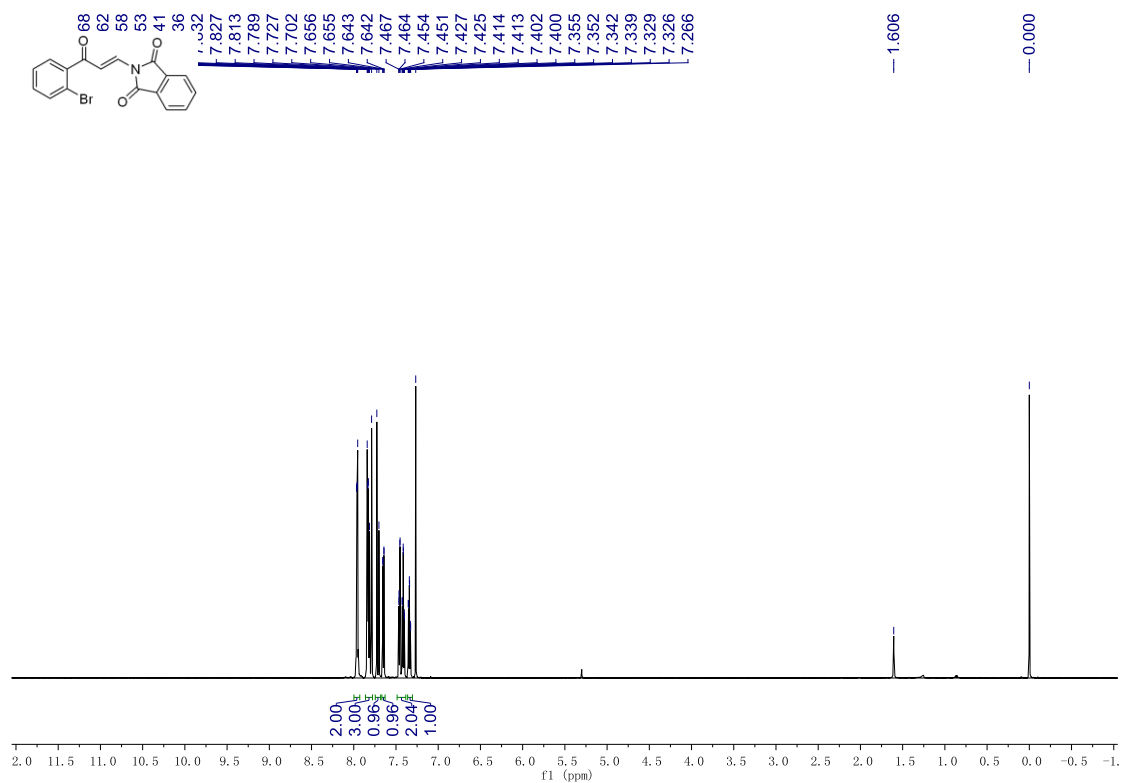

$^{13}\text{C}$  { $^1\text{H}$ } NMR (150 MHz,  $\text{CDCl}_3$ )

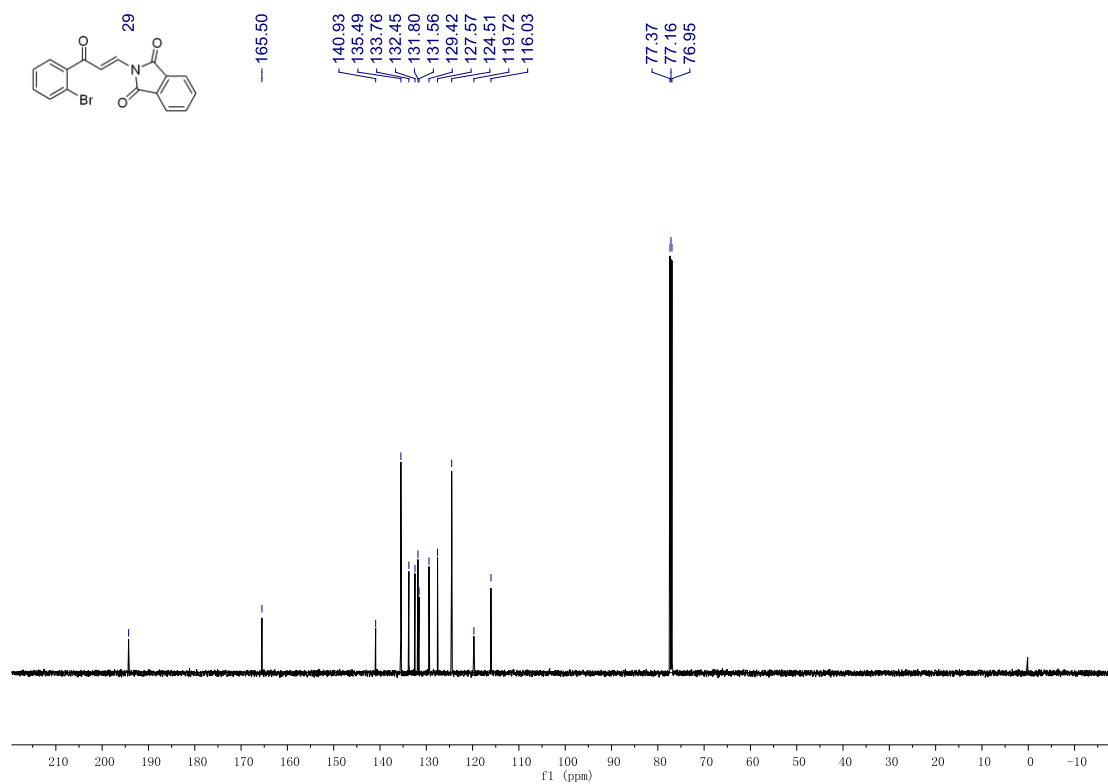

(E)-2-(3-oxo-3-(4-(trifluoromethyl)phenyl)prop-1-en-1-yl)isoindoline-1,3-dione (**1k**)

$^1\text{H}$  NMR (400 MHz,  $\text{CDCl}_3$ )

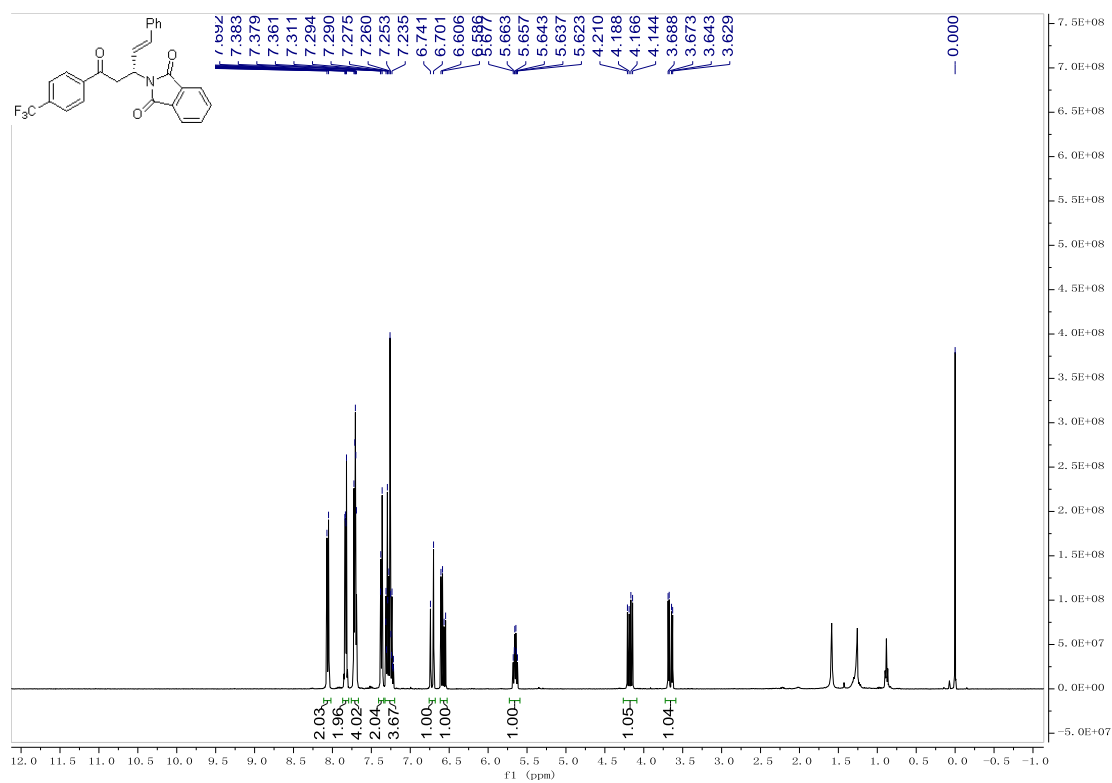

$^{13}\text{C}$  { $^1\text{H}$ } NMR (150 MHz,  $\text{CDCl}_3$ )

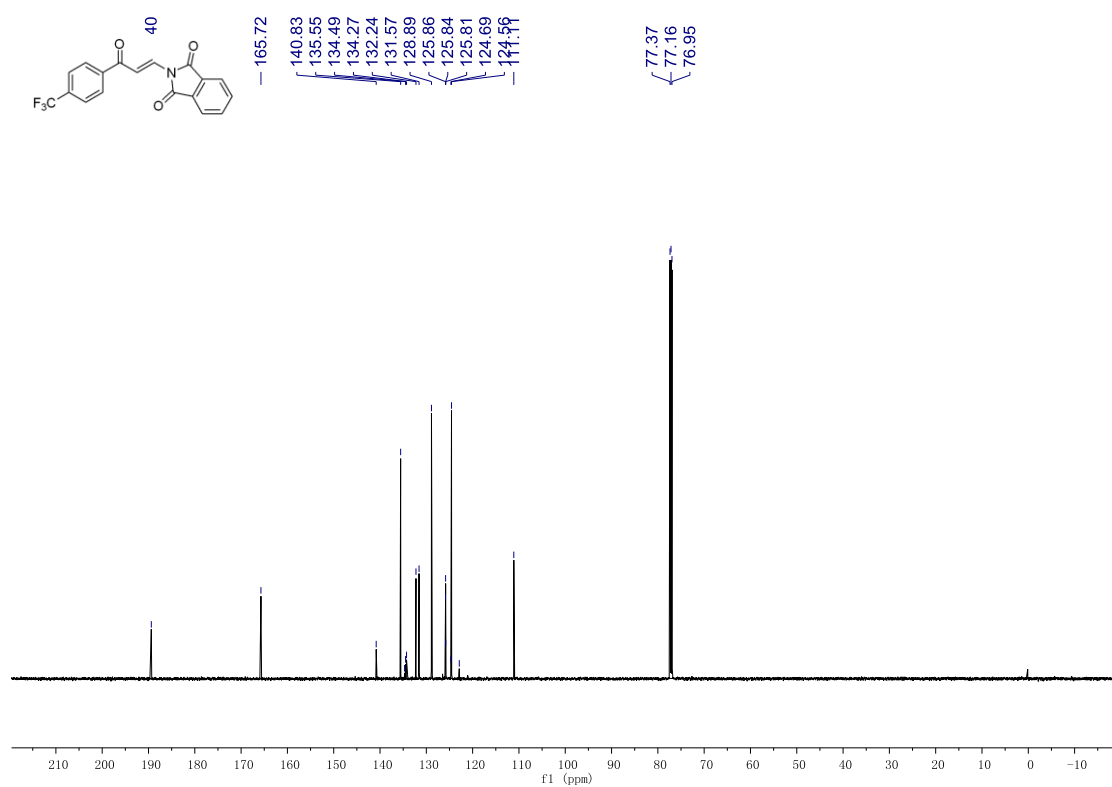

$^{19}\text{F}$   $\{^1\text{H}\}$  NMR (564 MHz,  $\text{CDCl}_3$ )

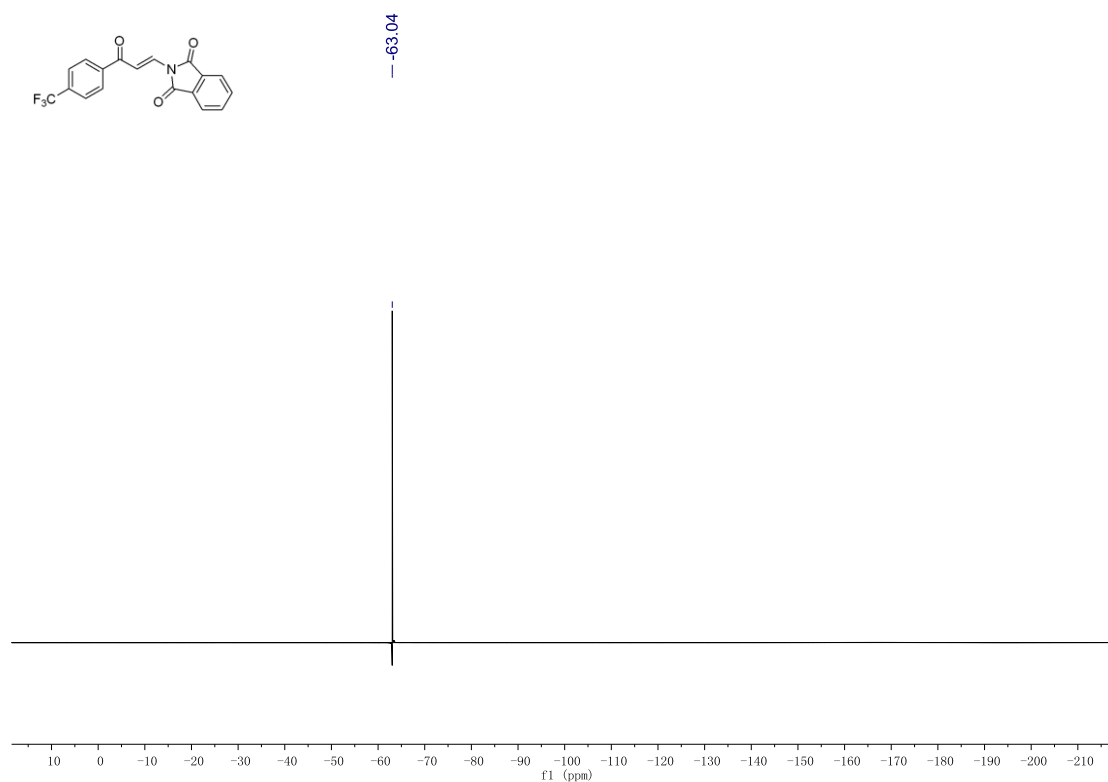

(E)-2-(3-(4-nitrophenyl)-3-oxoprop-1-en-1-yl)isoindoline-1,3-dione (**11**)

$^1\text{H}$  NMR (600 MHz,  $\text{CDCl}_3$ )

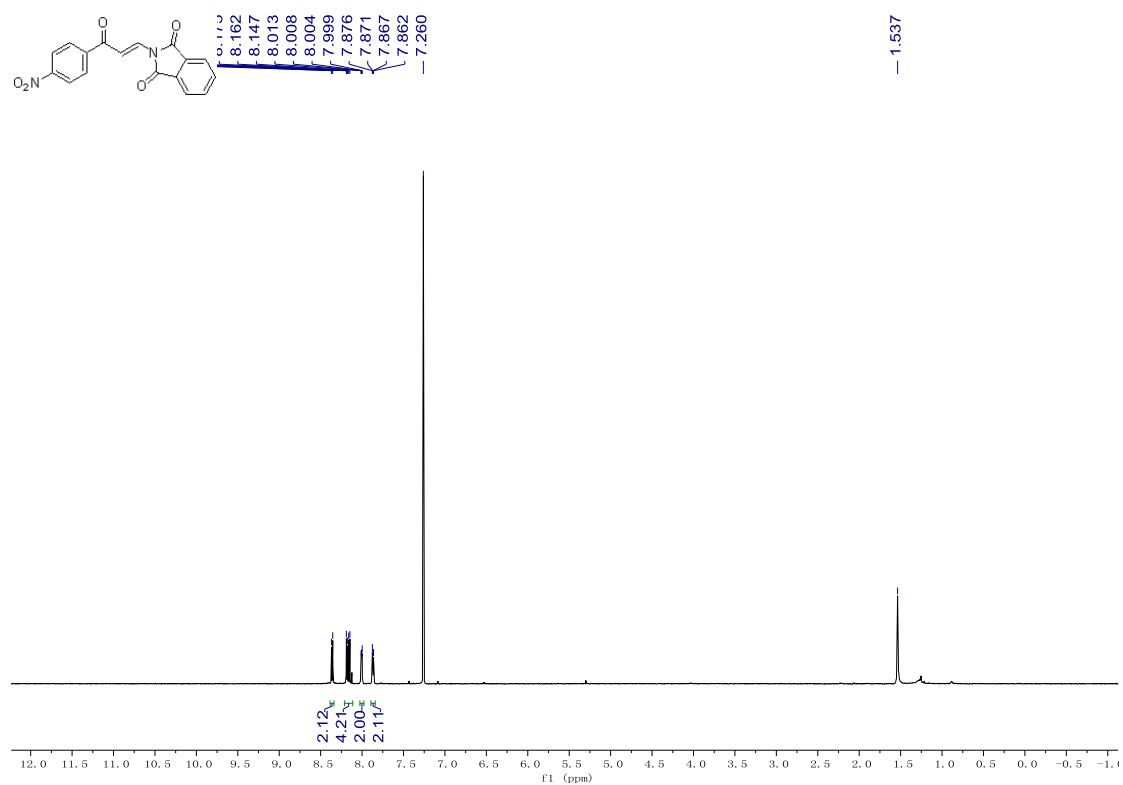

(E)-2-(3-(3,4-dichlorophenyl)-3-oxoprop-1-en-1-yl)isoindoline-1,3-dione (**1m**)

$^1\text{H}$  NMR (600 MHz,  $\text{CDCl}_3$ )

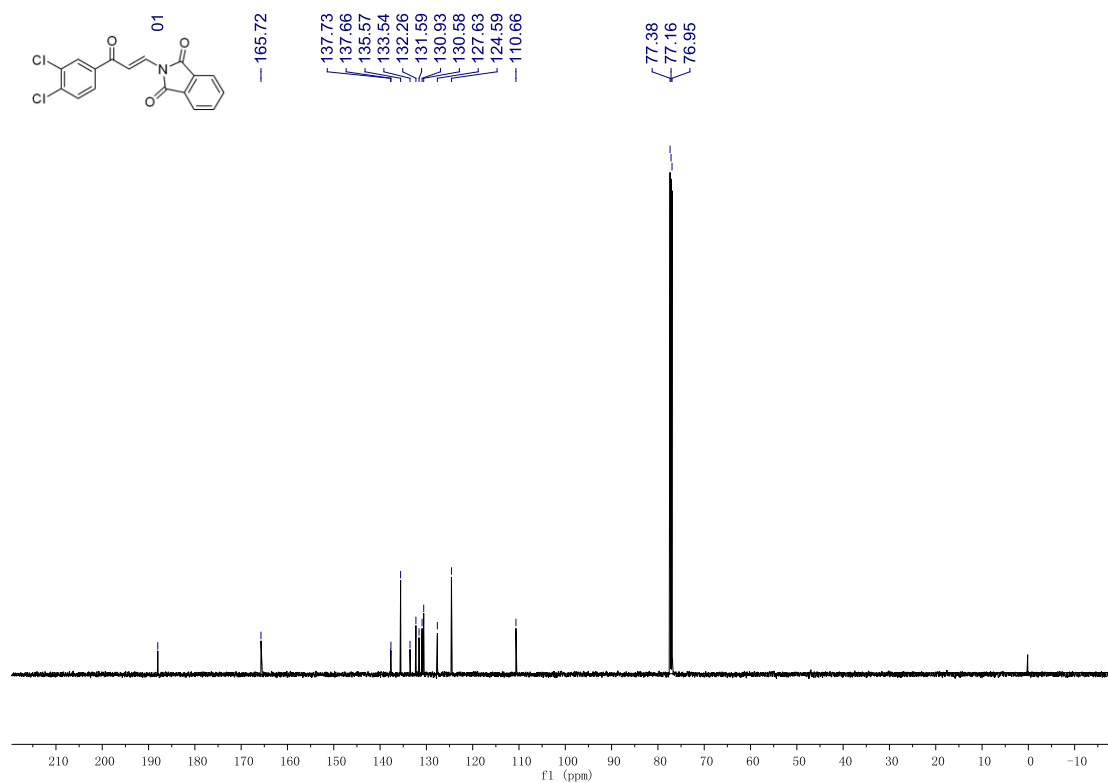

$^{13}\text{C}$  { $^1\text{H}$ } NMR (150 MHz,  $\text{CDCl}_3$ )

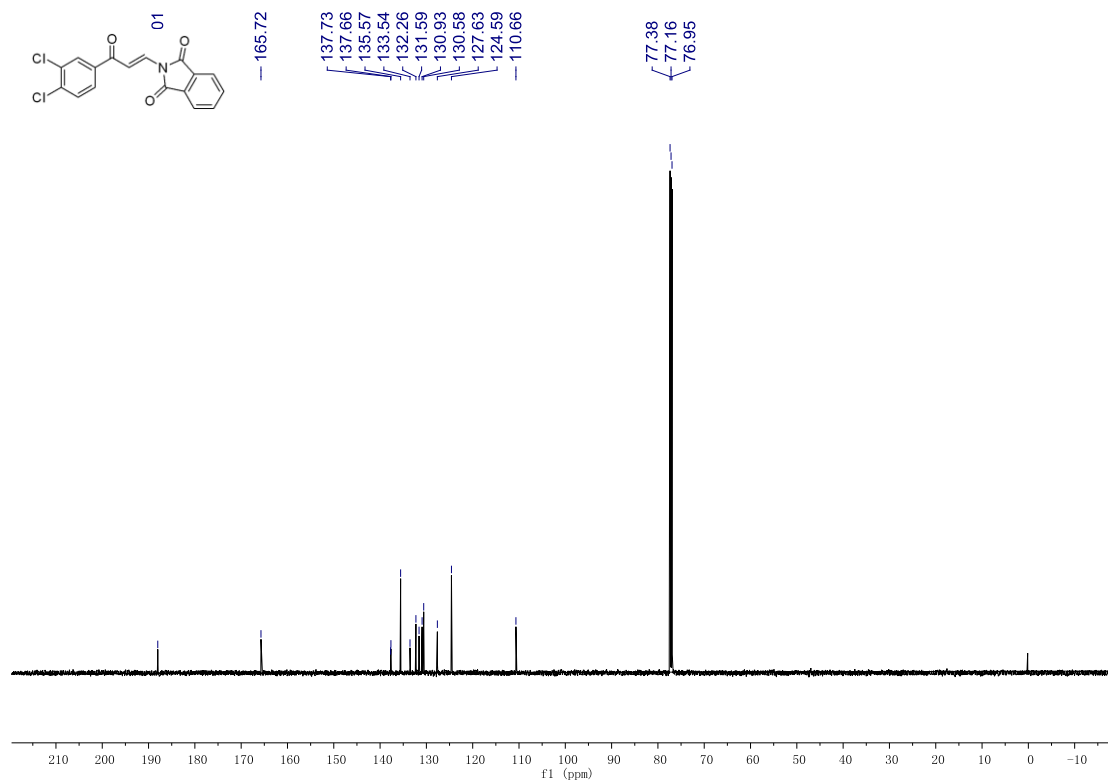



(E)-2-(3-(naphthalen-2-yl)-3-oxoprop-1-en-1-yl)isoindoline-1,3-dione (**1n**)

$^1\text{H}$  NMR (600 MHz,  $\text{CDCl}_3$ )

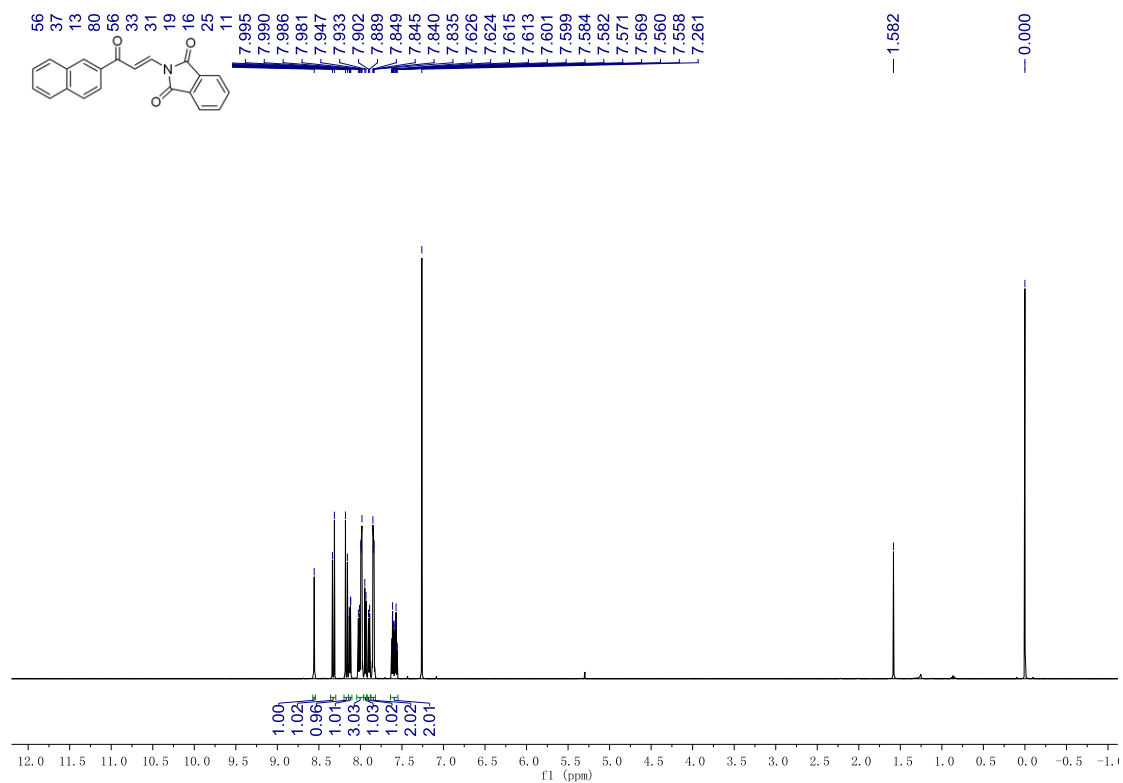

$^{13}\text{C}$  { $^1\text{H}$ } NMR (150 MHz,  $\text{CDCl}_3$ )

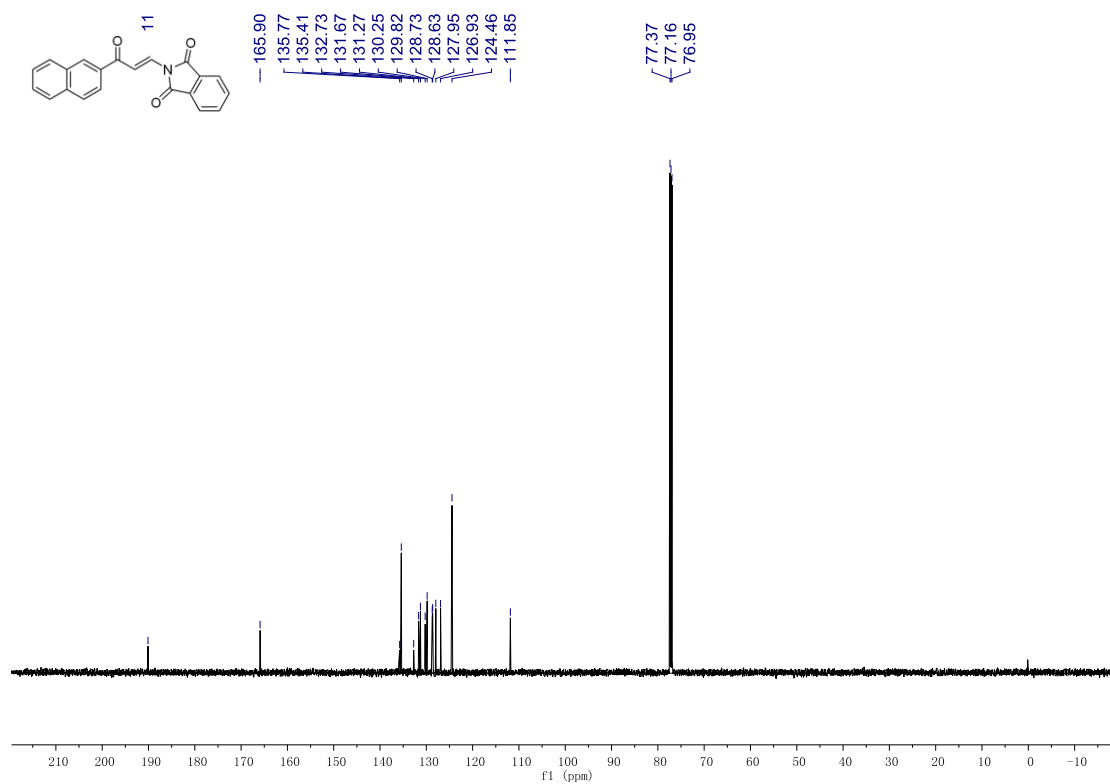

(*E*)-2-(3-(naphthalen-1-yl)-3-oxoprop-1-en-1-yl)isoindoline-1,3-dione (**1o**)

$^1\text{H}$  NMR (600 MHz,  $\text{CDCl}_3$ )

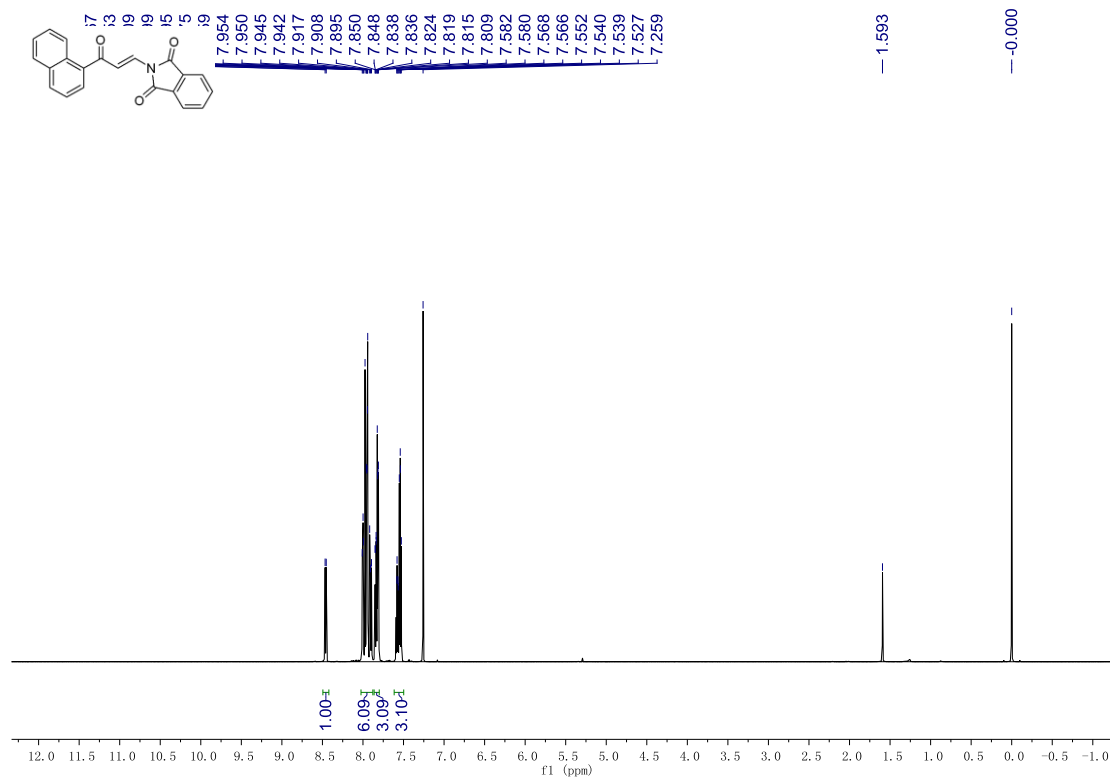

$^{13}\text{C}$  { $^1\text{H}$ } NMR (150 MHz,  $\text{CDCl}_3$ )

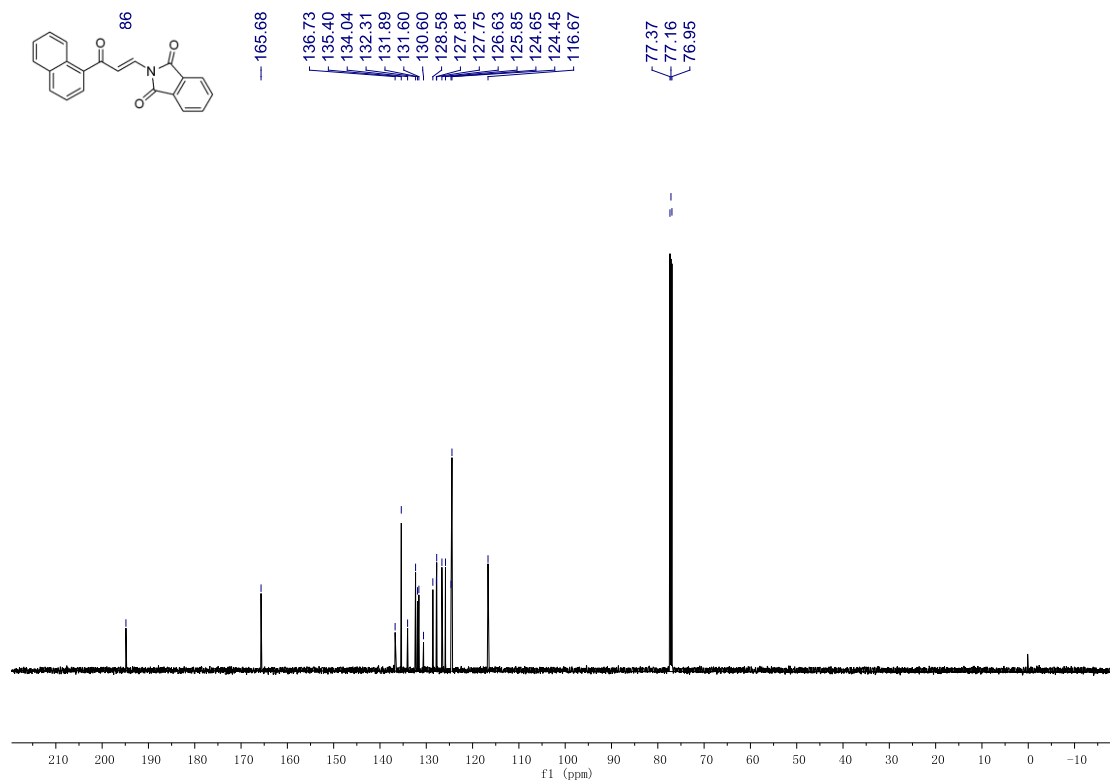

(*E*)-2-(3-oxo-3-(thiophen-2-yl)prop-1-en-1-yl)isoindoline-1,3-dione (**1q**)

$^1\text{H}$  NMR (400 MHz,  $\text{CDCl}_3$ )

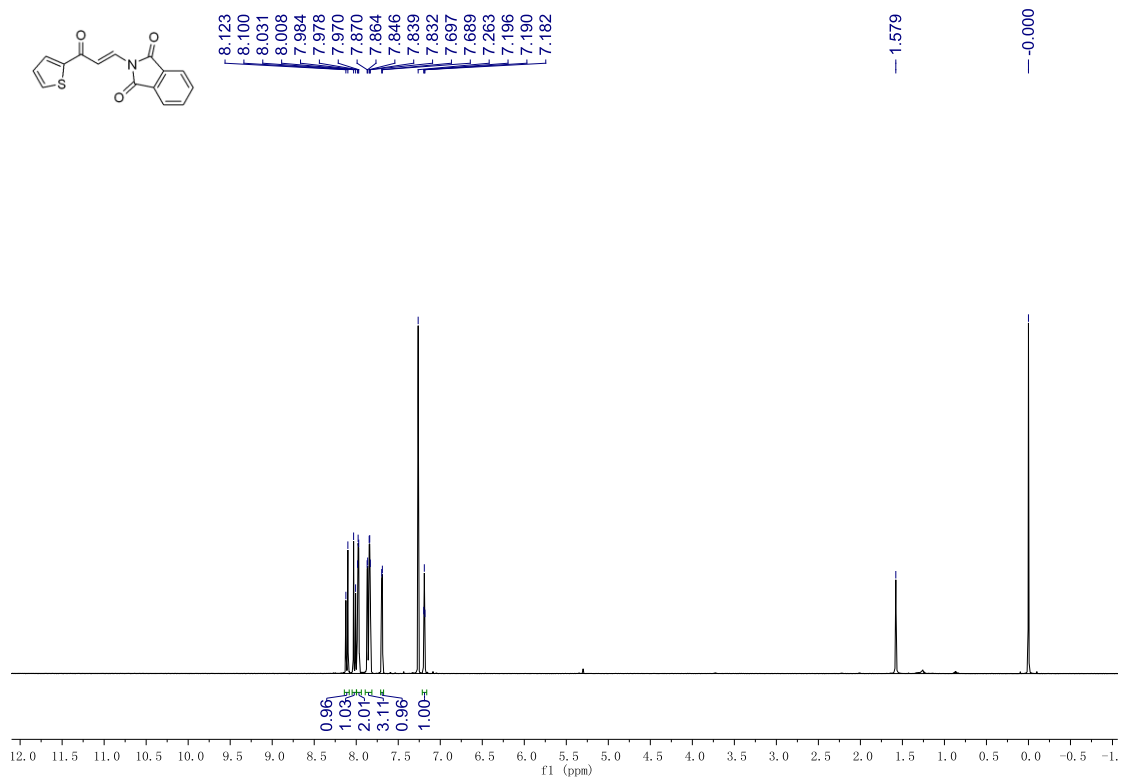

$^{13}\text{C}$  { $^1\text{H}$ } NMR (100 MHz,  $\text{CDCl}_3$ )

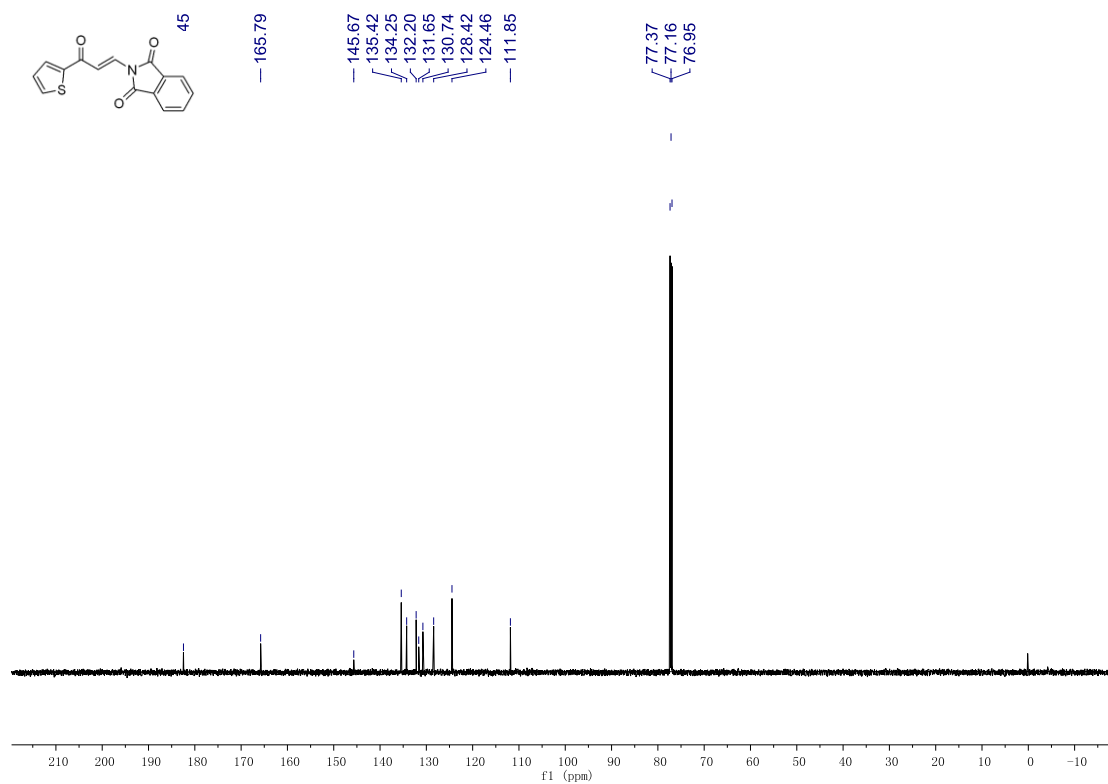

(E)-2-(3-oxo-3-(thiophen-3-yl)prop-1-en-1-yl)isoindoline-1,3-dione (**1r**)

$^1\text{H}$  NMR (600 MHz,  $\text{CDCl}_3$ )

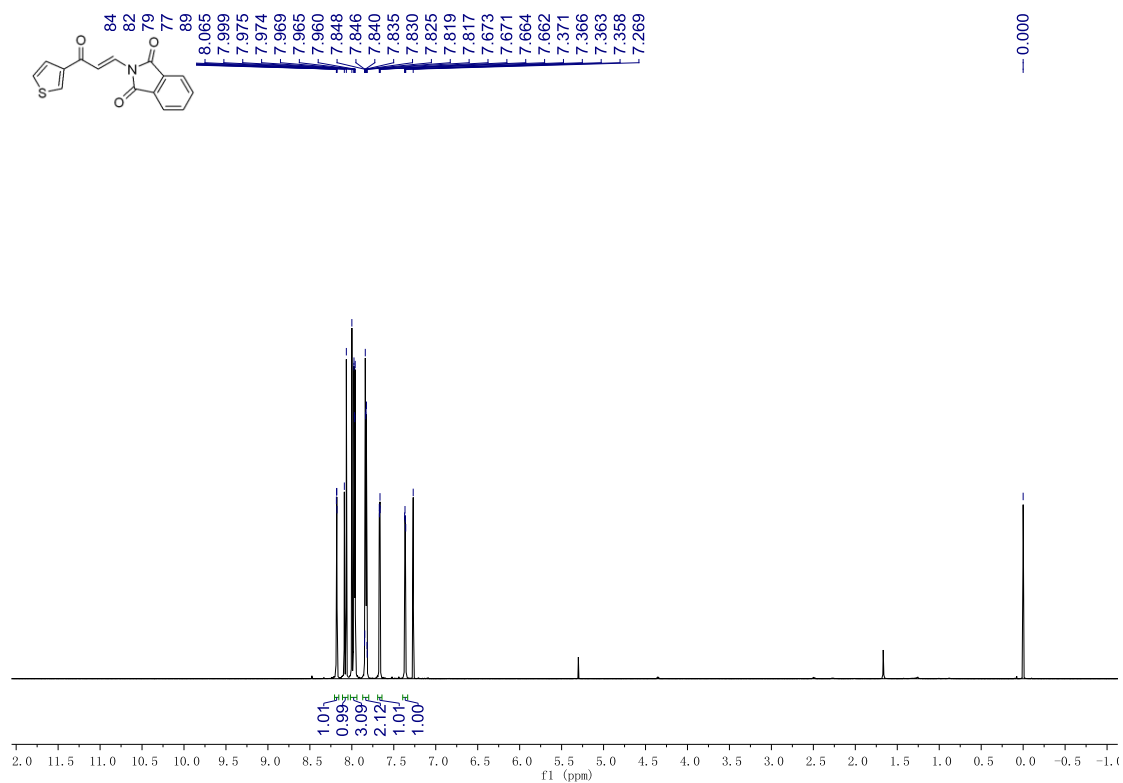

$^{13}\text{C}$  { $^1\text{H}$ } NMR (150 MHz,  $\text{CDCl}_3$ )

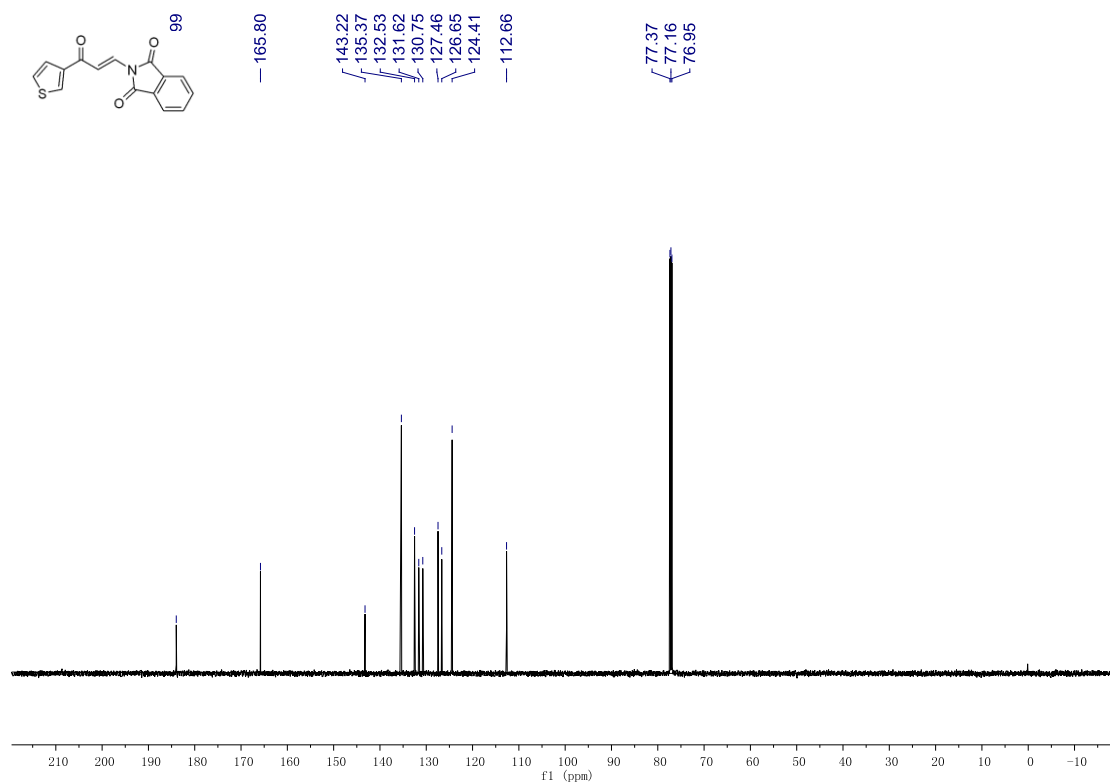

(E)-2-(3-cyclohexyl-3-oxoprop-1-en-1-yl)isoindoline-1,3-dione (**1t**)

$^1\text{H}$  NMR (600 MHz,  $\text{CDCl}_3$ )

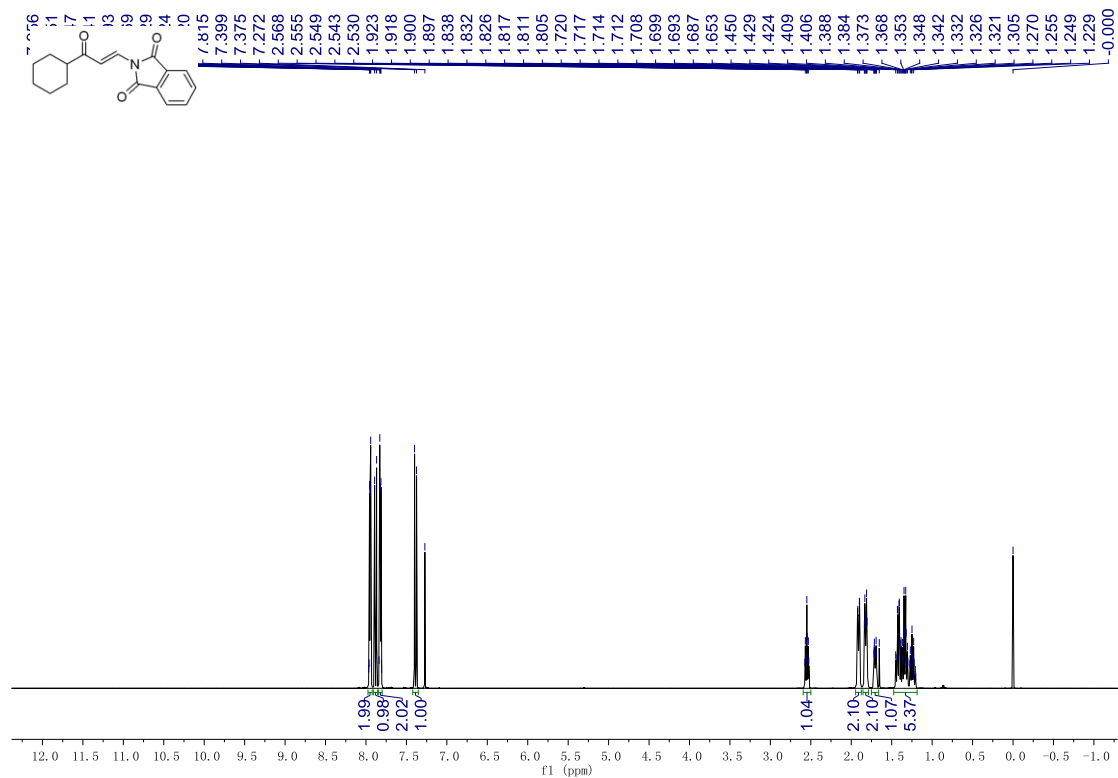

$^{13}\text{C}$  { $^1\text{H}$ } NMR (150 MHz,  $\text{CDCl}_3$ )

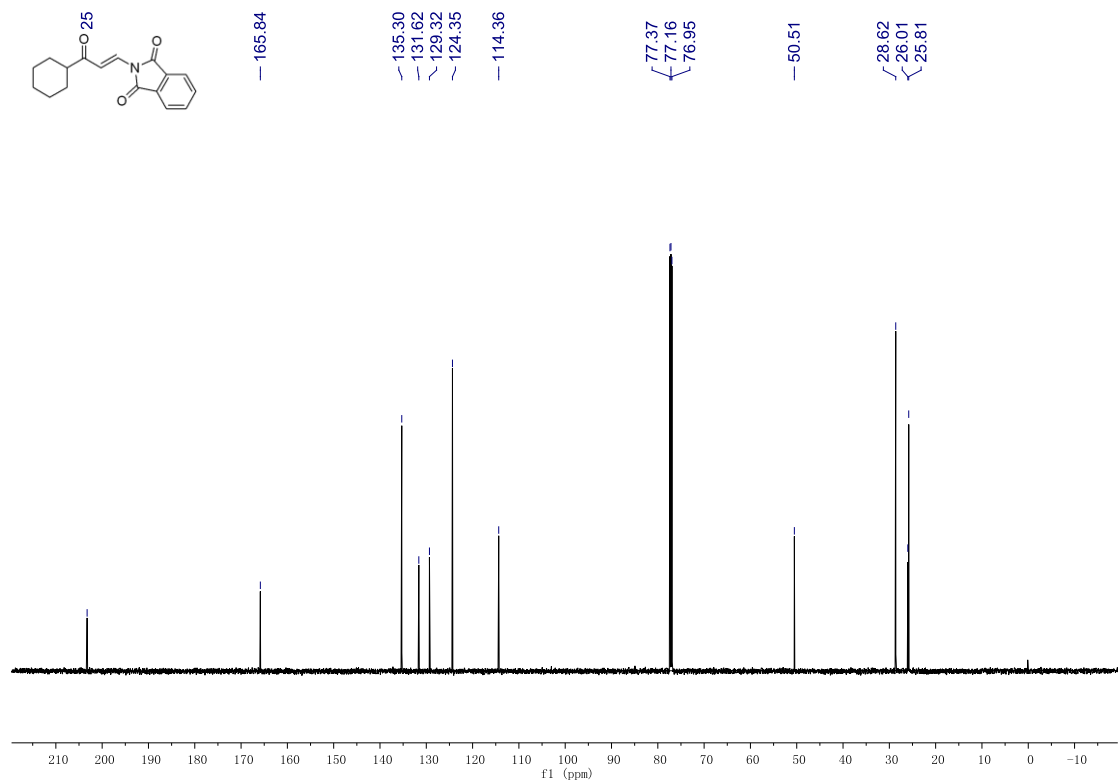

(E)-1-(3-oxo-3-phenylprop-1-en-1-yl)pyrrolidine-2,5-dione (**1u**)

$^1\text{H}$  NMR (400 MHz,  $\text{CDCl}_3$ )

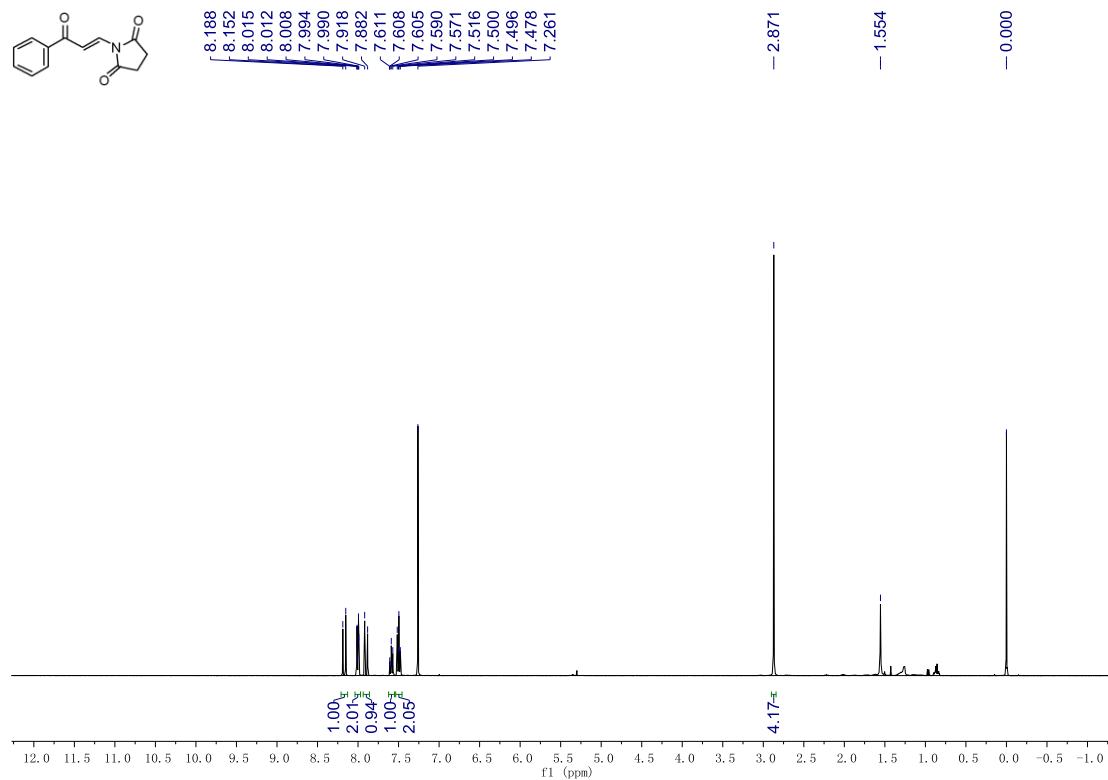

$^{13}\text{C}$  { $^1\text{H}$ } NMR (150 MHz,  $\text{CDCl}_3$ )

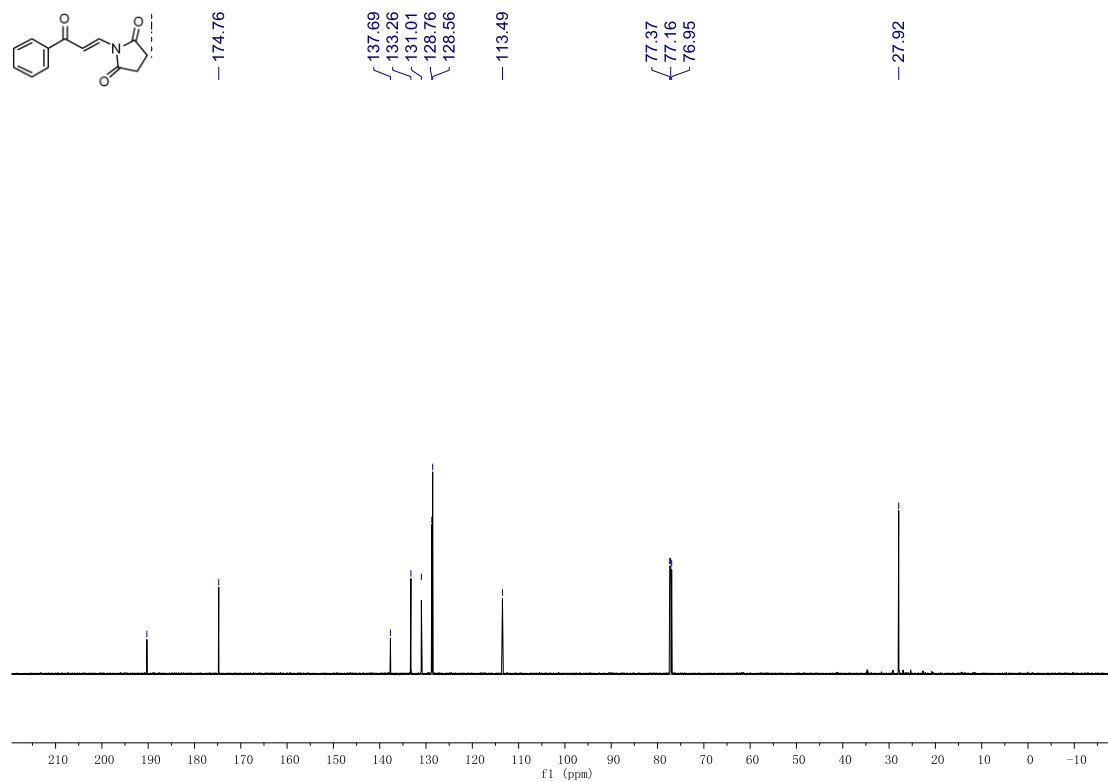

(E)-3-(1H-benzo[d]imidazol-1-yl)-1-phenylprop-2-en-1-one (**1v**)

<sup>1</sup>H NMR (600 MHz, CDCl<sub>3</sub>)

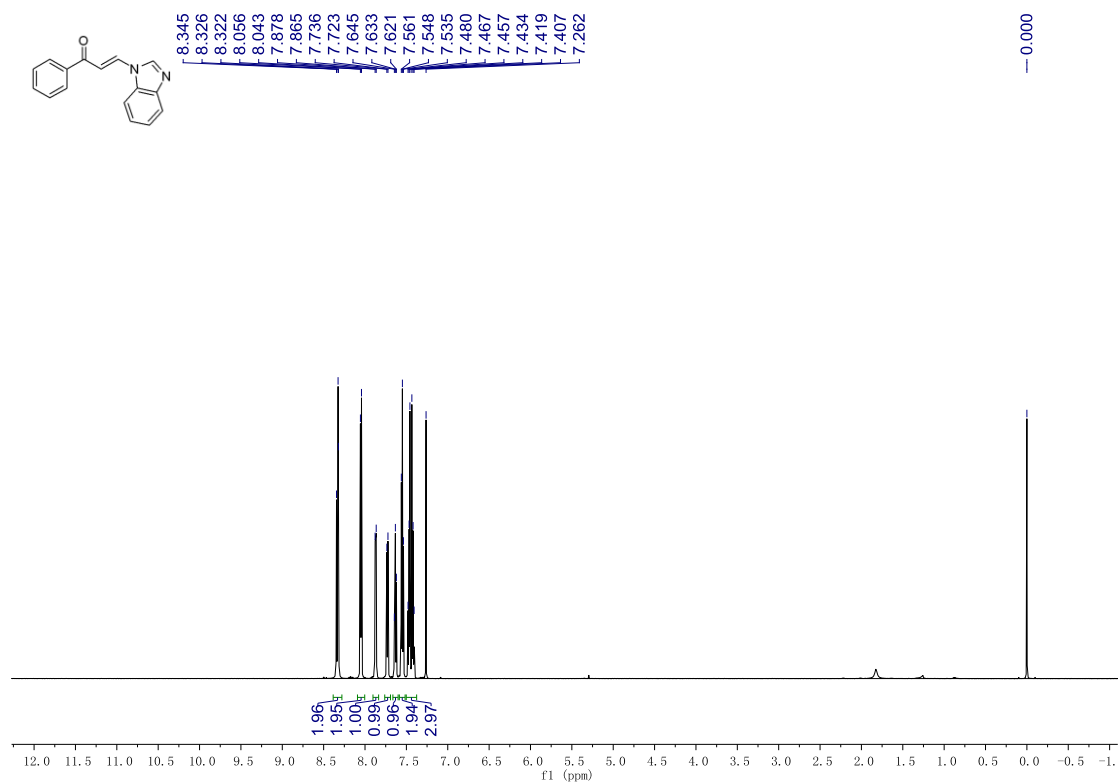

<sup>13</sup>C {<sup>1</sup>H} NMR (150 MHz, CDCl<sub>3</sub>)

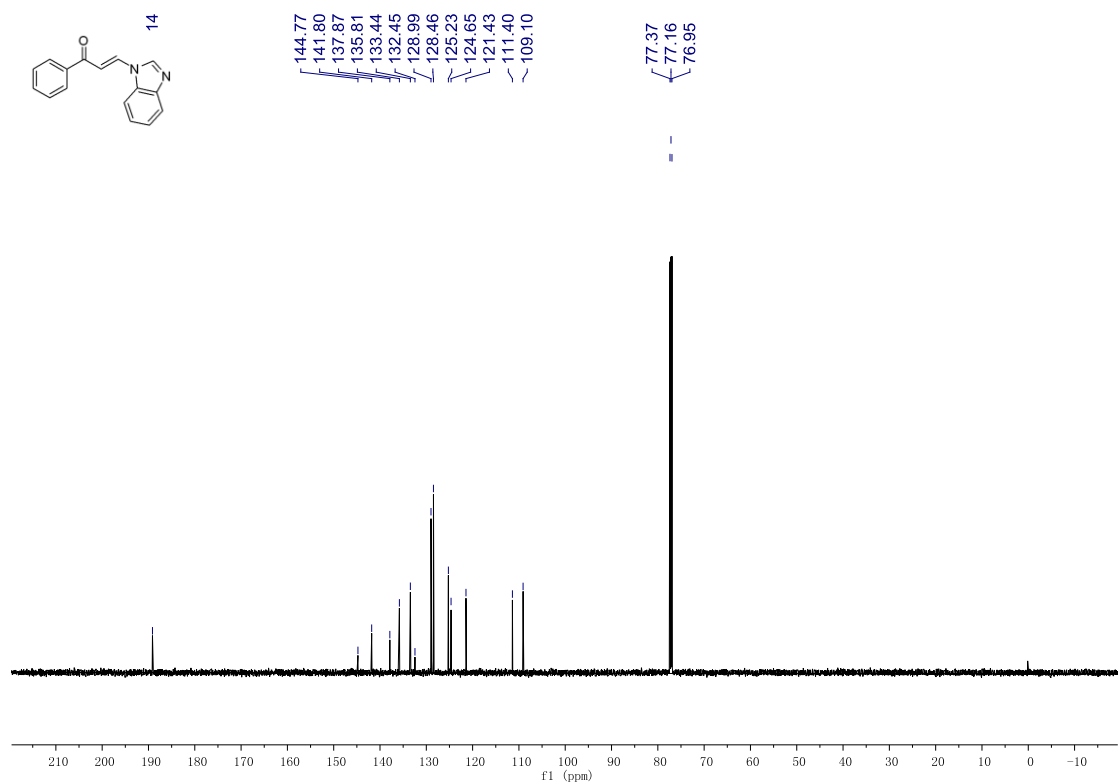

**(R,E)-2-(5-oxo-1,5-diphenylpent-1-en-3-yl)isoindoline-1,3-dione (3aa)**

<sup>1</sup>H NMR (400 MHz, CDCl<sub>3</sub>)

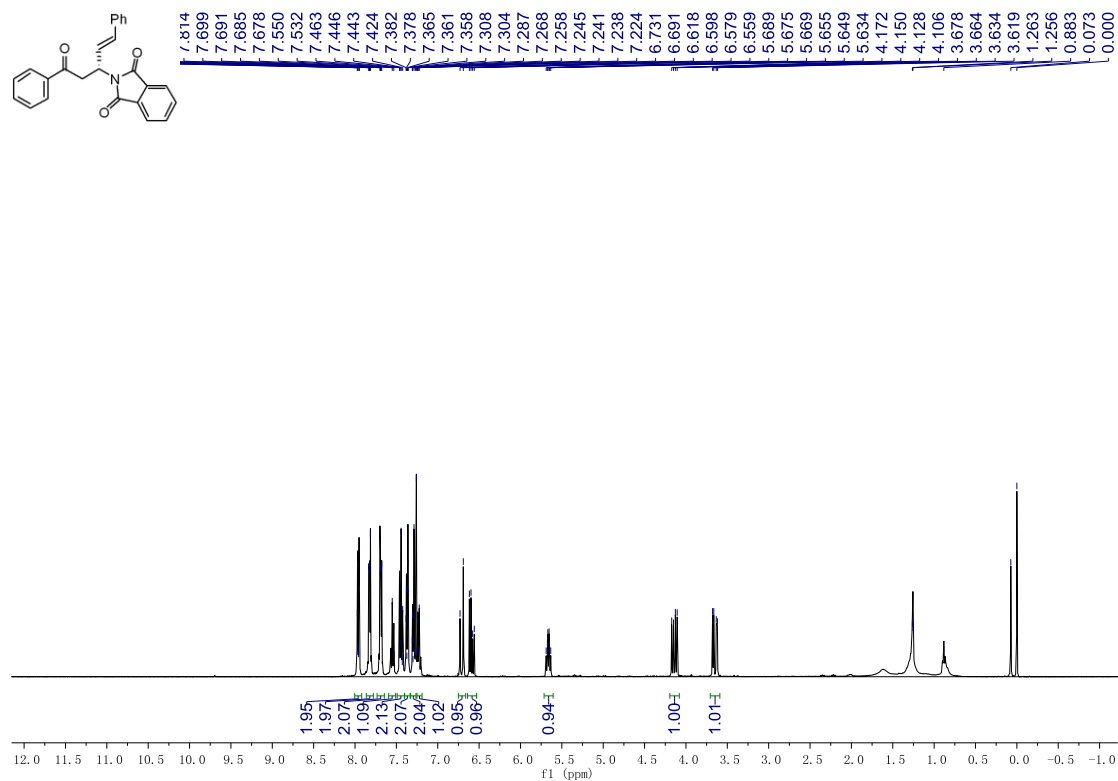

**(R,E)-2-(5-oxo-1-phenyl-5-(p-tolyl)pent-1-en-3-yl)isoindoline-1,3-dione (3ba)**

<sup>1</sup>H NMR (600 MHz, CDCl<sub>3</sub>)

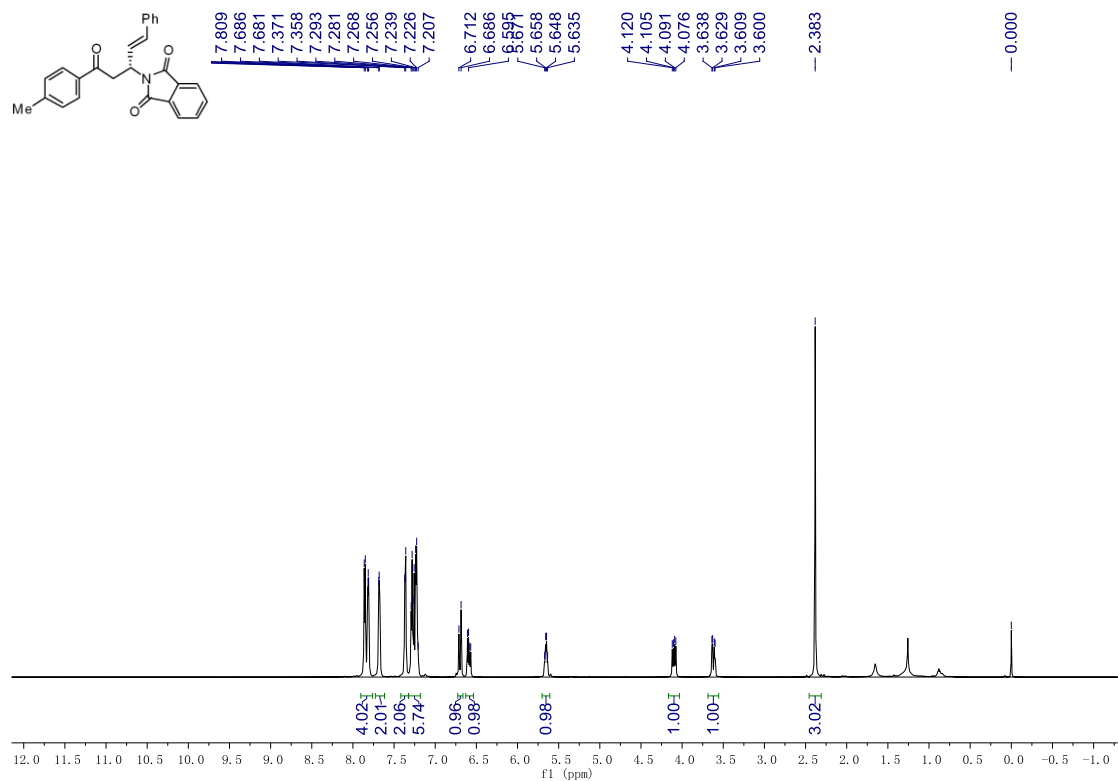



$^{13}\text{C}$  { $^1\text{H}$ } NMR (150 MHz,  $\text{CDCl}_3$ )

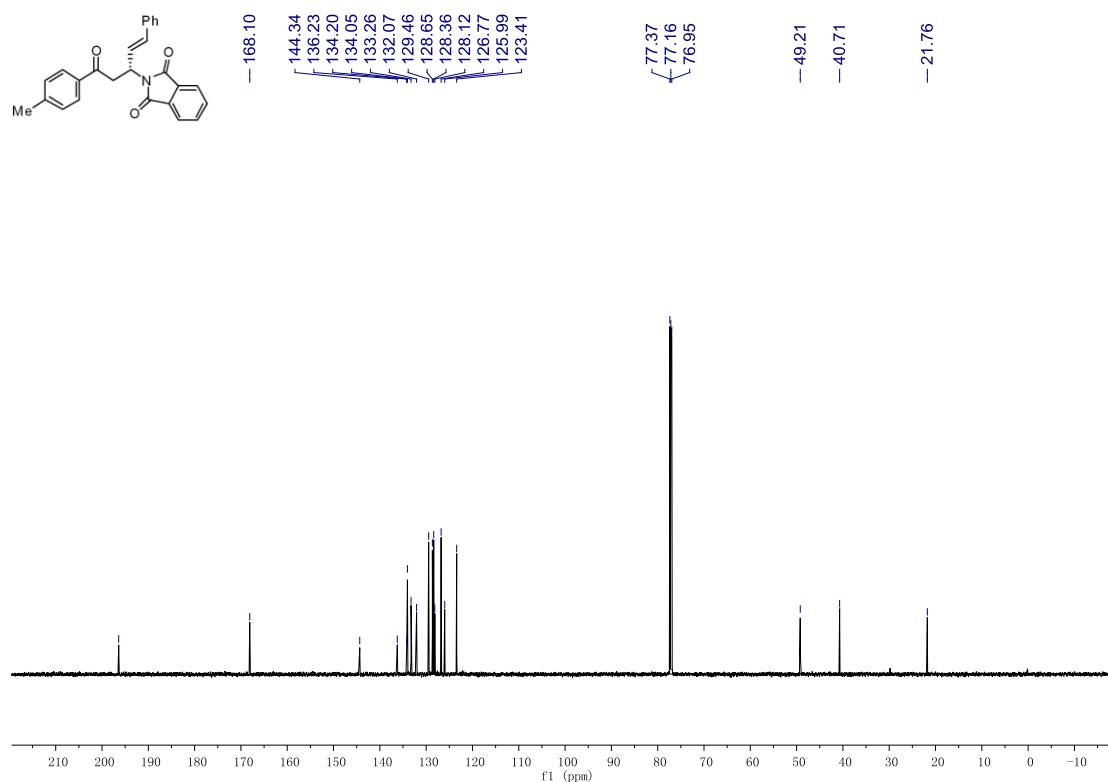

**(R,E)-2-(5-oxo-1-phenyl-5-(m-tolyl)pent-1-en-3-yl)isoindoline-1,3-dione (3ca)**

$^1\text{H}$  NMR (400 MHz,  $\text{CDCl}_3$ )

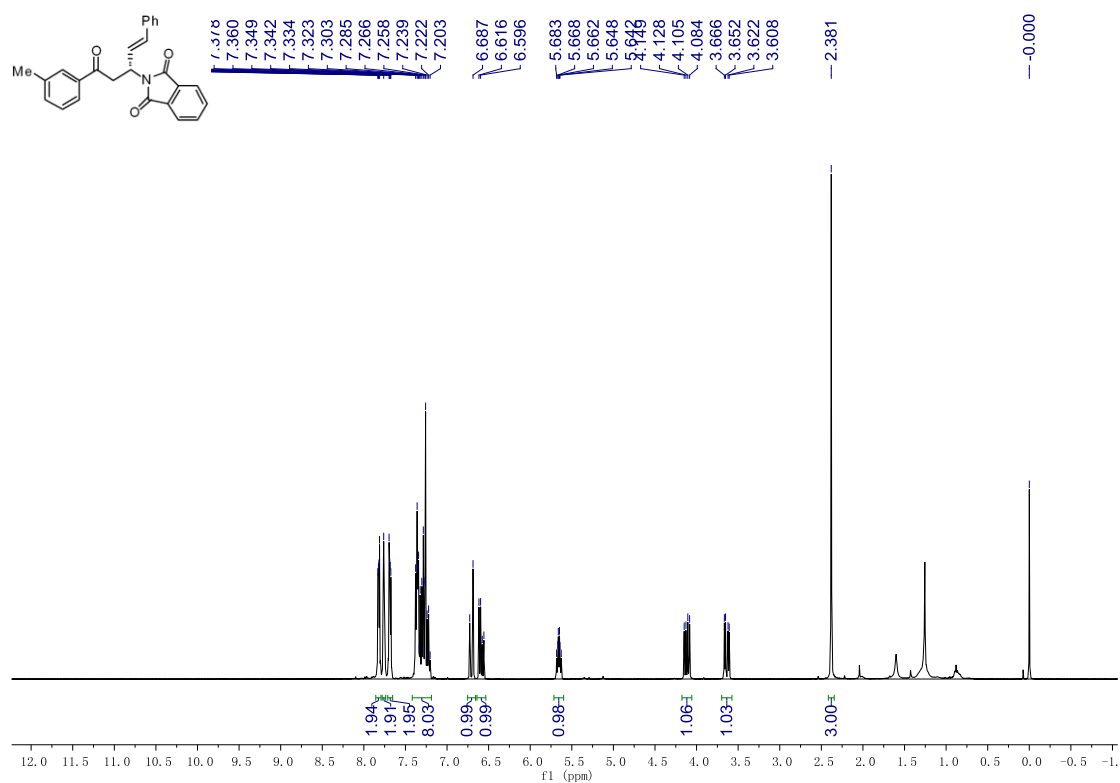

$^{13}\text{C}$  { $^1\text{H}$ } NMR (100 MHz,  $\text{CDCl}_3$ )

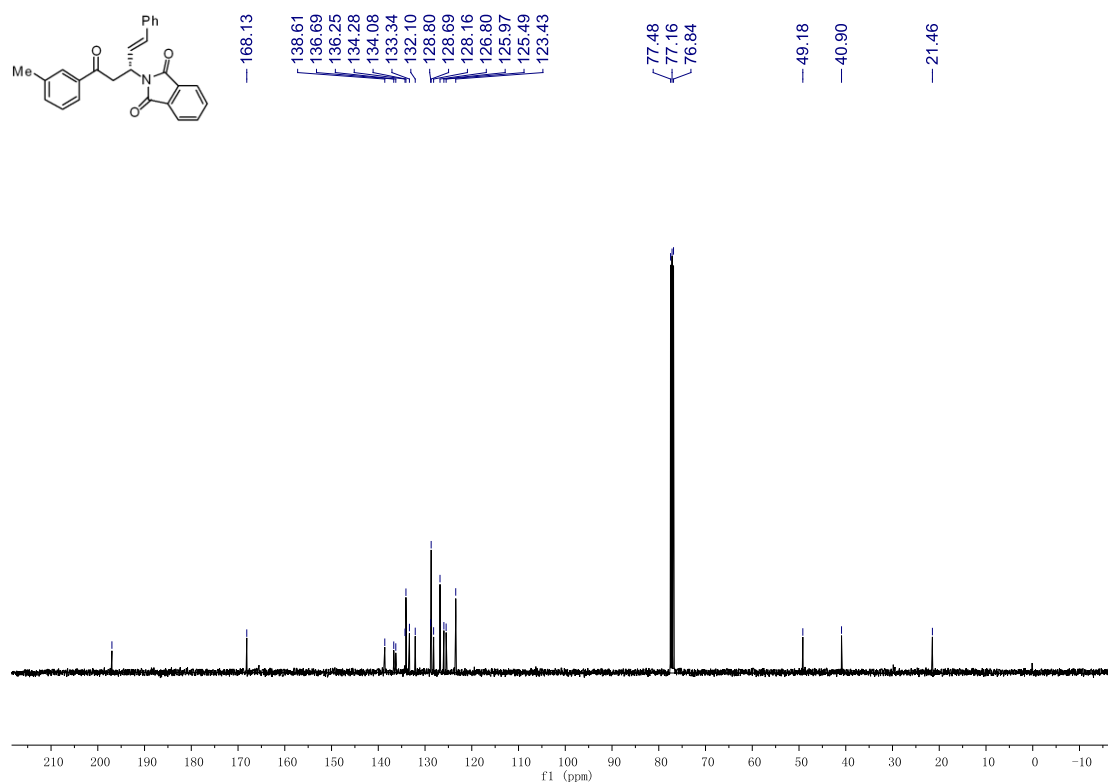

**(R,E)-2-(5-oxo-1-phenyl-5-(o-tolyl)pent-1-en-3-yl)isoindoline-1,3-dione (3da)**

$^1\text{H}$  NMR (600 MHz,  $\text{CDCl}_3$ )

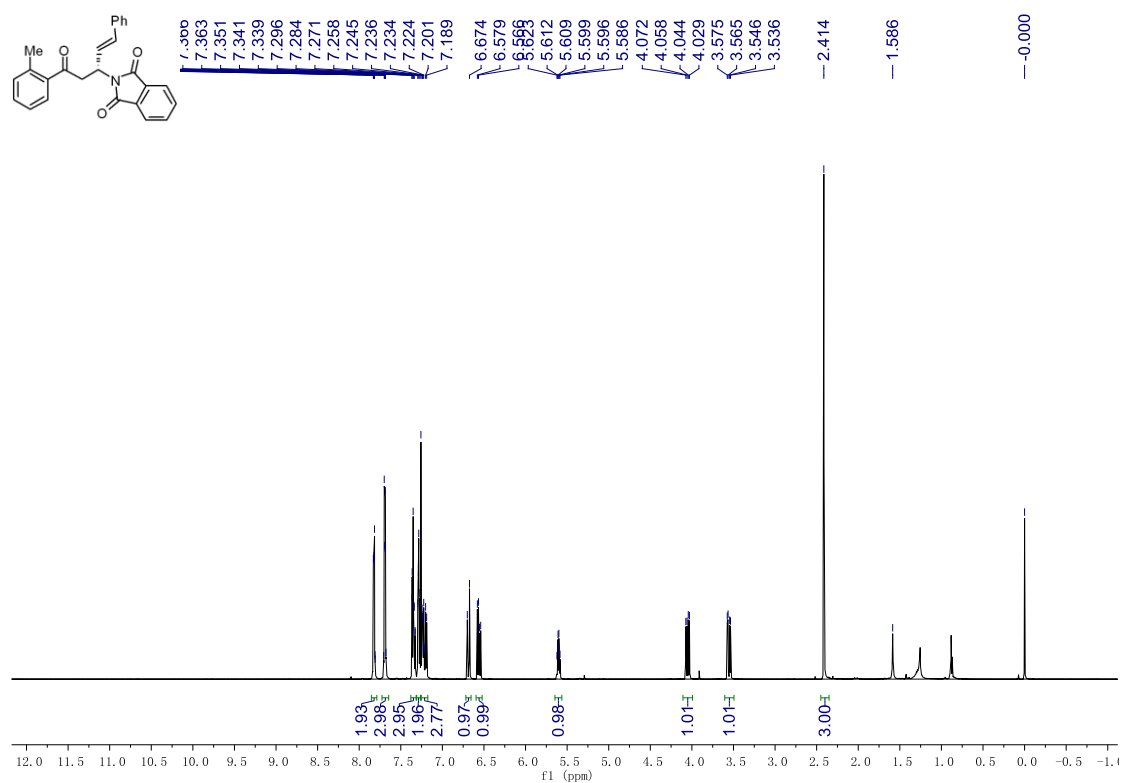

$^{13}\text{C}$   $\{^1\text{H}\}$  NMR (150 MHz,  $\text{CDCl}_3$ )

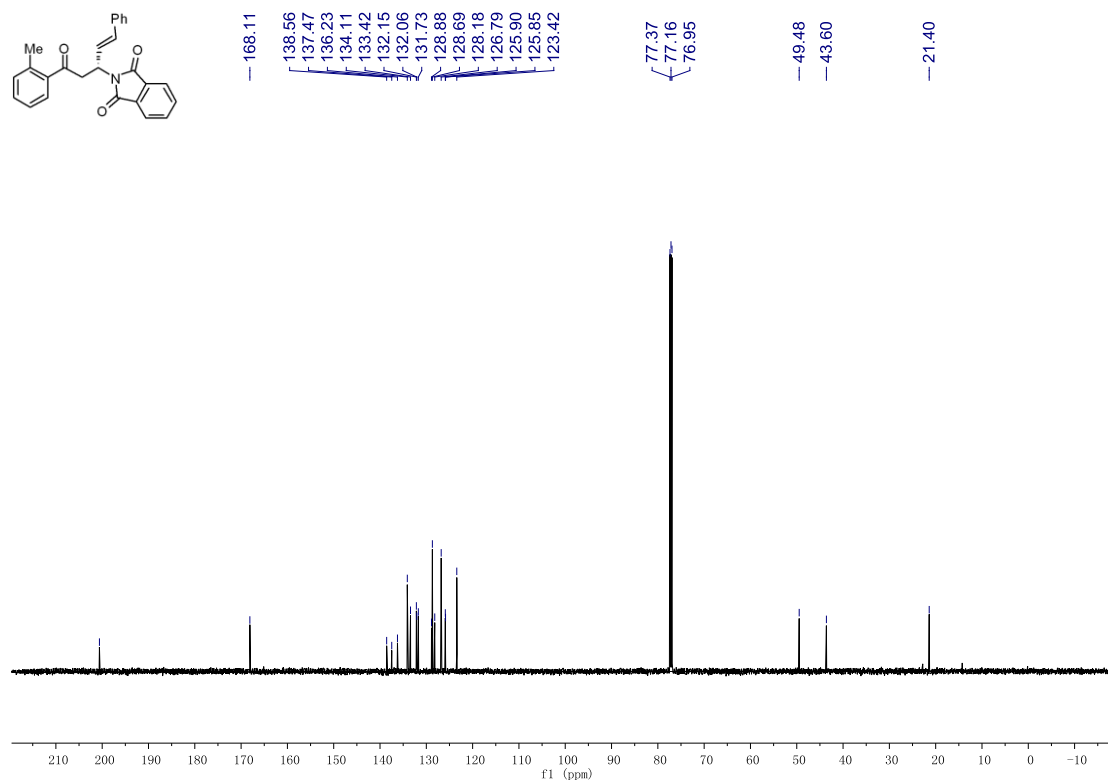

**(R,E)-2-(5-(4-methoxyphenyl)-5-oxo-1-phenylpent-1-en-3-yl)isoindoline-1,3-dione (3ea)**

$^1\text{H}$  NMR (600 MHz,  $\text{CDCl}_3$ )

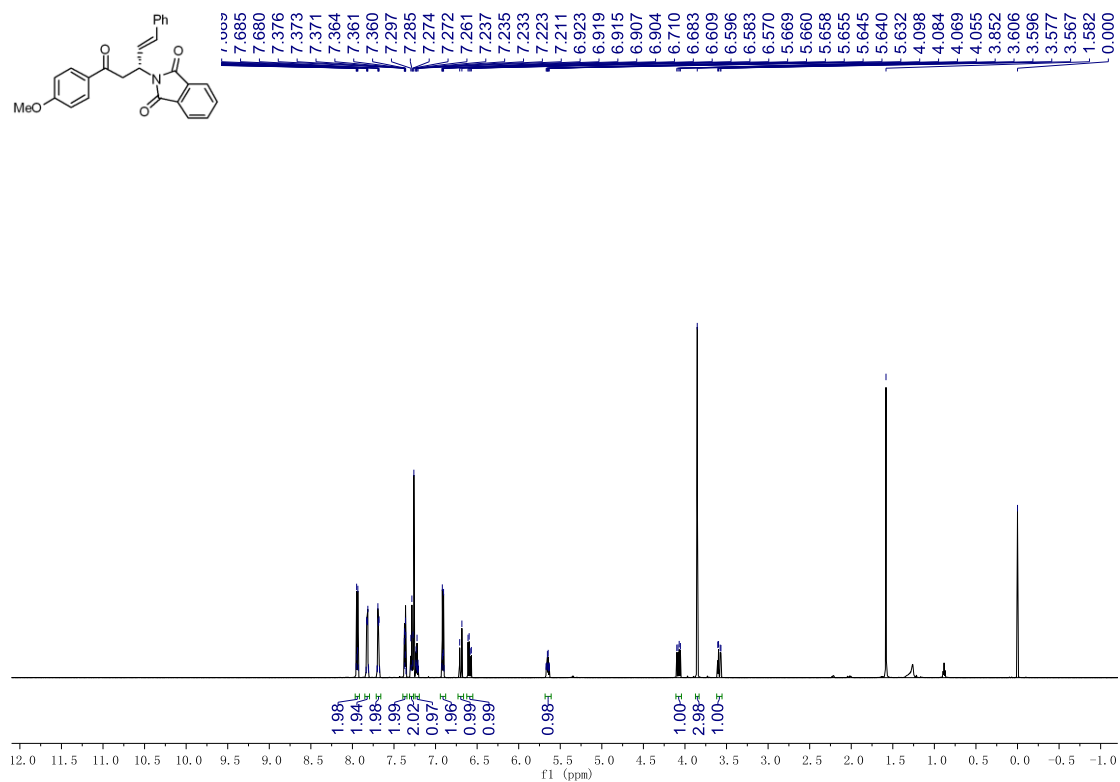

$^{13}\text{C}$  { $^1\text{H}$ } NMR (150 MHz,  $\text{CDCl}_3$ )

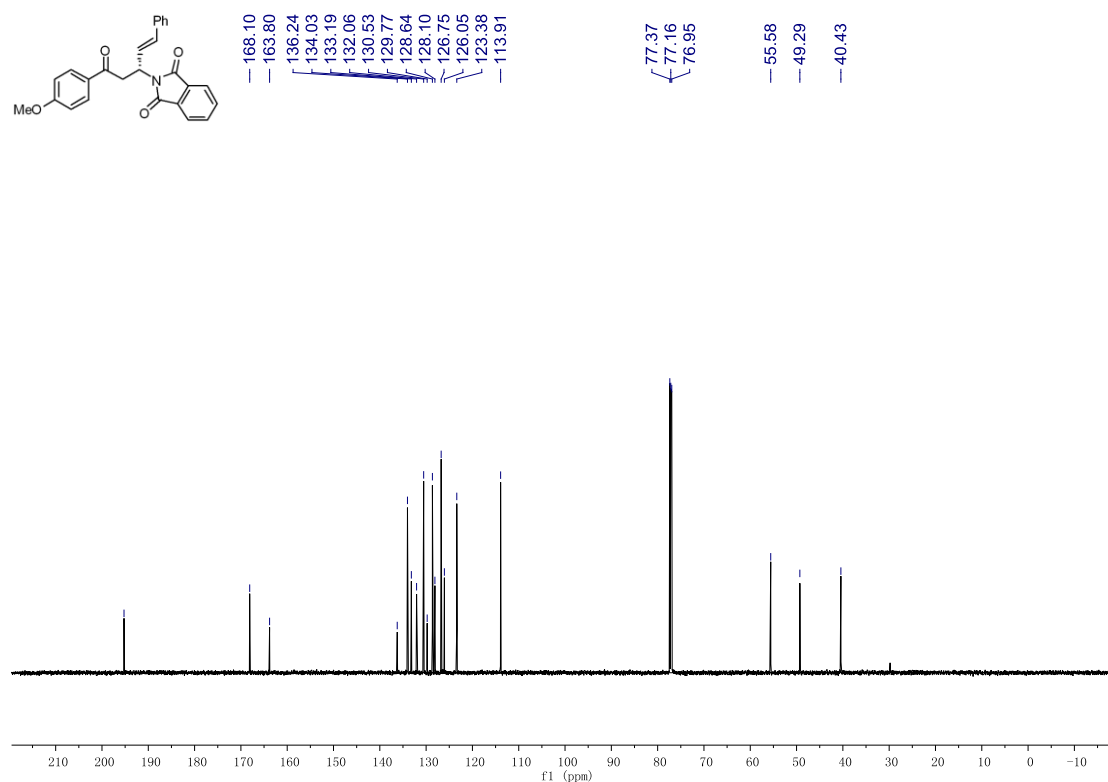

**(*R,E*)-2-(5-(4-fluorophenyl)-5-oxo-1-phenylpent-1-en-3-yl)isoindoline-1,3-dione (3fa)**

$^1\text{H}$  NMR (600 MHz,  $\text{CDCl}_3$ )

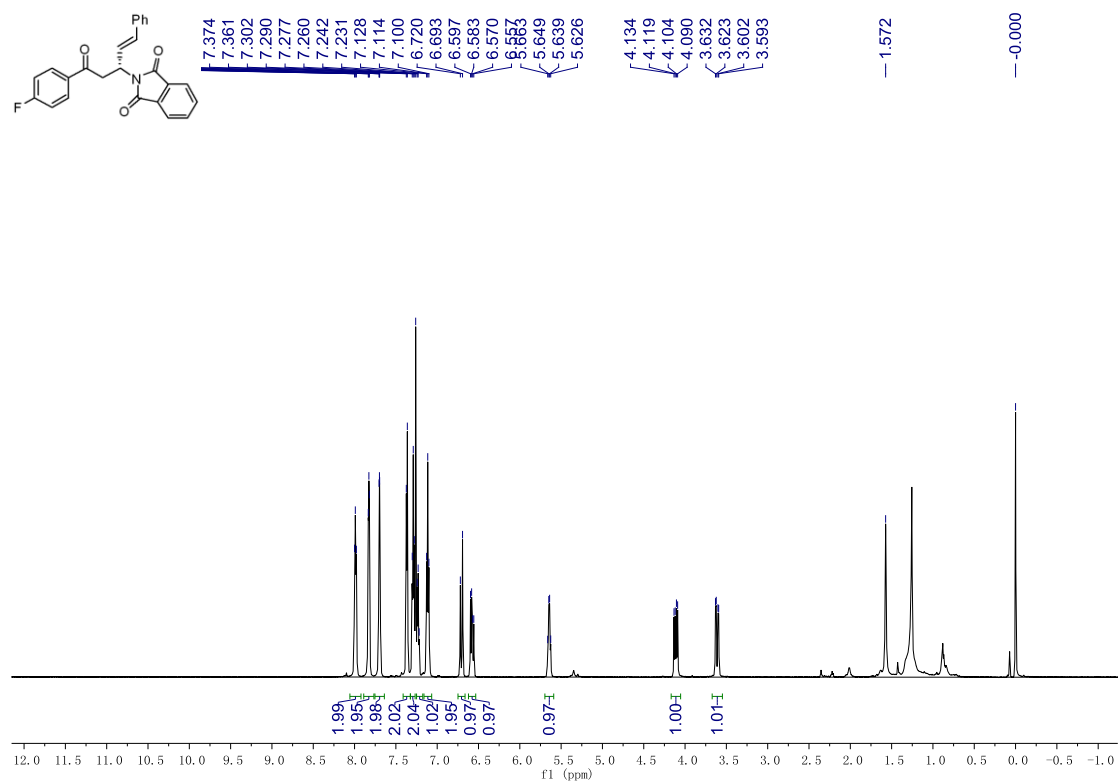

$^{13}\text{C} \{^1\text{H}\}$  NMR (150 MHz,  $\text{CDCl}_3$ )

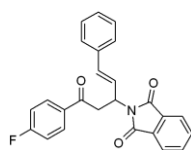

168.12  
166.90  
165.21  
136.15  
134.15  
133.49  
133.12  
133.10  
132.04  
130.97  
130.90  
128.71  
128.24  
126.79  
125.74  
123.47  
116.02  
115.87

77.37  
77.16  
76.95

49.16  
40.78

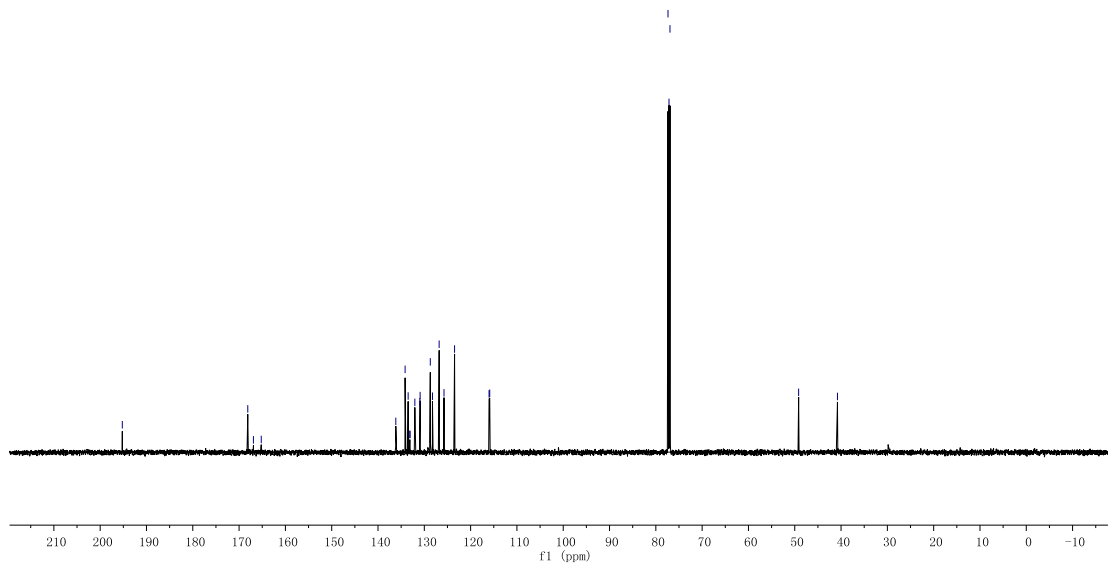

$^{19}\text{F} \{^1\text{H}\}$  NMR (564 MHz,  $\text{CDCl}_3$ )

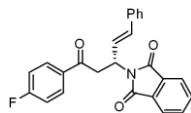

-104.61

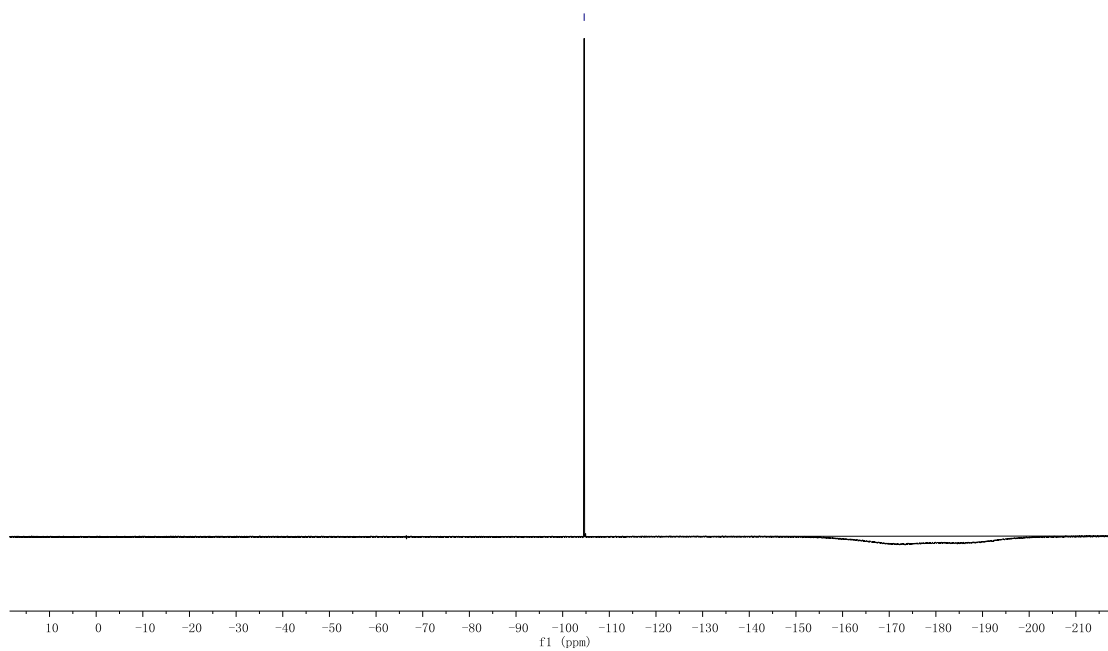

**(*R,E*)-2-(5-(4-chlorophenyl)-5-oxo-1-phenylpent-1-en-3-yl)isoindoline-1,3-dione (3ga)**

$^1\text{H}$  NMR (600 MHz,  $\text{CDCl}_3$ )

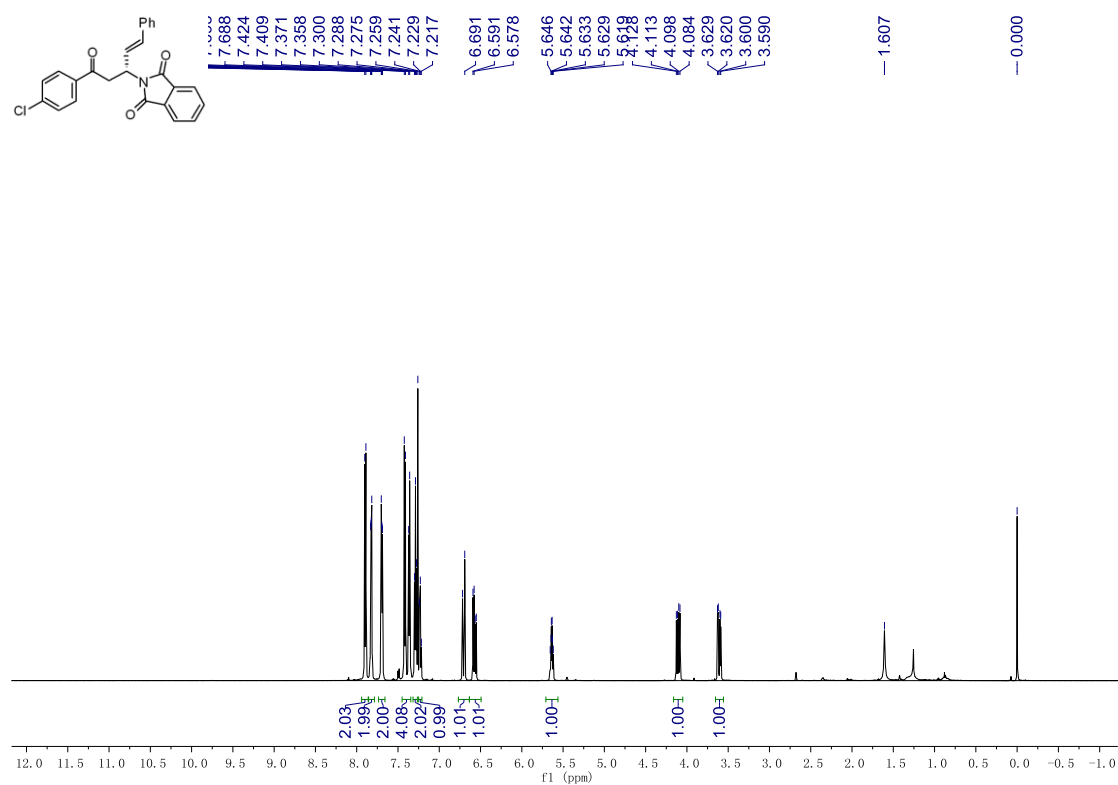

$^{13}\text{C}$  { $^1\text{H}$ } NMR (150 MHz,  $\text{CDCl}_3$ )

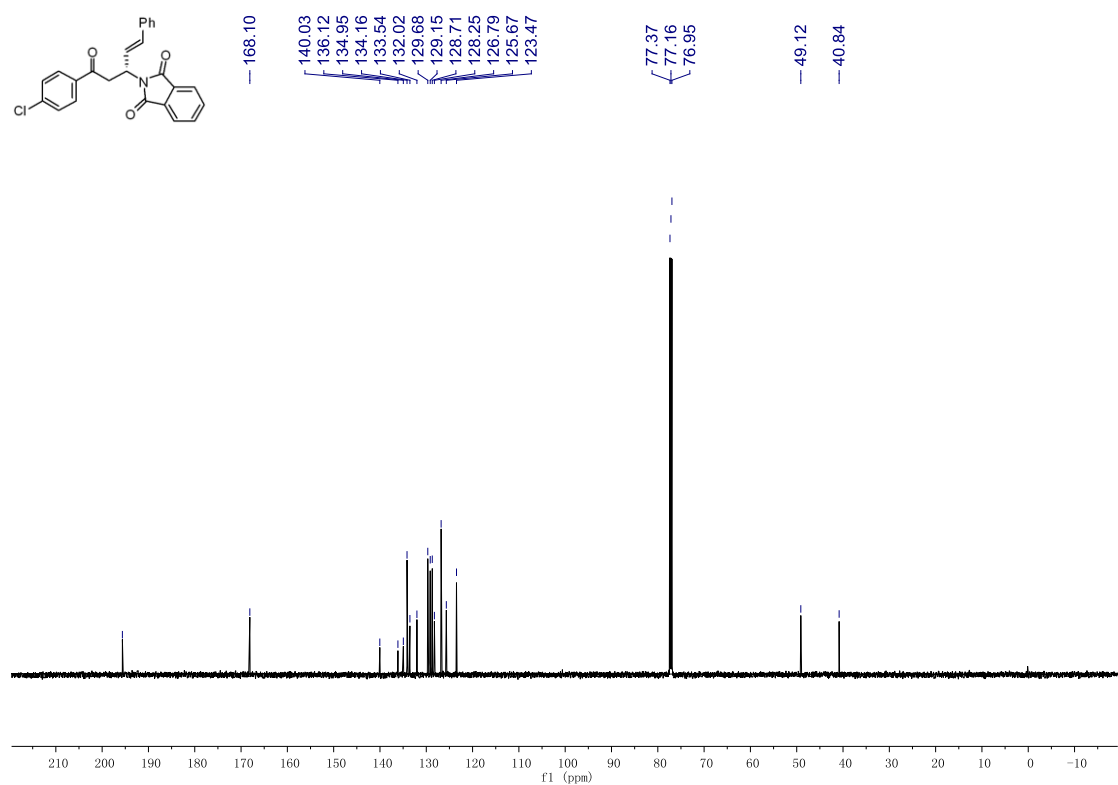

**(*R,E*)-2-(5-(4-bromophenyl)-5-oxo-1-phenylpent-1-en-3-yl)isoindoline-1,3-dione (3ha)**

$^1\text{H}$  NMR (400 MHz,  $\text{CDCl}_3$ )

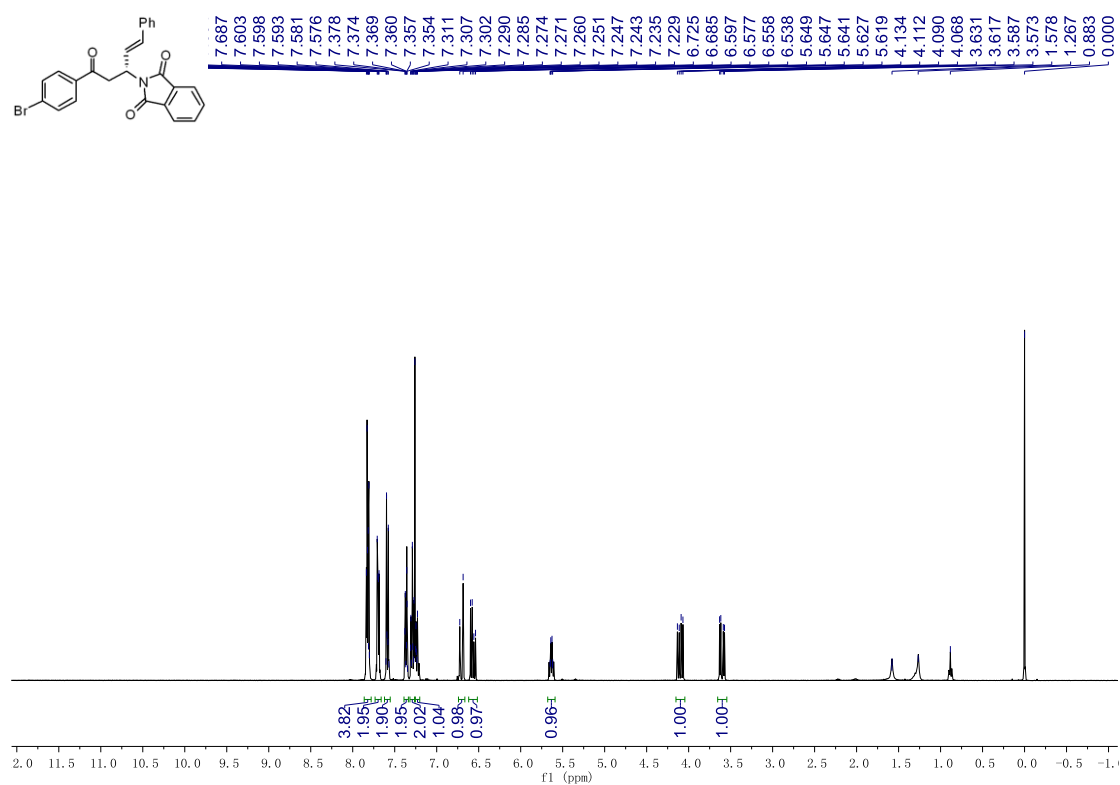

$^{13}\text{C}$  { $^1\text{H}$ } NMR (150 MHz,  $\text{CDCl}_3$ )

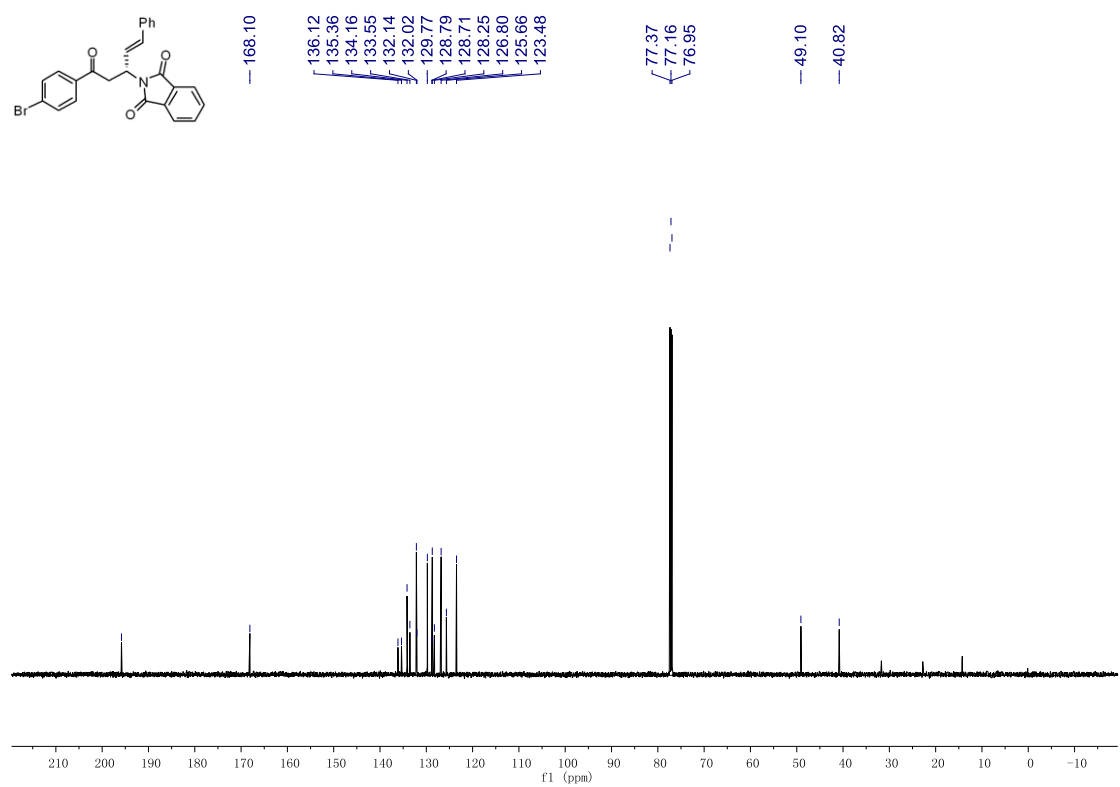

**(*R,E*)-2-(5-(3-bromophenyl)-5-oxo-1-phenylpent-1-en-3-yl)isoindoline-1,3-dione**  
**(3ia)**

$^1\text{H}$  NMR (400 MHz,  $\text{CDCl}_3$ )

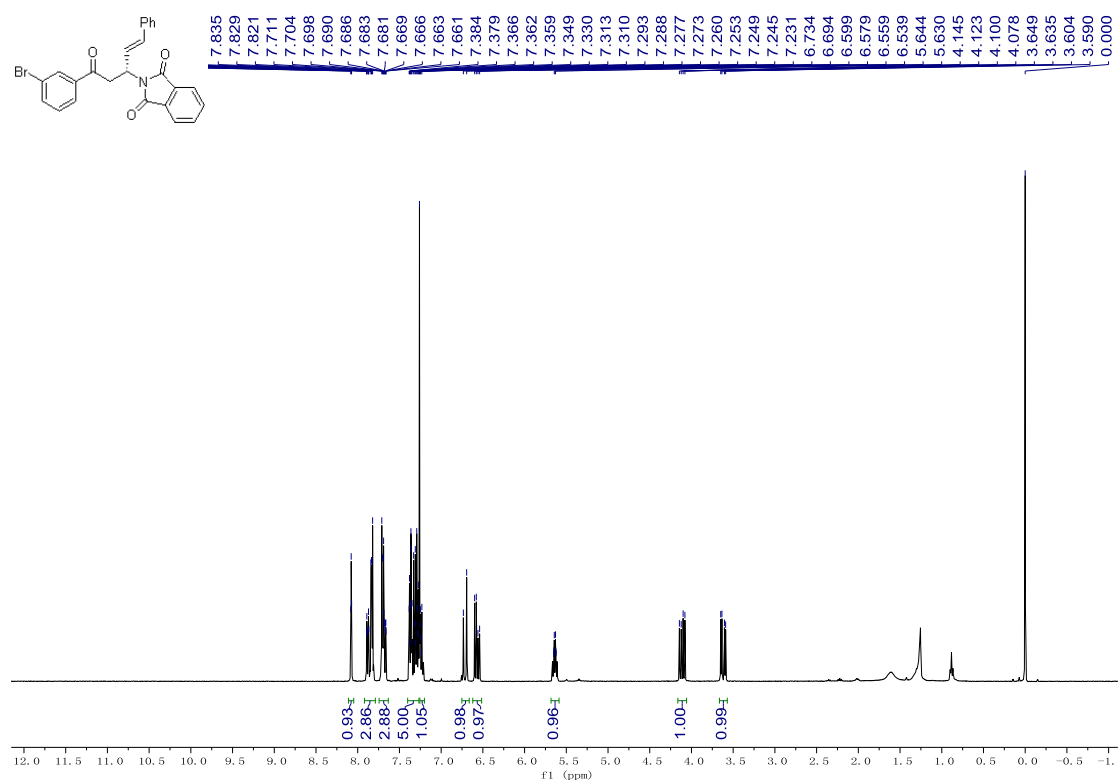

$^{13}\text{C}$  { $^1\text{H}$ } NMR (150 MHz,  $\text{CDCl}_3$ )

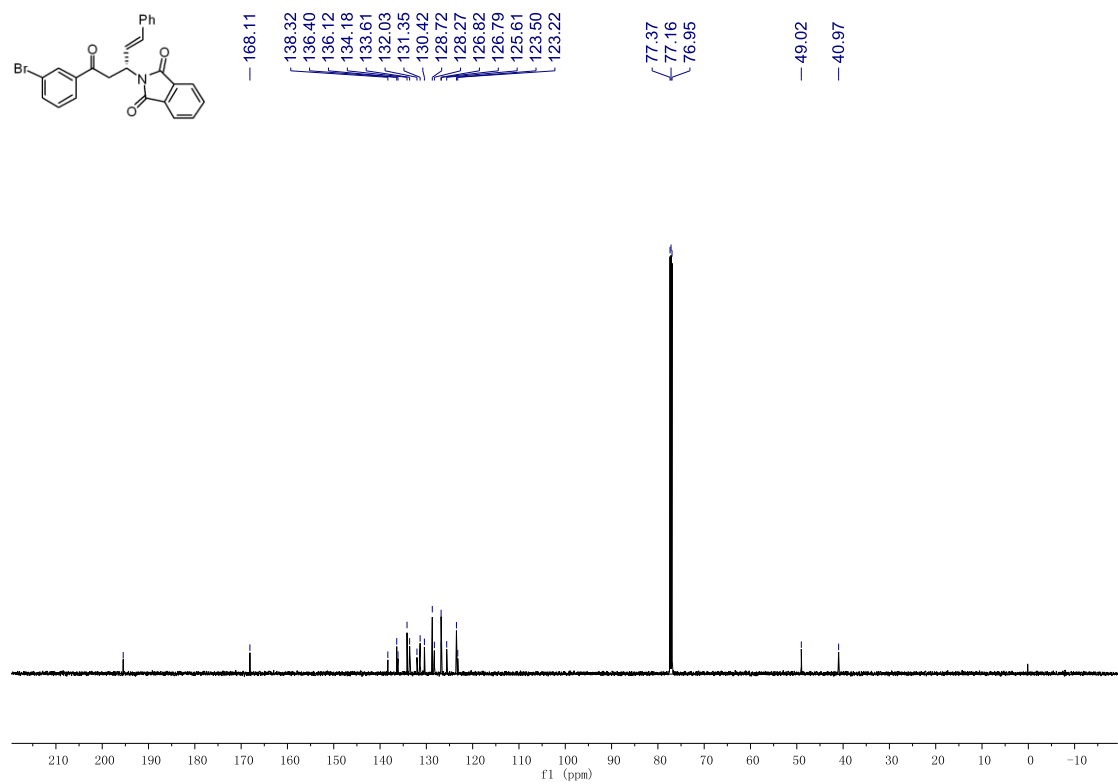



**(*R,E*)-2-(5-(2-bromophenyl)-5-oxo-1-phenylpent-1-en-3-yl)isoindoline-1,3-dione**  
**(3ja)**

$^1\text{H}$  NMR (600 MHz,  $\text{CDCl}_3$ )

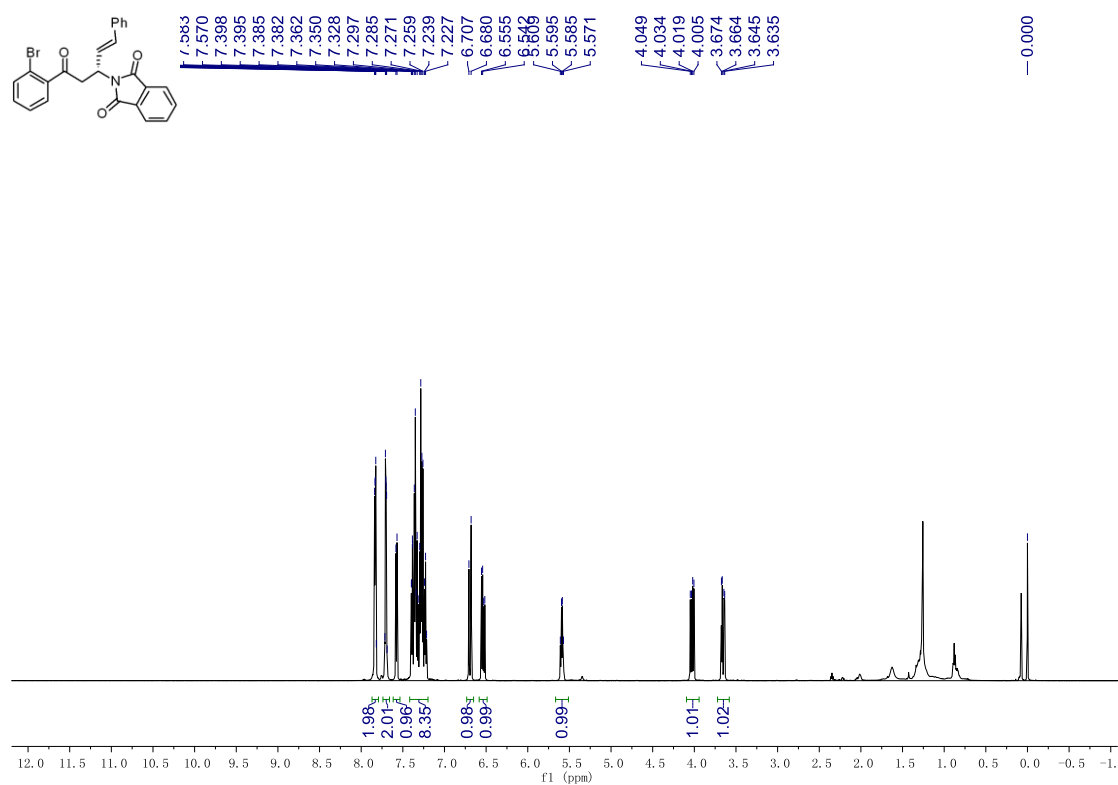

$^{13}\text{C}$  { $^1\text{H}$ } NMR (100 MHz,  $\text{CDCl}_3$ )

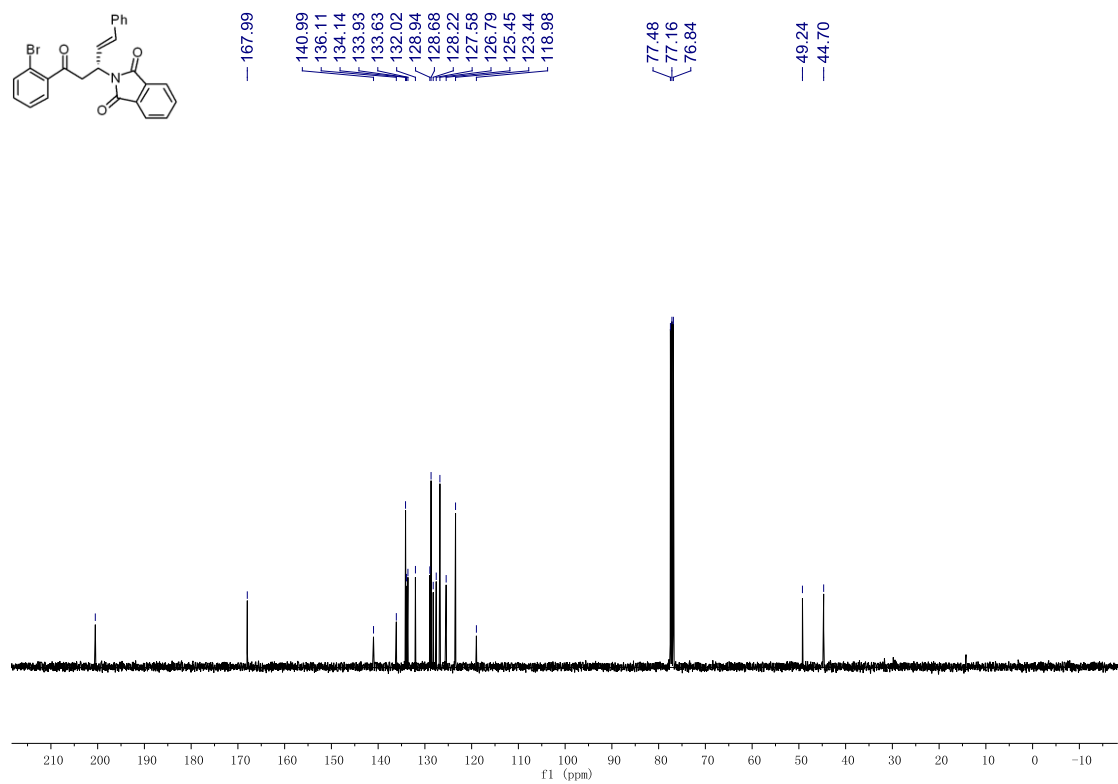

**(*R,E*)-2-(5-oxo-1-phenyl-5-(4-(trifluoromethyl)phenyl)pent-1-en-3-yl)isoindoline-1,3-dione (3ka)**

$^1\text{H}$  NMR (400 MHz,  $\text{CDCl}_3$ )

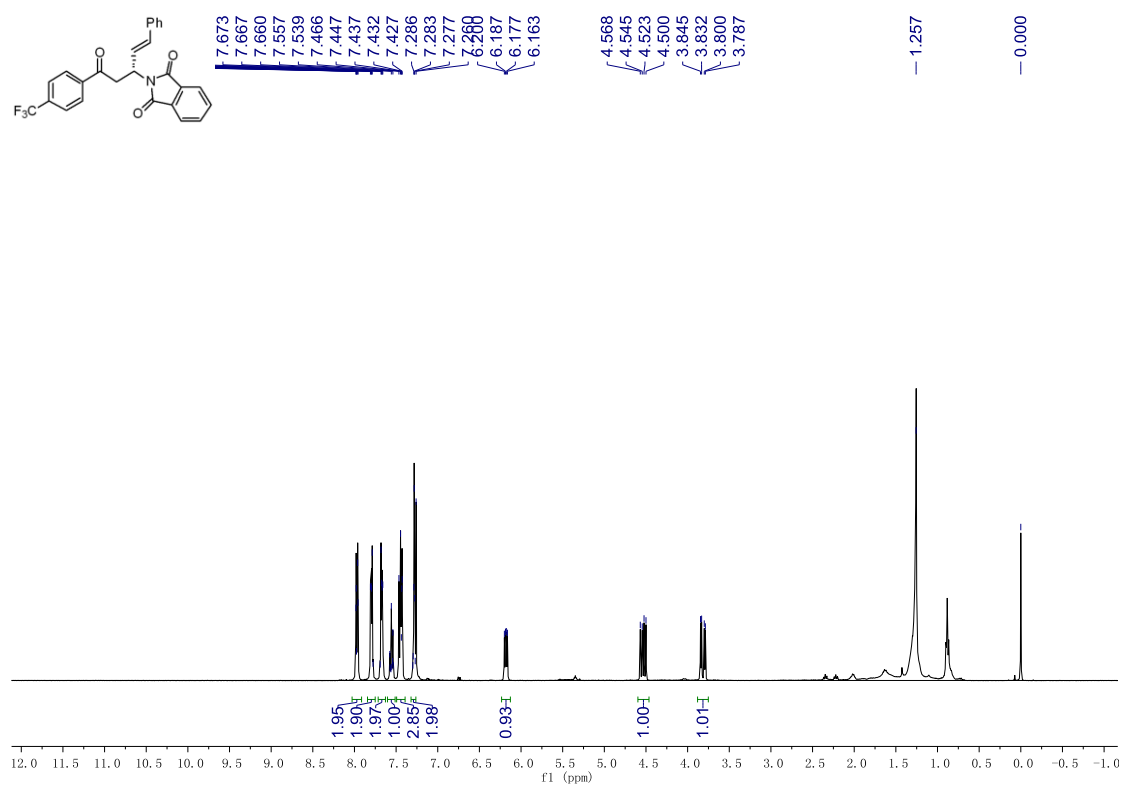

$^{13}\text{C}$  { $^1\text{H}$ } NMR (150 MHz,  $\text{CDCl}_3$ )

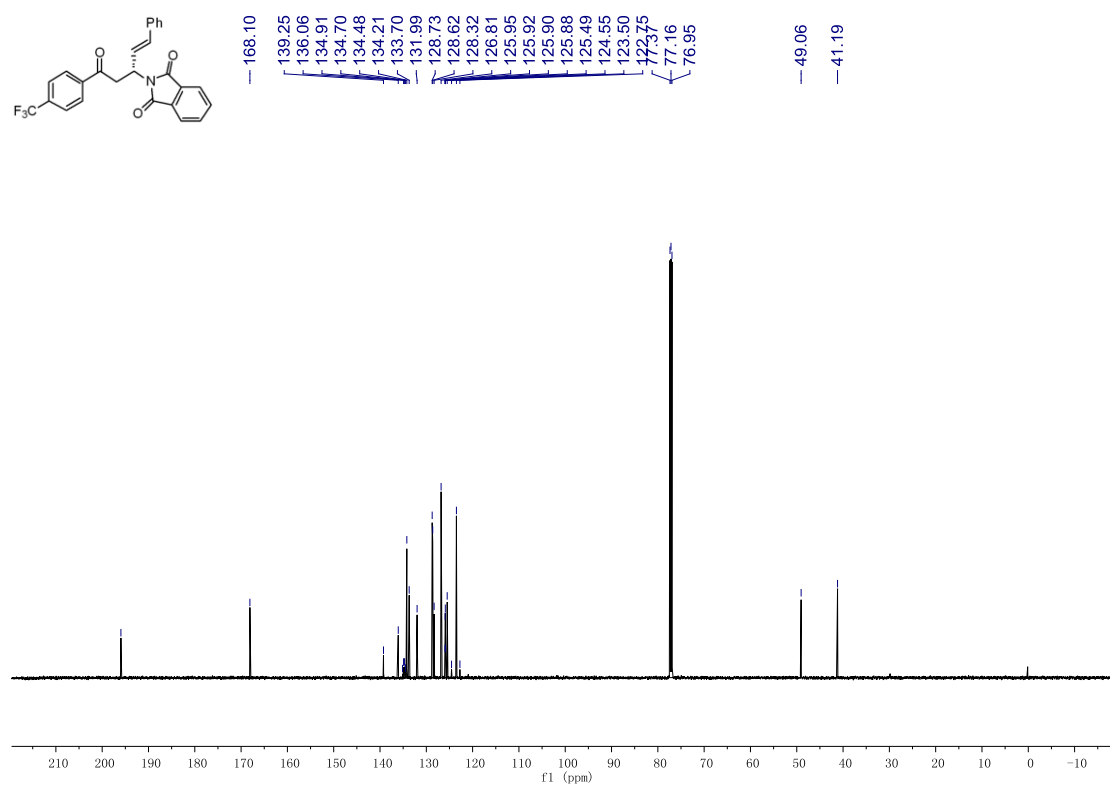

$^{19}\text{F}$   $\{^1\text{H}\}$  NMR (564 MHz,  $\text{CDCl}_3$ )

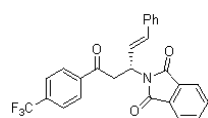

-63.16

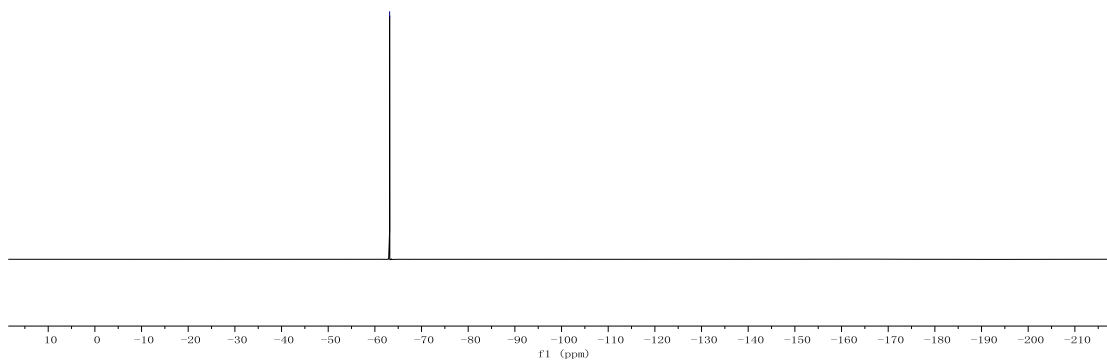

**(*R,E*)-2-(5-(4-nitrophenyl)-5-oxo-1-phenylpent-1-en-3-yl)isoindoline-1,3-dione (3la)**

$^1\text{H}$  NMR (600 MHz,  $\text{CDCl}_3$ )

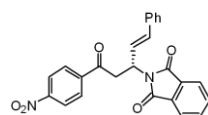

8.105  
8.101  
7.843  
7.838  
7.834  
7.829  
7.823  
7.821  
7.728  
7.726  
7.720  
7.715  
7.711  
7.706  
7.699  
7.689  
7.379  
7.377  
7.365  
7.310  
7.298  
7.285  
7.261  
7.255  
7.246  
7.243  
7.239  
7.231  
6.740  
6.713  
6.590  
6.576  
6.564  
6.550  
6.565  
6.655  
6.652  
6.642  
5.638  
5.628  
4.219  
4.205  
4.189  
4.175  
3.707  
3.698  
3.677  
3.668  
0.000

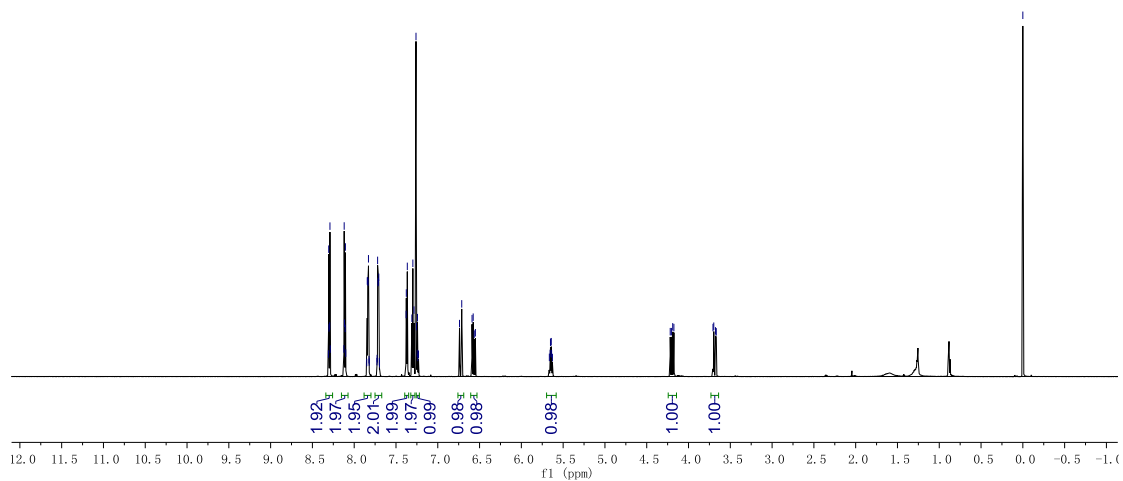

$^{13}\text{C}$  { $^1\text{H}$ } NMR (150 MHz,  $\text{CDCl}_3$ )

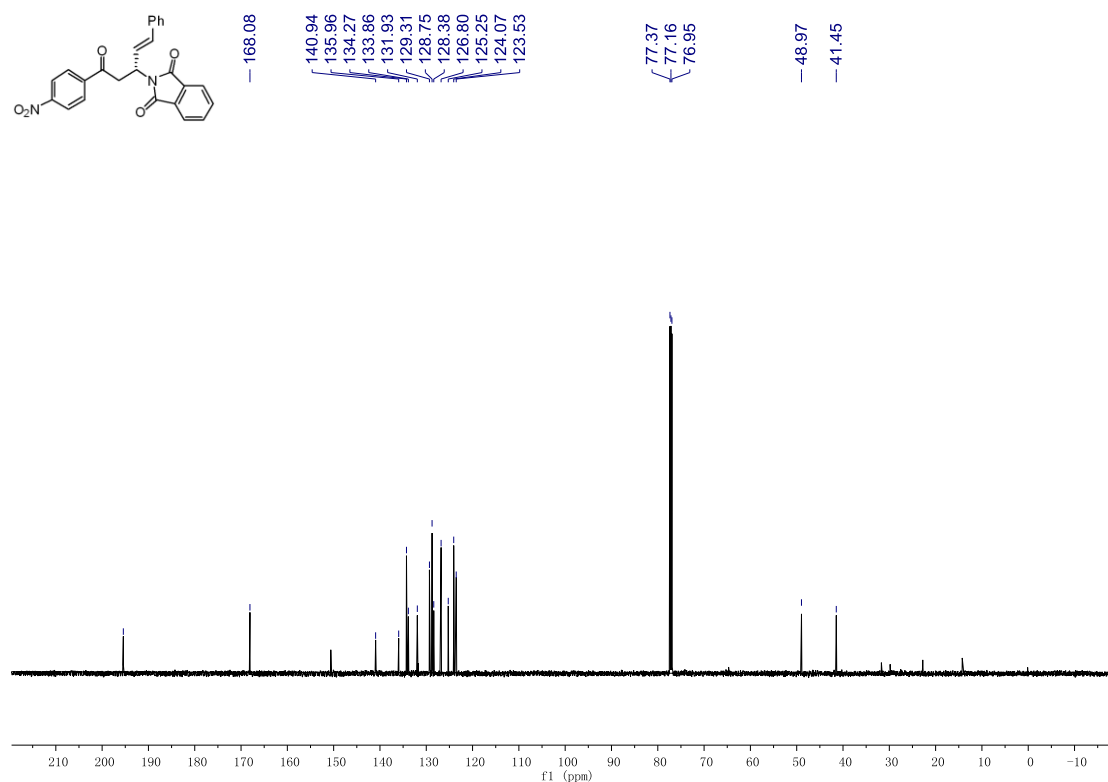

**(R,E)-2-(5-(3,4-dichlorophenyl)-5-oxo-1-phenylpent-1-en-3-yl)isoindoline-1,3-dione (3ma)**

$^1\text{H}$  NMR (600 MHz,  $\text{CDCl}_3$ )

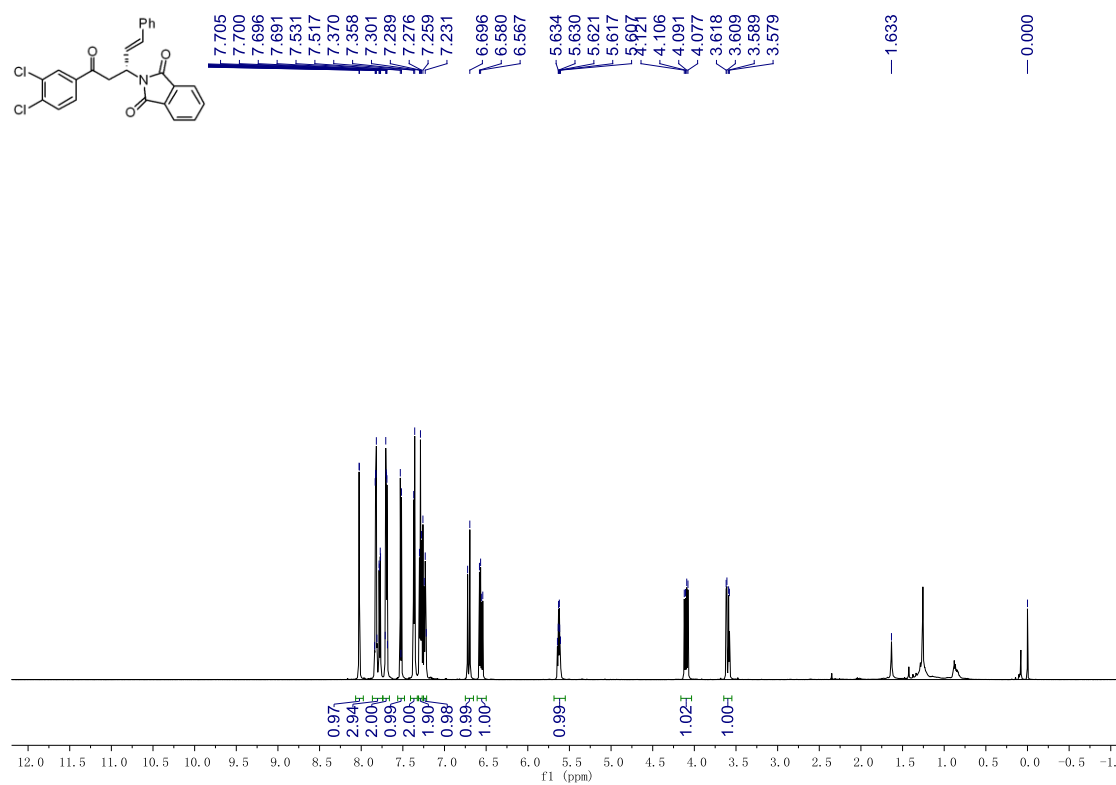

$^{13}\text{C}$  { $^1\text{H}$ } NMR (150 MHz,  $\text{CDCl}_3$ )

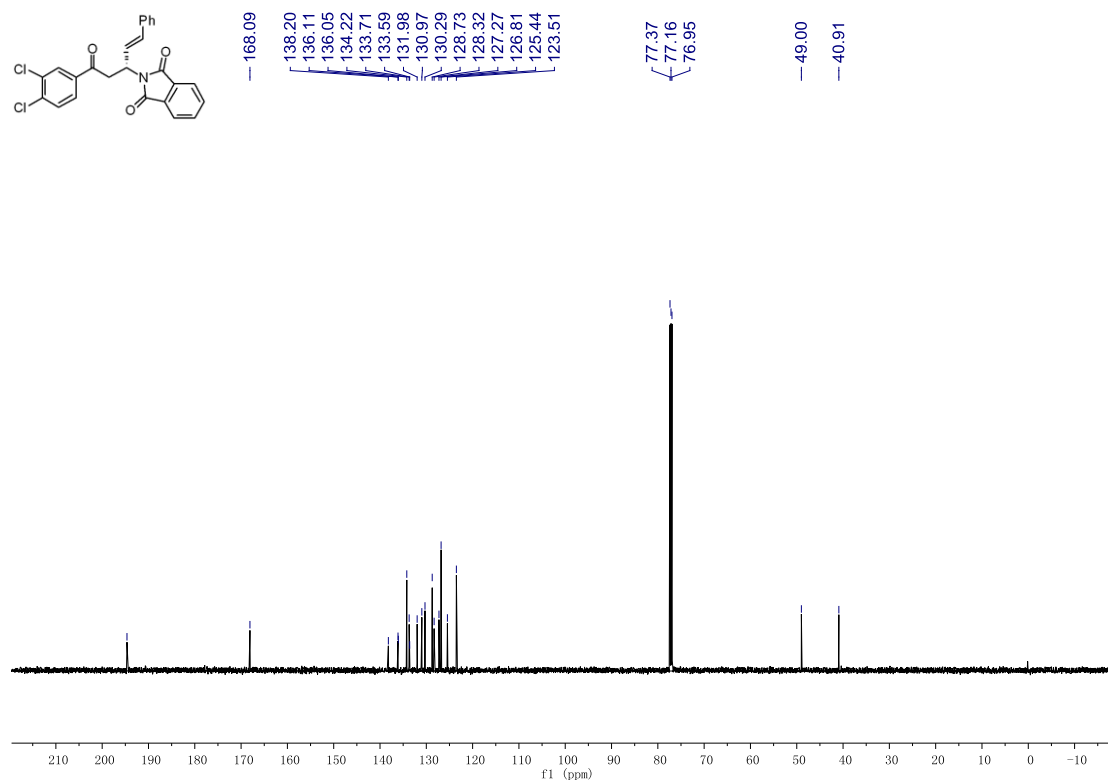

**(*R,E*)-2-(5-(naphthalen-2-yl)-5-oxo-1-phenylpent-1-en-3-yl)isoindoline-1,3-dione (3na)**

$^1\text{H}$  NMR (600 MHz,  $\text{CDCl}_3$ )

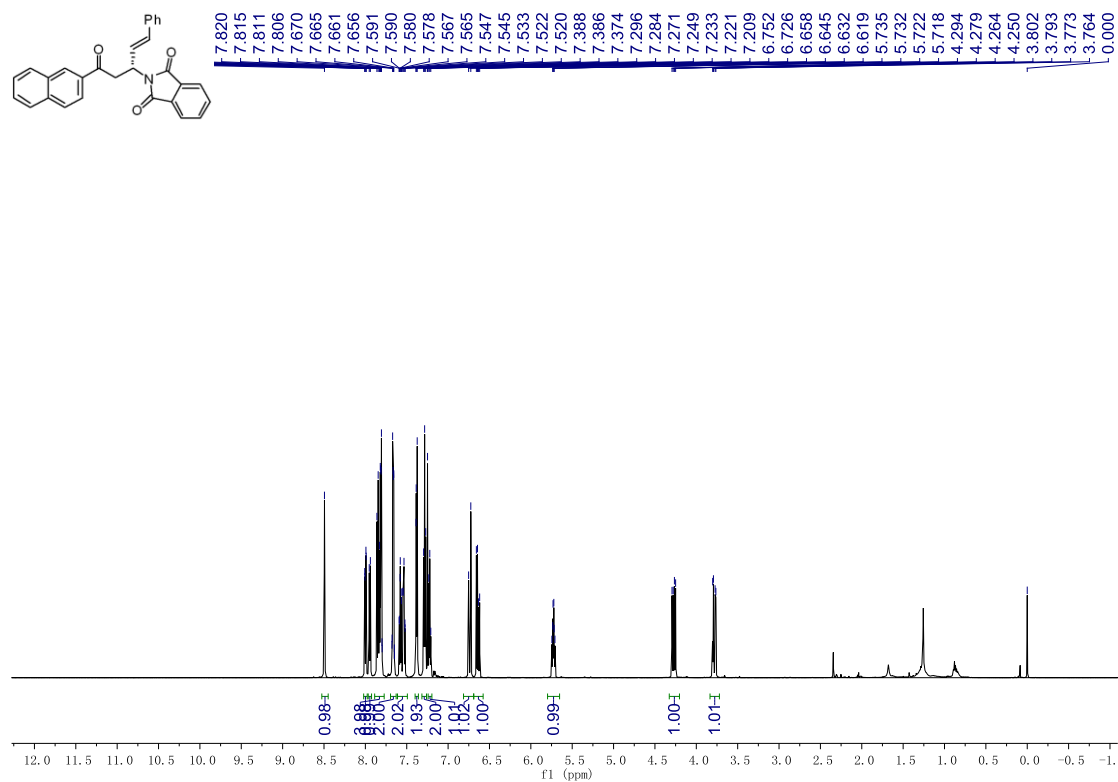

$^{13}\text{C}$  { $^1\text{H}$ } NMR (150 MHz,  $\text{CDCl}_3$ )

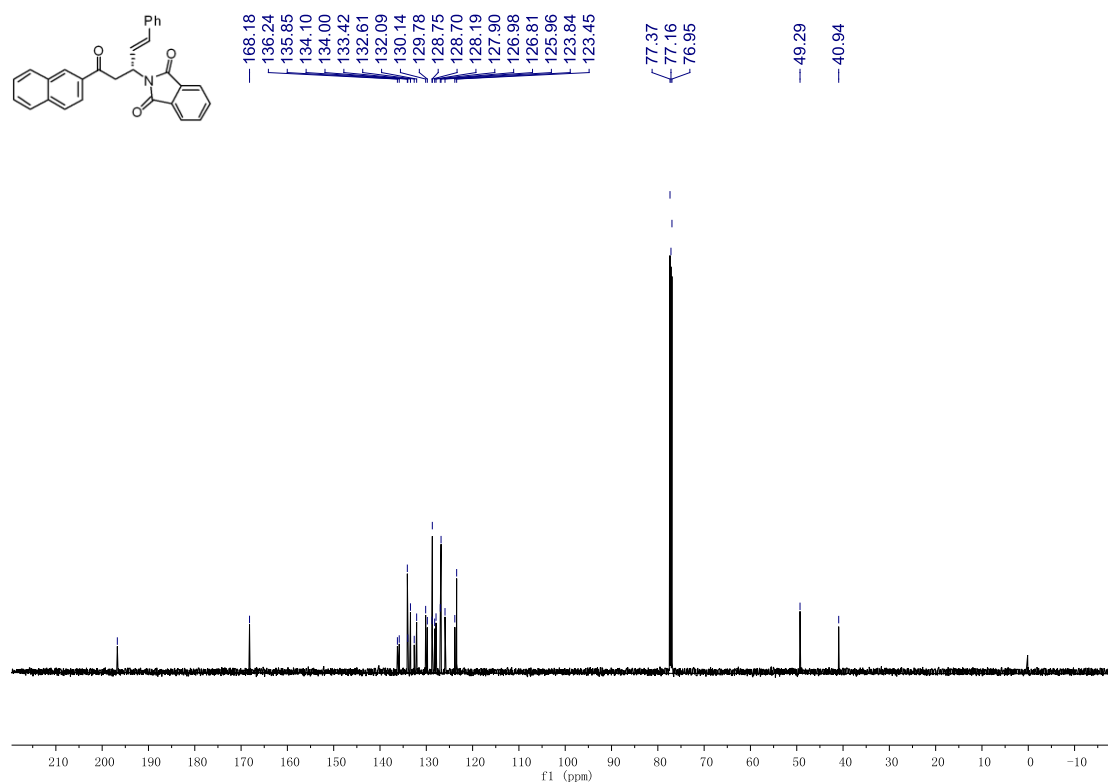

**(R,E)-2-(5-(naphthalen-1-yl)-5-oxo-1-phenylpent-1-en-3-yl)isoindoline-1,3-dione (30a)**

$^1\text{H}$  NMR (400 MHz,  $\text{CDCl}_3$ )

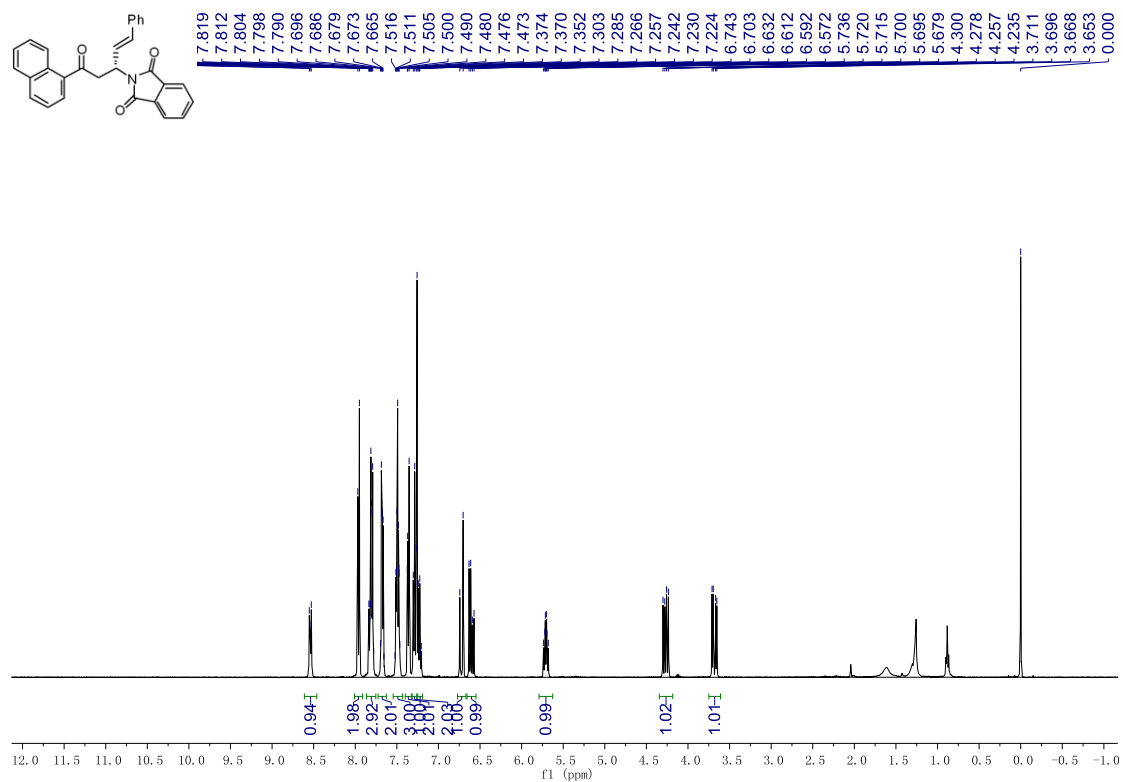

$^{13}\text{C}$  { $^1\text{H}$ } NMR (100 MHz,  $\text{CDCl}_3$ )

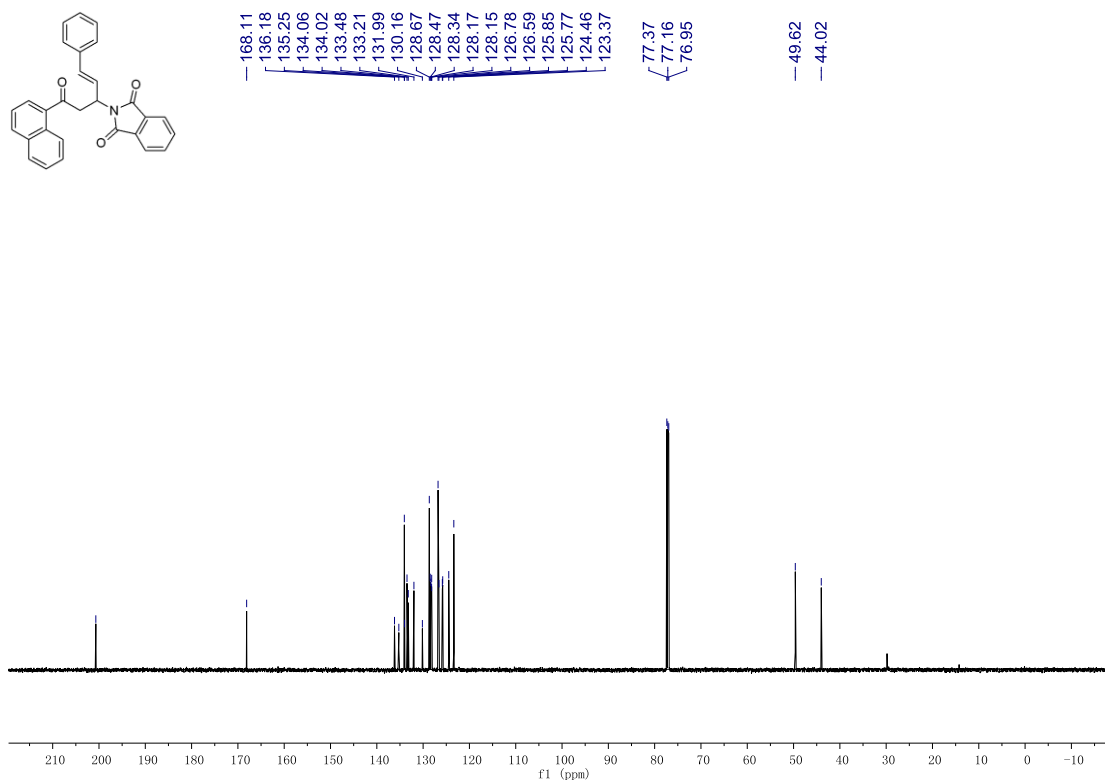

**(R,E)-2-(5-(furan-2-yl)-5-oxo-1-phenylpent-1-en-3-yl)isoindoline-1,3-dione (3pa)**

$^1\text{H}$  NMR (400 MHz,  $\text{CDCl}_3$ )

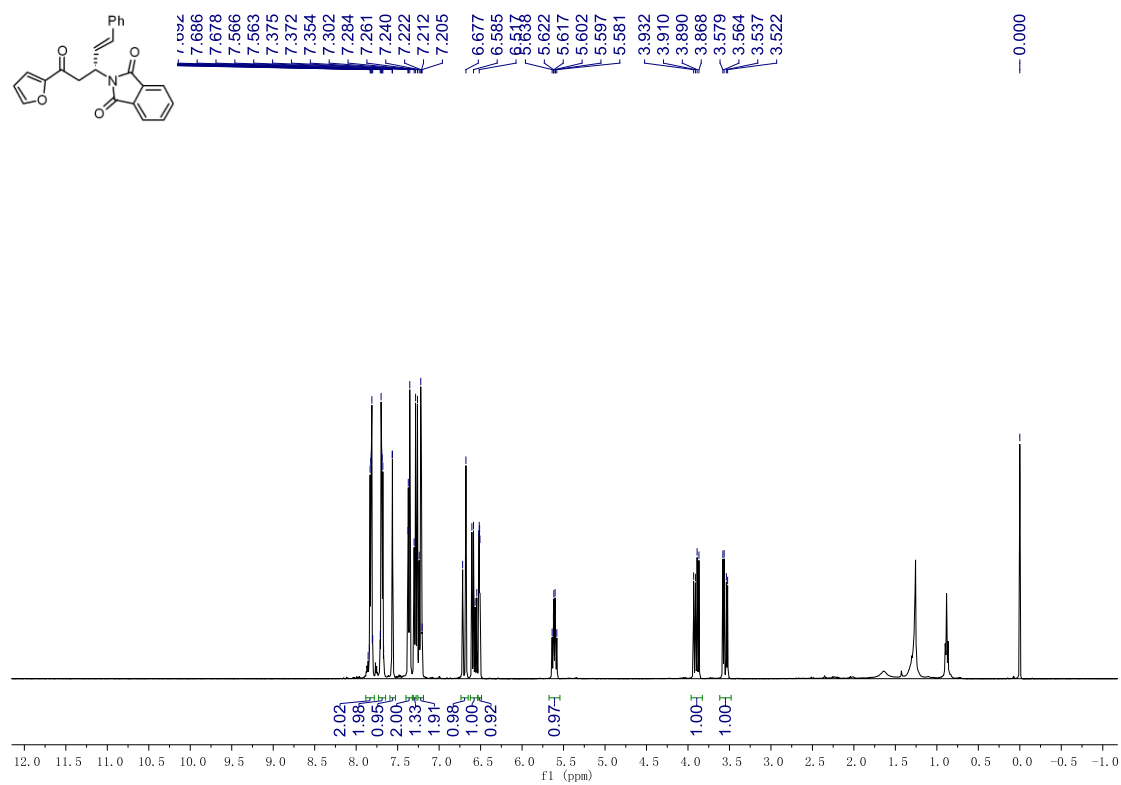

$^{13}\text{C}$  { $^1\text{H}$ } NMR (100 MHz,  $\text{CDCl}_3$ )

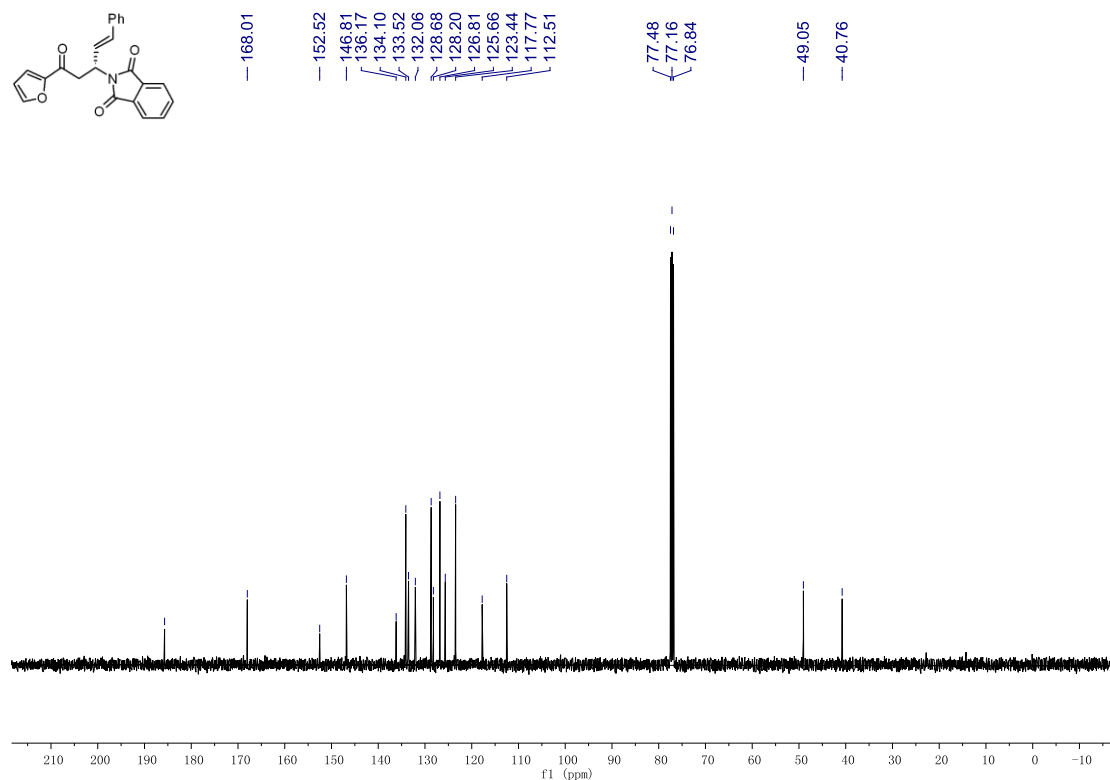

**(R,E)-2-(5-oxo-1-phenyl-5-(thiophen-2-yl)pent-1-en-3-yl)isoindoline-1,3-dione (3qa)**

$^1\text{H}$  NMR (400 MHz,  $\text{CDCl}_3$ )

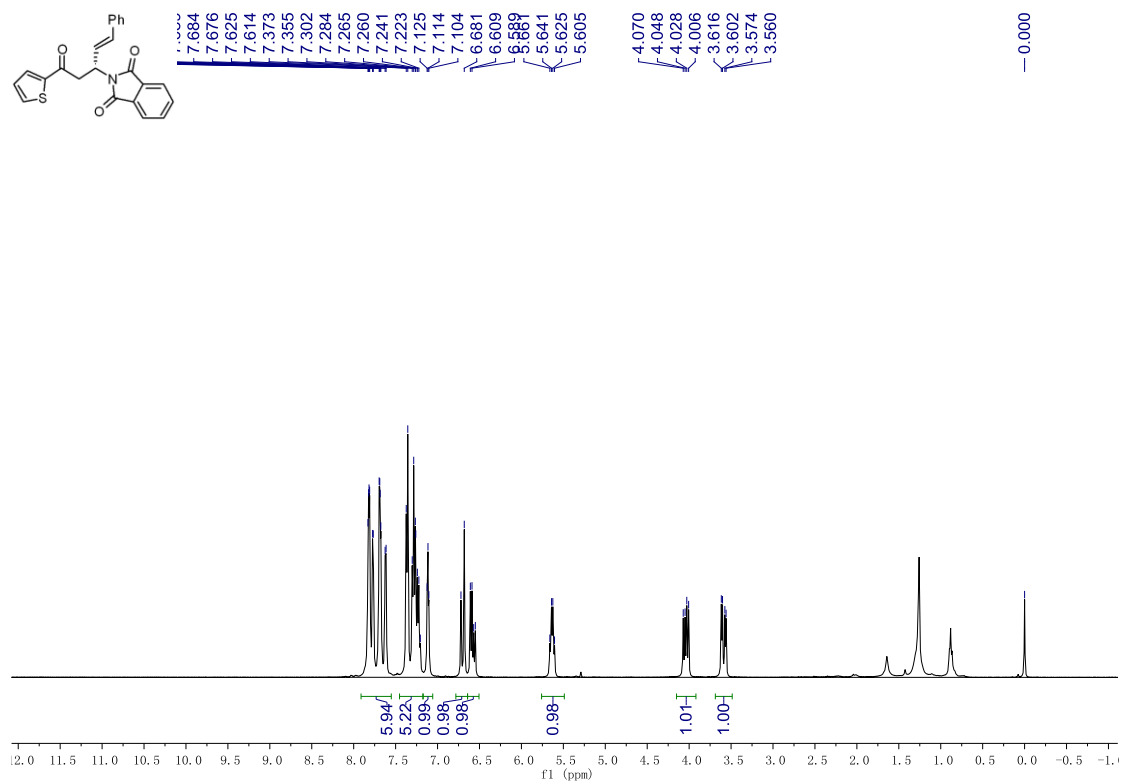



$^{13}\text{C}$  { $^1\text{H}$ } NMR (100 MHz,  $\text{CDCl}_3$ )

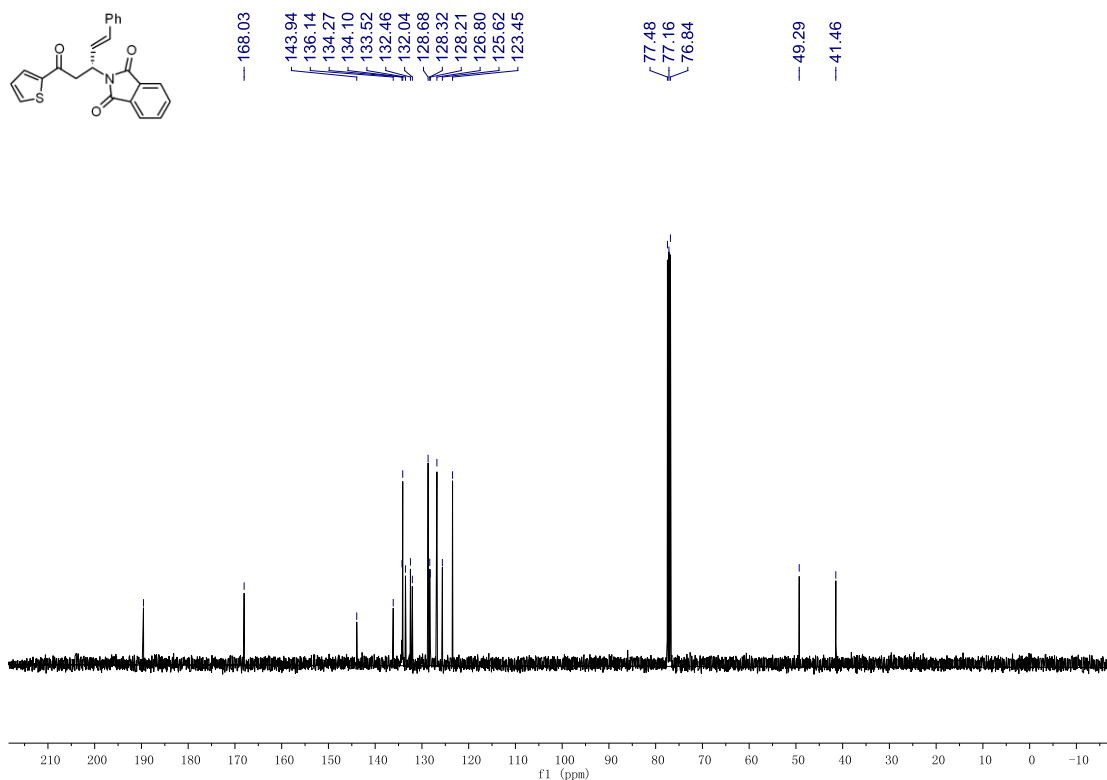

**(R,E)-2-(5-oxo-1-phenyl-5-(thiophen-3-yl)pent-1-en-3-yl)isoindoline-1,3-dione (3ra)**

$^1\text{H}$  NMR (400 MHz,  $\text{CDCl}_3$ )

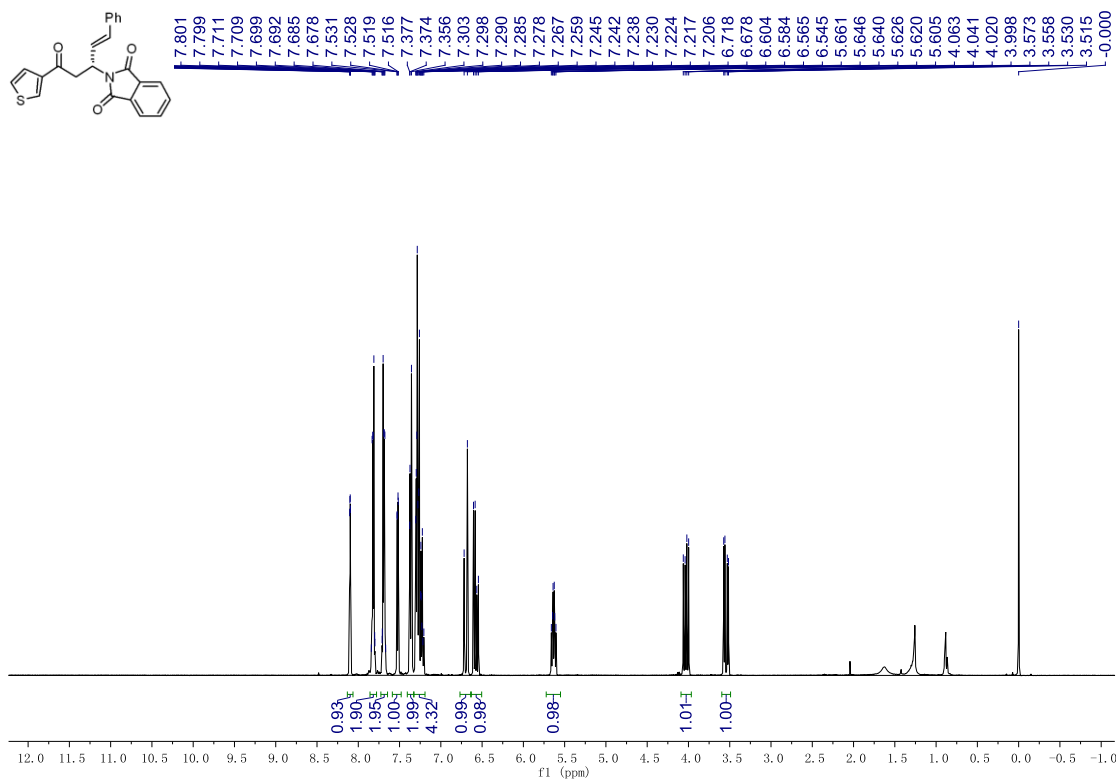

$^{13}\text{C}$  { $^1\text{H}$ } NMR (100 MHz,  $\text{CDCl}_3$ )

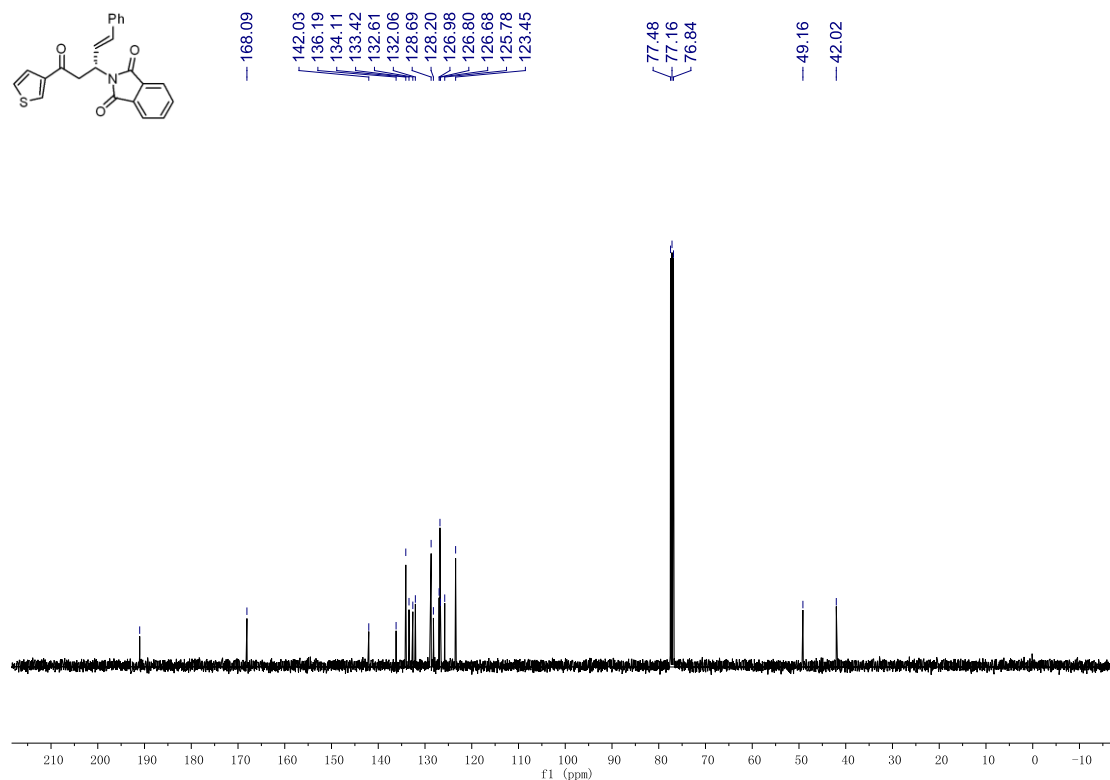

**(R,E)-2-(5-oxo-1-phenylhex-1-en-3-yl)isoindoline-1,3-dione (3sa)**

$^1\text{H}$  NMR (600 MHz,  $\text{CDCl}_3$ )

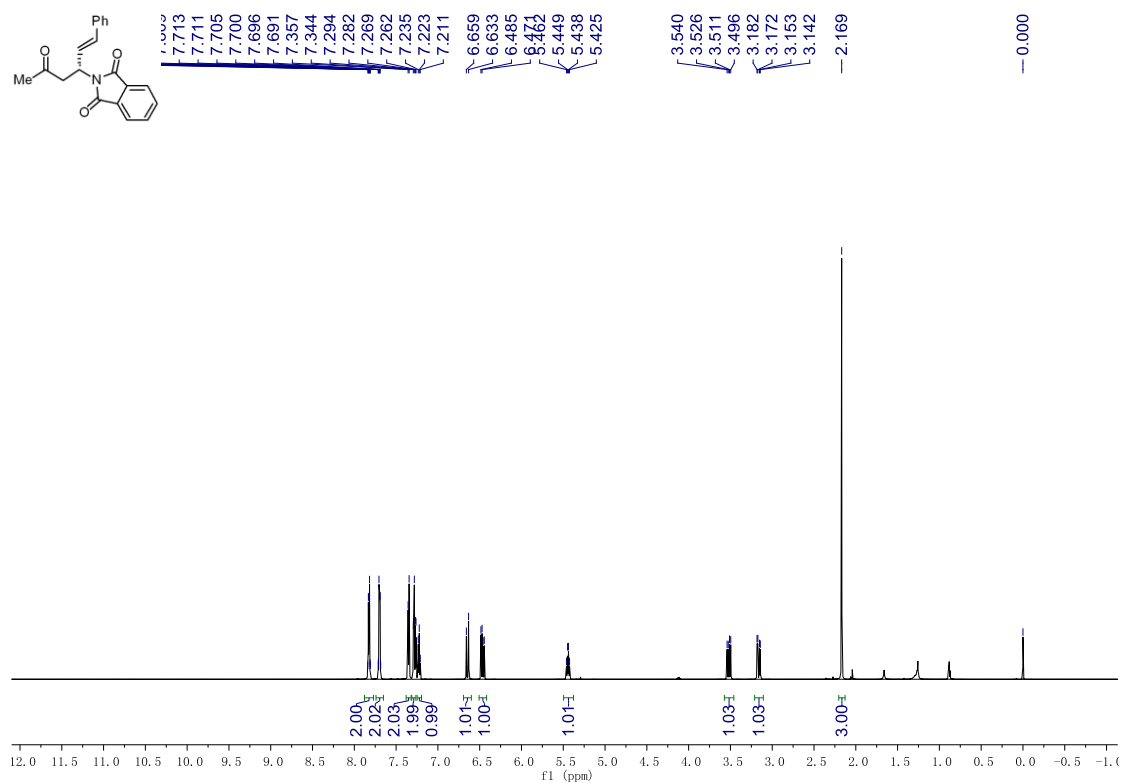

$^{13}\text{C}$   $\{^1\text{H}\}$  NMR (150 MHz,  $\text{CDCl}_3$ )

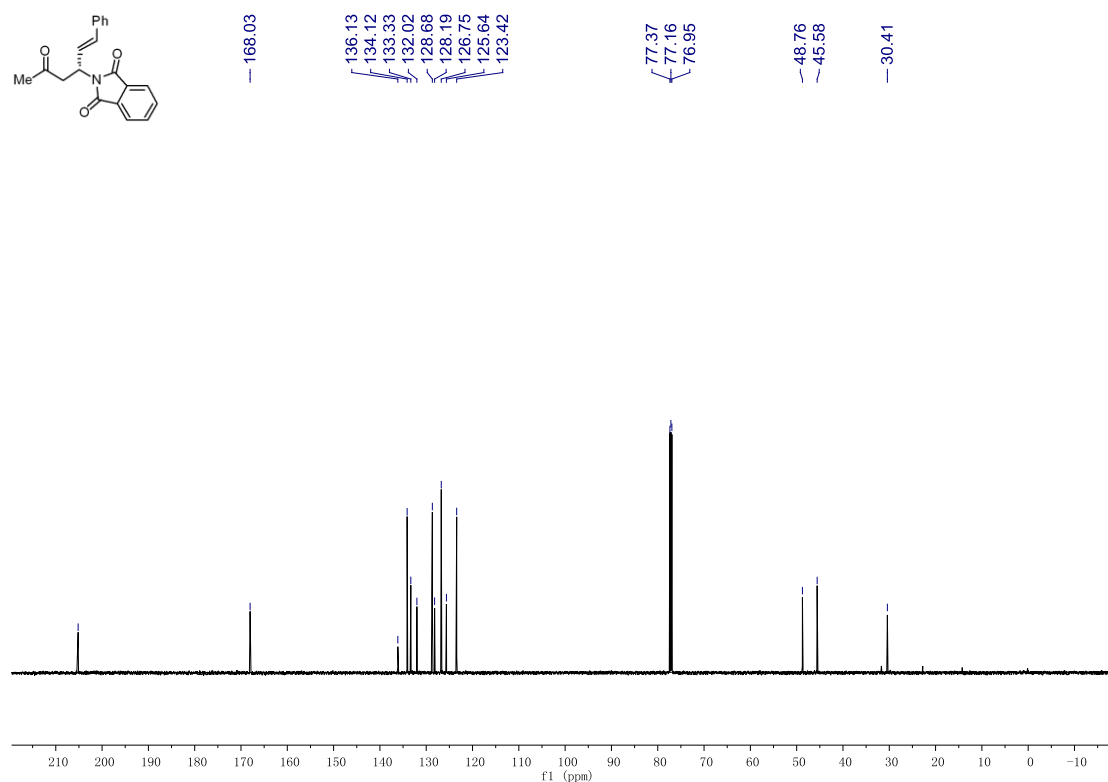

**(R,E)-2-(5-cyclohexyl-5-oxo-1-phenylpent-1-en-3-yl)isoindoline-1,3-dione (3ta)**

$^1\text{H}$  NMR (600 MHz,  $\text{CDCl}_3$ )

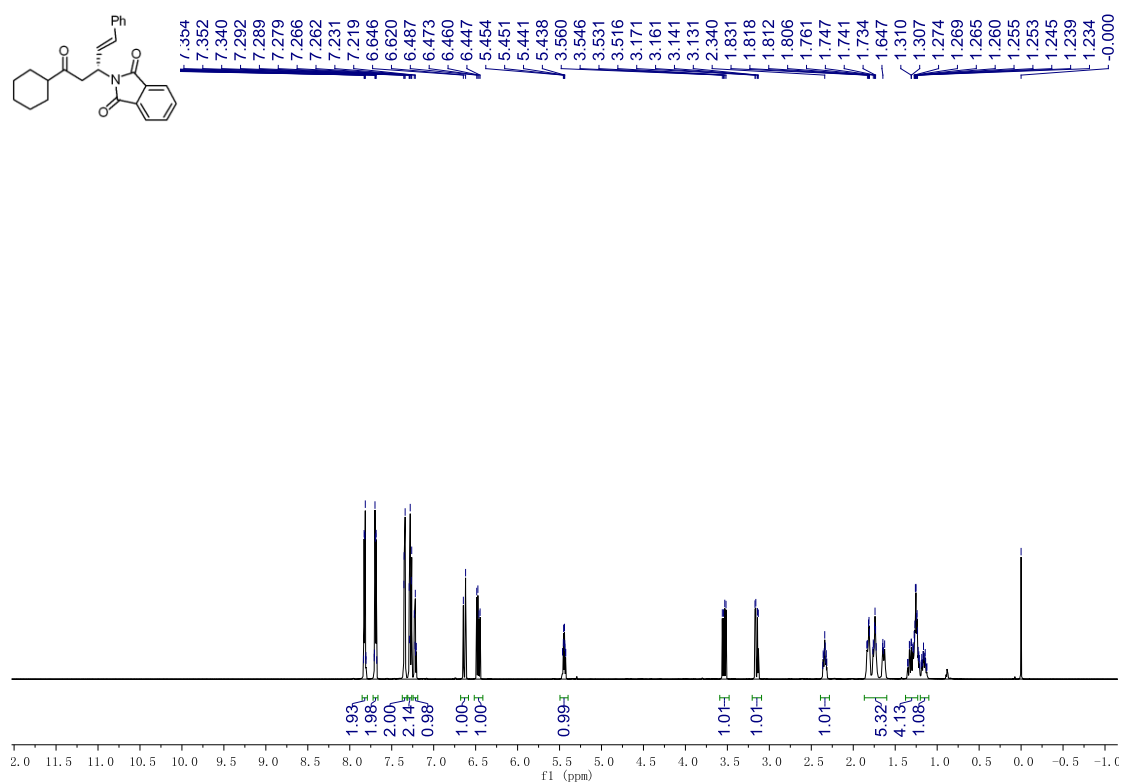

$^{13}\text{C}$  { $^1\text{H}$ } NMR (150 MHz,  $\text{CDCl}_3$ )

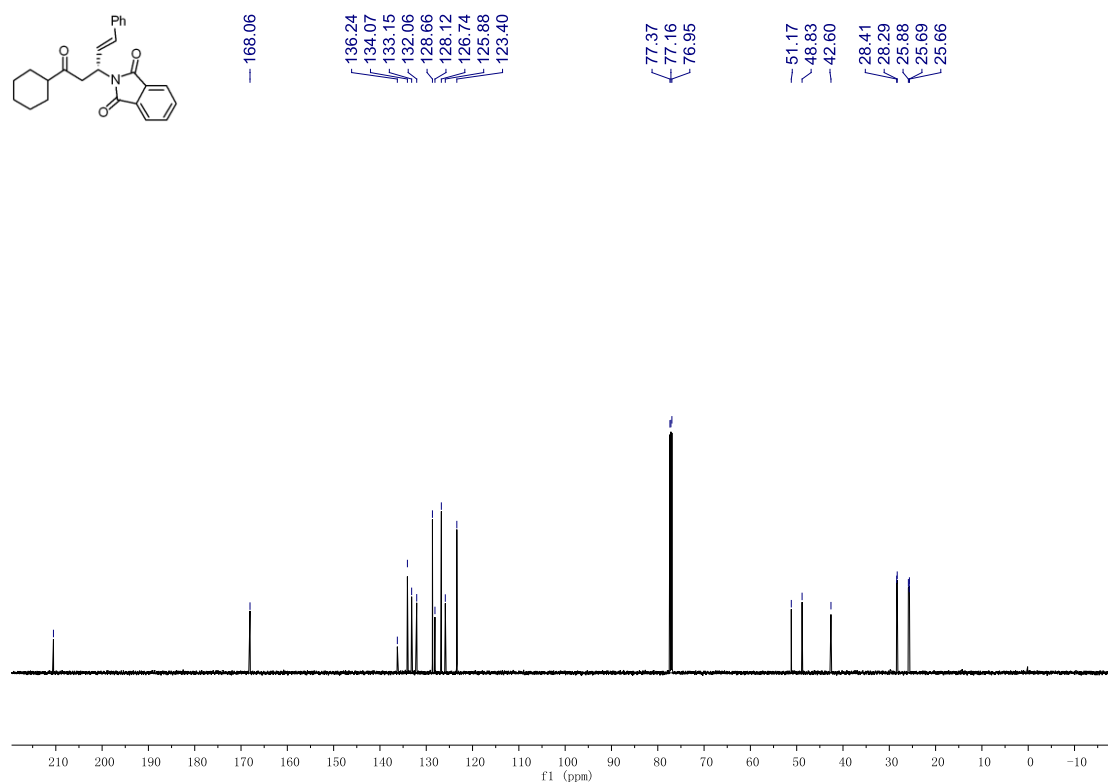

**(R,E)-1-(5-oxo-1,5-diphenylpent-1-en-3-yl)pyrrolidine-2,5-dione (3ua)**

$^1\text{H}$  NMR (600 MHz,  $\text{CDCl}_3$ )

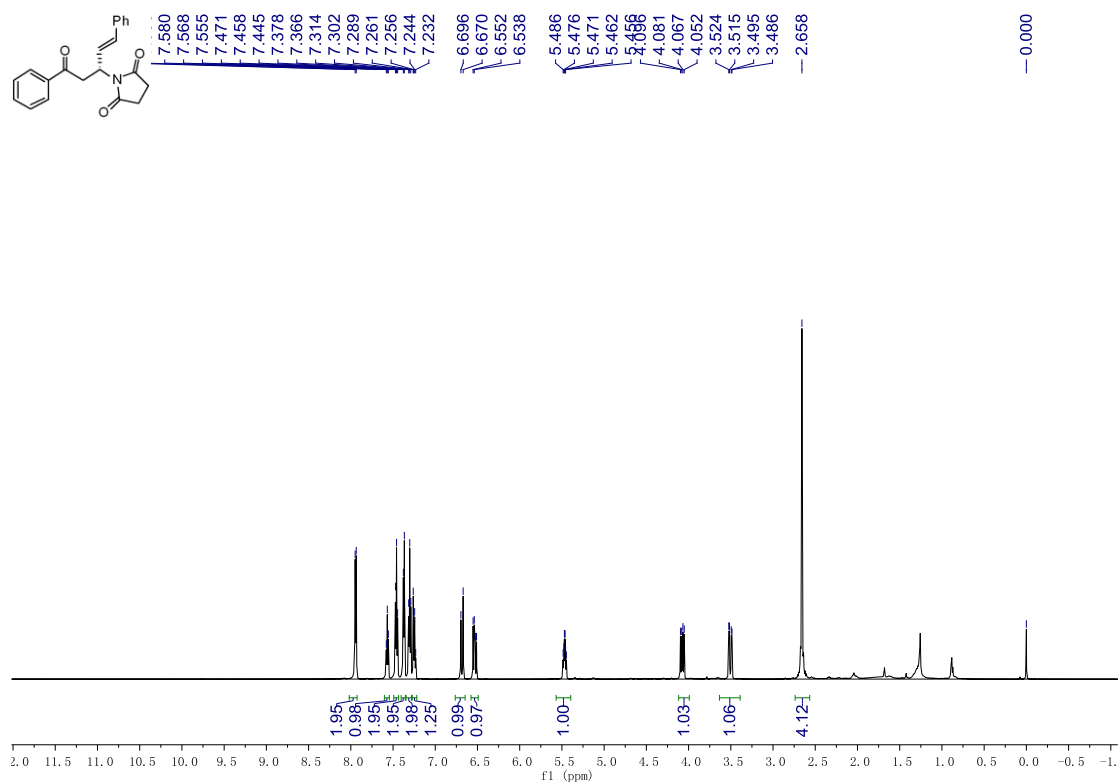

$^{13}\text{C} \{^1\text{H}\}$  NMR (150 MHz,  $\text{CDCl}_3$ )

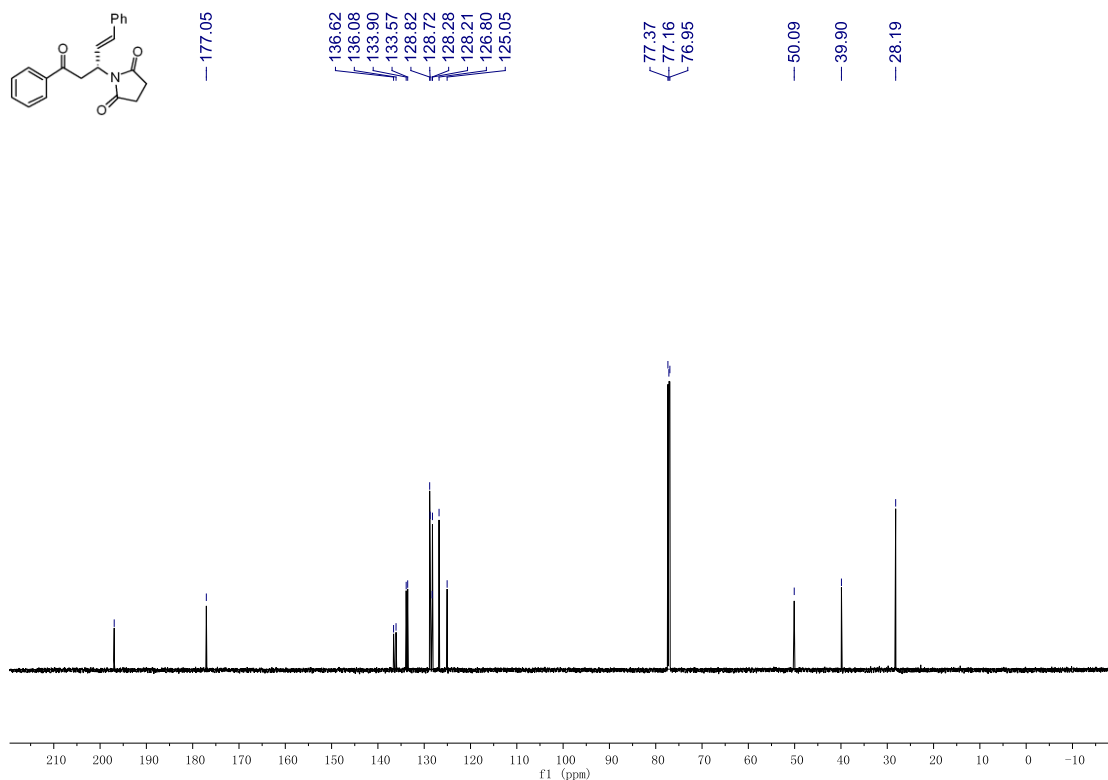

**(2E,4E)-1,5-diphenylpenta-2,4-dien-1-one (4)**

$^1\text{H}$  NMR (400 MHz,  $\text{CDCl}_3$ )

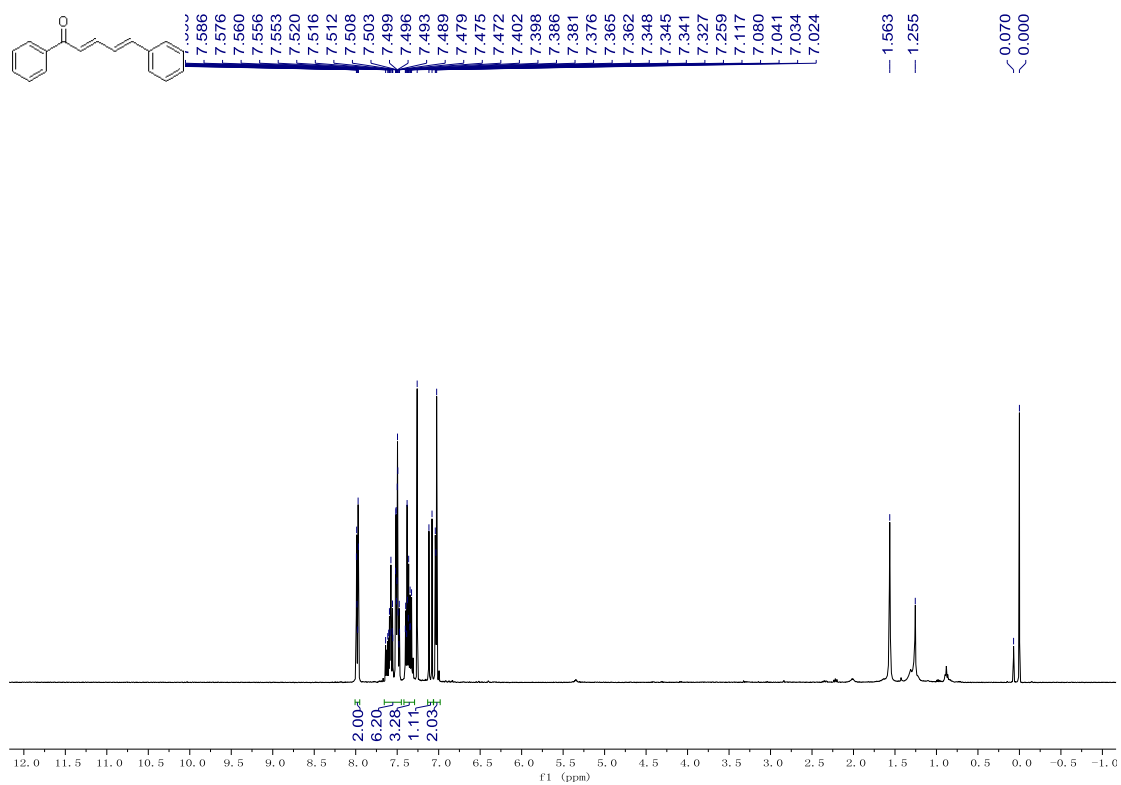

**(E)-1,5-diphenyl-3-((E)-styryl)pent-4-en-1-one (5)**

<sup>1</sup>H NMR (400 MHz, CDCl<sub>3</sub>)

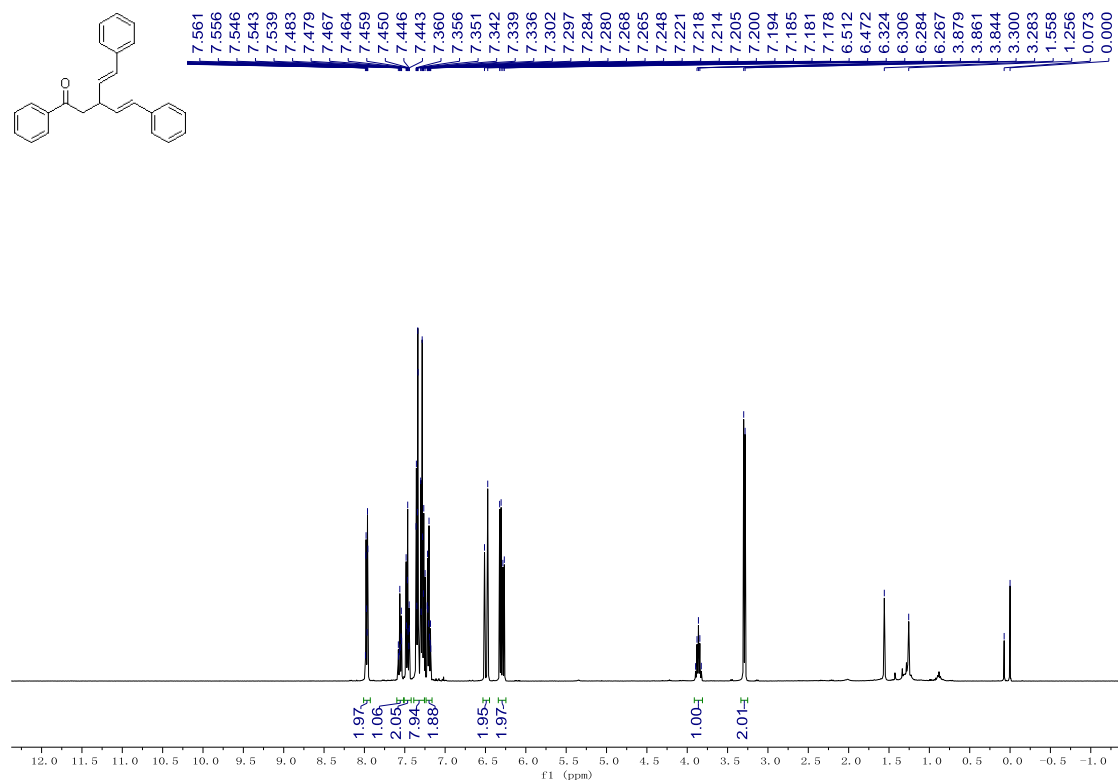

**(R,E)-2-(5-oxo-5-phenyl-1-(p-tolyl)pent-1-en-3-yl)isoindoline-1,3-dione (3ab)**

<sup>1</sup>H NMR (600 MHz, CDCl<sub>3</sub>)

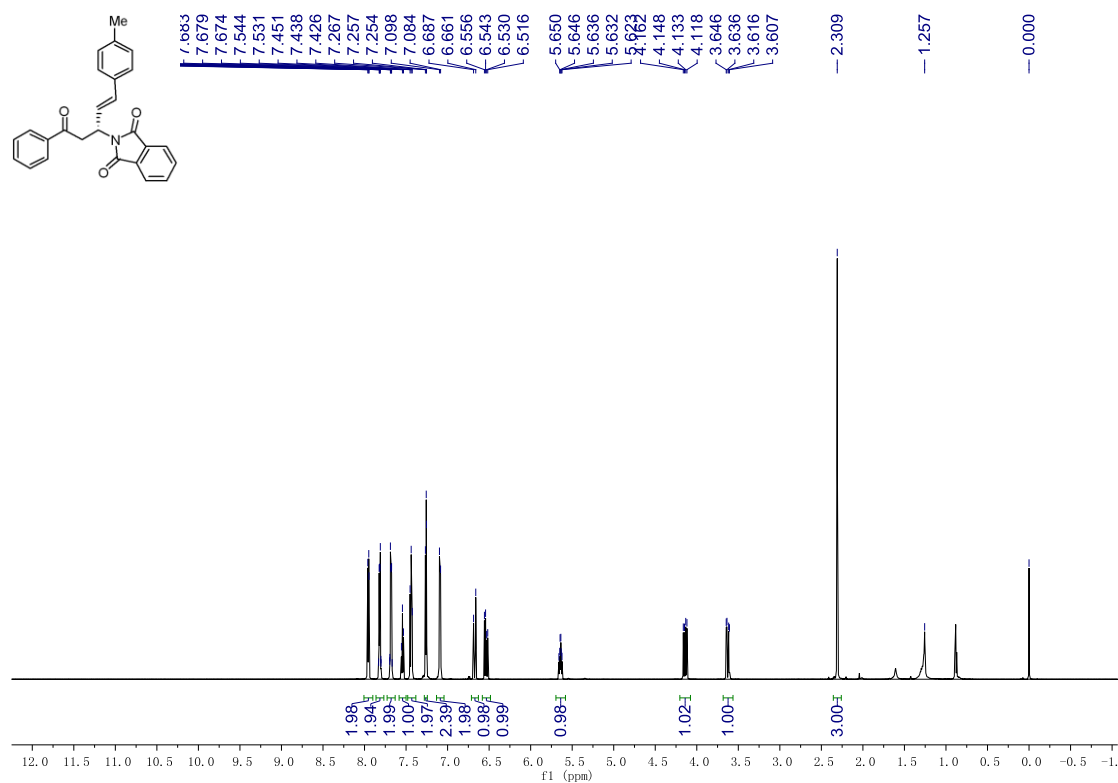

$^{13}\text{C}$   $\{^1\text{H}\}$  NMR (150 MHz,  $\text{CDCl}_3$ )

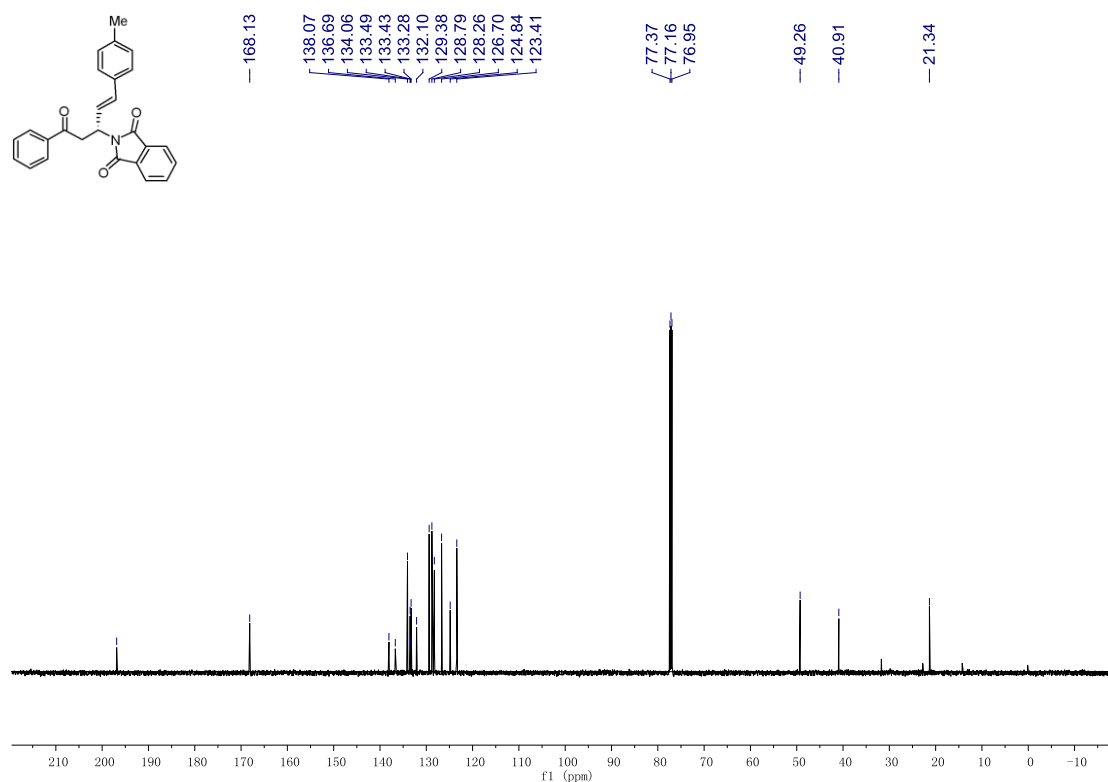

**(R,E)-2-(1-(4-methoxyphenyl)-5-oxo-5-phenylpent-1-en-3-yl)isoindoline-1,3-dione (3ac)**

$^1\text{H}$  NMR (600 MHz,  $\text{CDCl}_3$ )

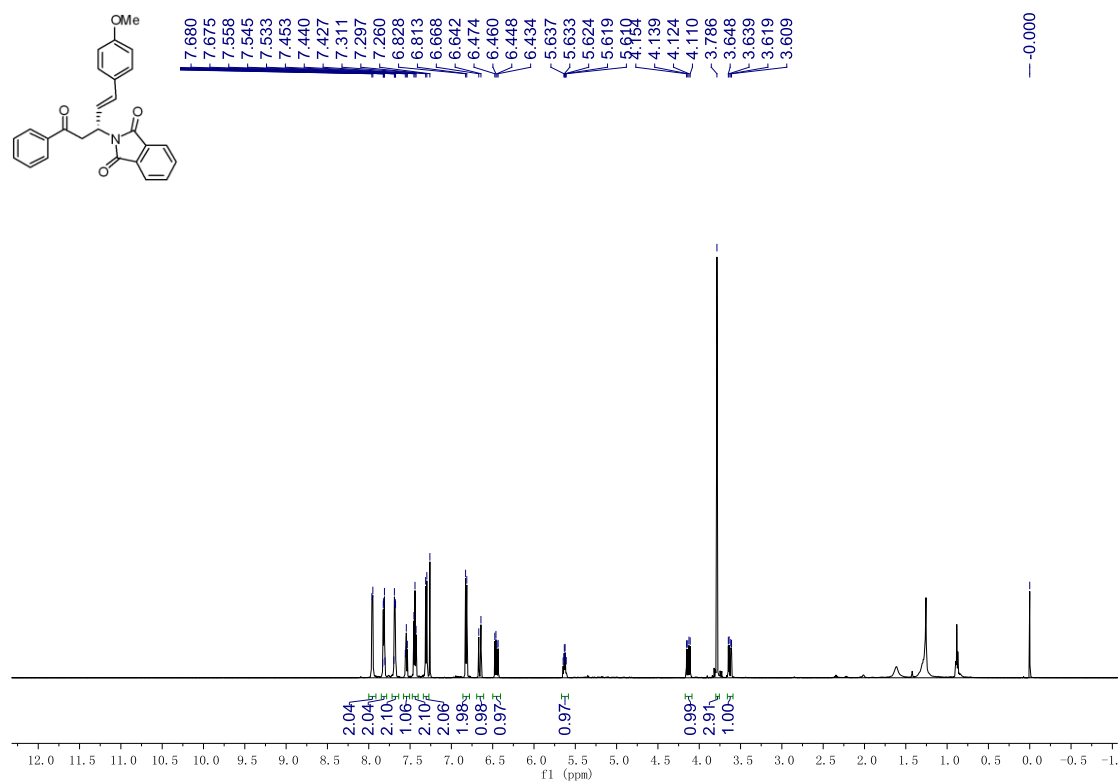

$^{13}\text{C}$  { $^1\text{H}$ } NMR (150 MHz,  $\text{CDCl}_3$ )

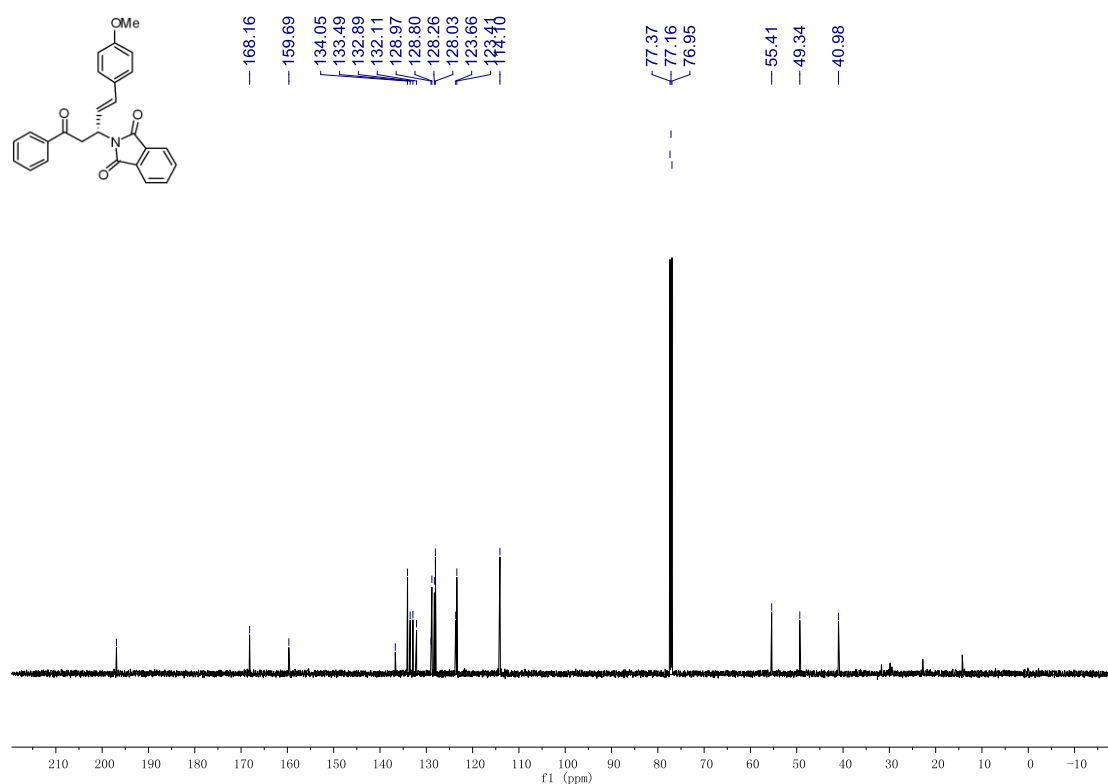

**(*R,E*)-2-(1-(3-fluorophenyl)-5-oxo-5-phenylpent-1-en-3-yl)isoindoline-1,3-dione**  
**(3ad)**

$^1\text{H}$  NMR (600 MHz,  $\text{CDCl}_3$ )

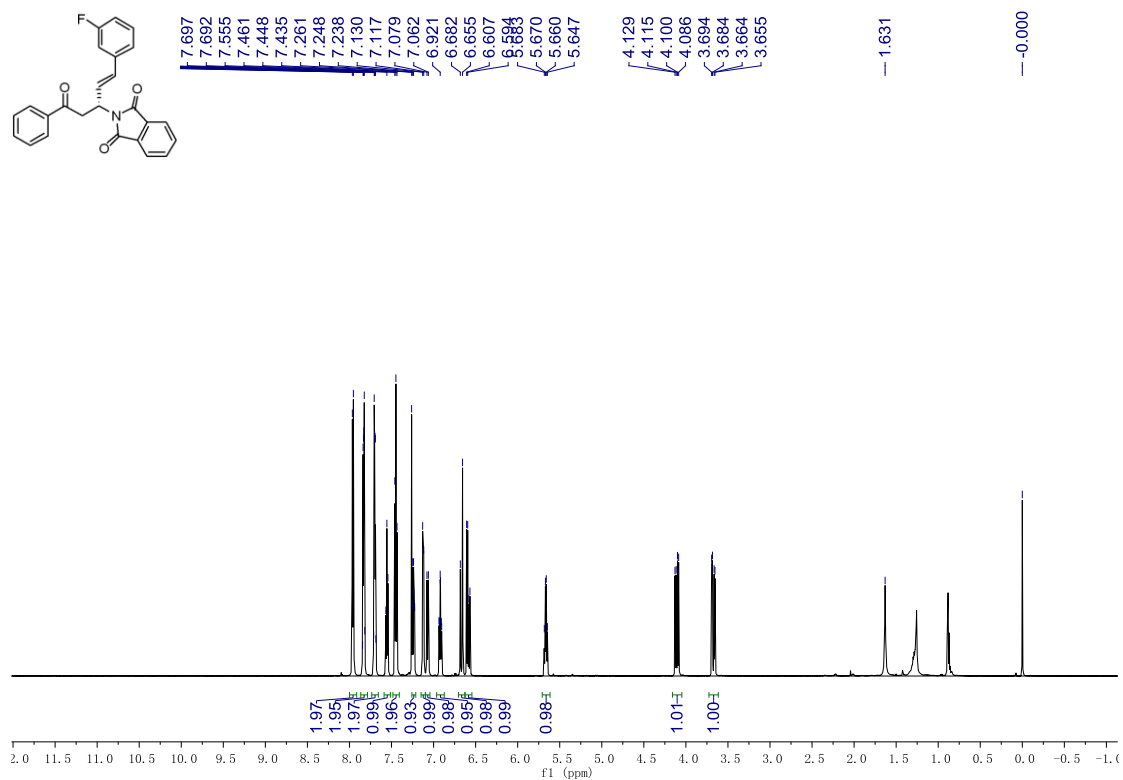



$^{13}\text{C} \{^1\text{H}\}$  NMR (150 MHz,  $\text{CDCl}_3$ )

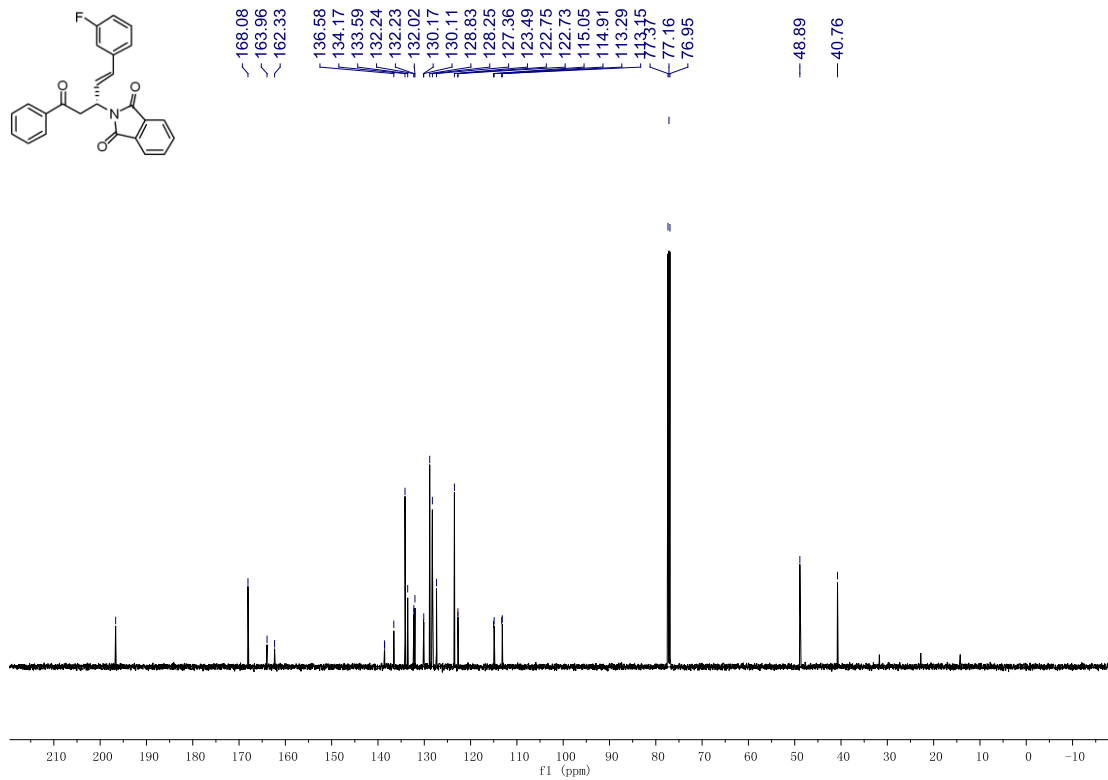

$^{19}\text{F} \{^1\text{H}\}$  NMR (564 MHz,  $\text{CDCl}_3$ )

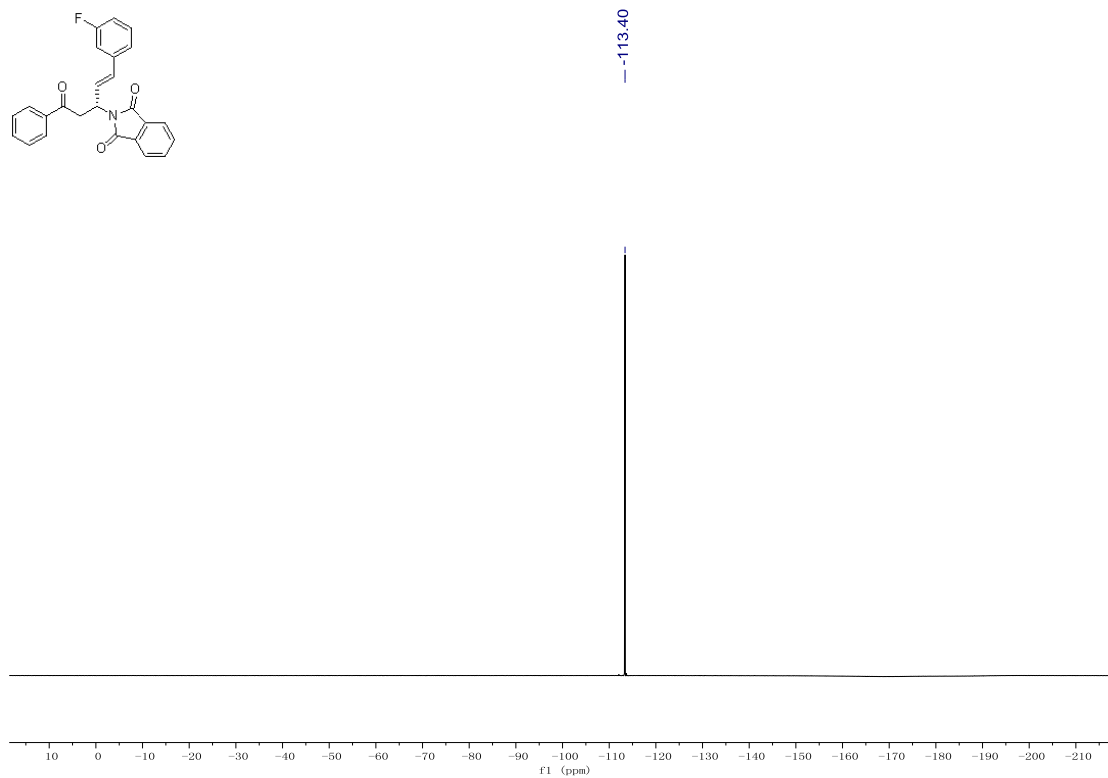

**(*R,E*)-2-(1-(4-chlorophenyl)-5-oxo-5-phenylpent-1-en-3-yl)isoindoline-1,3-dione (3ae)**

<sup>1</sup>H NMR (600 MHz, CDCl<sub>3</sub>)

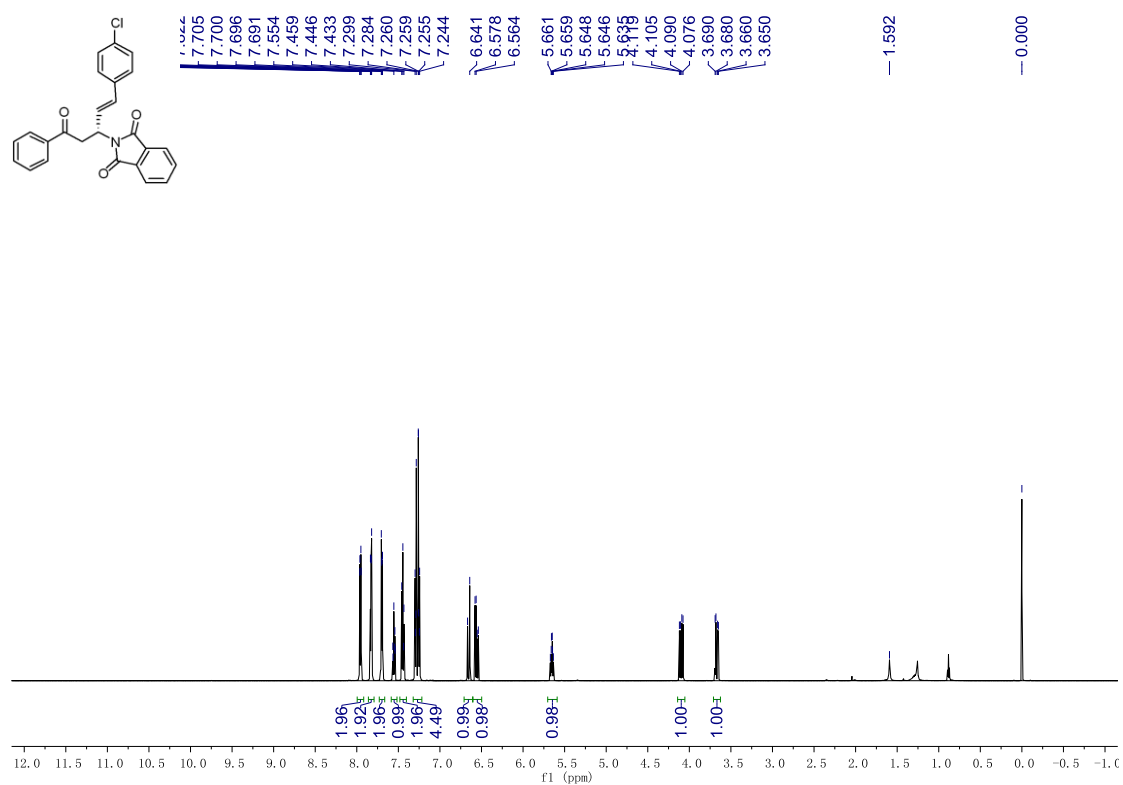

<sup>13</sup>C {<sup>1</sup>H} NMR (150 MHz, CDCl<sub>3</sub>)

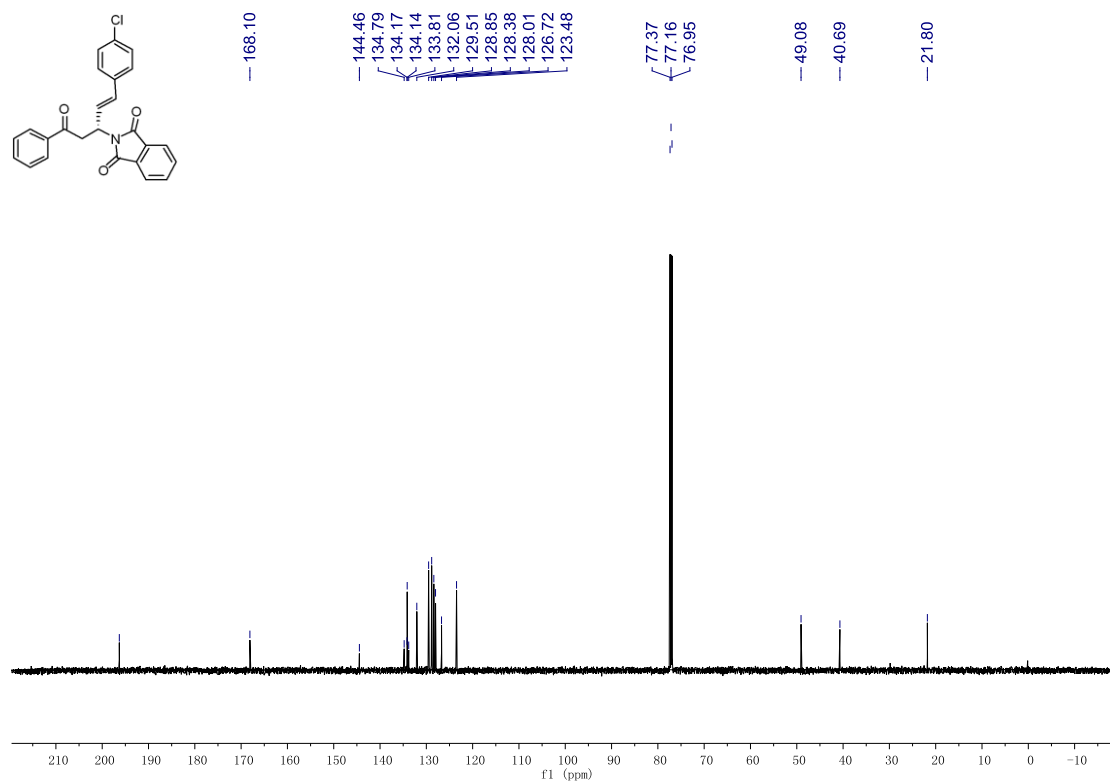

**(*R,E*)-2-(1-(4-bromophenyl)-5-oxo-5-phenylpent-1-en-3-yl)isoindoline-1,3-dione (3af)**

$^1\text{H}$  NMR (600 MHz,  $\text{CDCl}_3$ )

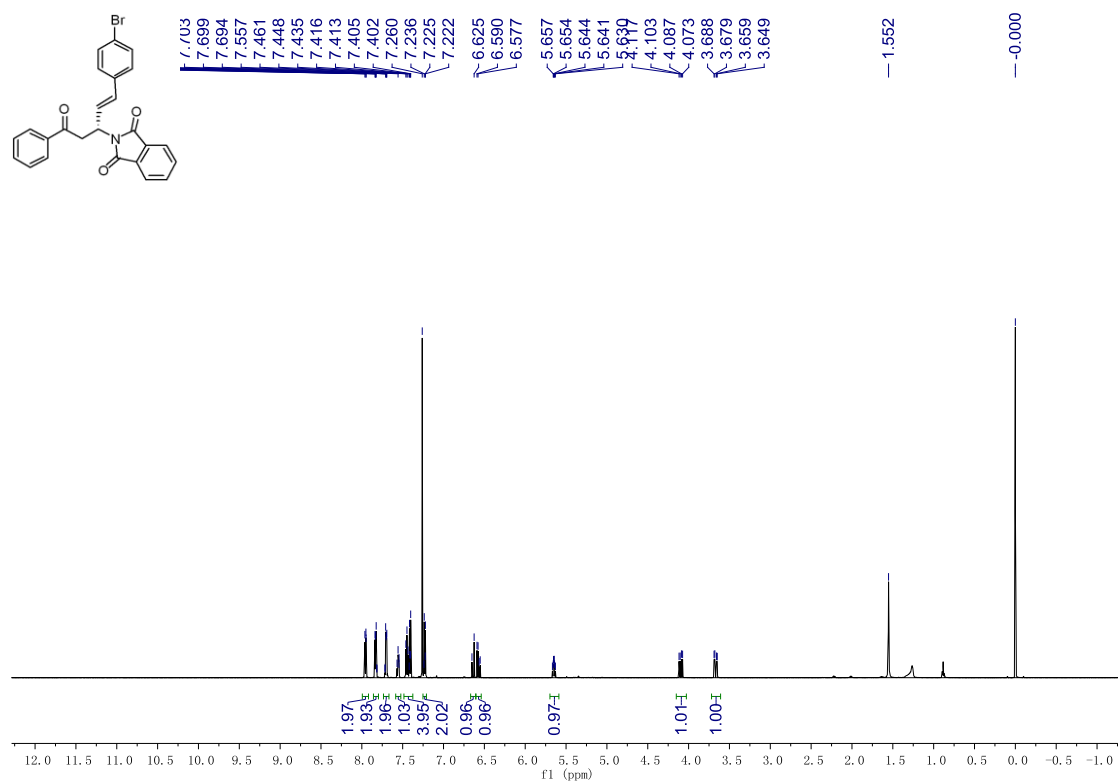

$^{13}\text{C}$  { $^1\text{H}$ } NMR (150 MHz,  $\text{CDCl}_3$ )

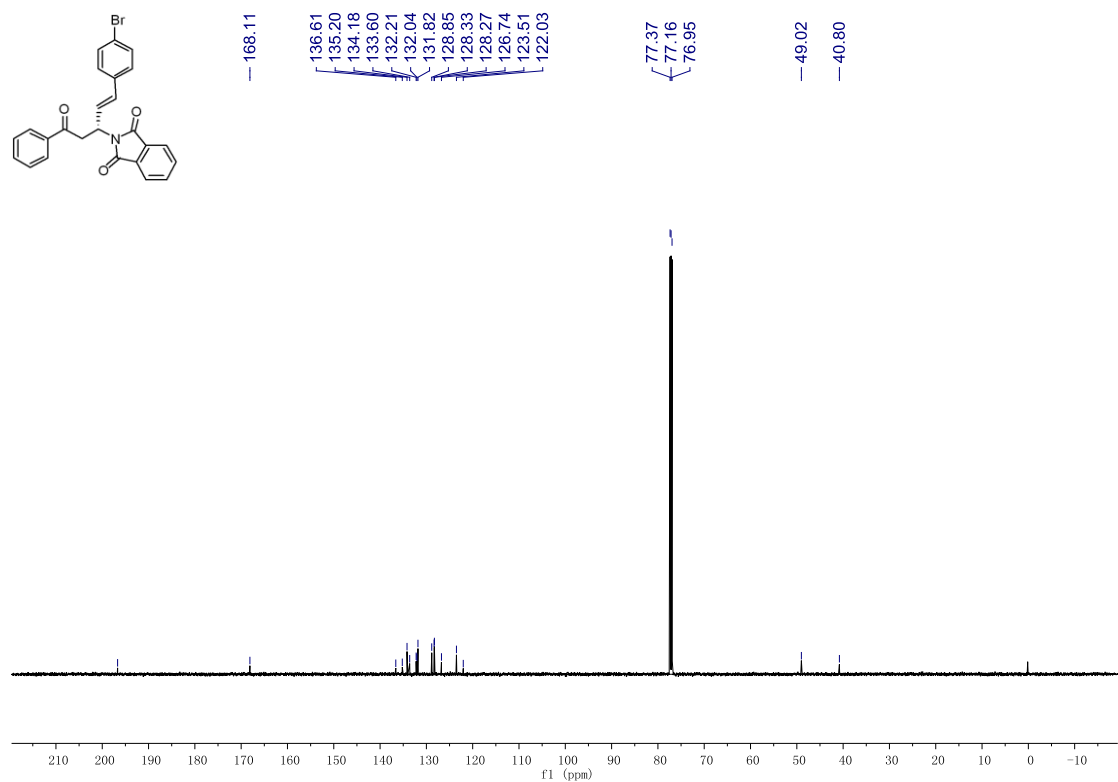

**(*R,E*)-2-(5-oxo-5-phenyl-1-(4-(trifluoromethyl)phenyl)pent-1-en-3-yl)isoindoline-1,3-dione (3ag)**

<sup>1</sup>H NMR (600 MHz, CDCl<sub>3</sub>)

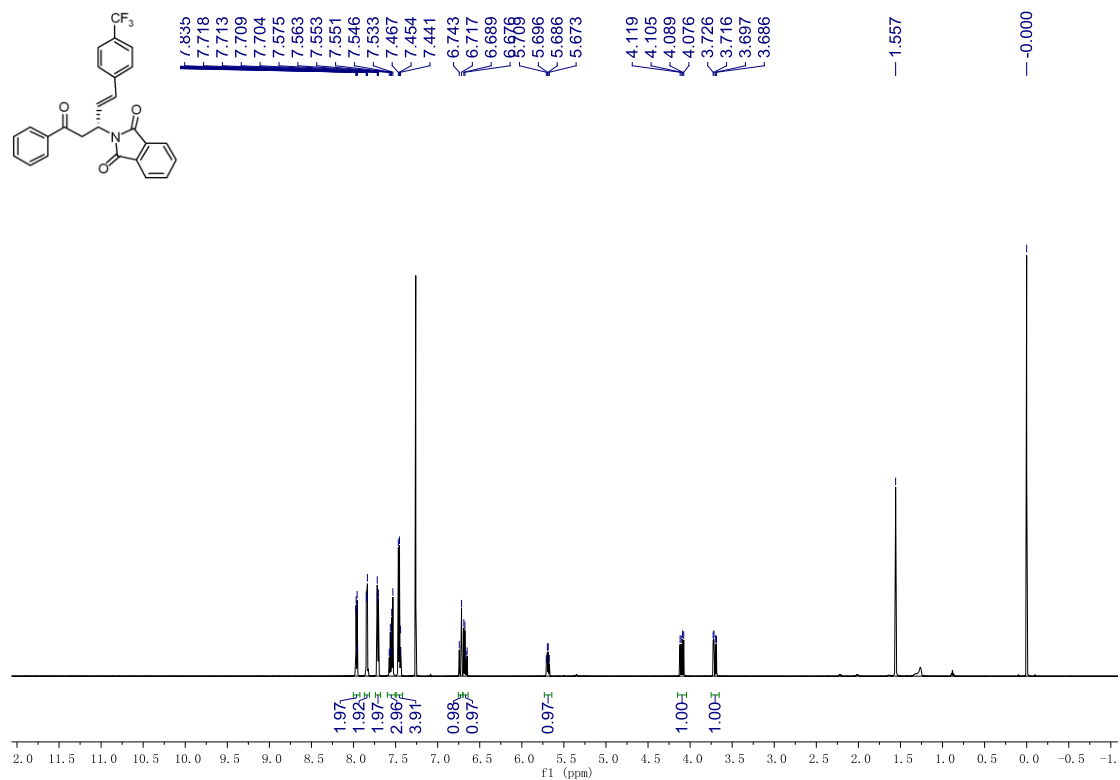

<sup>13</sup>C {<sup>1</sup>H} NMR (150 MHz, CDCl<sub>3</sub>)

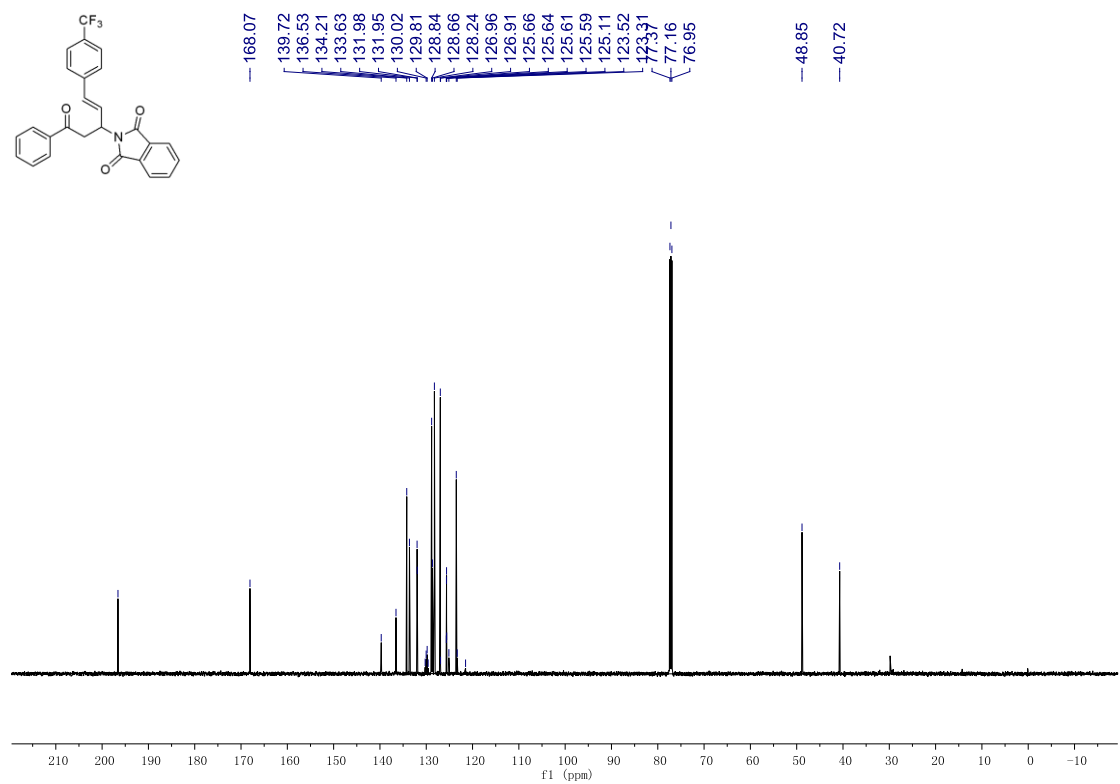

$^{19}\text{F}$   $\{^1\text{H}\}$  NMR (564 MHz,  $\text{CDCl}_3$ )

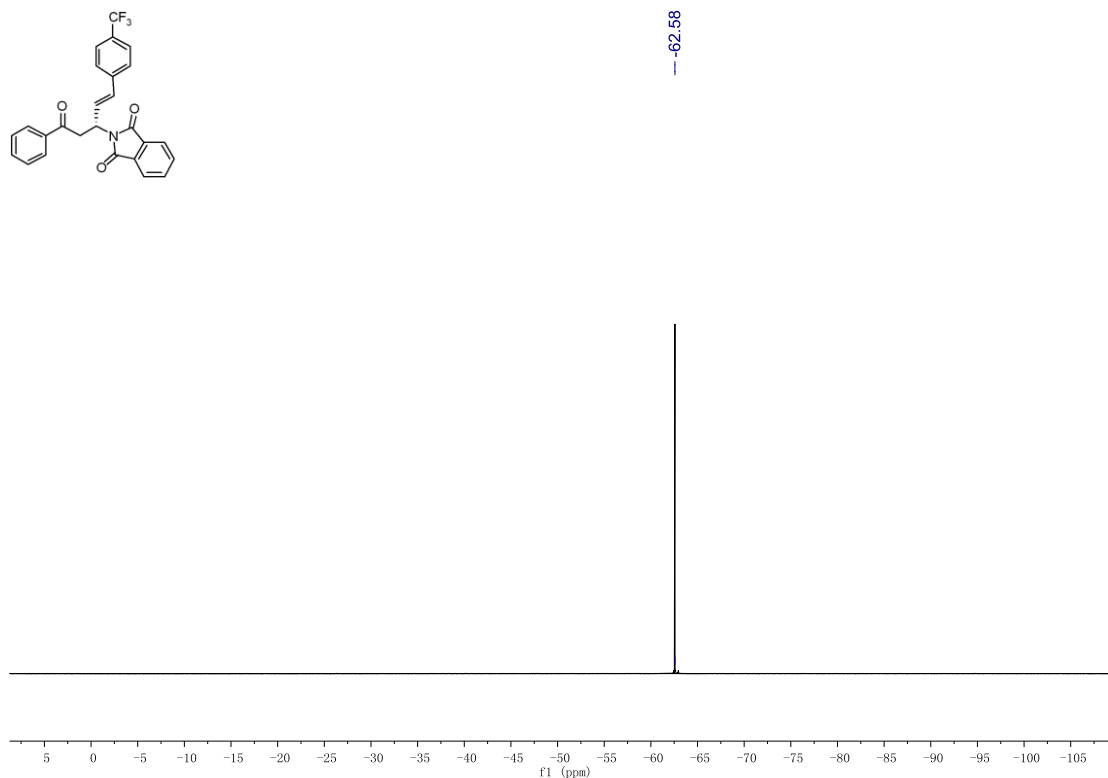

**(R)-2-(1-(furan-2-yl)-3-oxo-3-phenylpropyl)isoindoline-1,3-dione (3ah)**

$^1\text{H}$  NMR (600 MHz,  $\text{CDCl}_3$ )

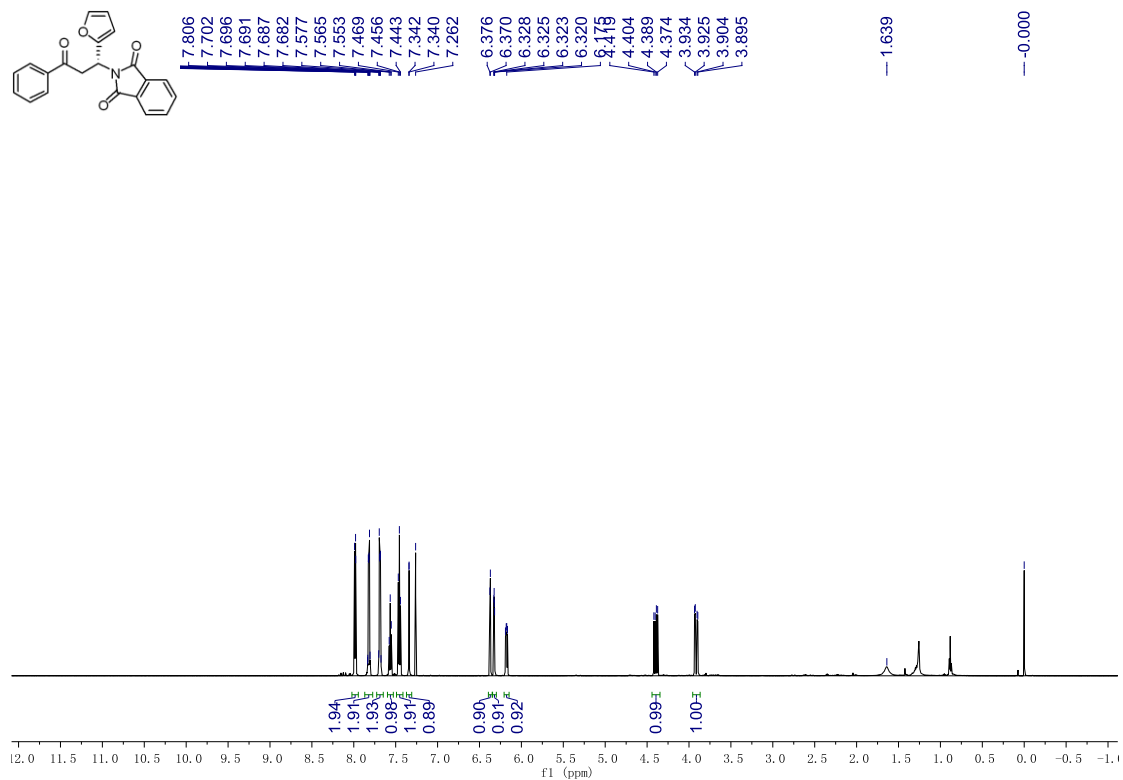

$^{13}\text{C}$  { $^1\text{H}$ } NMR (150 MHz,  $\text{CDCl}_3$ )

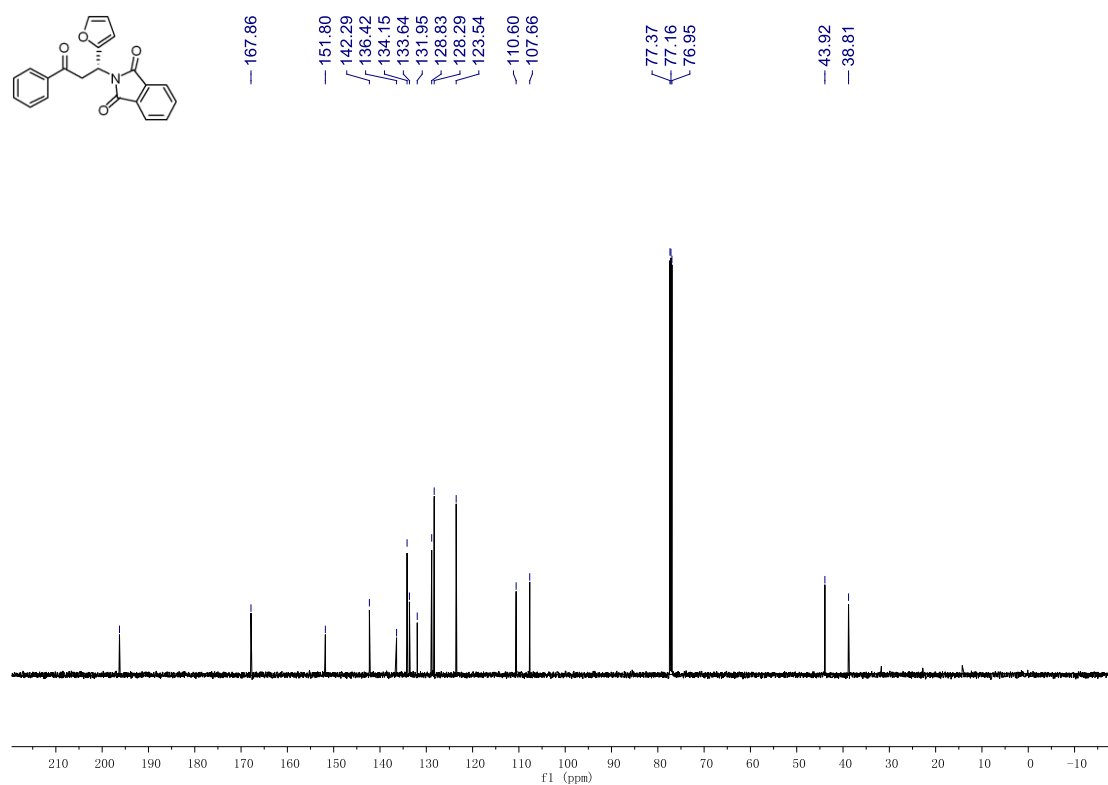

**(R)-2-(1-(benzofuran-2-yl)-3-oxo-3-phenylpropyl)isoindoline-1,3-dione (3ai)**

$^1\text{H}$  NMR (600 MHz,  $\text{CDCl}_3$ )

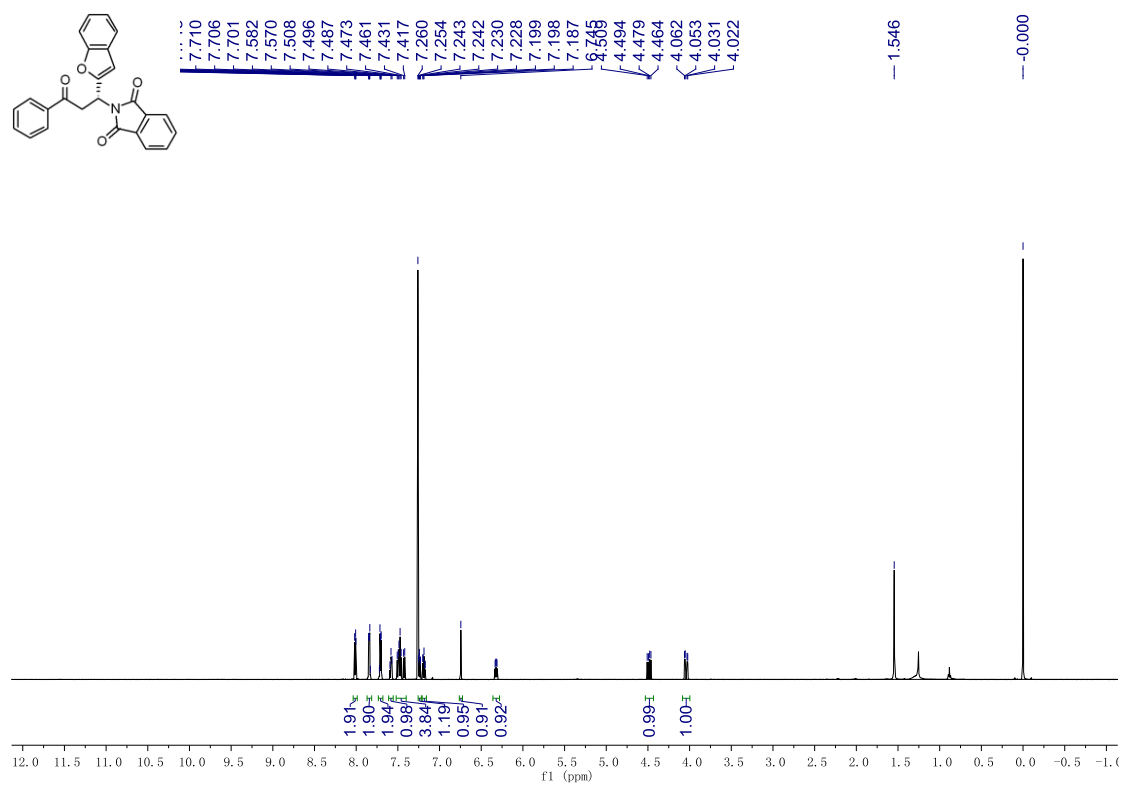

$^{13}\text{C}$   $\{^1\text{H}\}$  NMR (150 MHz,  $\text{CDCl}_3$ )

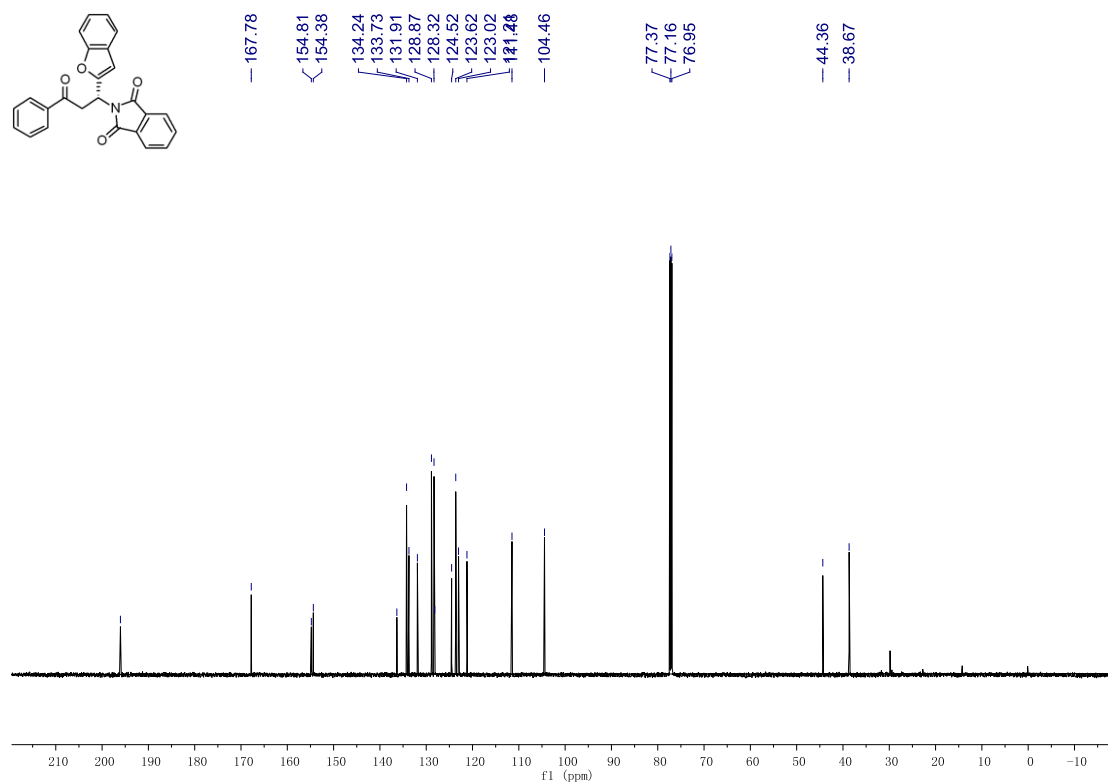

**(R)-2-(3-oxo-3-phenyl-1-(thiophen-2-yl)propyl)isoindoline-1,3-dione (3aj)**

$^1\text{H}$  NMR (600 MHz,  $\text{CDCl}_3$ )

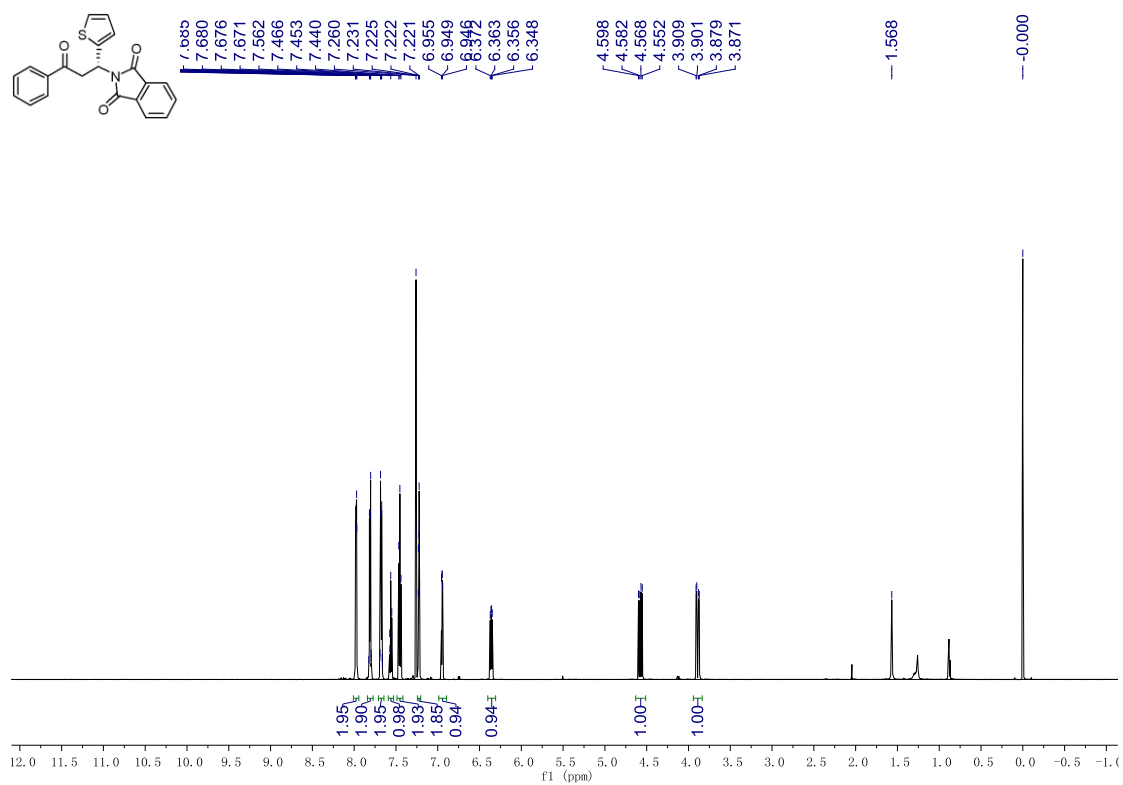

$^{13}\text{C}$  { $^1\text{H}$ } NMR (150 MHz,  $\text{CDCl}_3$ )

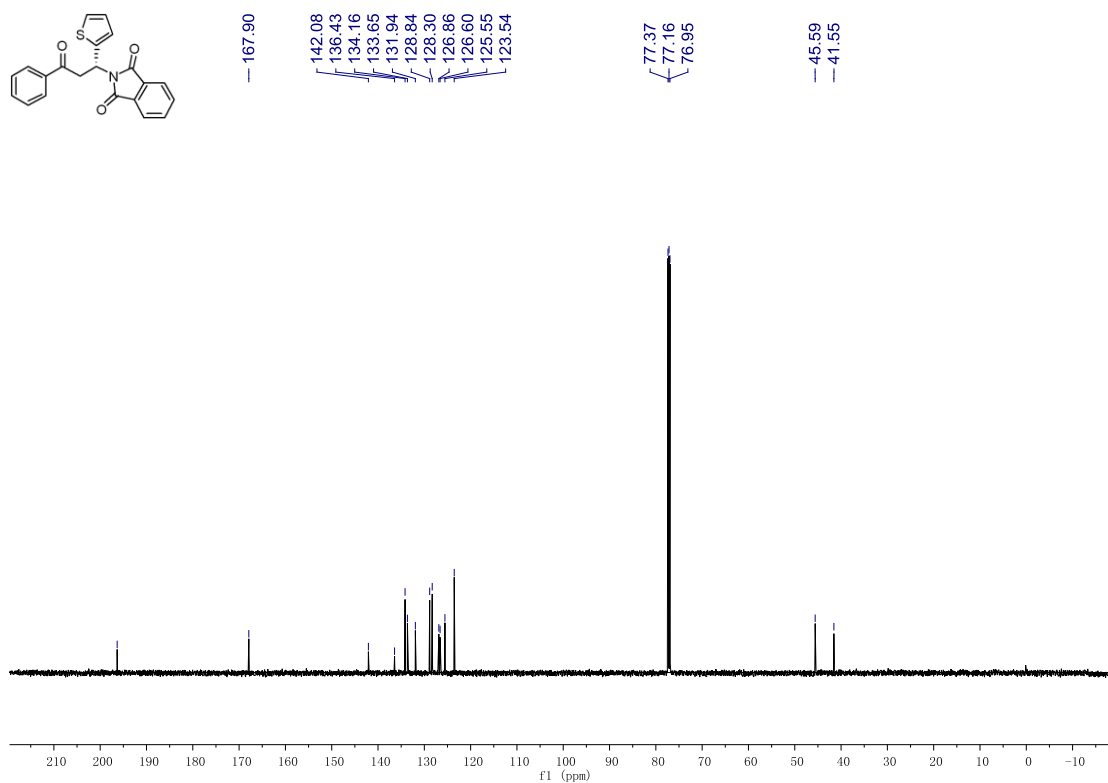

**(R)-2-(1-(benzo[*b*]thiophen-2-yl)-3-oxo-3-phenylpropyl)isoindoline-1,3-dione (3ak)**

$^1\text{H}$  NMR (400 MHz,  $\text{CDCl}_3$ )

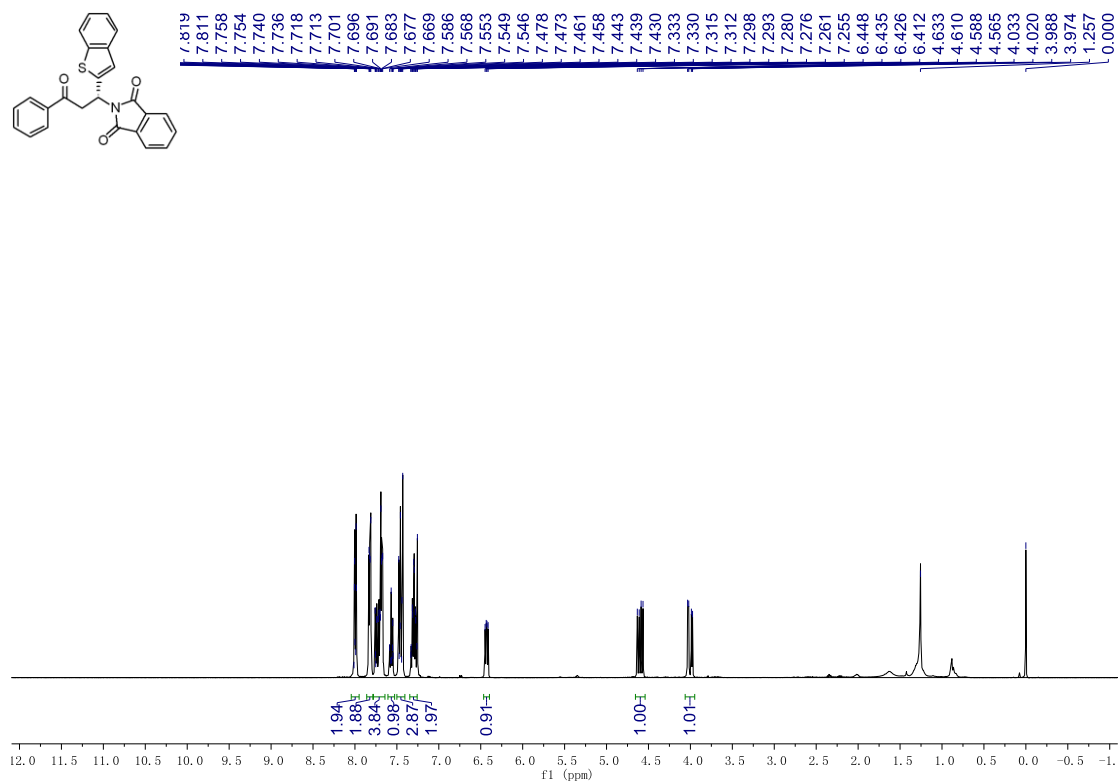



$^{13}\text{C}$  { $^1\text{H}$ } NMR (150 MHz,  $\text{CDCl}_3$ )

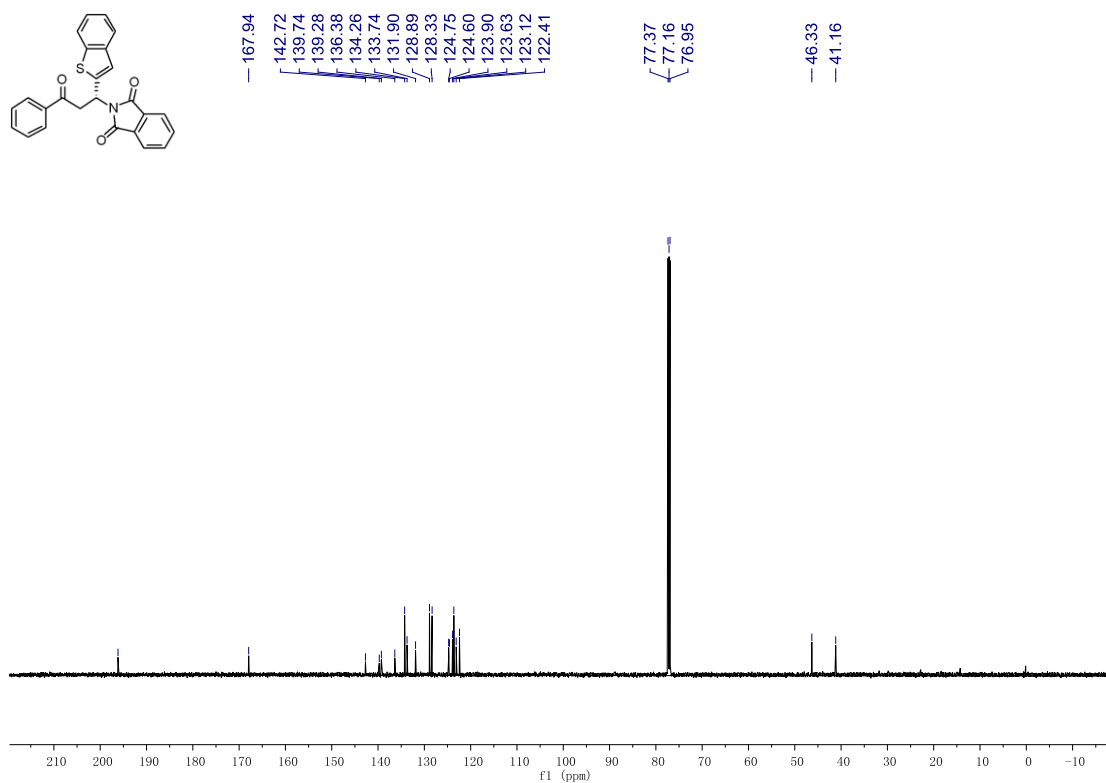

**(R,E)-2-(1-oxo-1-phenylundec-4-en-3-yl)isoindoline-1,3-dione (3a)**

$^1\text{H}$  NMR (600 MHz,  $\text{CDCl}_3$ )

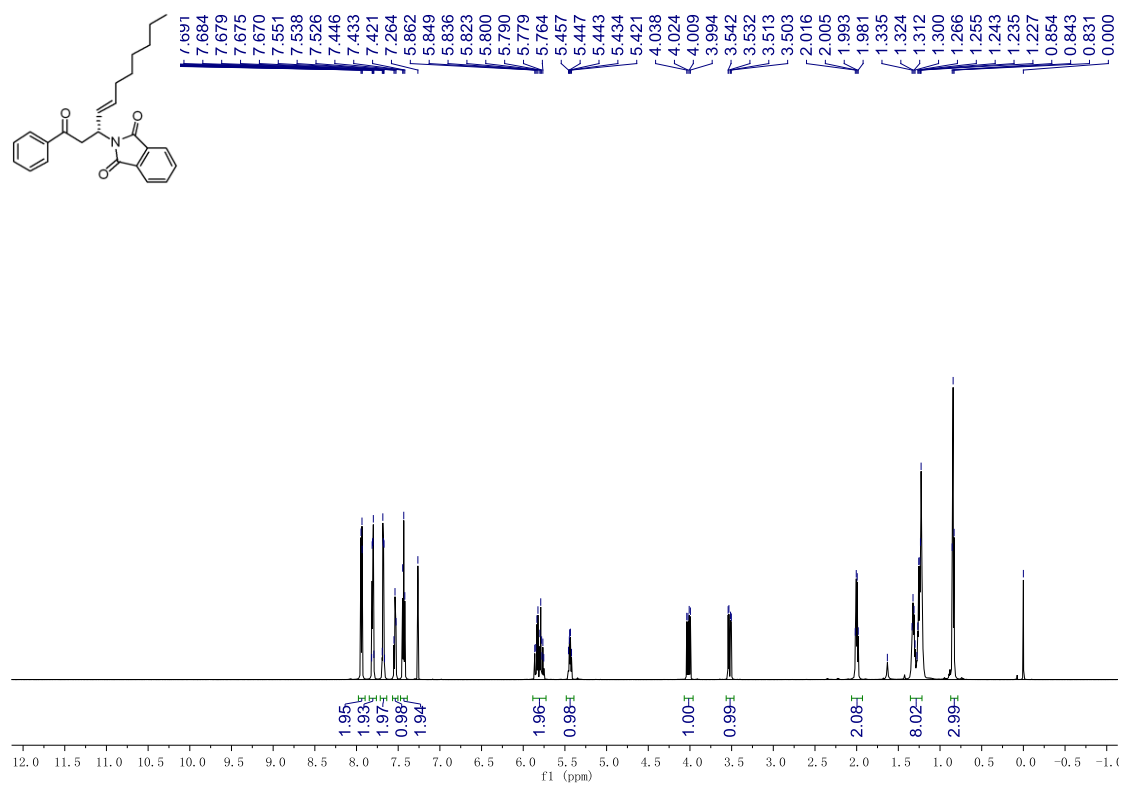

$^{13}\text{C}$  { $^1\text{H}$ } NMR (150 MHz,  $\text{CDCl}_3$ )

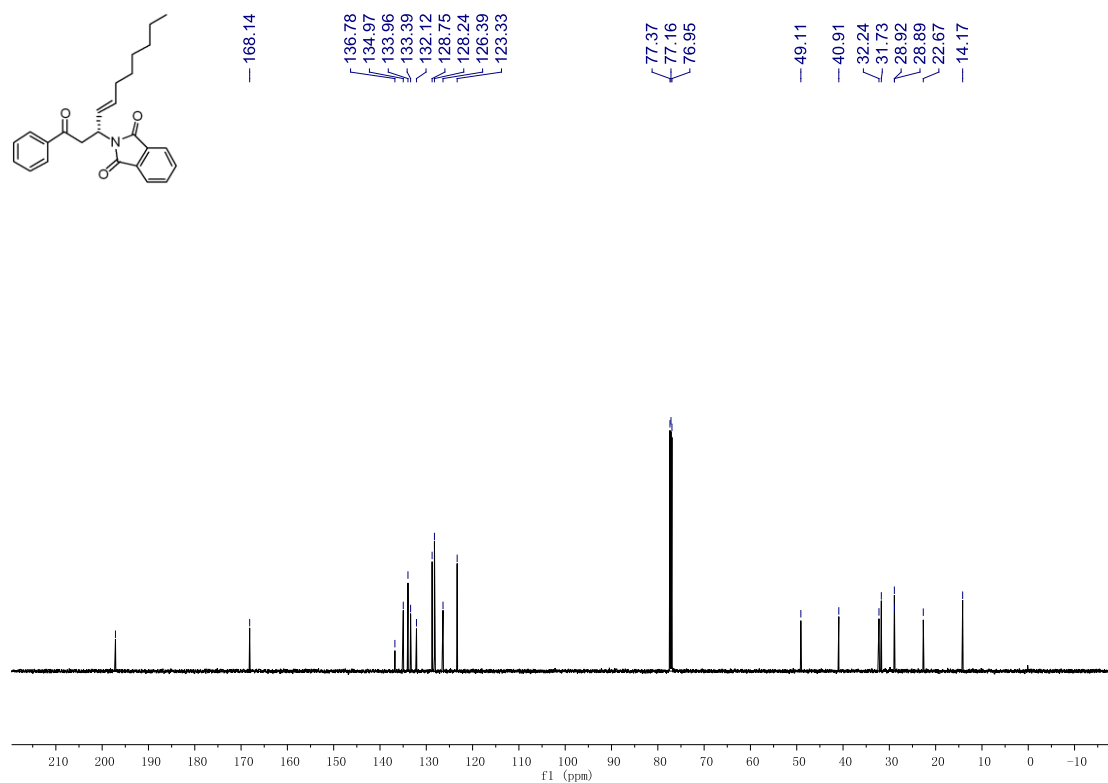

**(R)-2-(5-methyl-1-oxo-1-phenylhex-4-en-3-yl)isoindoline-1,3-dione (3am)**

$^1\text{H}$  NMR (600 MHz,  $\text{CDCl}_3$ )

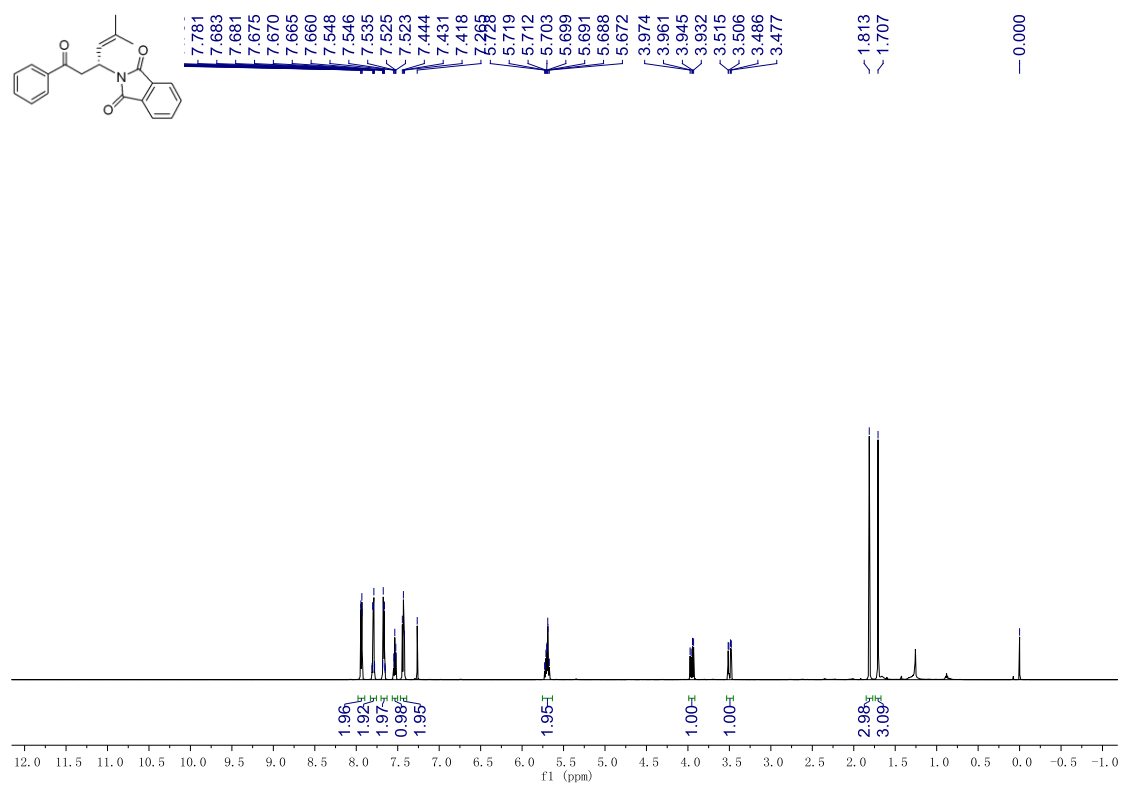

$^{13}\text{C}$  { $^1\text{H}$ } NMR (150 MHz,  $\text{CDCl}_3$ )

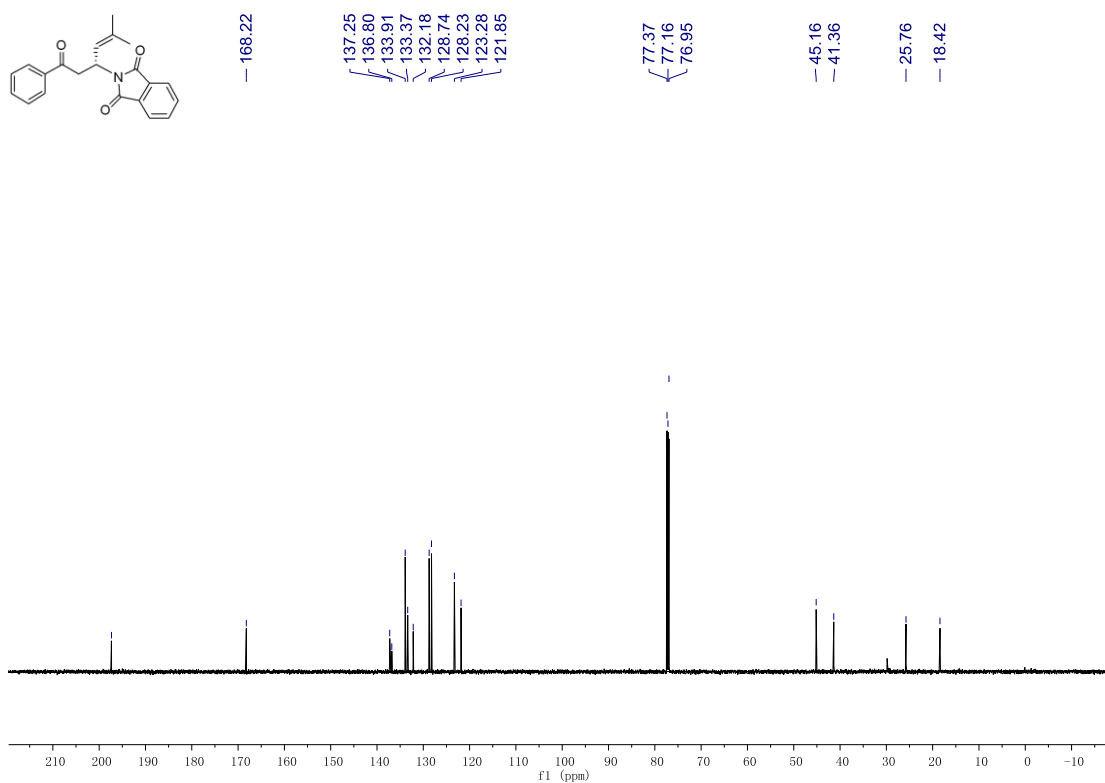

**2-((3R,E)-5-(4-bromophenyl)-5-hydroxy-1-phenylpent-1-en-3-yl)isoindoline-1,3-dione (4+4') (9:1 dr)**

$^1\text{H}$  NMR (400 MHz,  $\text{CDCl}_3$ )

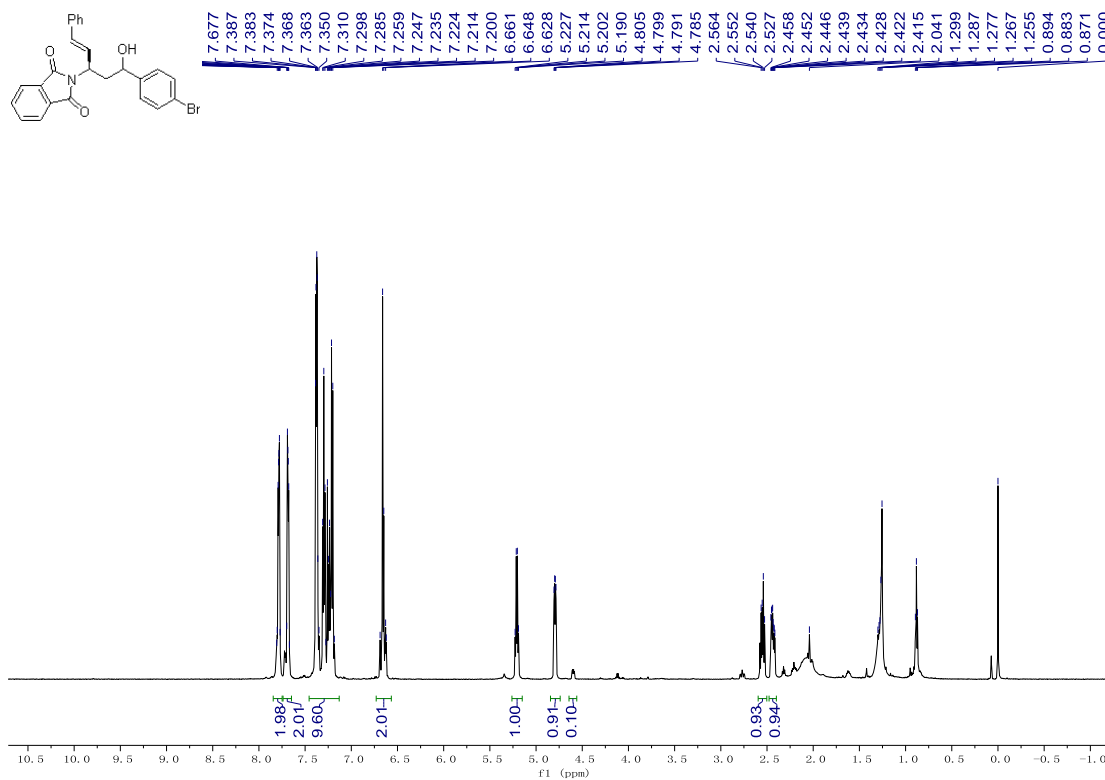

$^{13}\text{C}$  { $^1\text{H}$ } NMR (100 MHz,  $\text{CDCl}_3$ )

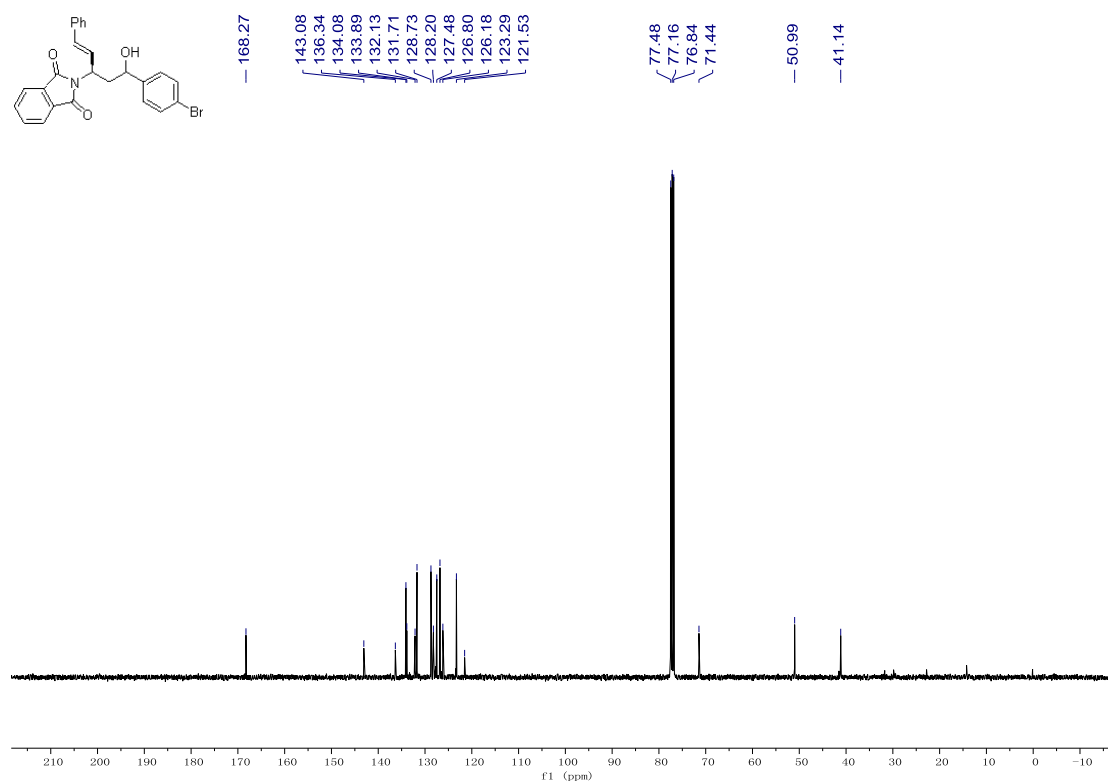

**2-((3R,E)-5-(4-bromophenyl)-5-hydroxy-1-phenylpent-1-en-3-yl)isoindoline-1,3-dione (4+4') (4:1 *dr*)**

$^1\text{H}$  NMR (400 MHz,  $\text{CDCl}_3$ )

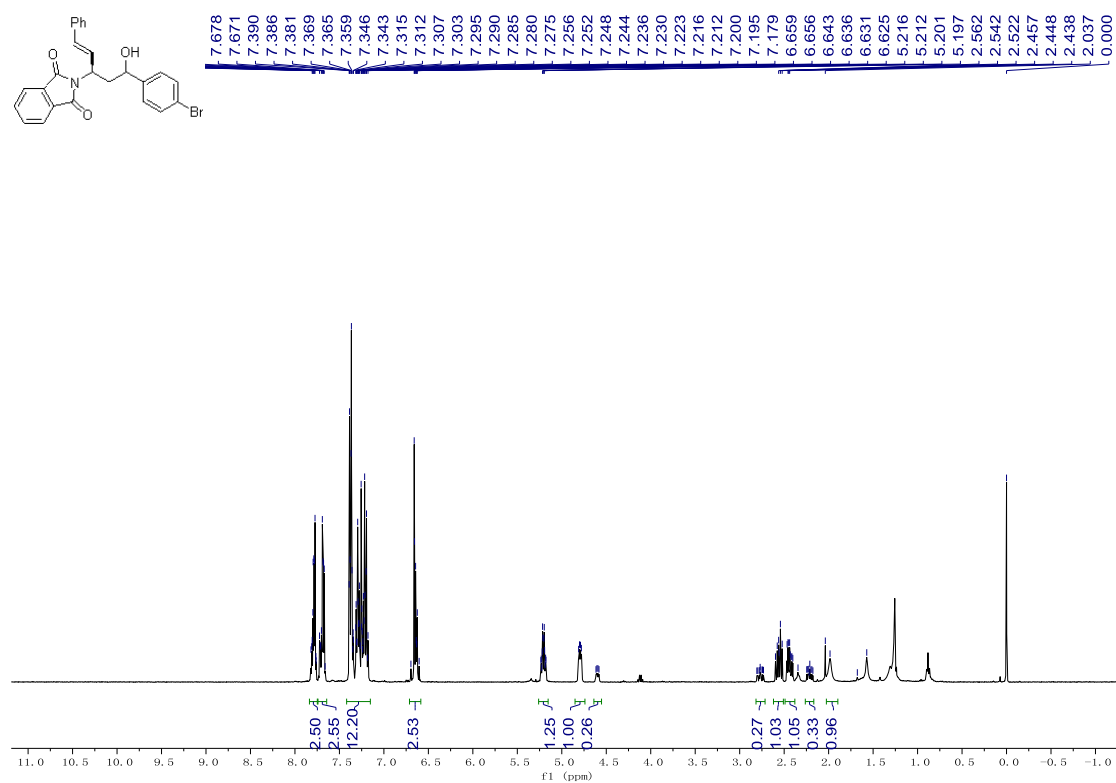

$^{13}\text{C}$   $\{^1\text{H}\}$  NMR (100 MHz,  $\text{CDCl}_3$ )

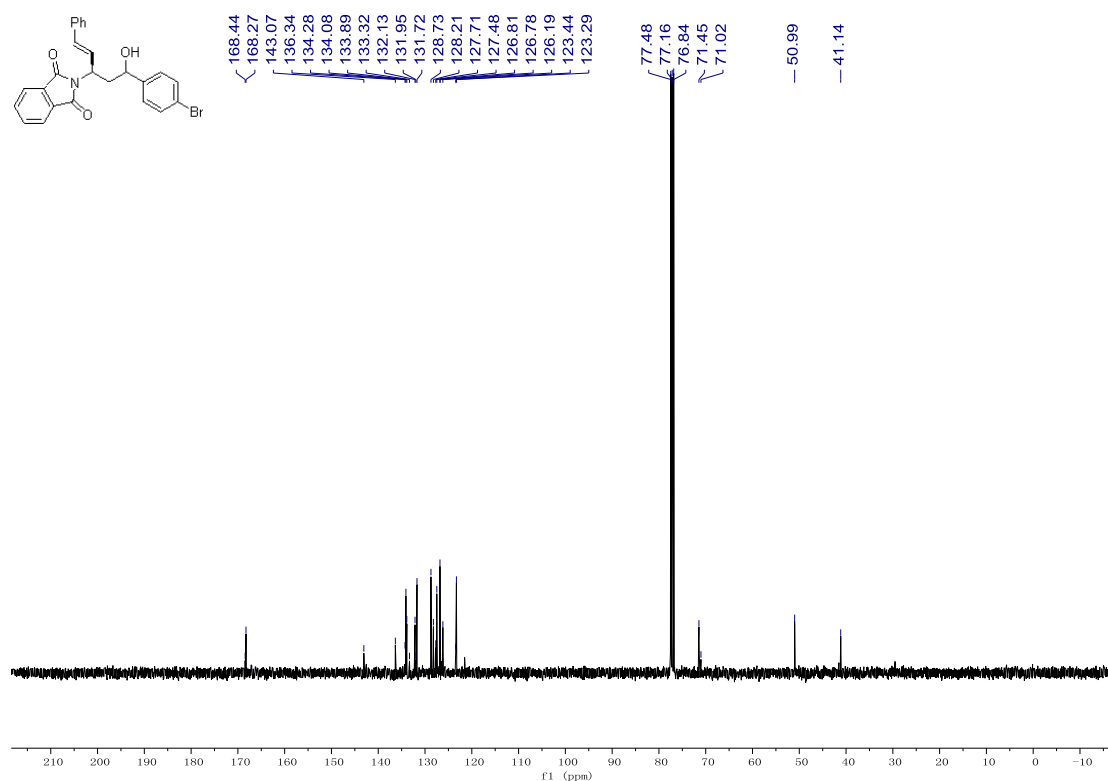

**2-((3R,E)-5-(4-bromophenyl)-5-hydroxy-1-phenylpent-1-en-3-yl)-3-hydroxyisoindolin-1-one (by-product)**

$^1\text{H}$  NMR (400 MHz,  $\text{CDCl}_3$ )

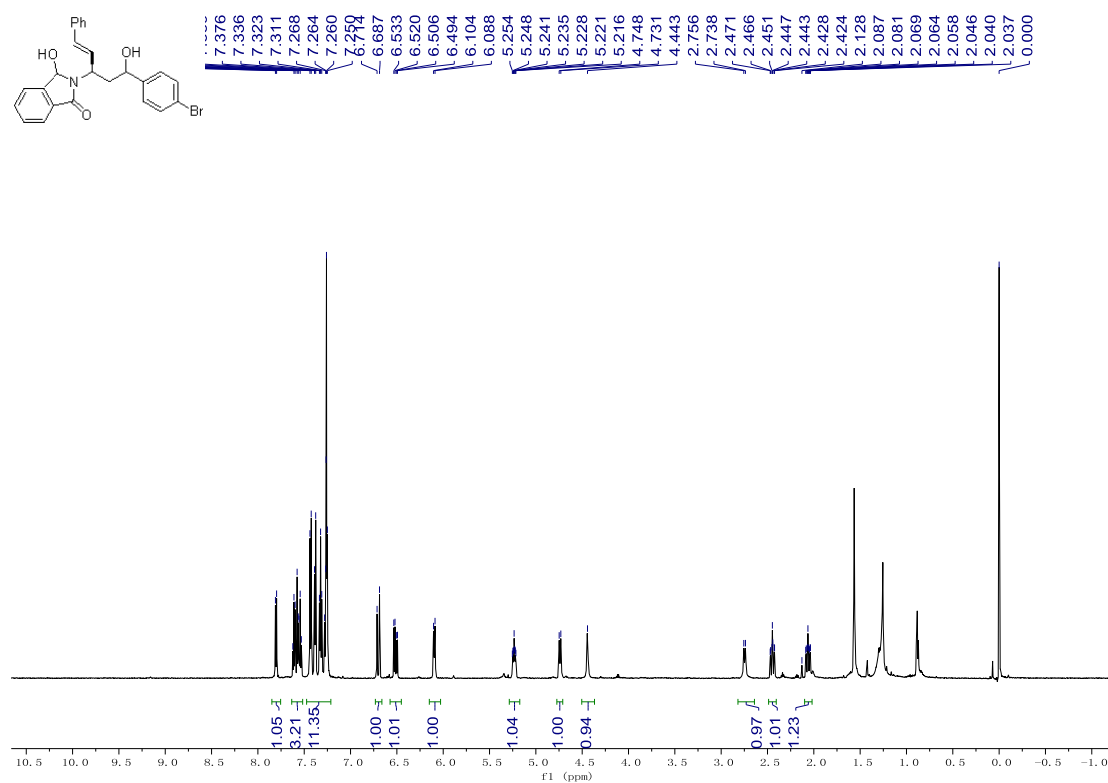

<sup>13</sup>C {<sup>1</sup>H} NMR (100 MHz, CDCl<sub>3</sub>)

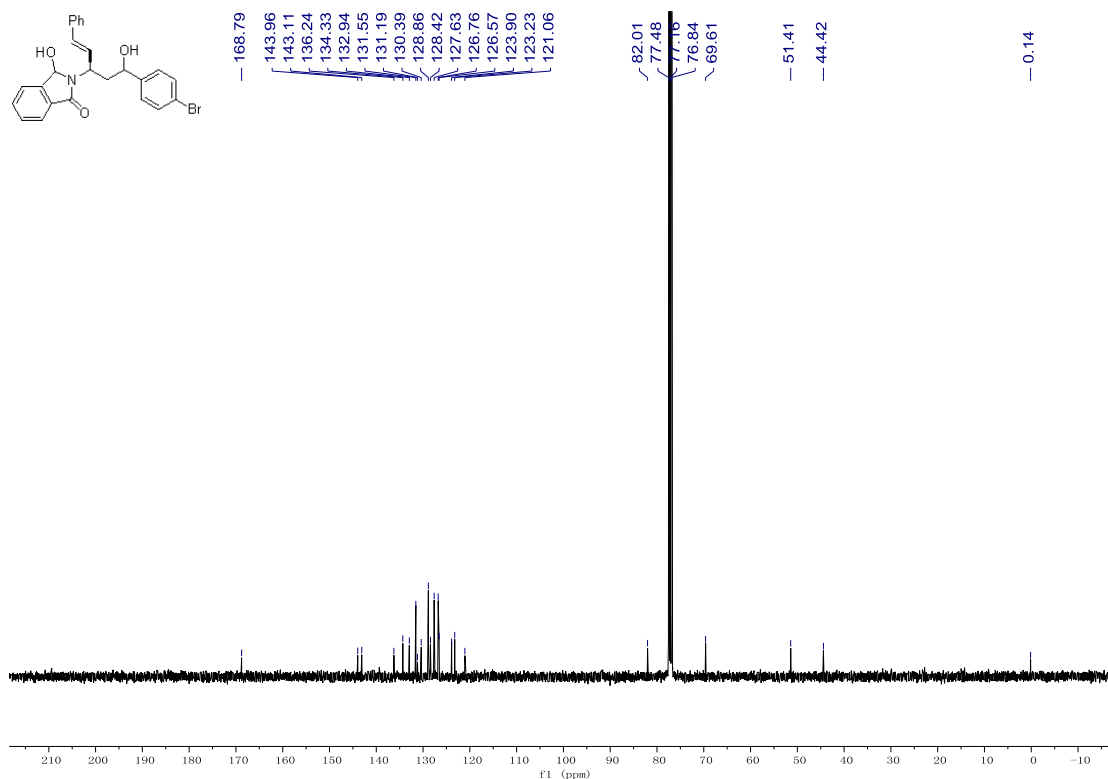

HR-MS (ESI)

Mass Spectrum SmartFormula Report

|                                                        |                          |                                   |                           |
|--------------------------------------------------------|--------------------------|-----------------------------------|---------------------------|
| Analysis Info                                          |                          | Acquisition D 2022-02-24 20:28:30 |                           |
| Analysis Name C:\Users\cgl\Desktop\0221_GE4_01_11620.d |                          |                                   |                           |
| Method                                                 | LC_NO UV_P50-1500_6MIN.m | Operator                          | Demo User                 |
| Sample Name                                            | 0221                     | Instrument                        | compact 8255754.2017<br>6 |
| Comment                                                |                          |                                   |                           |

|                     |            |                  |           |
|---------------------|------------|------------------|-----------|
| Acquisition Paramet |            |                  |           |
| Source Type         | ESI        | Ion Polarity     | Positive  |
| Focus               | Not active | Set Capillary    | 4000 V    |
| Scan Begin          | 50 m/z     | Set End Plate    | -500 V    |
| Scan End            | 1500 m/z   | Set Charging     | 2000 V    |
|                     |            | Set Corona       | 0 nA      |
|                     |            | Set Nebulizer    | 3.0 Bar   |
|                     |            | Set Dry Heater   | 200 °C    |
|                     |            | Set Dry Gas      | 8.0 l/min |
|                     |            | Set Divert Valve | Waste     |
|                     |            | Set APCI Heater  | 0 °C      |

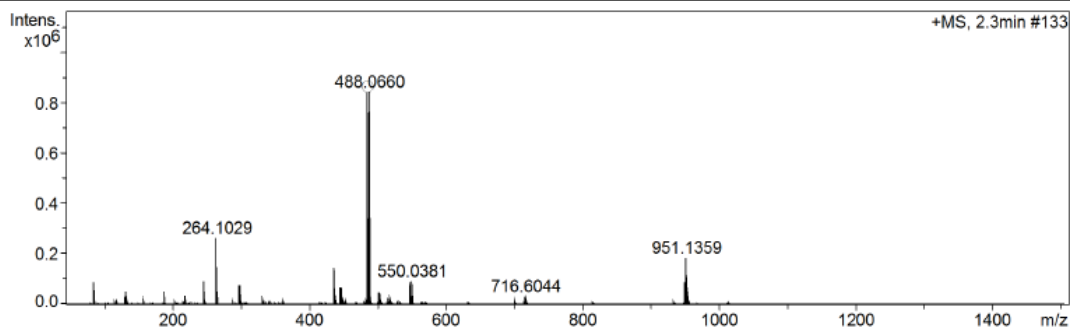

| Meas. m/z | # | Ion Formula                                         | m/z err [ppm] | mSigma | #   | mSigma | Score  | rdb  | e    | W | Conf | N-Rule |
|-----------|---|-----------------------------------------------------|---------------|--------|-----|--------|--------|------|------|---|------|--------|
| 486.0674  | 1 | C <sub>25</sub> H <sub>22</sub> BrNNaO <sub>3</sub> | 486.0675      | 0.2    | 9.5 | 1      | 100.00 | 15.0 | even |   |      | ok     |

# (1S,3R,E)-3-amino-1-(4-bromophenyl)-5-phenylpent-4-en-1-ol (5: major)

<sup>1</sup>H NMR (400 MHz, CDCl<sub>3</sub>)

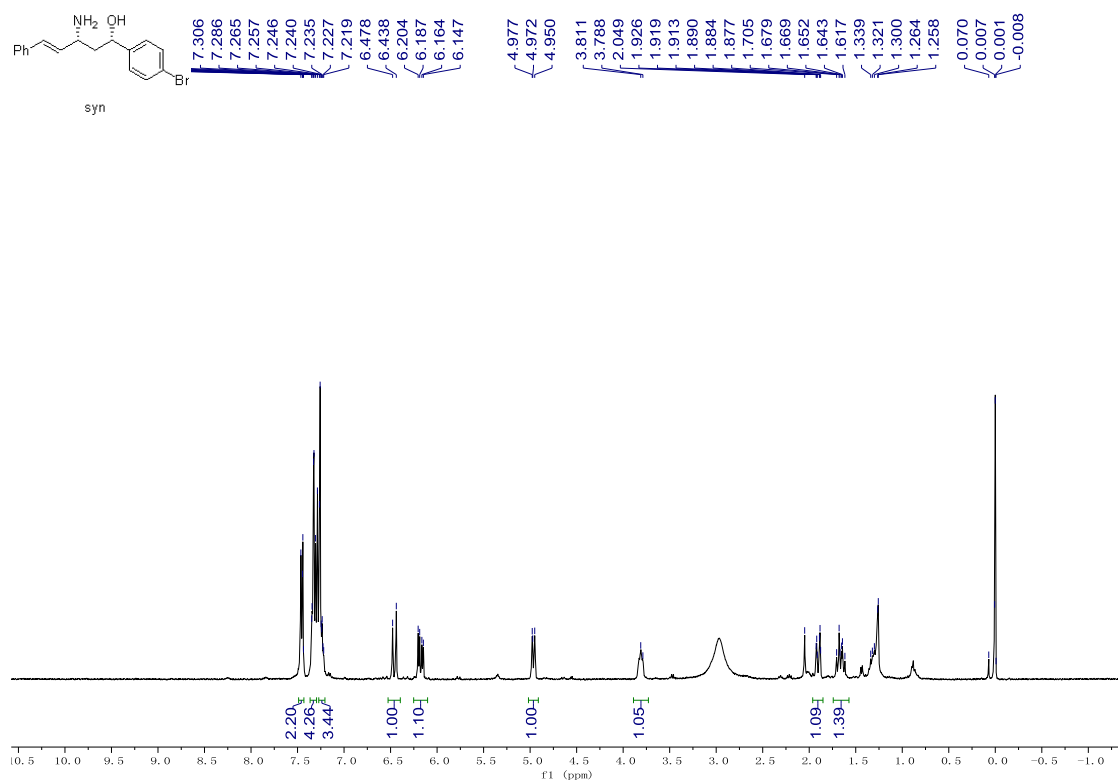

## H-H NOESY

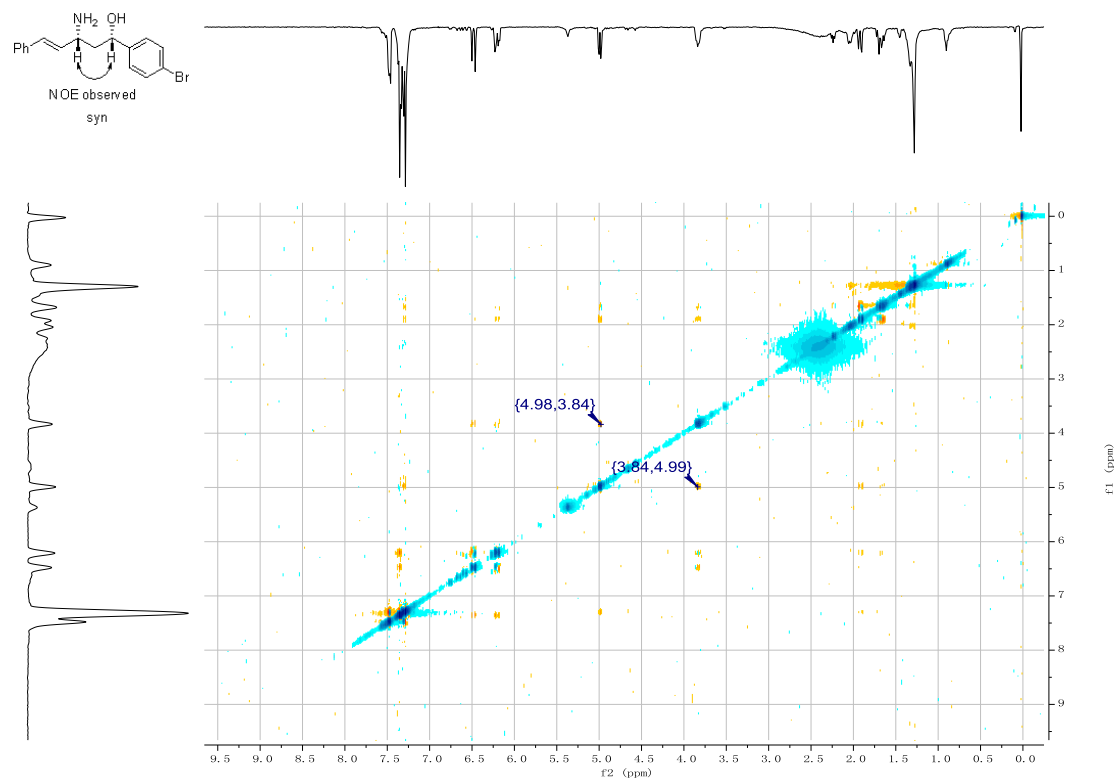

$^{13}\text{C} \{^1\text{H}\}$  NMR (150 MHz,  $\text{CDCl}_3$ )

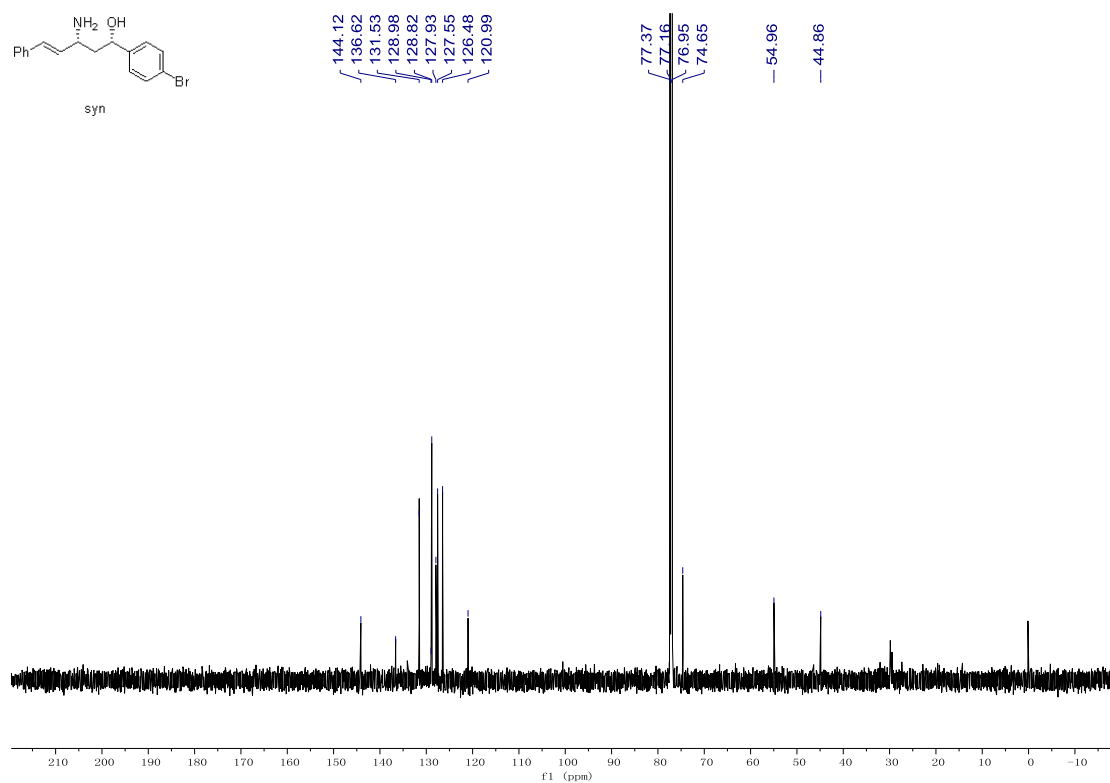

**(4R,6S)-6-(4-bromophenyl)-4-((E)-styryl)-1,3-oxazin-2-one (6)**

$^1\text{H}$  NMR (400 MHz,  $\text{CDCl}_3$ )

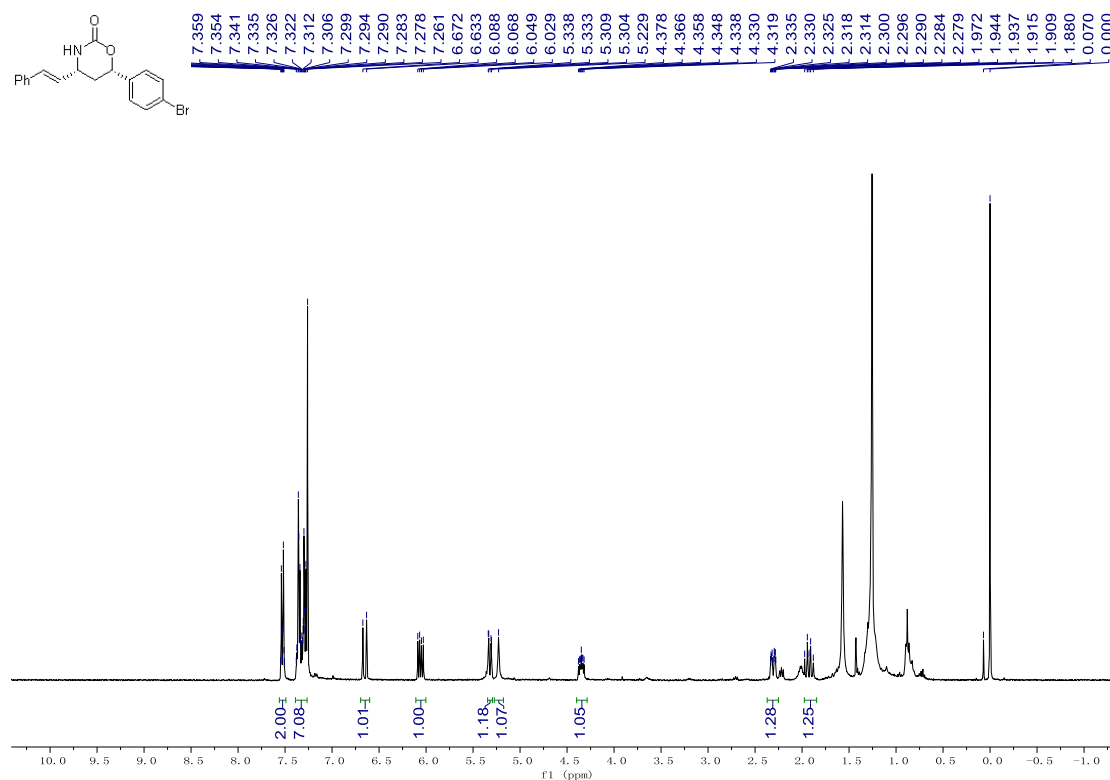



# H-H NOESY

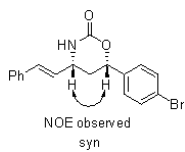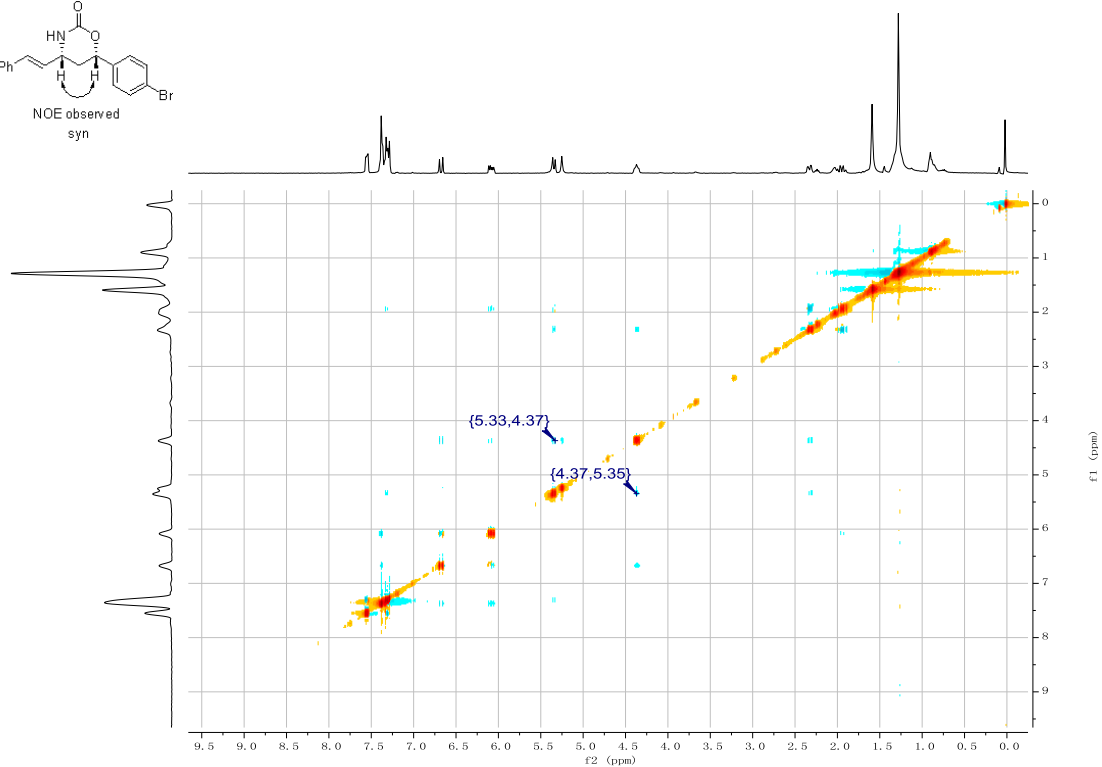

# $^{13}\text{C} \{^1\text{H}\}$ NMR (100 MHz, $\text{CDCl}_3$ )

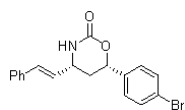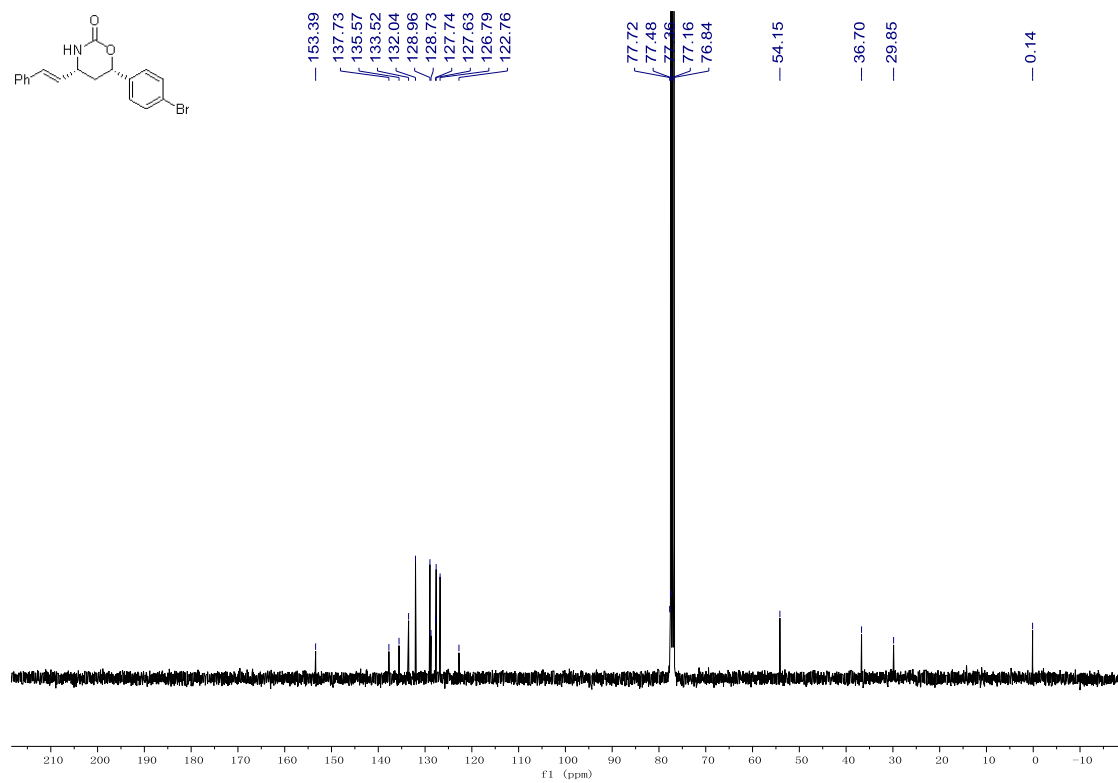

**(S)-2-(1-oxo-5-phenyl-1-(*o*-tolyl)pentan-3-yl)isoindoline-1,3-dione (7)**

<sup>1</sup>H NMR (400 MHz, CDCl<sub>3</sub>)

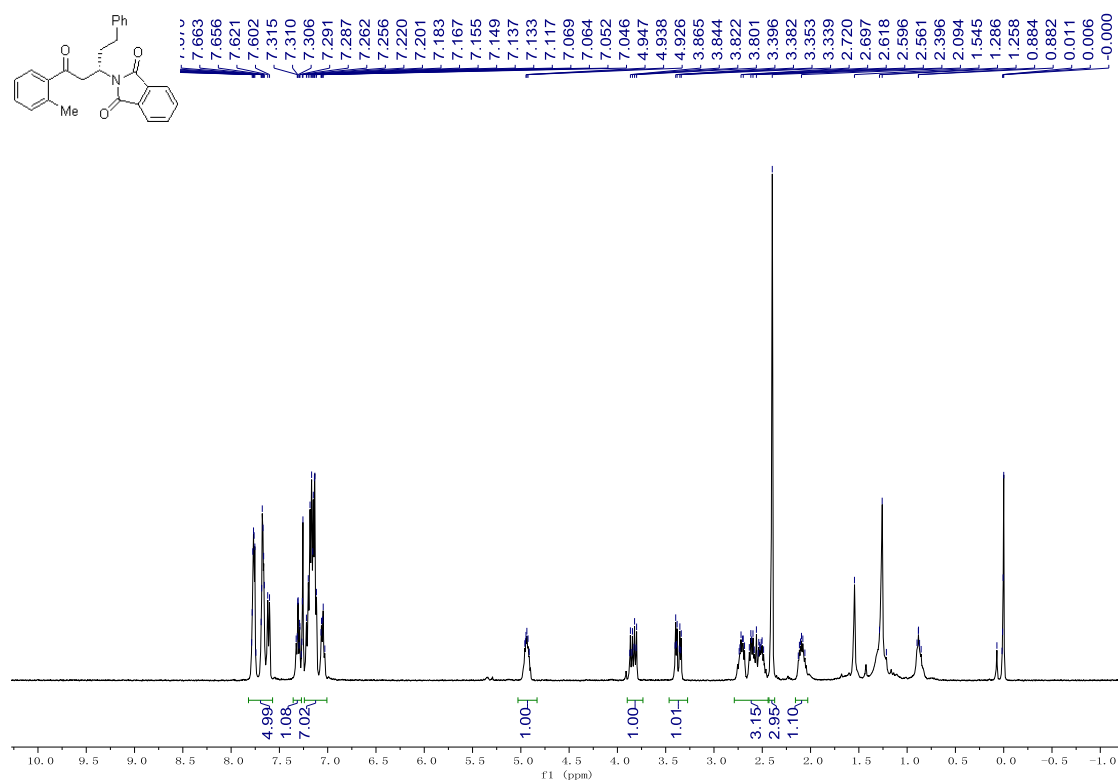

<sup>13</sup>C {<sup>1</sup>H} NMR (100 MHz, CDCl<sub>3</sub>)

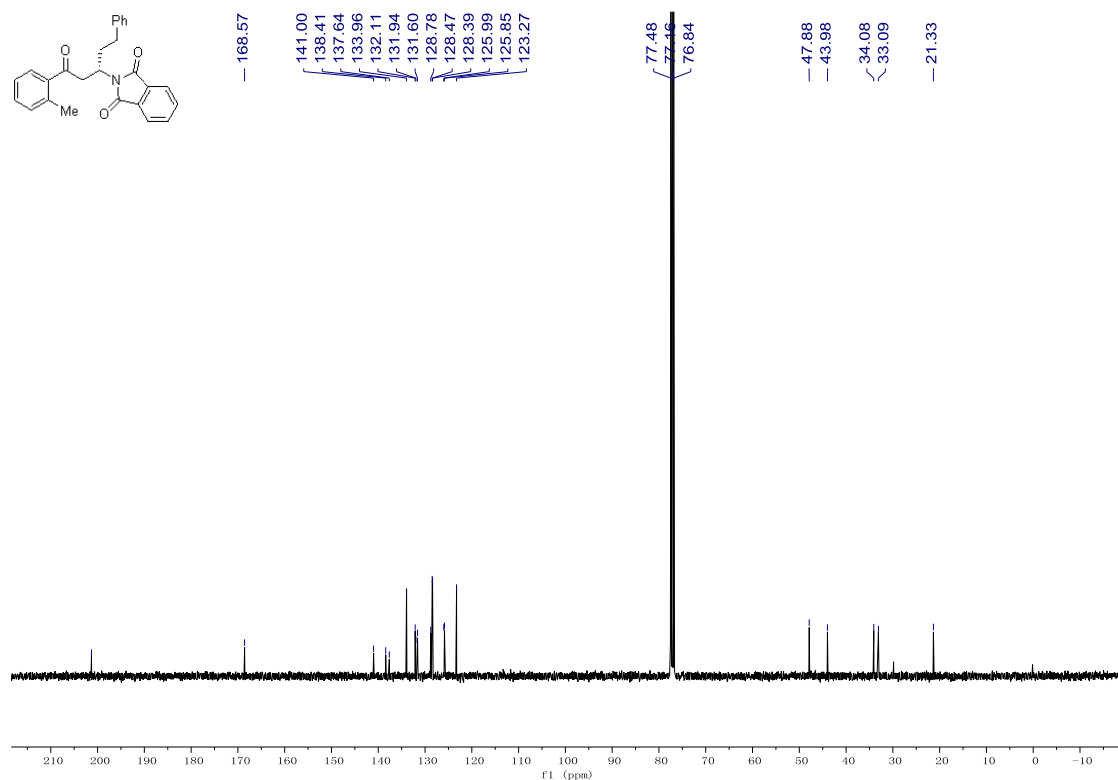

## 9. HPLC traces of optically active compounds

### Compound 3aa

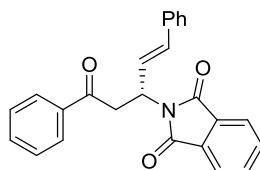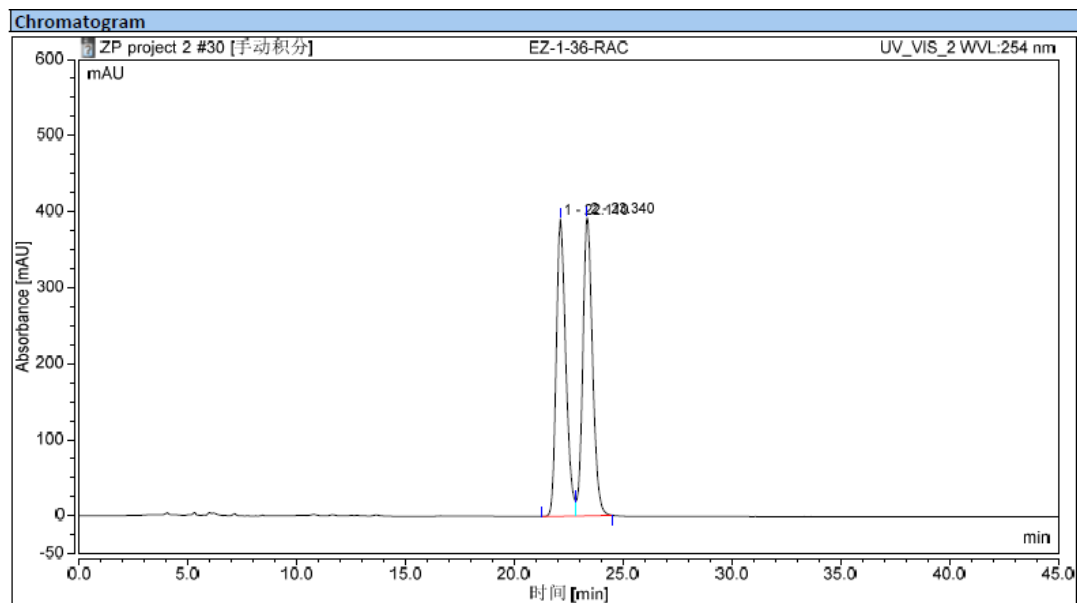

**Integration Results**

| No.    | Peak Name | Retention Time<br>min | Area<br>mAU*min | Height<br>mAU | Relative Area<br>% | Relative Height<br>% | Amount<br>n.a. |
|--------|-----------|-----------------------|-----------------|---------------|--------------------|----------------------|----------------|
| 1      |           | 22.110                | 197.402         | 391.103       | 49.37              | 49.93                | n.a.           |
| 2      |           | 23.340                | 202.470         | 392.249       | 50.63              | 50.07                | n.a.           |
| Total: |           |                       | 399.872         | 783.352       | 100.00             | 100.00               |                |

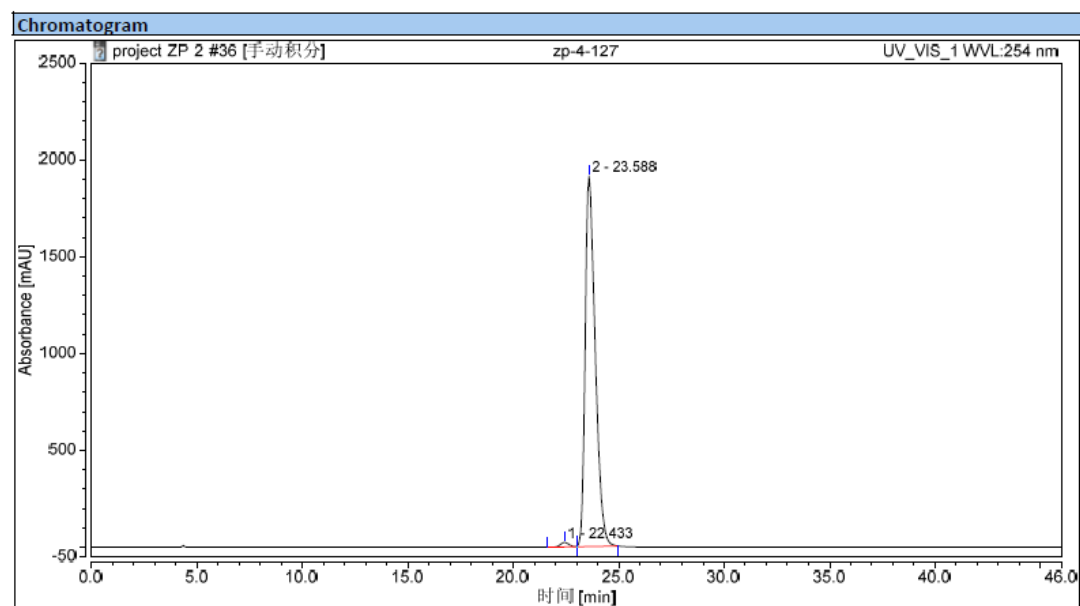

**Integration Results**

| No.    | Peak Name | Retention Time<br>min | Area<br>mAU*min | Height<br>mAU | Relative Area<br>% | Relative Height<br>% | Amount<br>n.a. |
|--------|-----------|-----------------------|-----------------|---------------|--------------------|----------------------|----------------|
| 1      |           | 22.433                | 11.153          | 23.682        | 1.04               | 1.22                 | n.a.           |
| 2      |           | 23.588                | 1056.278        | 1914.193      | 98.96              | 98.78                | n.a.           |
| Total: |           |                       | 1067.431        | 1937.874      | 100.00             | 100.00               |                |

## Compound 3ba

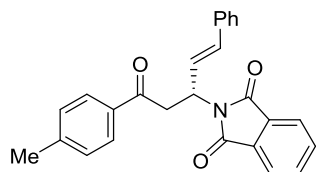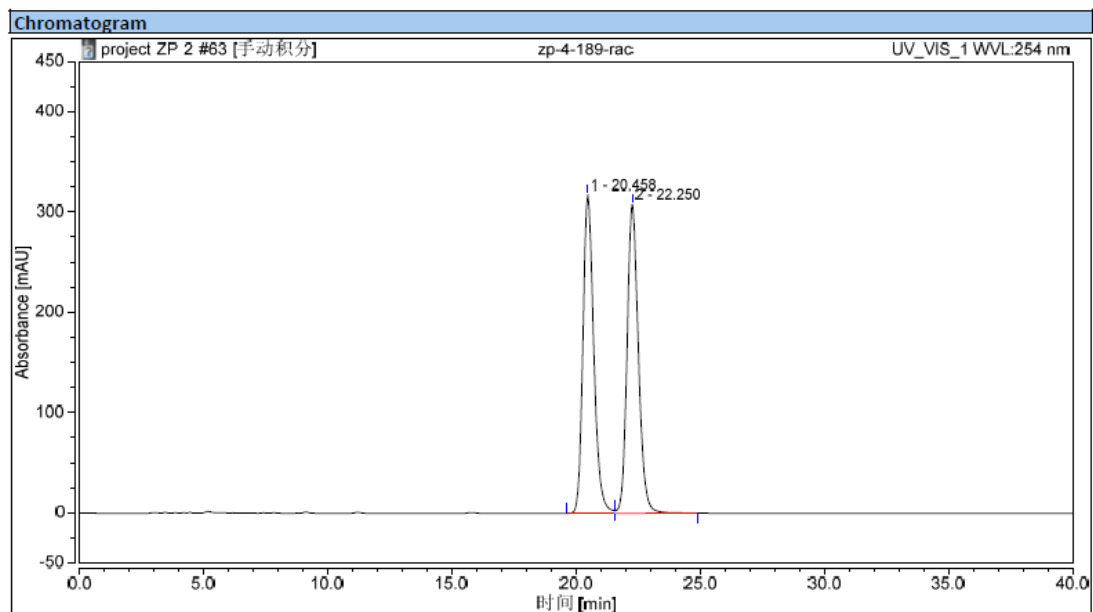

**Integration Results**

| No.    | Peak Name | Retention Time<br>min | Area<br>mAU*min | Height<br>mAU | Relative Area<br>% | Relative Height<br>% | Amount<br>n.a. |
|--------|-----------|-----------------------|-----------------|---------------|--------------------|----------------------|----------------|
| 1      |           | 20.458                | 160.061         | 317.598       | 49.61              | 50.78                | n.a.           |
| 2      |           | 22.250                | 162.586         | 307.900       | 50.39              | 49.22                | n.a.           |
| Total: |           |                       | 322.647         | 625.498       | 100.00             | 100.00               |                |

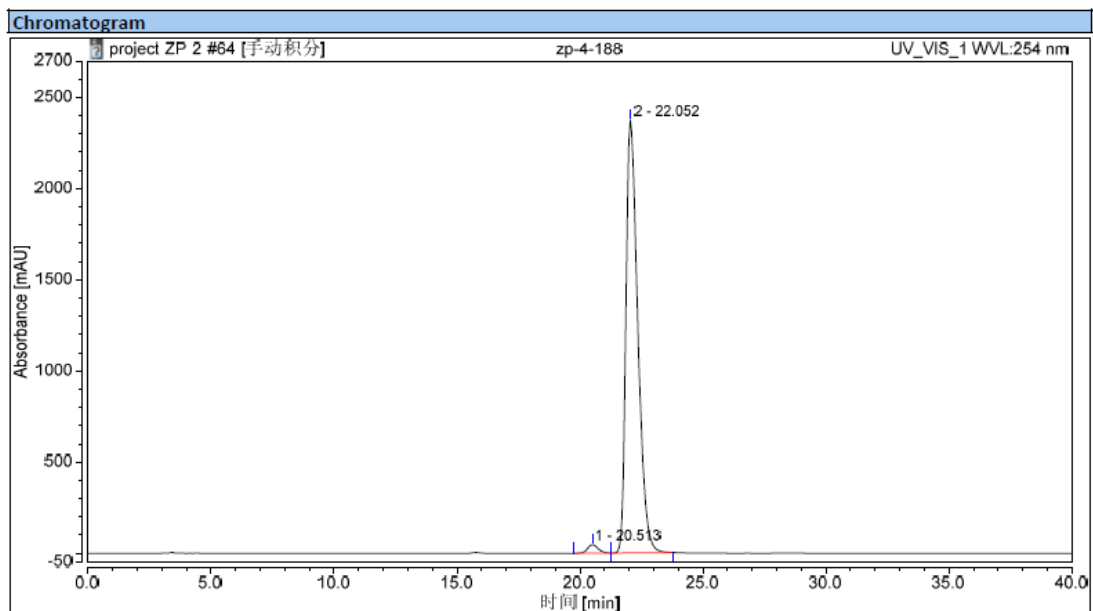

**Integration Results**

| No.    | Peak Name | Retention Time<br>min | Area<br>mAU*min | Height<br>mAU | Relative Area<br>% | Relative Height<br>% | Amount<br>n.a. |
|--------|-----------|-----------------------|-----------------|---------------|--------------------|----------------------|----------------|
| 1      |           | 20.513                | 22.492          | 46.231        | 1.68               | 1.91                 | n.a.           |
| 2      |           | 22.052                | 1319.894        | 2373.051      | 98.32              | 98.09                | n.a.           |
| Total: |           |                       | 1342.386        | 2419.282      | 100.00             | 100.00               |                |

## Compound 3ca

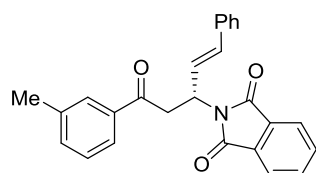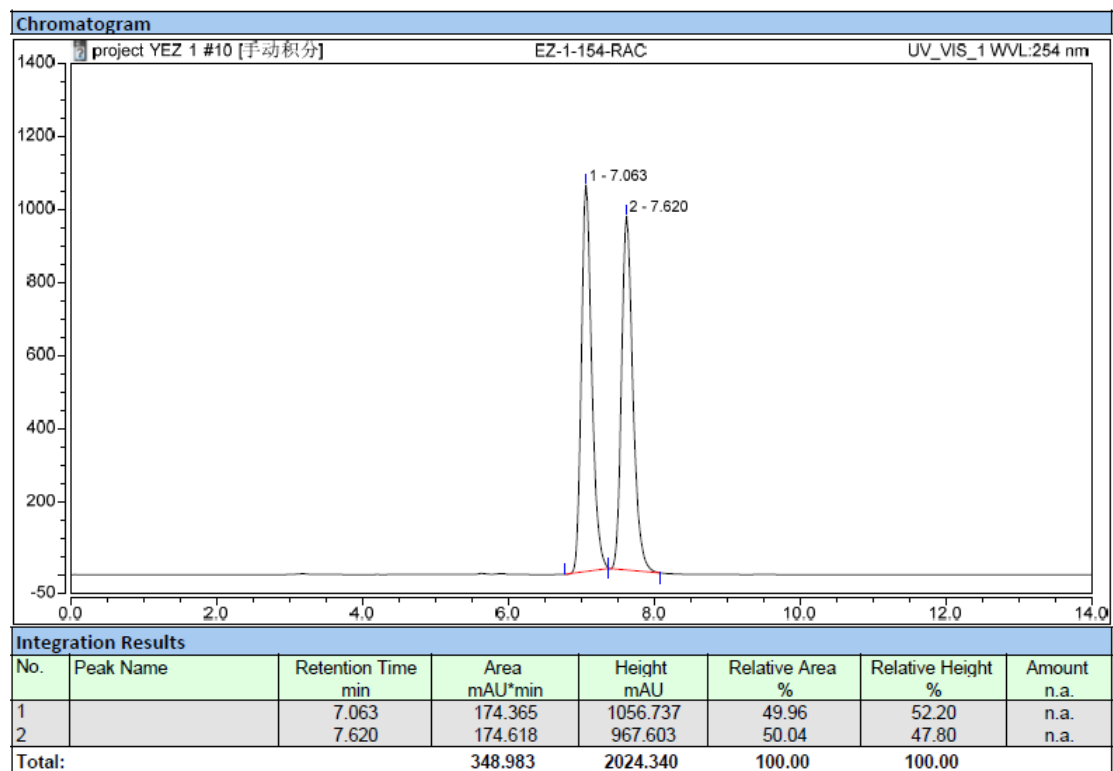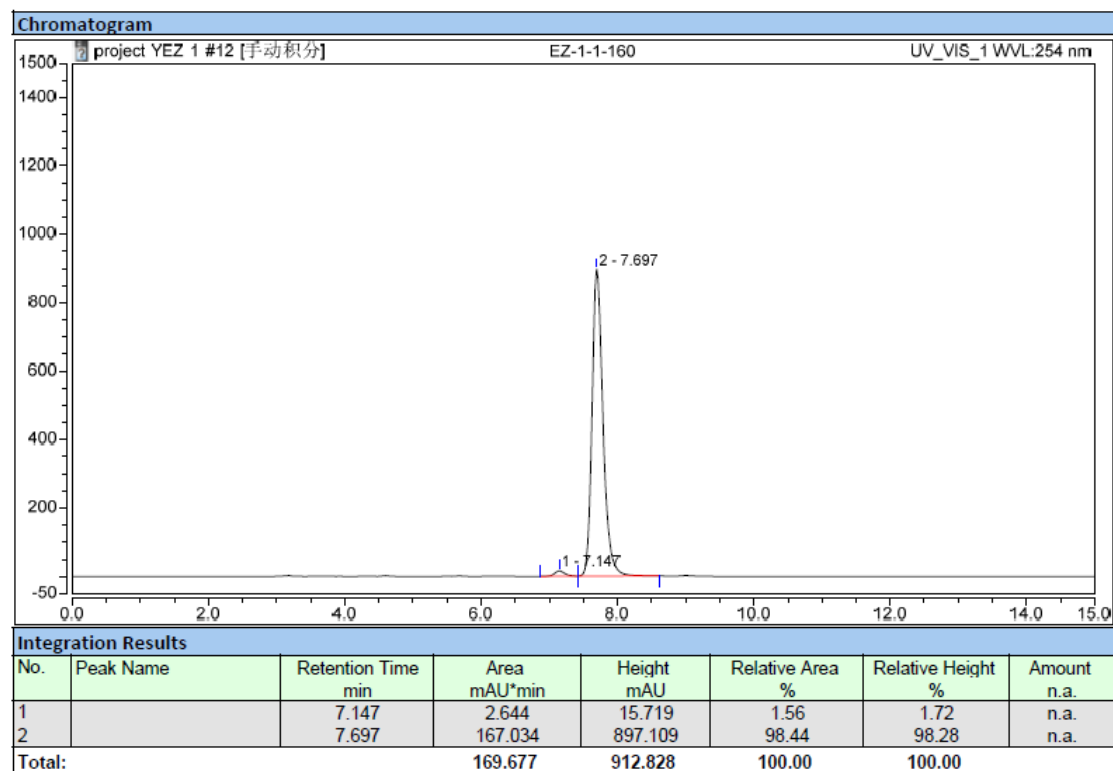

## Compound 3da

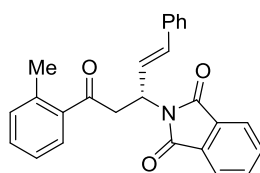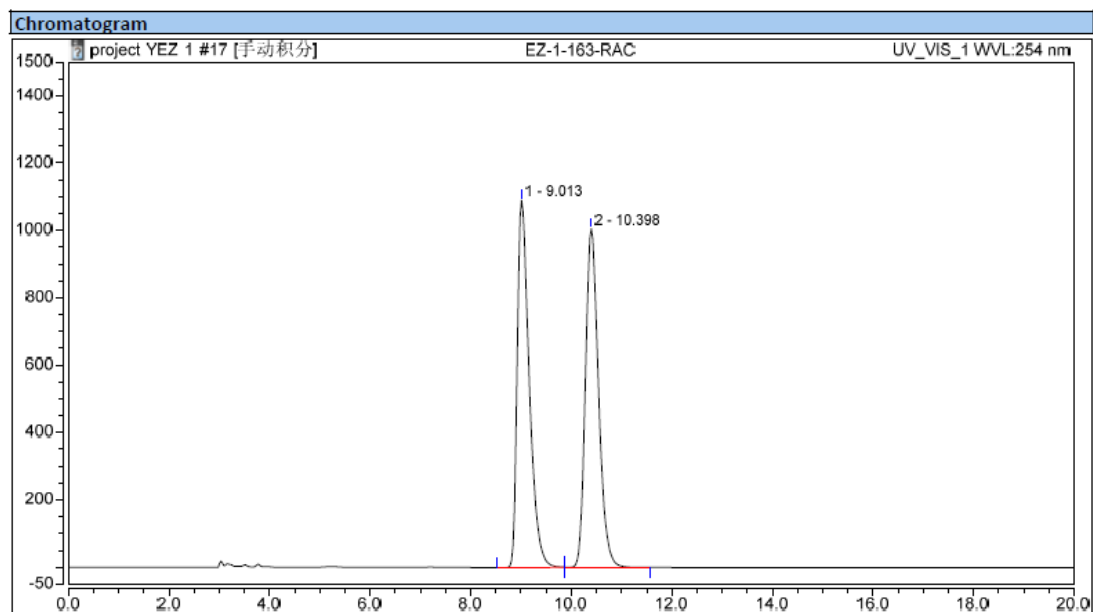

**Integration Results**

| No.           | Peak Name | Retention Time<br>min | Area<br>mAU*min | Height<br>mAU   | Relative Area<br>% | Relative Height<br>% | Amount<br>n.a. |
|---------------|-----------|-----------------------|-----------------|-----------------|--------------------|----------------------|----------------|
| 1             |           | 9.013                 | 301.628         | 1091.006        | 49.87              | 52.03                | n.a.           |
| 2             |           | 10.398                | 303.172         | 1005.761        | 50.13              | 47.97                | n.a.           |
| <b>Total:</b> |           |                       | <b>604.800</b>  | <b>2096.767</b> | <b>100.00</b>      | <b>100.00</b>        |                |

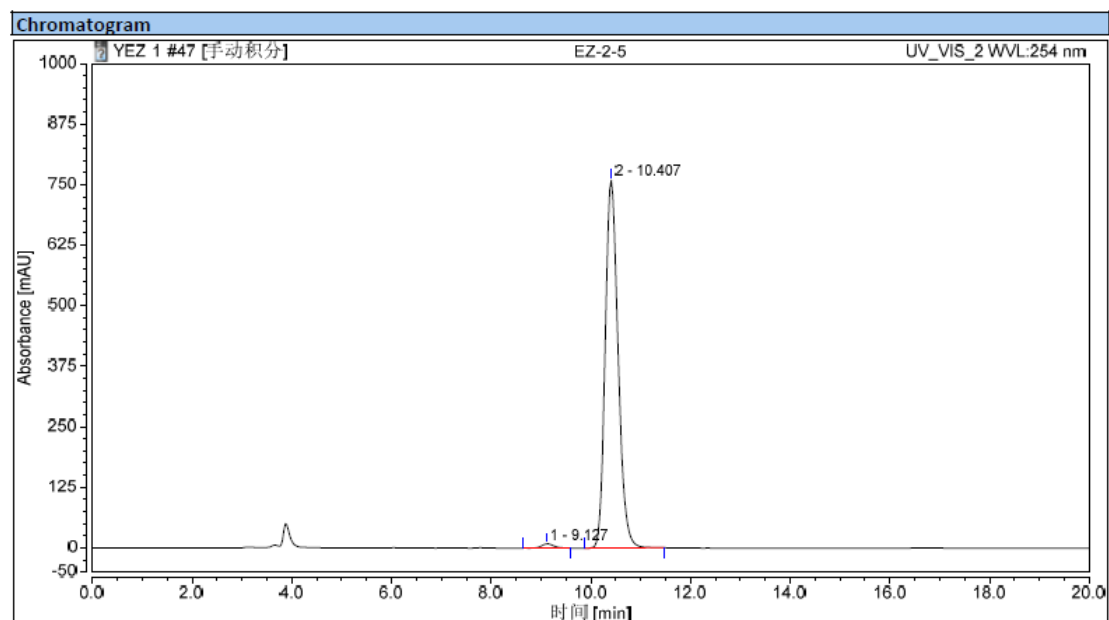

**Integration Results**

| No.           | Peak Name | Retention Time<br>min | Area<br>mAU*min | Height<br>mAU  | Relative Area<br>% | Relative Height<br>% | Amount<br>n.a. |
|---------------|-----------|-----------------------|-----------------|----------------|--------------------|----------------------|----------------|
| 1             |           | 9.127                 | 2.348           | 8.671          | 1.03               | 1.13                 | n.a.           |
| 2             |           | 10.407                | 226.335         | 759.875        | 98.97              | 98.87                | n.a.           |
| <b>Total:</b> |           |                       | <b>228.684</b>  | <b>768.546</b> | <b>100.00</b>      | <b>100.00</b>        |                |

## Compound 3ea

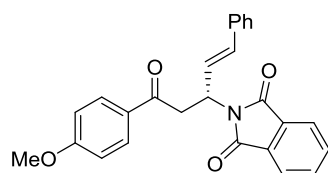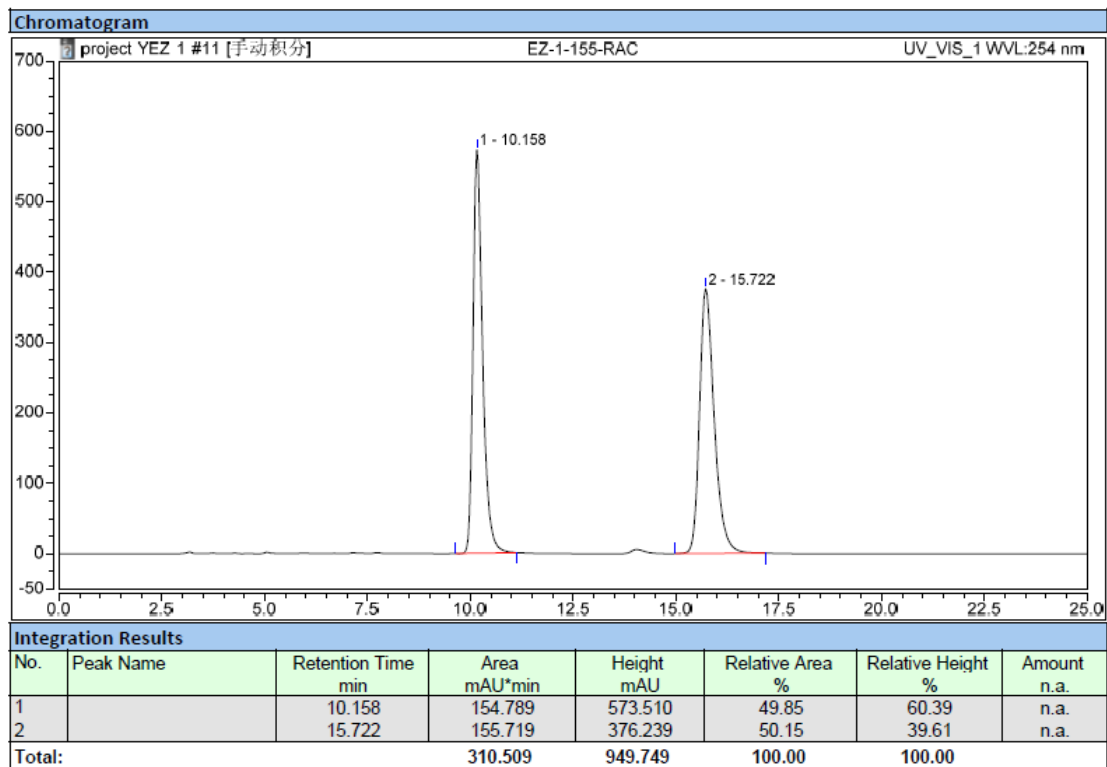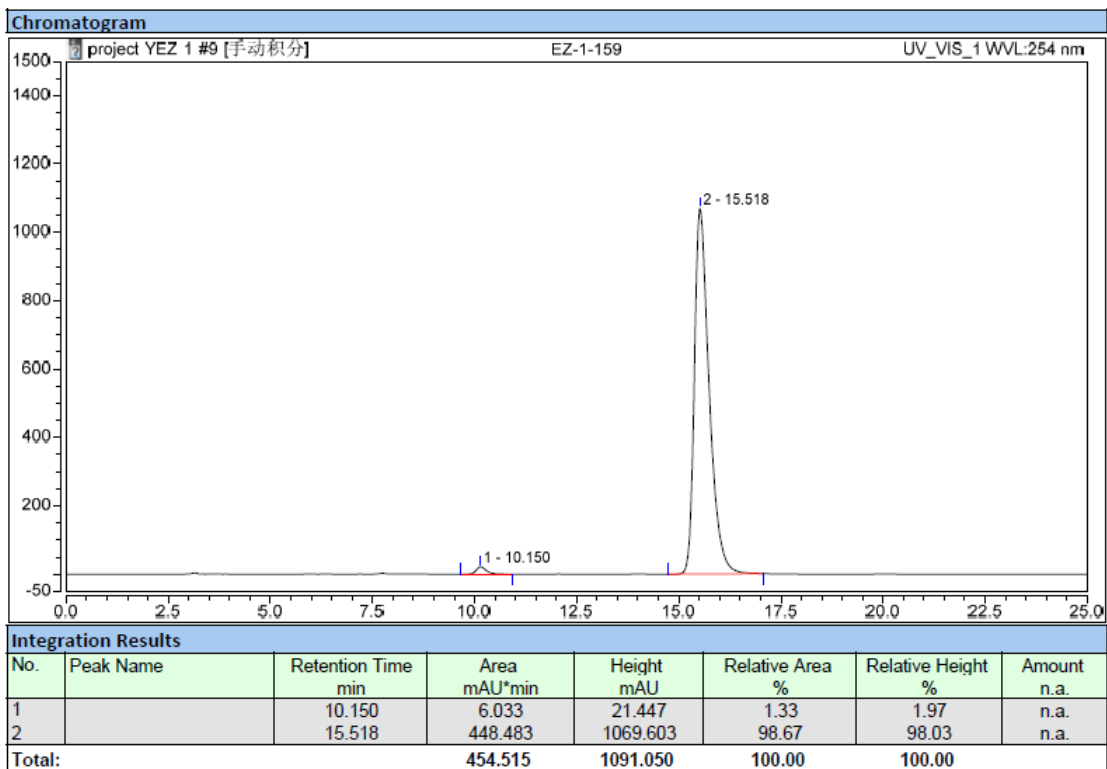

## Compound 3fa

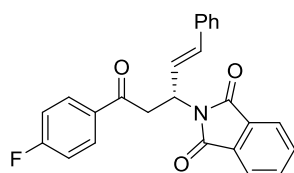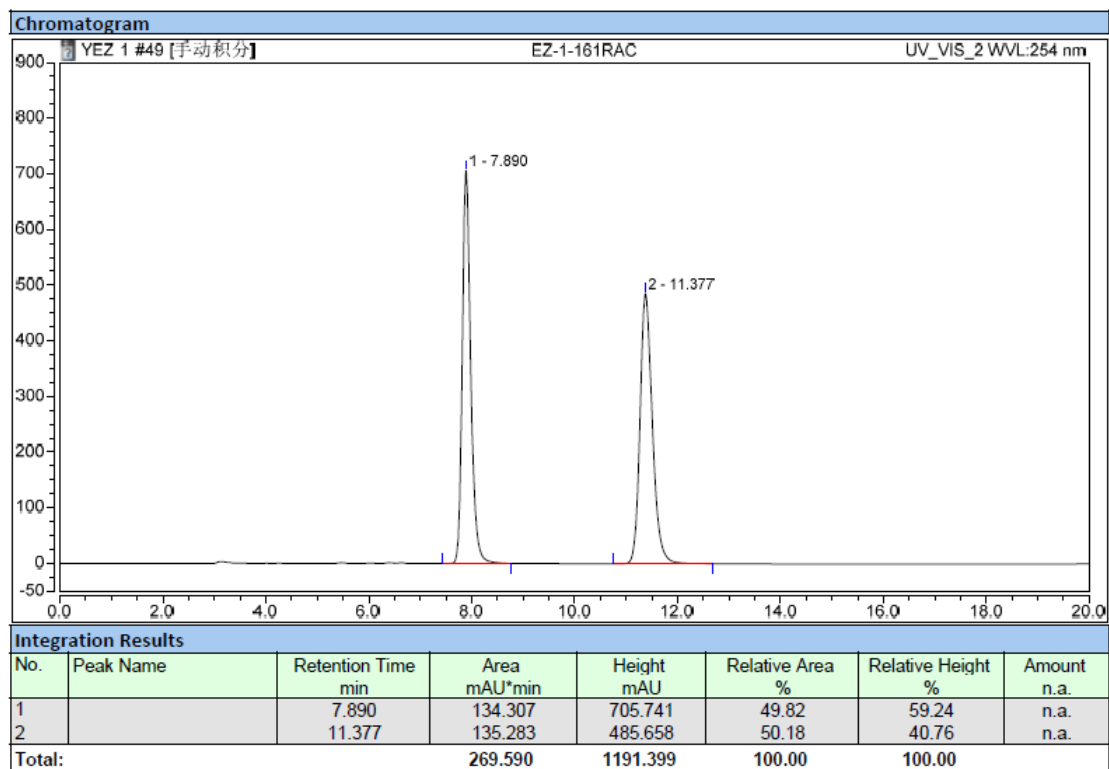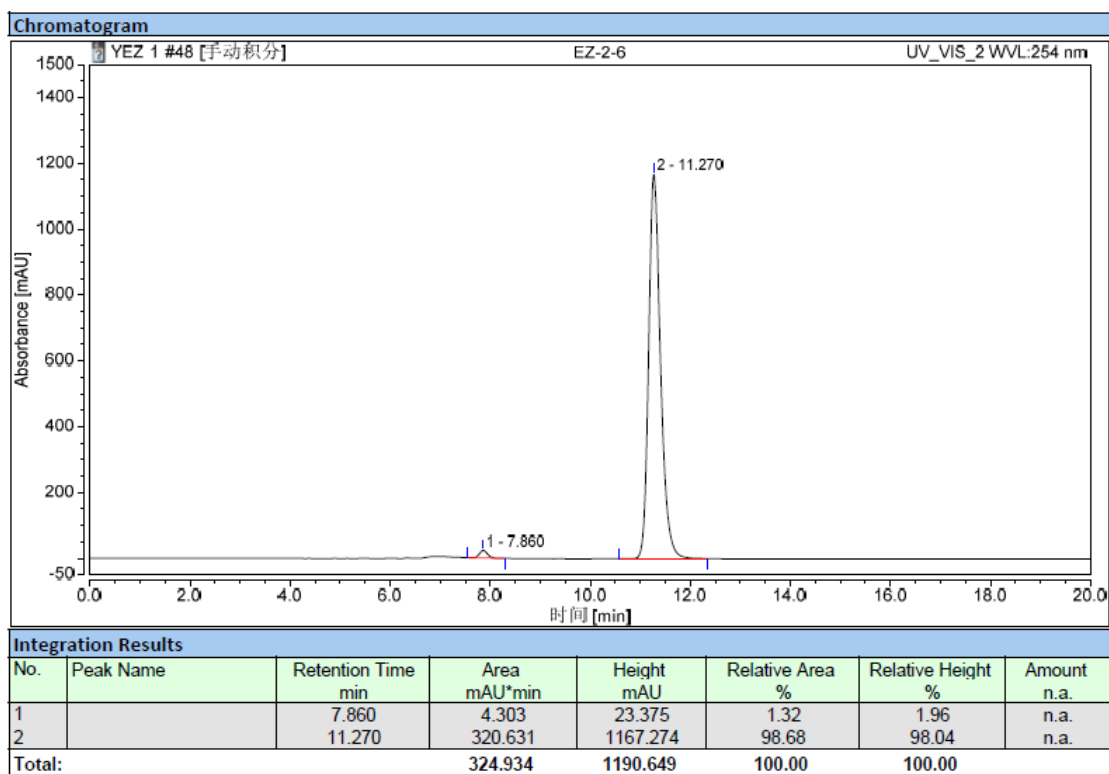



## Compound 3ga

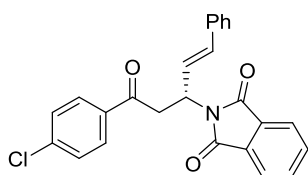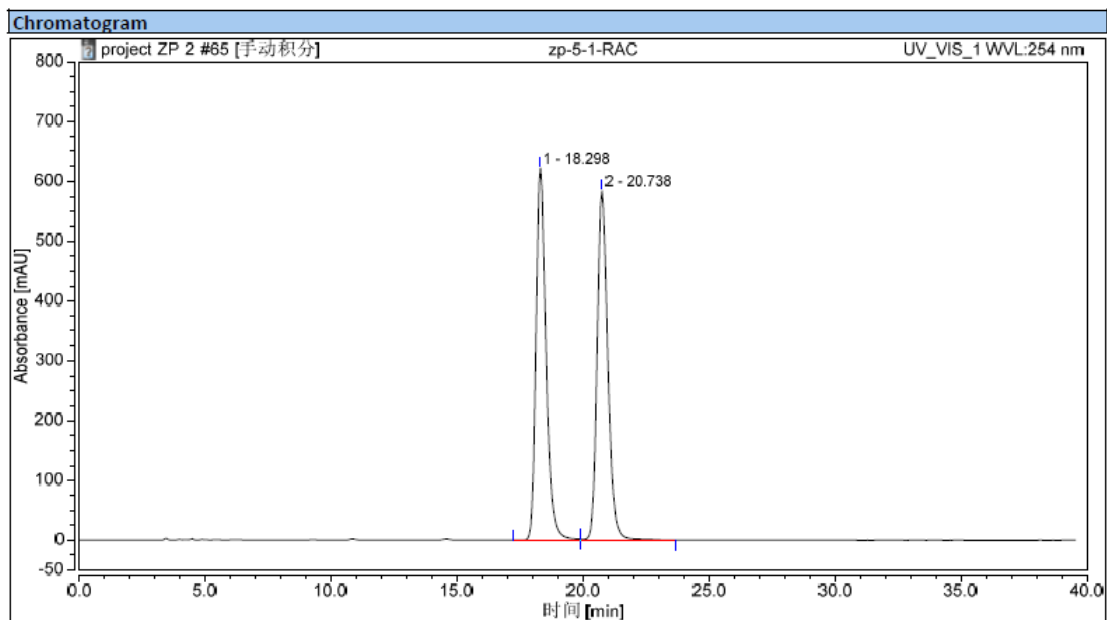

**Integration Results**

| No.           | Peak Name | Retention Time<br>min | Area<br>mAU*min | Height<br>mAU   | Relative Area<br>% | Relative Height<br>% | Amount<br>n.a. |
|---------------|-----------|-----------------------|-----------------|-----------------|--------------------|----------------------|----------------|
| 1             |           | 18.298                | 286.834         | 622.124         | 49.81              | 51.57                | n.a.           |
| 2             |           | 20.738                | 289.071         | 584.183         | 50.19              | 48.43                | n.a.           |
| <b>Total:</b> |           |                       | <b>575.905</b>  | <b>1206.307</b> | <b>100.00</b>      | <b>100.00</b>        |                |

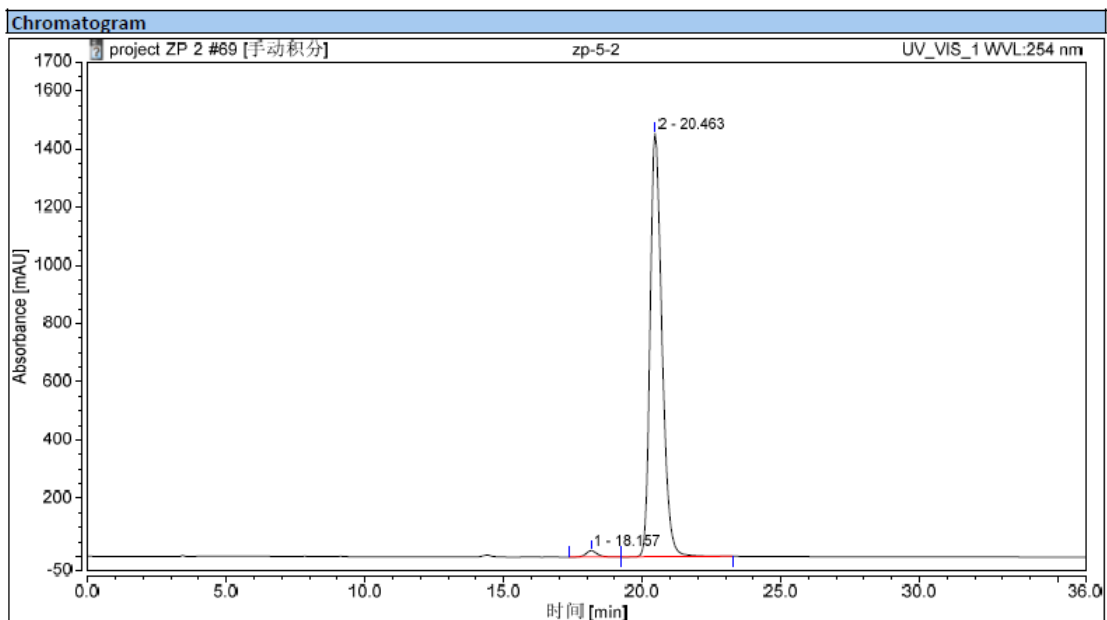

**Integration Results**

| No.           | Peak Name | Retention Time<br>min | Area<br>mAU*min | Height<br>mAU   | Relative Area<br>% | Relative Height<br>% | Amount<br>n.a. |
|---------------|-----------|-----------------------|-----------------|-----------------|--------------------|----------------------|----------------|
| 1             |           | 18.157                | 9.451           | 21.491          | 1.29               | 1.46                 | n.a.           |
| 2             |           | 20.463                | 720.523         | 1455.228        | 98.71              | 98.54                | n.a.           |
| <b>Total:</b> |           |                       | <b>729.974</b>  | <b>1476.719</b> | <b>100.00</b>      | <b>100.00</b>        |                |

## Compound 3ha

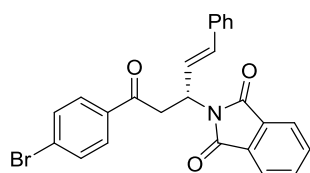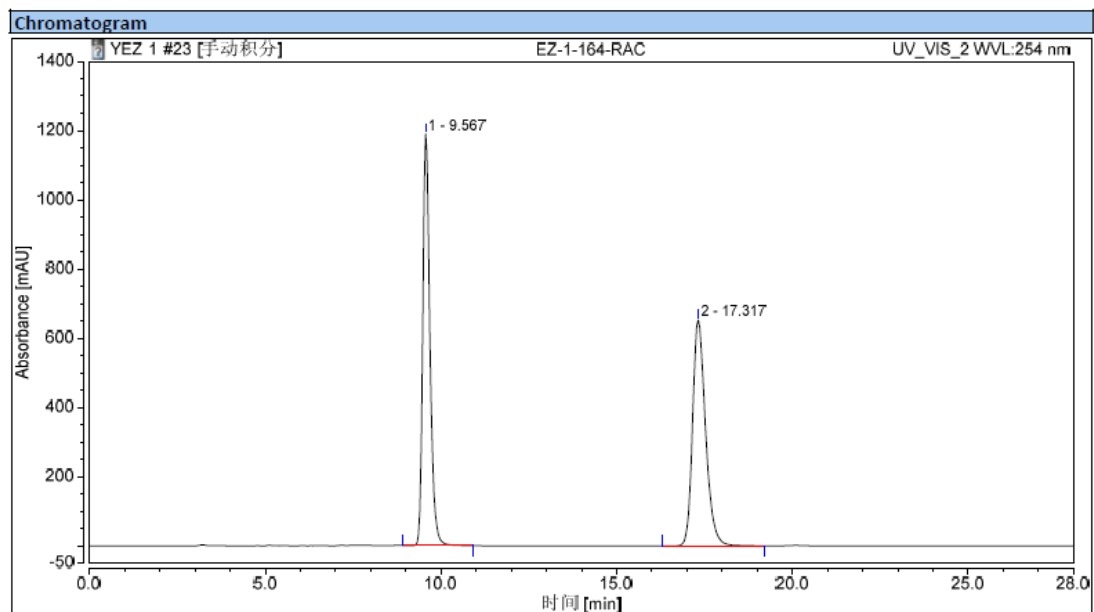

**Integration Results**

| No.           | Peak Name | Retention Time min | Area mAU*min   | Height mAU      | Relative Area % | Relative Height % | Amount |
|---------------|-----------|--------------------|----------------|-----------------|-----------------|-------------------|--------|
| 1             |           | 9.567              | 278.093        | 1188.759        | 49.96           | 64.56             | n.a.   |
| 2             |           | 17.317             | 278.576        | 652.646         | 50.04           | 35.44             | n.a.   |
| <b>Total:</b> |           |                    | <b>556.669</b> | <b>1841.405</b> | <b>100.00</b>   | <b>100.00</b>     |        |

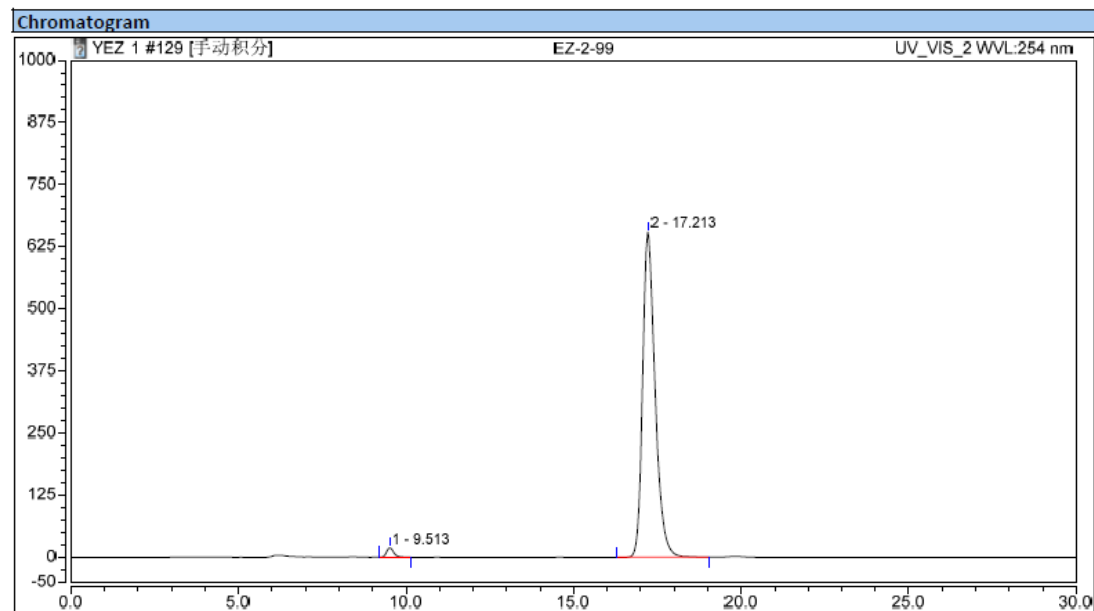

**Integration Results**

| No.           | Peak Name | Retention Time min | Area mAU*min   | Height mAU     | Relative Area % | Relative Height % | Amount |
|---------------|-----------|--------------------|----------------|----------------|-----------------|-------------------|--------|
| 1             |           | 9.513              | 4.617          | 18.902         | 1.61            | 2.81              | n.a.   |
| 2             |           | 17.213             | 282.500        | 654.105        | 98.39           | 97.19             | n.a.   |
| <b>Total:</b> |           |                    | <b>287.117</b> | <b>673.007</b> | <b>100.00</b>   | <b>100.00</b>     |        |

### Compound 3ha (scale-up version)

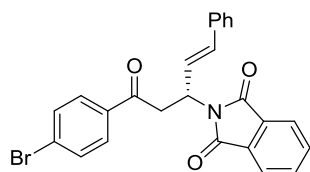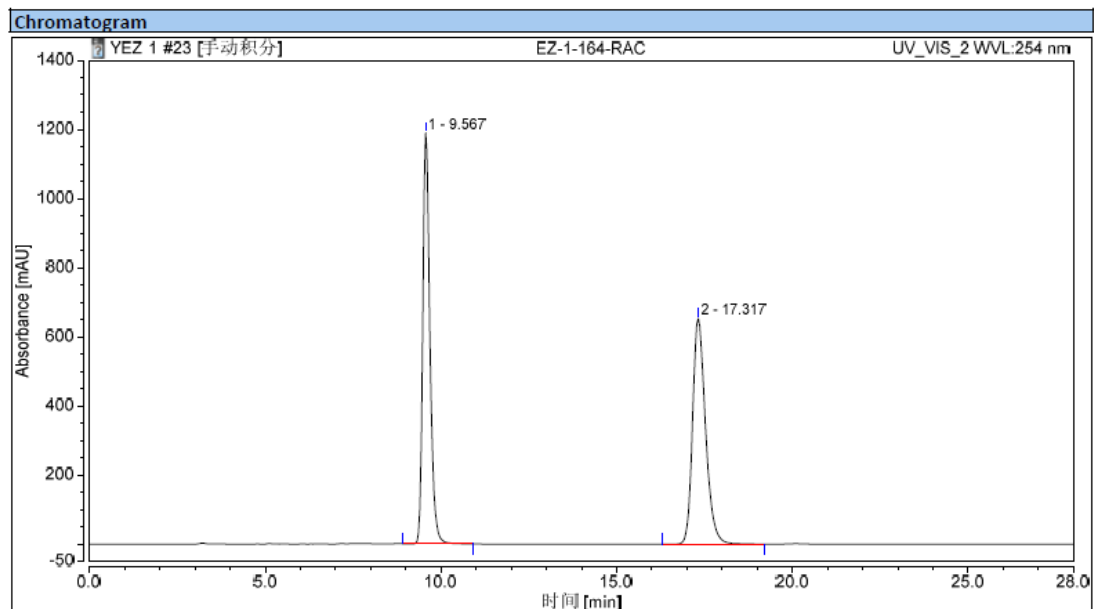

**Integration Results**

| No.    | Peak Name | Retention Time min | Area mAU*min | Height mAU | Relative Area % | Relative Height % | Amount n.a. |
|--------|-----------|--------------------|--------------|------------|-----------------|-------------------|-------------|
| 1      |           | 9.567              | 278.093      | 1188.759   | 49.96           | 64.56             | n.a.        |
| 2      |           | 17.317             | 278.576      | 652.646    | 50.04           | 35.44             | n.a.        |
| Total: |           |                    | 556.669      | 1841.405   | 100.00          | 100.00            |             |

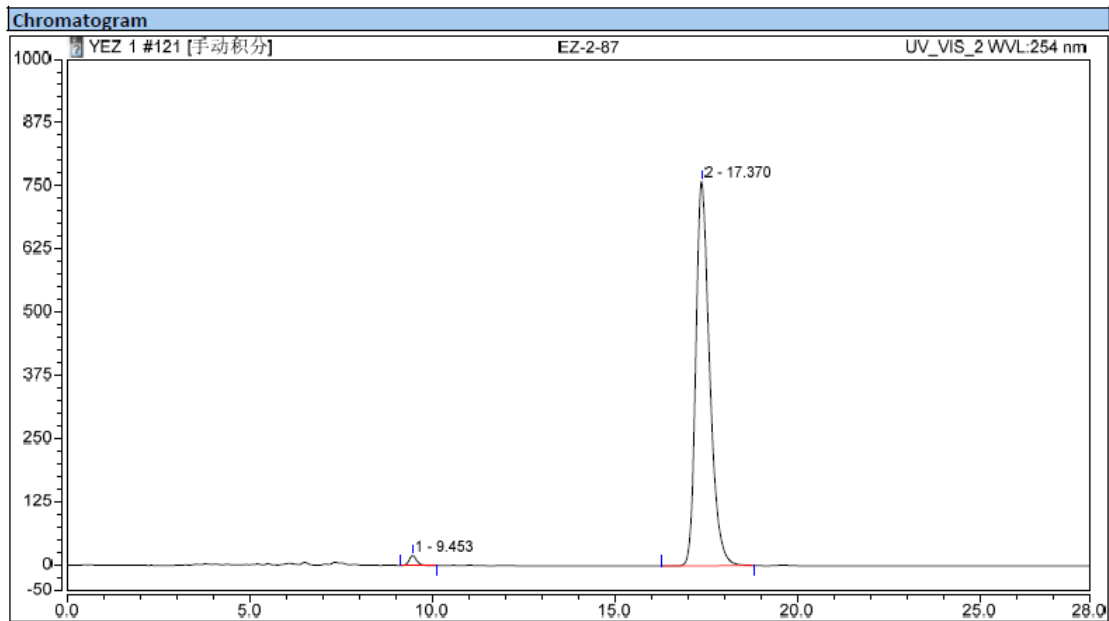

**Integration Results**

| No.    | Peak Name | Retention Time min | Area mAU*min | Height mAU | Relative Area % | Relative Height % | Amount n.a. |
|--------|-----------|--------------------|--------------|------------|-----------------|-------------------|-------------|
| 1      |           | 9.453              | 4.714        | 19.716     | 1.40            | 2.53              | n.a.        |
| 2      |           | 17.370             | 332.997      | 760.239    | 98.60           | 97.47             | n.a.        |
| Total: |           |                    | 337.711      | 779.955    | 100.00          | 100.00            |             |

## Compound 3ia

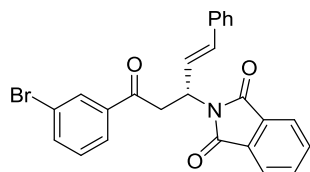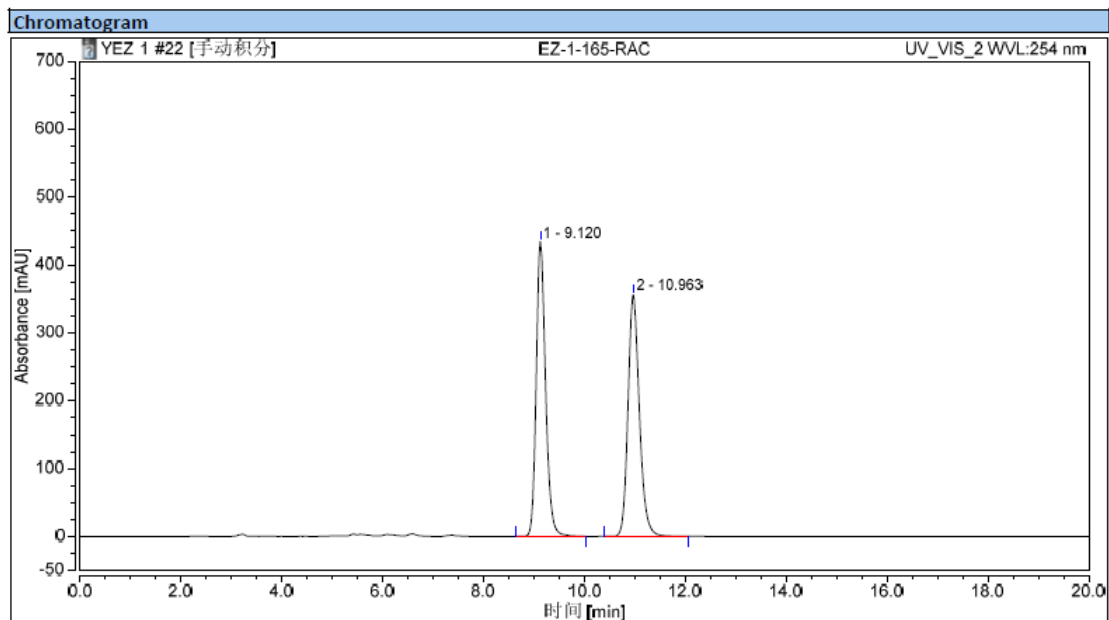

**Integration Results**

| No.           | Peak Name | Retention Time min | Area mAU*min   | Height mAU     | Relative Area % | Relative Height % | Amount n.a. |
|---------------|-----------|--------------------|----------------|----------------|-----------------|-------------------|-------------|
| 1             |           | 9.120              | 92.335         | 433.945        | 50.09           | 54.96             | n.a.        |
| 2             |           | 10.963             | 92.009         | 355.570        | 49.91           | 45.04             | n.a.        |
| <b>Total:</b> |           |                    | <b>184.344</b> | <b>789.515</b> | <b>100.00</b>   | <b>100.00</b>     |             |

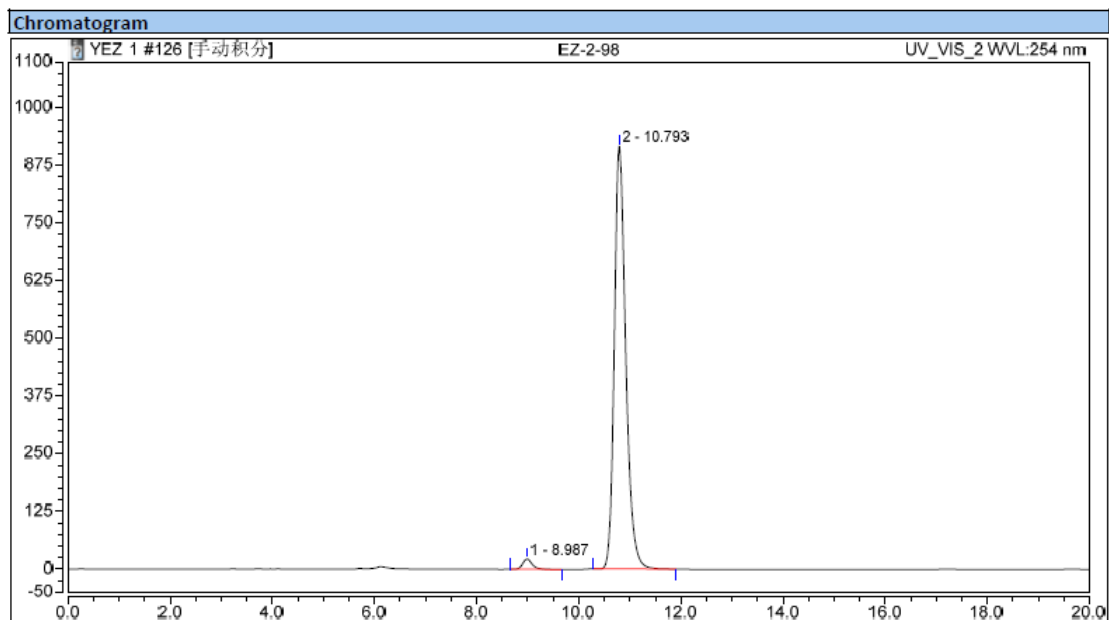

**Integration Results**

| No.           | Peak Name | Retention Time min | Area mAU*min   | Height mAU     | Relative Area % | Relative Height % | Amount n.a. |
|---------------|-----------|--------------------|----------------|----------------|-----------------|-------------------|-------------|
| 1             |           | 8.987              | 4.816          | 22.461         | 1.98            | 2.39              | n.a.        |
| 2             |           | 10.793             | 238.309        | 917.078        | 98.02           | 97.61             | n.a.        |
| <b>Total:</b> |           |                    | <b>243.125</b> | <b>939.540</b> | <b>100.00</b>   | <b>100.00</b>     |             |

## Compound 3ja

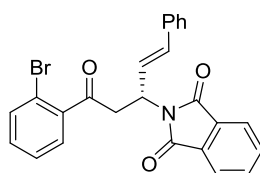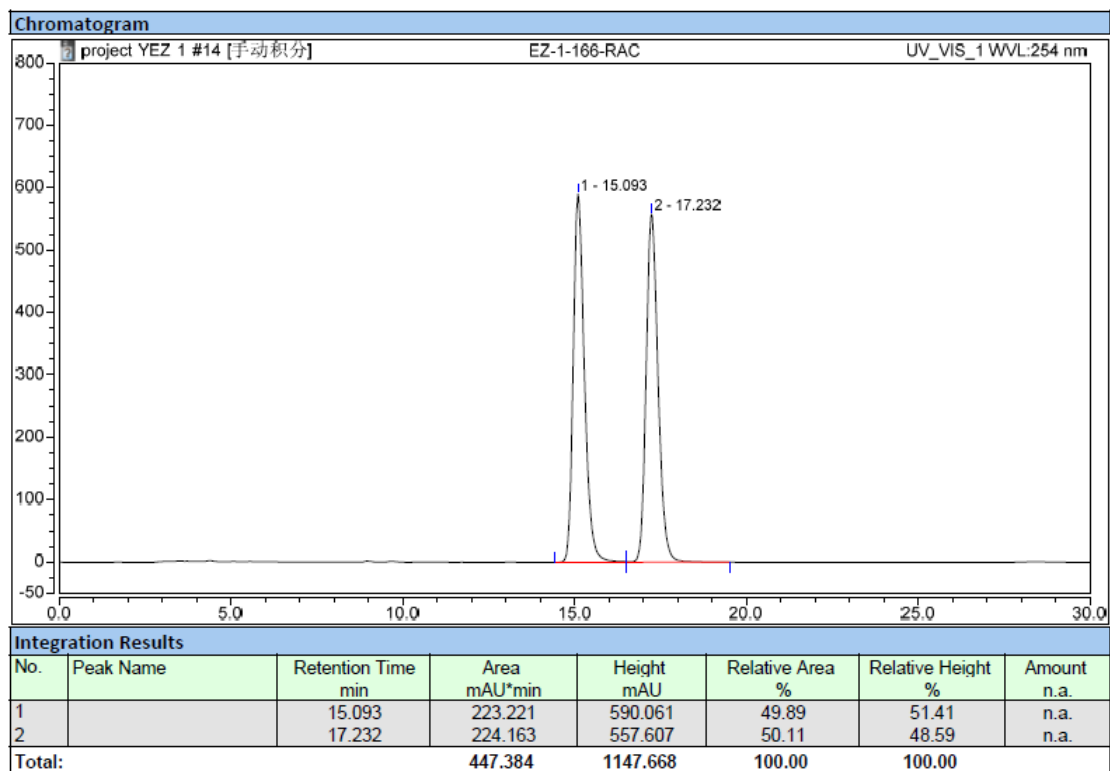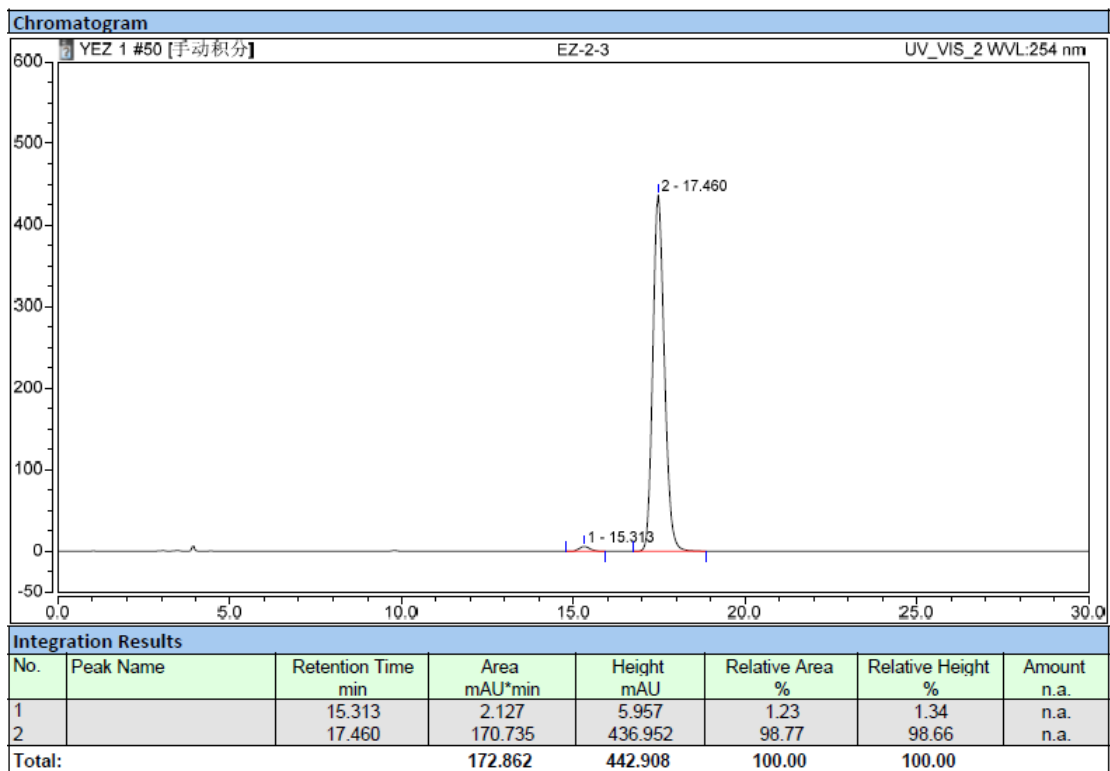

## Compound 3ka

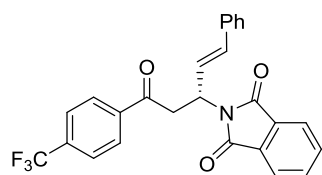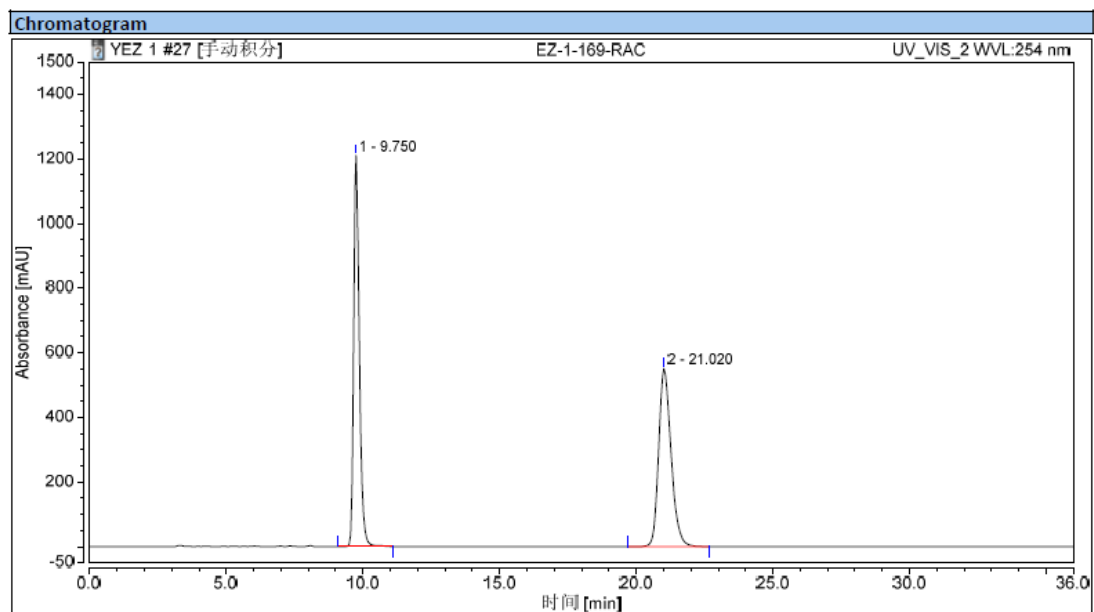

**Integration Results**

| No.           | Peak Name | Retention Time min | Area mAU*min   | Height mAU      | Relative Area % | Relative Height % | Amount |
|---------------|-----------|--------------------|----------------|-----------------|-----------------|-------------------|--------|
| 1             |           | 9.750              | 289.864        | 1209.882        | 50.05           | 68.73             | n.a.   |
| 2             |           | 21.020             | 289.250        | 550.540         | 49.95           | 31.27             | n.a.   |
| <b>Total:</b> |           |                    | <b>579.114</b> | <b>1760.422</b> | <b>100.00</b>   | <b>100.00</b>     |        |

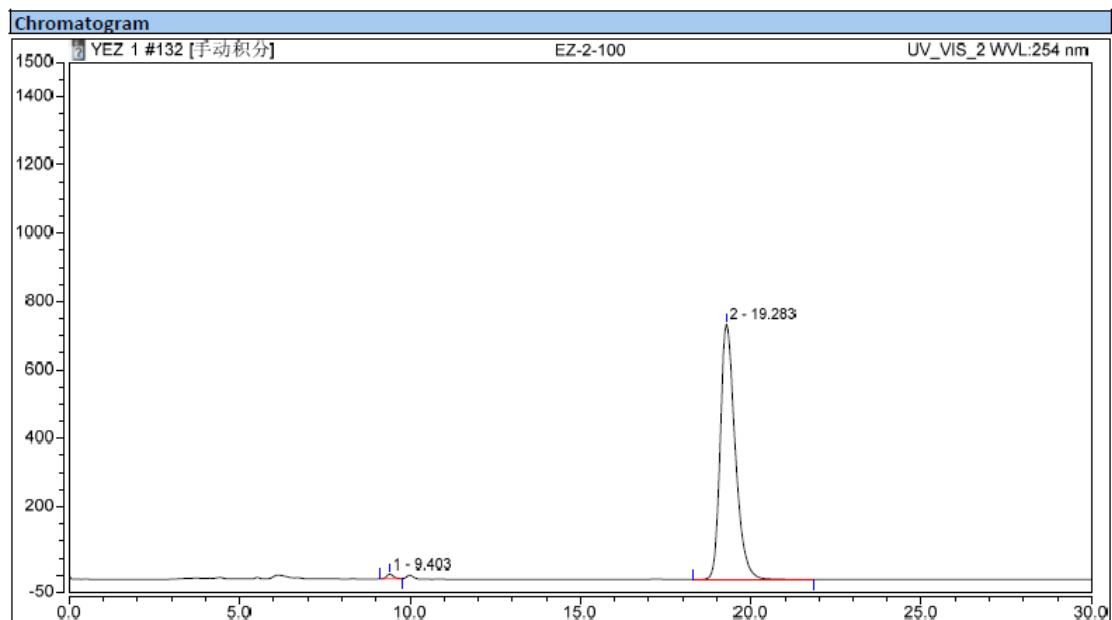

**Integration Results**

| No.           | Peak Name | Retention Time min | Area mAU*min   | Height mAU     | Relative Area % | Relative Height % | Amount |
|---------------|-----------|--------------------|----------------|----------------|-----------------|-------------------|--------|
| 1             |           | 9.403              | 3.159          | 13.874         | 0.83            | 1.82              | n.a.   |
| 2             |           | 19.283             | 378.218        | 747.291        | 99.17           | 98.18             | n.a.   |
| <b>Total:</b> |           |                    | <b>381.377</b> | <b>761.165</b> | <b>100.00</b>   | <b>100.00</b>     |        |

## Compound 3la

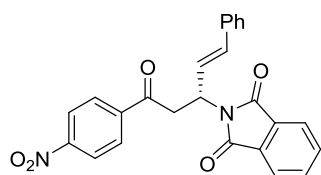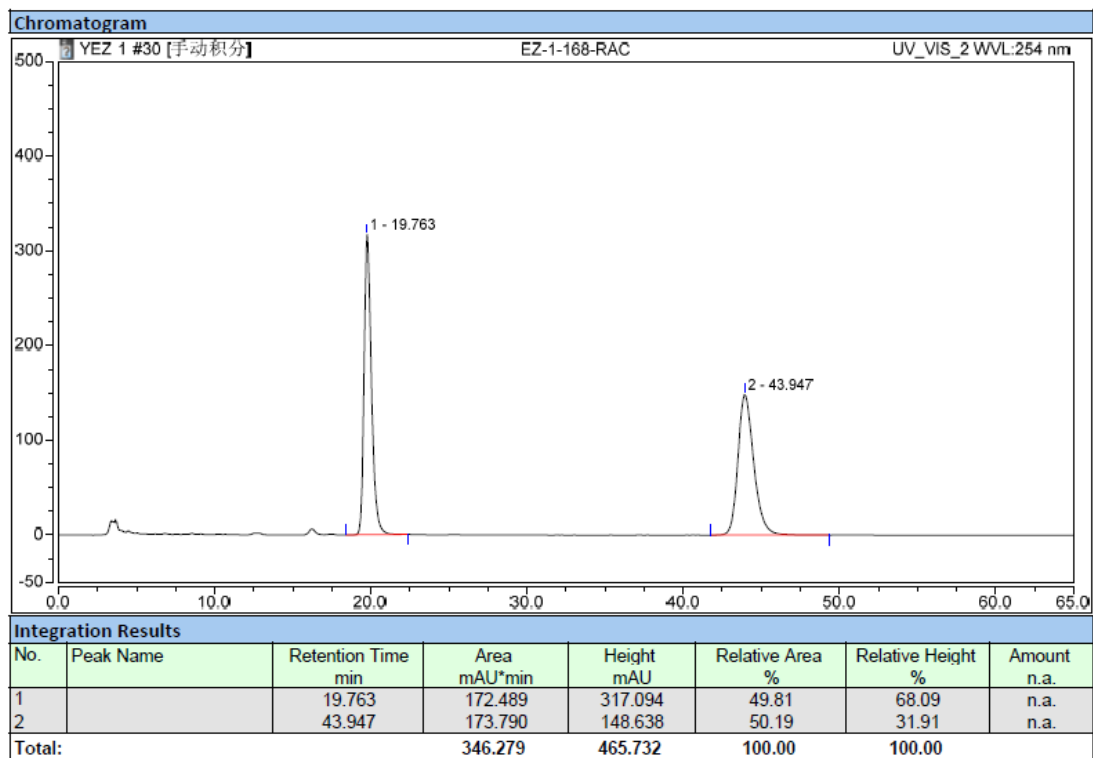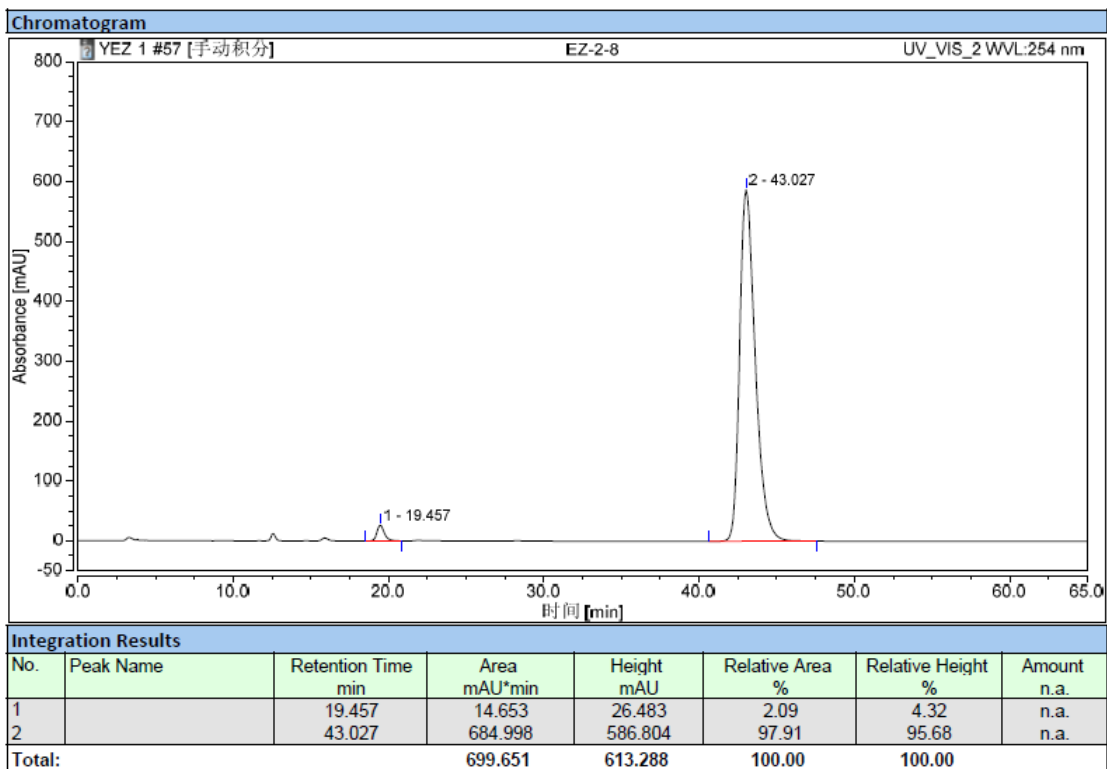

## Compound 3ma

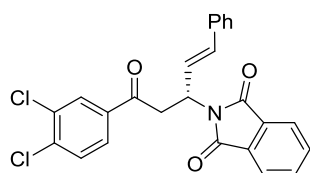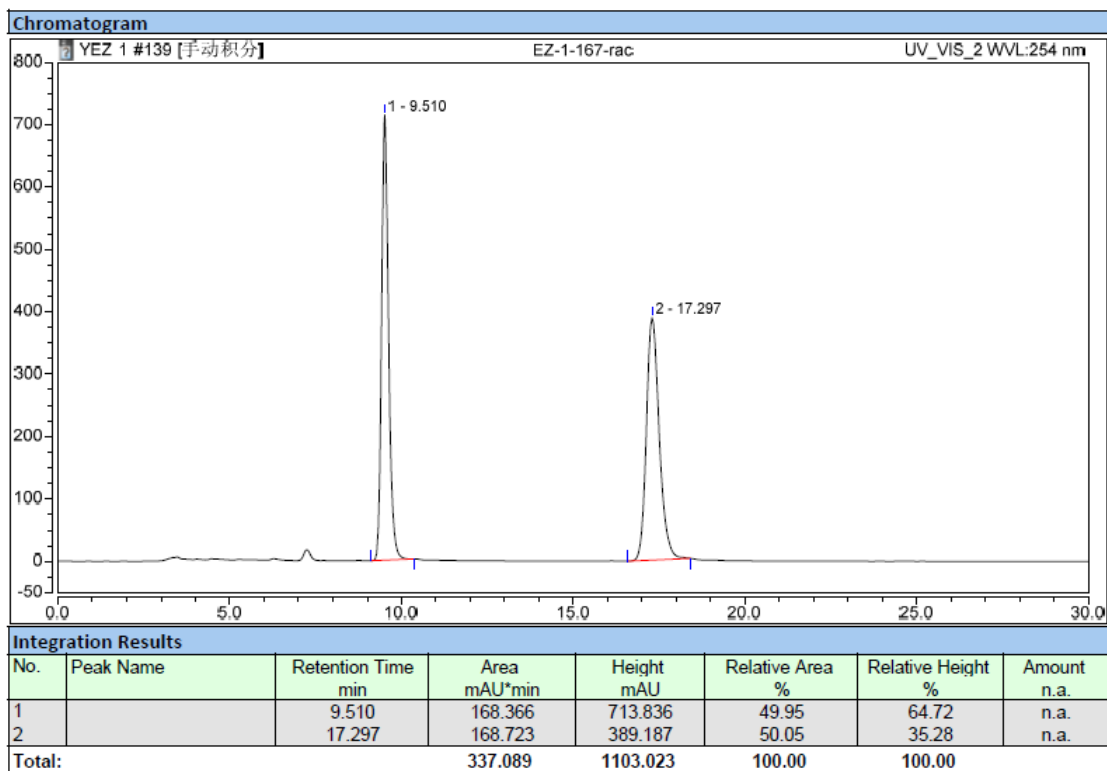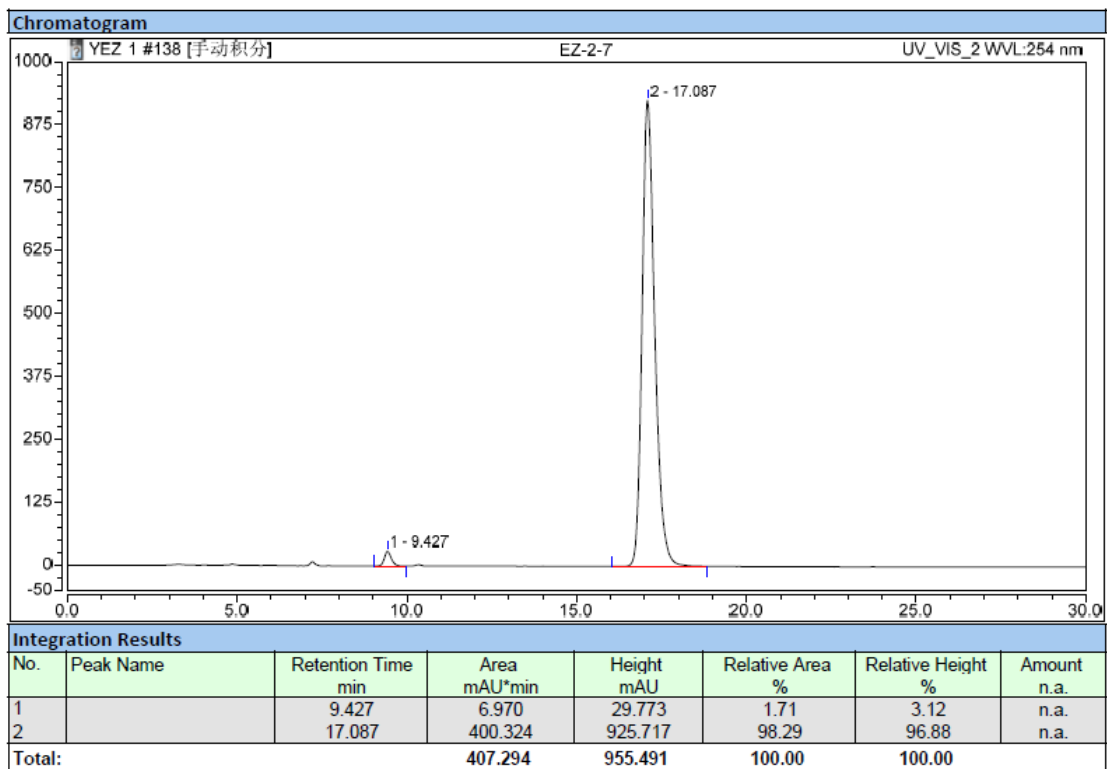



## Compound 3na

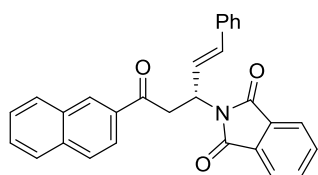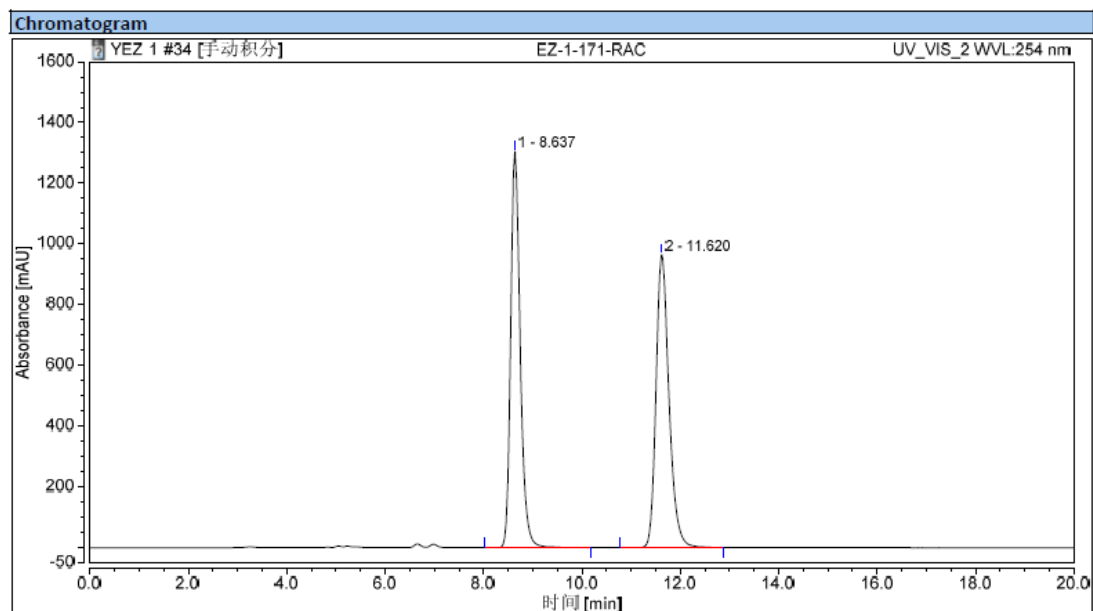

**Integration Results**

| No.    | Peak Name | Retention Time<br>min | Area<br>mAU*min | Height<br>mAU | Relative Area<br>% | Relative Height<br>% | Amount<br>n.a. |
|--------|-----------|-----------------------|-----------------|---------------|--------------------|----------------------|----------------|
| 1      |           | 8.637                 | 291.465         | 1302.837      | 49.77              | 57.47                | n.a.           |
| 2      |           | 11.620                | 294.115         | 964.270       | 50.23              | 42.53                | n.a.           |
| Total: |           |                       | 585.580         | 2267.107      | 100.00             | 100.00               |                |

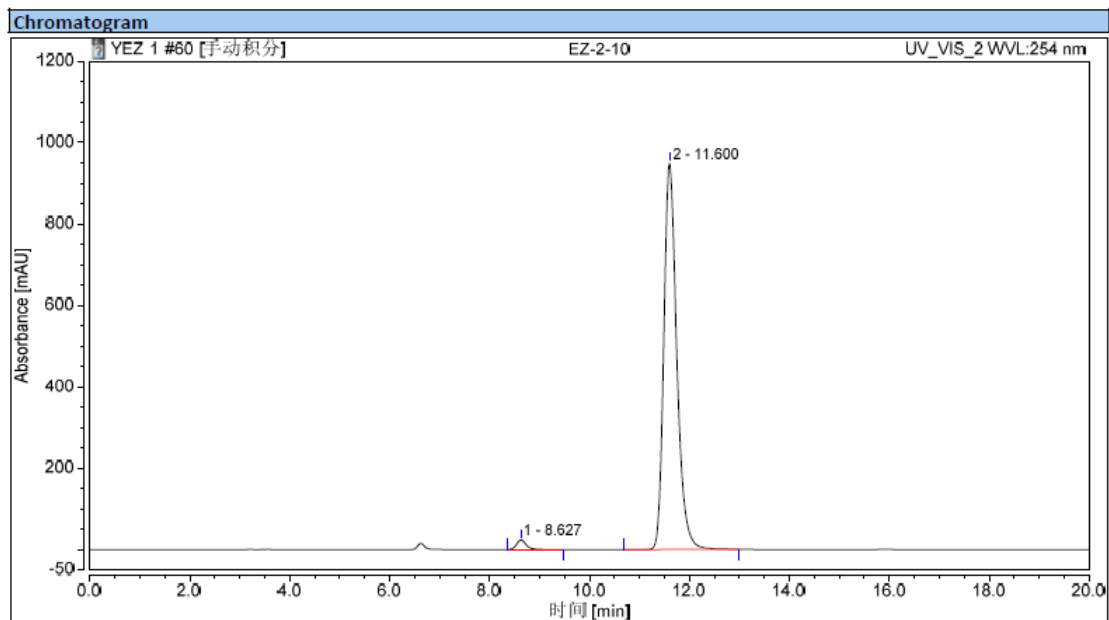

**Integration Results**

| No.    | Peak Name | Retention Time<br>min | Area<br>mAU*min | Height<br>mAU | Relative Area<br>% | Relative Height<br>% | Amount<br>n.a. |
|--------|-----------|-----------------------|-----------------|---------------|--------------------|----------------------|----------------|
| 1      |           | 8.627                 | 5.260           | 23.736        | 1.82               | 2.44                 | n.a.           |
| 2      |           | 11.600                | 283.603         | 948.826       | 98.18              | 97.56                | n.a.           |
| Total: |           |                       | 288.863         | 972.562       | 100.00             | 100.00               |                |

## Compound 30a

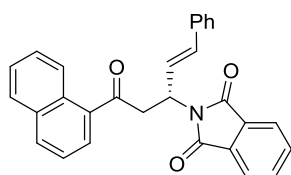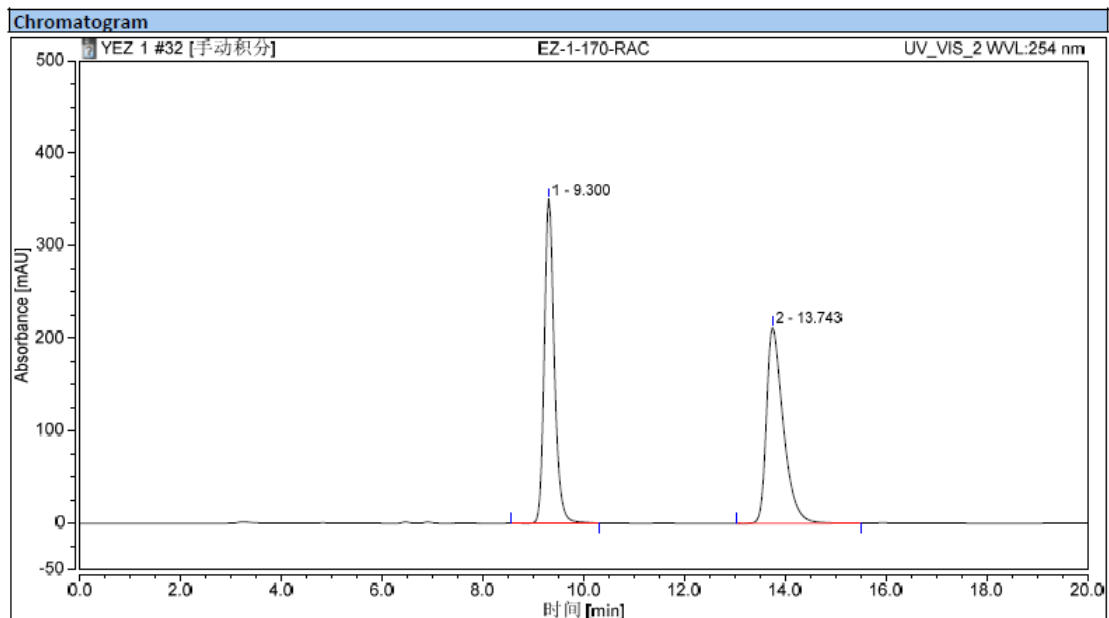

**Integration Results**

| No.           | Peak Name | Retention Time<br>min | Area<br>mAU*min | Height<br>mAU  | Relative Area<br>% | Relative Height<br>% | Amount<br>n.a. |
|---------------|-----------|-----------------------|-----------------|----------------|--------------------|----------------------|----------------|
| 1             |           | 9.300                 | 81.416          | 350.290        | 50.02              | 62.35                | n.a.           |
| 2             |           | 13.743                | 81.339          | 211.500        | 49.98              | 37.65                | n.a.           |
| <b>Total:</b> |           |                       | <b>162.754</b>  | <b>561.790</b> | <b>100.00</b>      | <b>100.00</b>        |                |

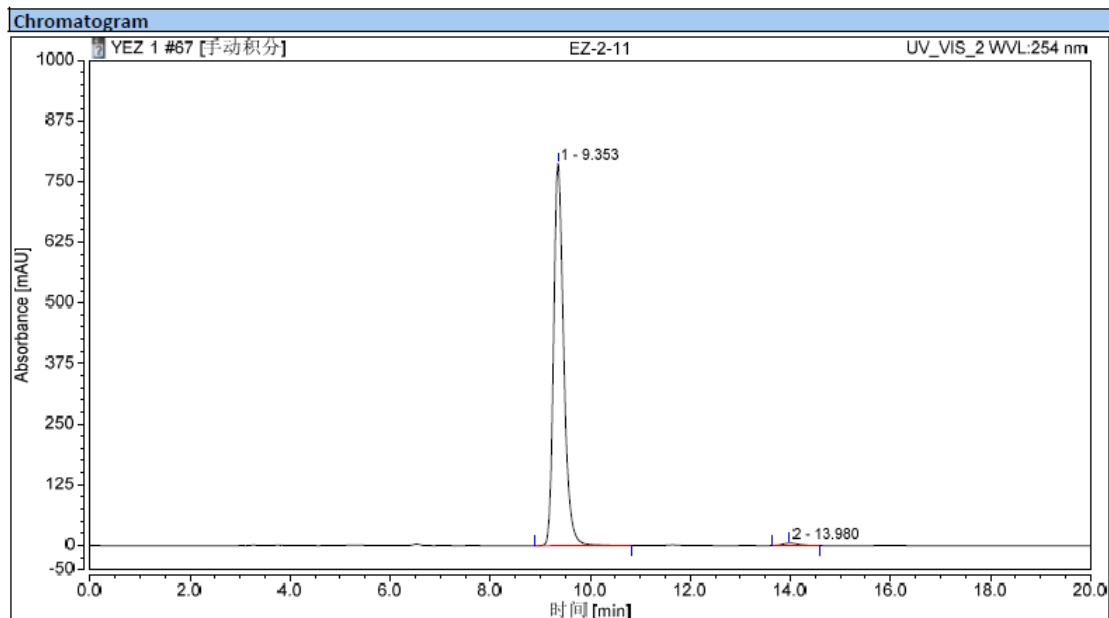

**Integration Results**

| No.           | Peak Name | Retention Time<br>min | Area<br>mAU*min | Height<br>mAU  | Relative Area<br>% | Relative Height<br>% | Amount<br>n.a. |
|---------------|-----------|-----------------------|-----------------|----------------|--------------------|----------------------|----------------|
| 1             |           | 9.353                 | 182.985         | 787.632        | 98.98              | 99.35                | n.a.           |
| 2             |           | 13.980                | 1.883           | 5.175          | 1.02               | 0.65                 | n.a.           |
| <b>Total:</b> |           |                       | <b>184.868</b>  | <b>792.807</b> | <b>100.00</b>      | <b>100.00</b>        |                |

## Compound 3pa

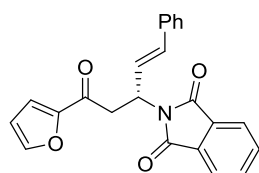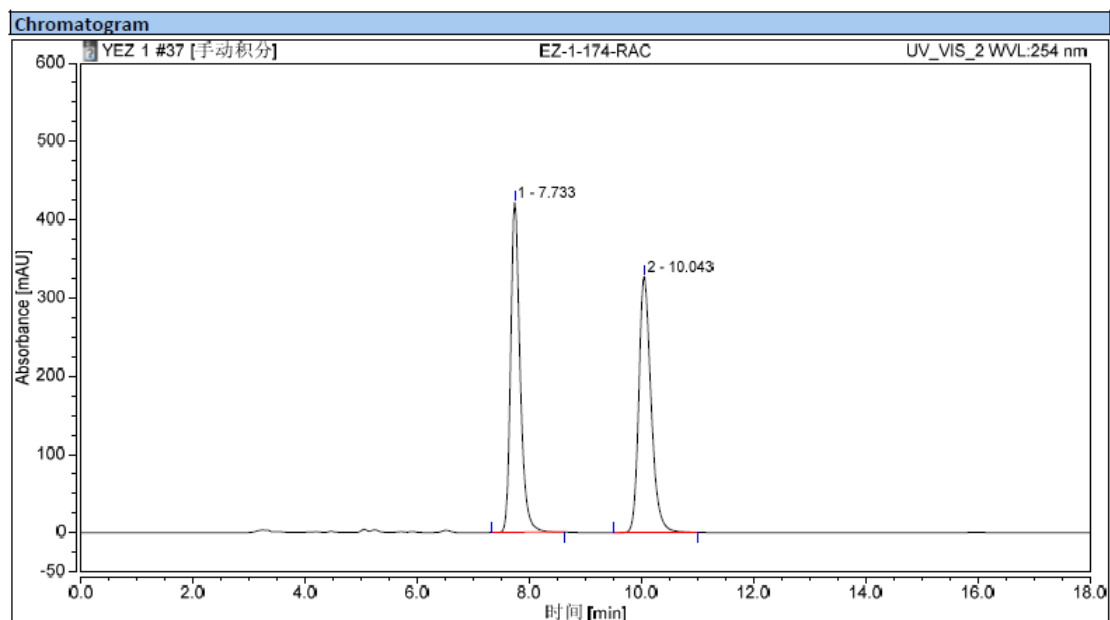

**Integration Results**

| No.           | Peak Name | Retention Time<br>min | Area<br>mAU*min | Height<br>mAU  | Relative Area<br>% | Relative Height<br>% | Amount<br>n.a. |
|---------------|-----------|-----------------------|-----------------|----------------|--------------------|----------------------|----------------|
| 1             |           | 7.733                 | 82.584          | 421.542        | 49.92              | 56.29                | n.a.           |
| 2             |           | 10.043                | 82.845          | 327.273        | 50.08              | 43.71                | n.a.           |
| <b>Total:</b> |           |                       | <b>165.429</b>  | <b>748.815</b> | <b>100.00</b>      | <b>100.00</b>        |                |

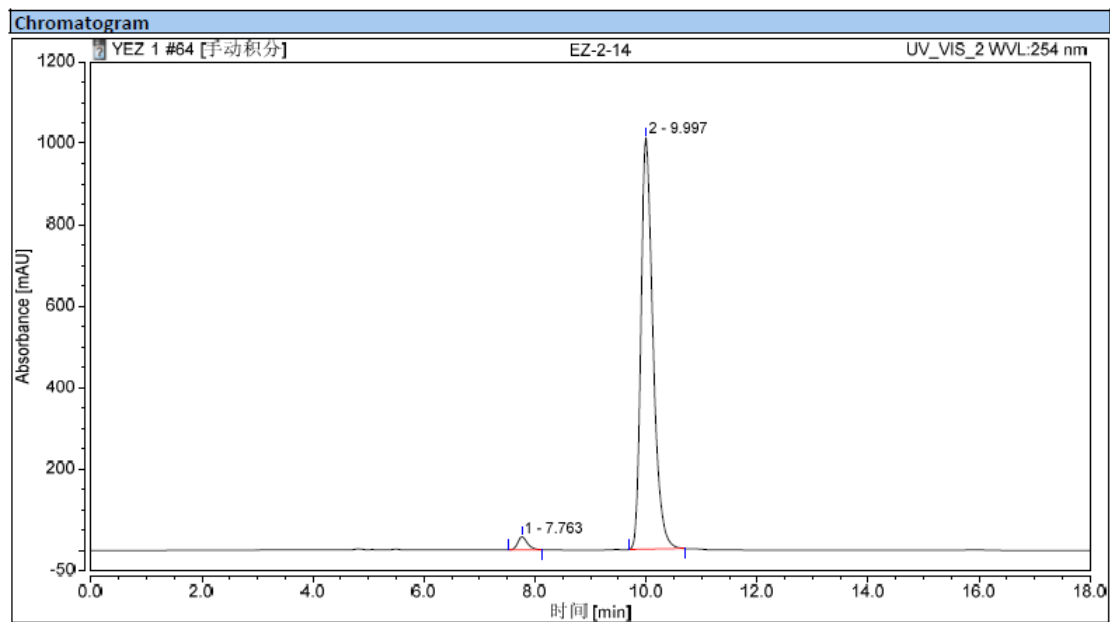

**Integration Results**

| No.           | Peak Name | Retention Time<br>min | Area<br>mAU*min | Height<br>mAU   | Relative Area<br>% | Relative Height<br>% | Amount<br>n.a. |
|---------------|-----------|-----------------------|-----------------|-----------------|--------------------|----------------------|----------------|
| 1             |           | 7.763                 | 6.515           | 32.171          | 2.51               | 3.09                 | n.a.           |
| 2             |           | 9.997                 | 252.765         | 1009.858        | 97.49              | 96.91                | n.a.           |
| <b>Total:</b> |           |                       | <b>259.280</b>  | <b>1042.029</b> | <b>100.00</b>      | <b>100.00</b>        |                |

## Compound 3qa

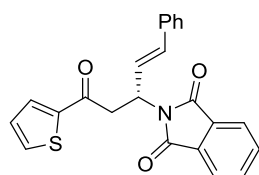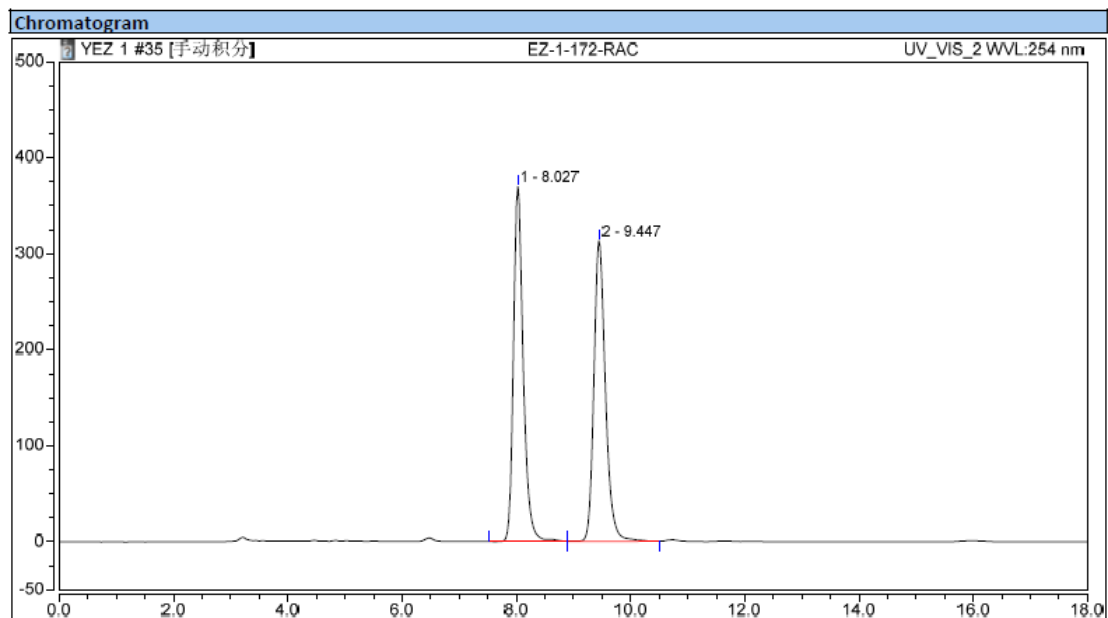

**Integration Results**

| No.           | Peak Name | Retention Time<br>min | Area<br>mAU*min | Height<br>mAU  | Relative Area<br>% | Relative Height<br>% | Amount<br>n.a. |
|---------------|-----------|-----------------------|-----------------|----------------|--------------------|----------------------|----------------|
| 1             |           | 8.027                 | 73.276          | 369.726        | 49.88              | 54.13                | n.a.           |
| 2             |           | 9.447                 | 73.625          | 313.252        | 50.12              | 45.87                | n.a.           |
| <b>Total:</b> |           |                       | <b>146.901</b>  | <b>682.978</b> | <b>100.00</b>      | <b>100.00</b>        |                |

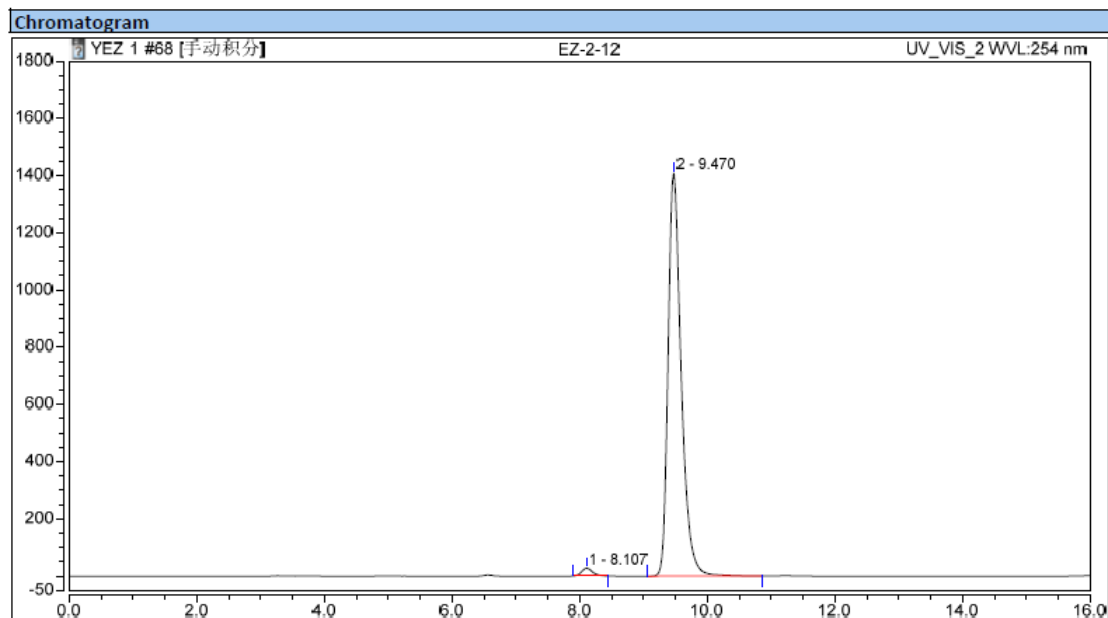

**Integration Results**

| No.           | Peak Name | Retention Time<br>min | Area<br>mAU*min | Height<br>mAU   | Relative Area<br>% | Relative Height<br>% | Amount<br>n.a. |
|---------------|-----------|-----------------------|-----------------|-----------------|--------------------|----------------------|----------------|
| 1             |           | 8.107                 | 5.351           | 27.115          | 1.58               | 1.89                 | n.a.           |
| 2             |           | 9.470                 | 333.501         | 1407.911        | 98.42              | 98.11                | n.a.           |
| <b>Total:</b> |           |                       | <b>338.851</b>  | <b>1435.025</b> | <b>100.00</b>      | <b>100.00</b>        |                |

## Compound 3ra

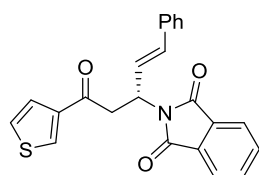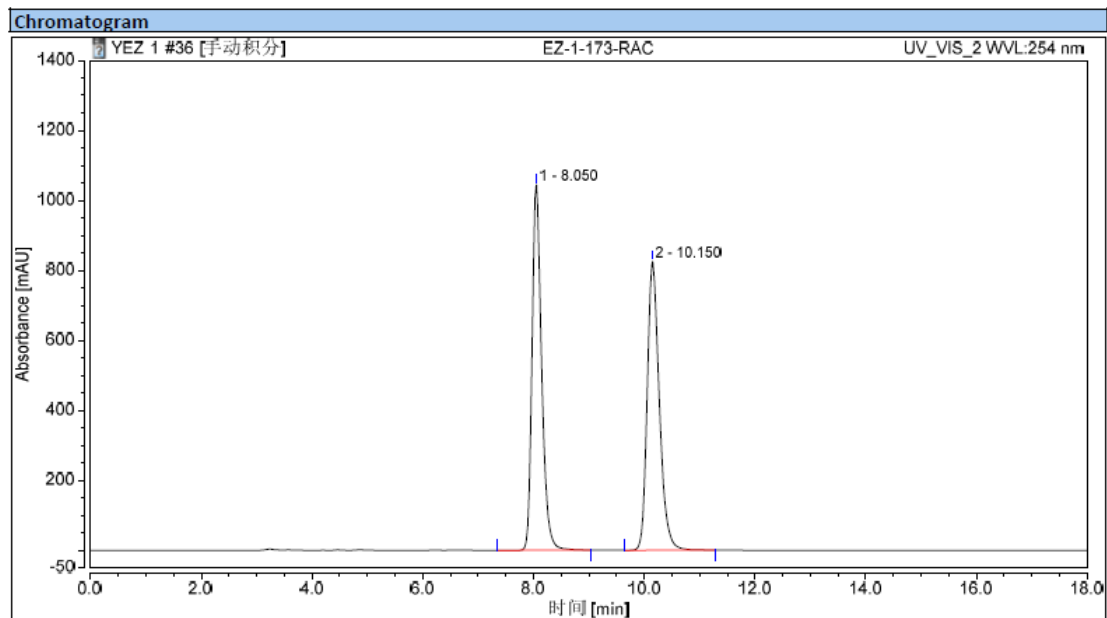

**Integration Results**

| No.           | Peak Name | Retention Time<br>min | Area<br>mAU*min | Height<br>mAU   | Relative Area<br>% | Relative Height<br>% | Amount<br>n.a. |
|---------------|-----------|-----------------------|-----------------|-----------------|--------------------|----------------------|----------------|
| 1             |           | 8.050                 | 208.448         | 1043.847        | 49.98              | 55.86                | n.a.           |
| 2             |           | 10.150                | 208.625         | 824.739         | 50.02              | 44.14                | n.a.           |
| <b>Total:</b> |           |                       | <b>417.073</b>  | <b>1868.586</b> | <b>100.00</b>      | <b>100.00</b>        |                |

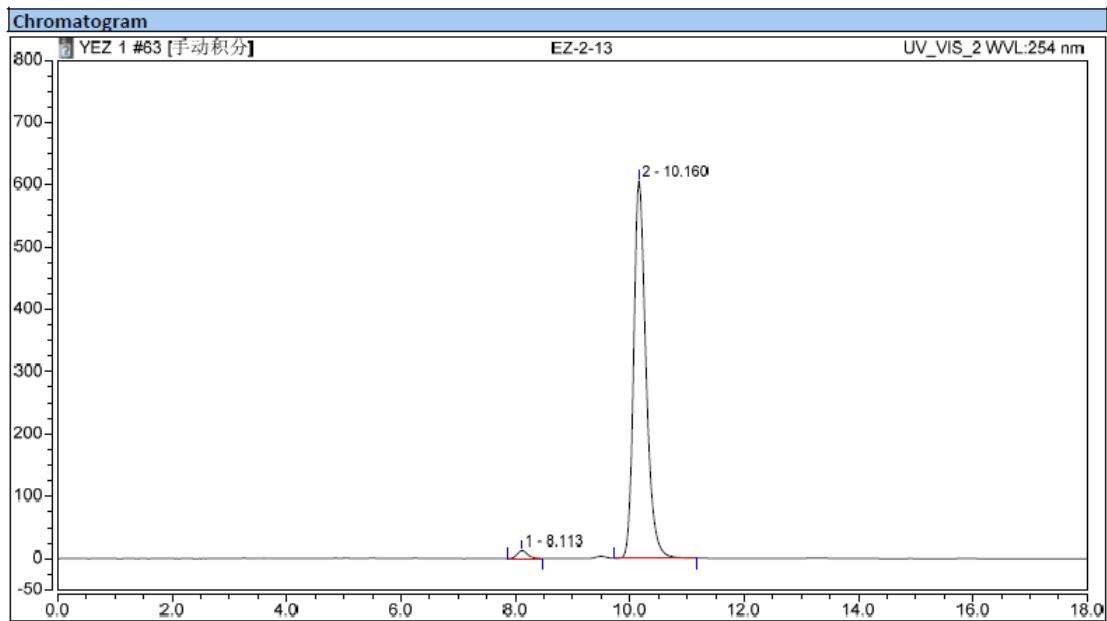

**Integration Results**

| No.           | Peak Name | Retention Time<br>min | Area<br>mAU*min | Height<br>mAU  | Relative Area<br>% | Relative Height<br>% | Amount<br>n.a. |
|---------------|-----------|-----------------------|-----------------|----------------|--------------------|----------------------|----------------|
| 1             |           | 8.113                 | 2.560           | 12.900         | 1.66               | 2.08                 | n.a.           |
| 2             |           | 10.160                | 151.292         | 605.891        | 98.34              | 97.92                | n.a.           |
| <b>Total:</b> |           |                       | <b>153.853</b>  | <b>618.791</b> | <b>100.00</b>      | <b>100.00</b>        |                |

## Compound 3sa

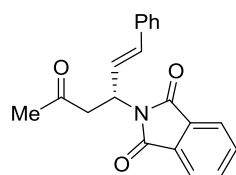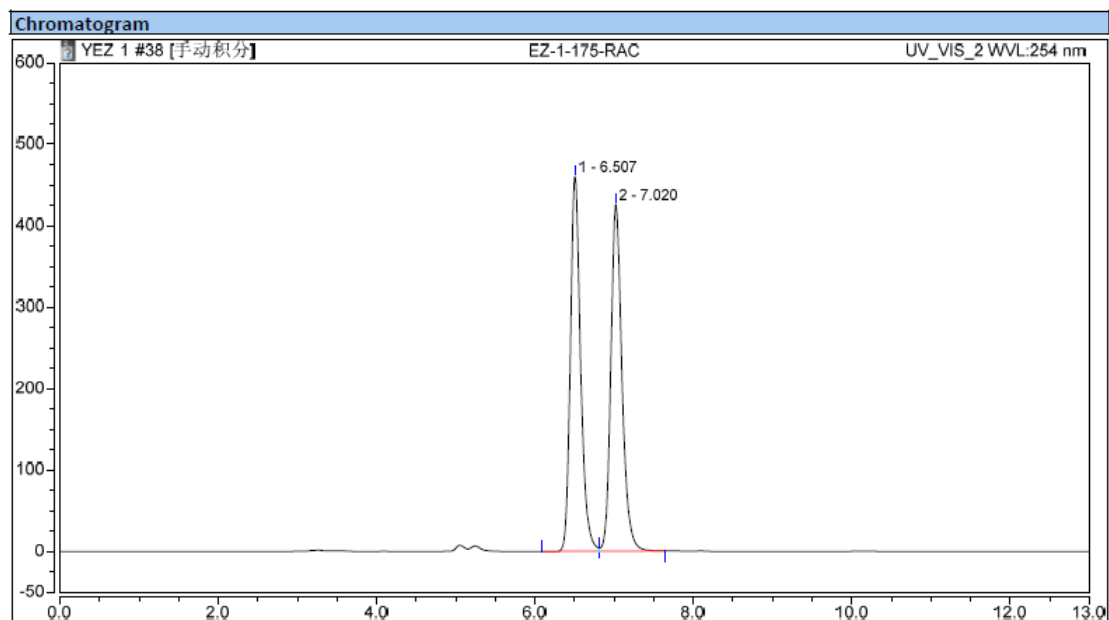

| No.           | Peak Name | Retention Time<br>min | Area<br>mAU*min | Height<br>mAU  | Relative Area<br>% | Relative Height<br>% | Amount<br>n.a. |
|---------------|-----------|-----------------------|-----------------|----------------|--------------------|----------------------|----------------|
| 1             |           | 6.507                 | 68.775          | 460.394        | 49.77              | 51.95                | n.a.           |
| 2             |           | 7.020                 | 69.412          | 425.770        | 50.23              | 48.05                | n.a.           |
| <b>Total:</b> |           |                       | <b>138.187</b>  | <b>886.164</b> | <b>100.00</b>      | <b>100.00</b>        |                |

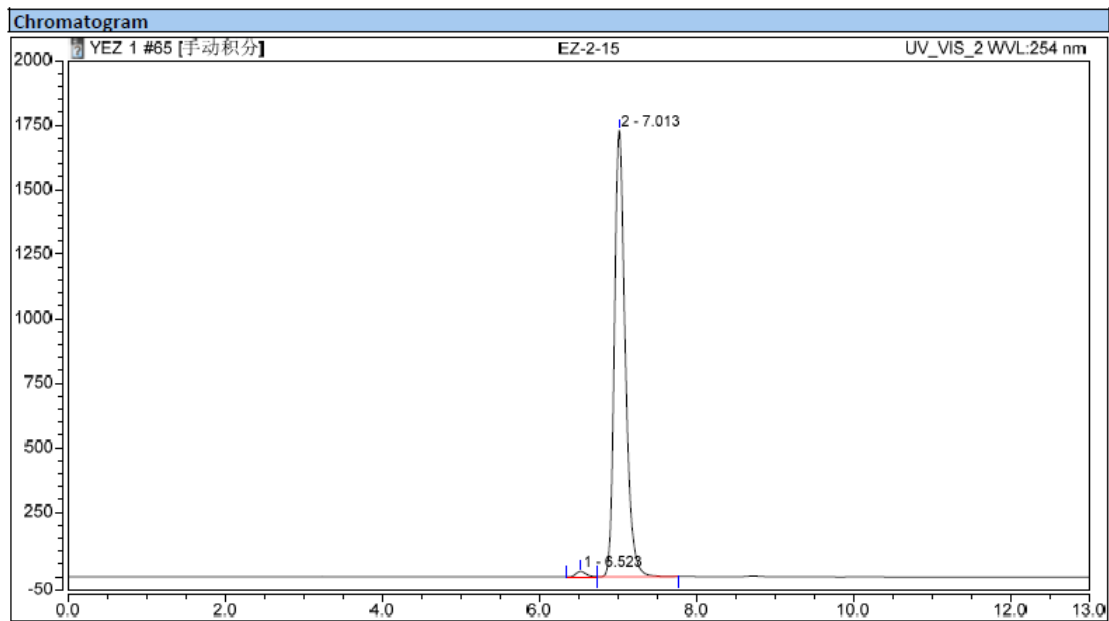

| No.           | Peak Name | Retention Time<br>min | Area<br>mAU*min | Height<br>mAU   | Relative Area<br>% | Relative Height<br>% | Amount<br>n.a. |
|---------------|-----------|-----------------------|-----------------|-----------------|--------------------|----------------------|----------------|
| 1             |           | 6.523                 | 3.178           | 21.541          | 1.13               | 1.23                 | n.a.           |
| 2             |           | 7.013                 | 277.606         | 1729.628        | 98.87              | 98.77                | n.a.           |
| <b>Total:</b> |           |                       | <b>280.783</b>  | <b>1751.169</b> | <b>100.00</b>      | <b>100.00</b>        |                |

# Compound 3ta

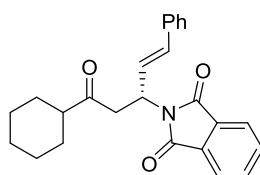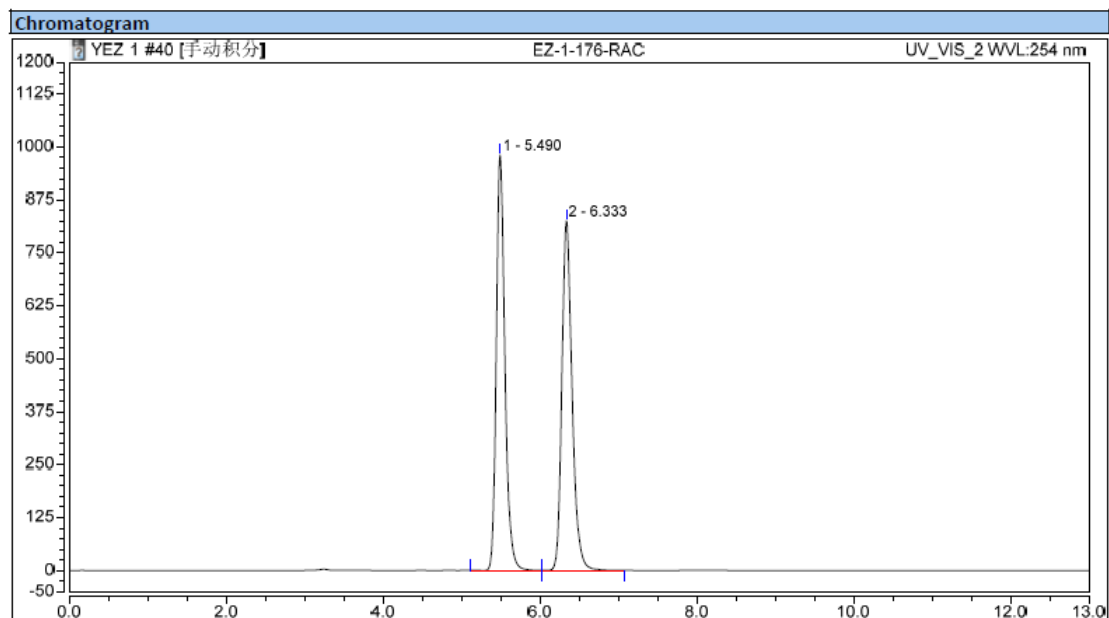

**Integration Results**

| No.           | Peak Name | Retention Time<br>min | Area<br>mAU*min | Height<br>mAU   | Relative Area<br>% | Relative Height<br>% | Amount<br>n.a. |
|---------------|-----------|-----------------------|-----------------|-----------------|--------------------|----------------------|----------------|
| 1             |           | 5.490                 | 124.162         | 980.770         | 49.97              | 54.31                | n.a.           |
| 2             |           | 6.333                 | 124.323         | 825.074         | 50.03              | 45.69                | n.a.           |
| <b>Total:</b> |           |                       | <b>248.485</b>  | <b>1805.844</b> | <b>100.00</b>      | <b>100.00</b>        |                |

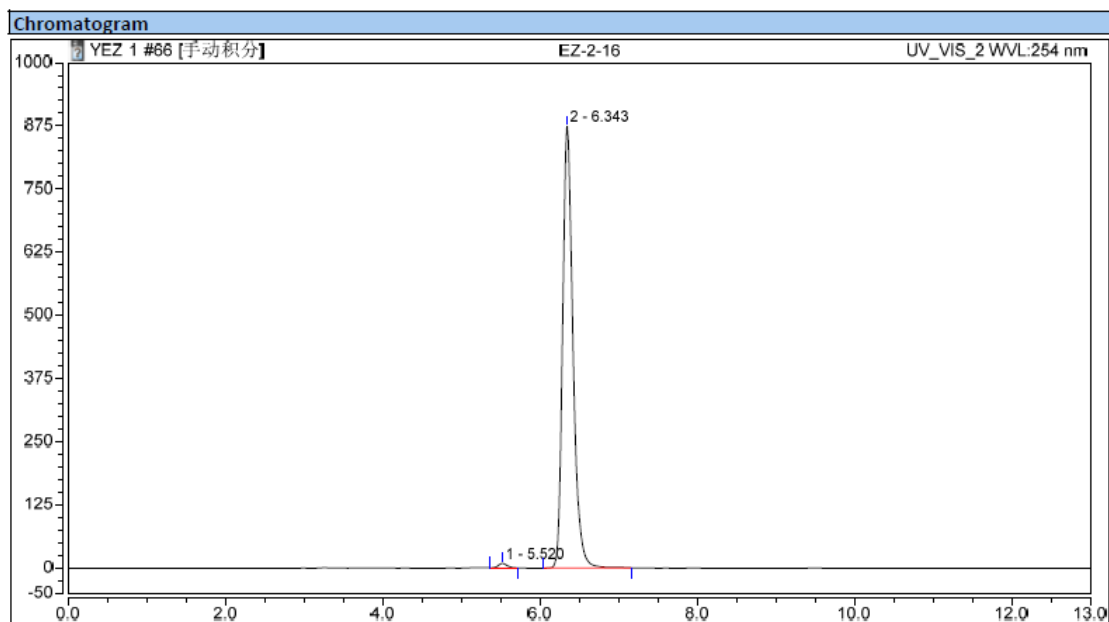

**Integration Results**

| No.           | Peak Name | Retention Time<br>min | Area<br>mAU*min | Height<br>mAU  | Relative Area<br>% | Relative Height<br>% | Amount<br>n.a. |
|---------------|-----------|-----------------------|-----------------|----------------|--------------------|----------------------|----------------|
| 1             |           | 5.520                 | 1.081           | 8.771          | 0.81               | 0.99                 | n.a.           |
| 2             |           | 6.343                 | 133.147         | 873.634        | 99.19              | 99.01                | n.a.           |
| <b>Total:</b> |           |                       | <b>134.227</b>  | <b>882.405</b> | <b>100.00</b>      | <b>100.00</b>        |                |

# Compound 3ua

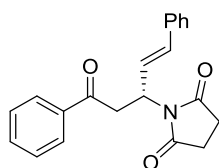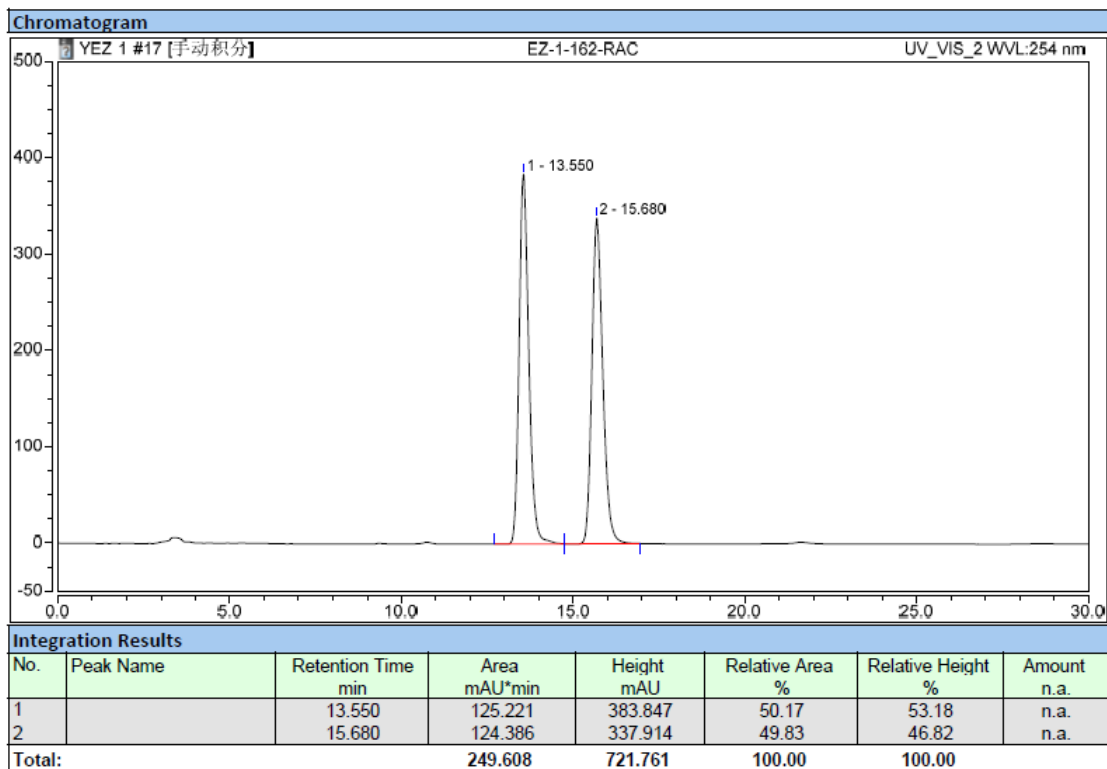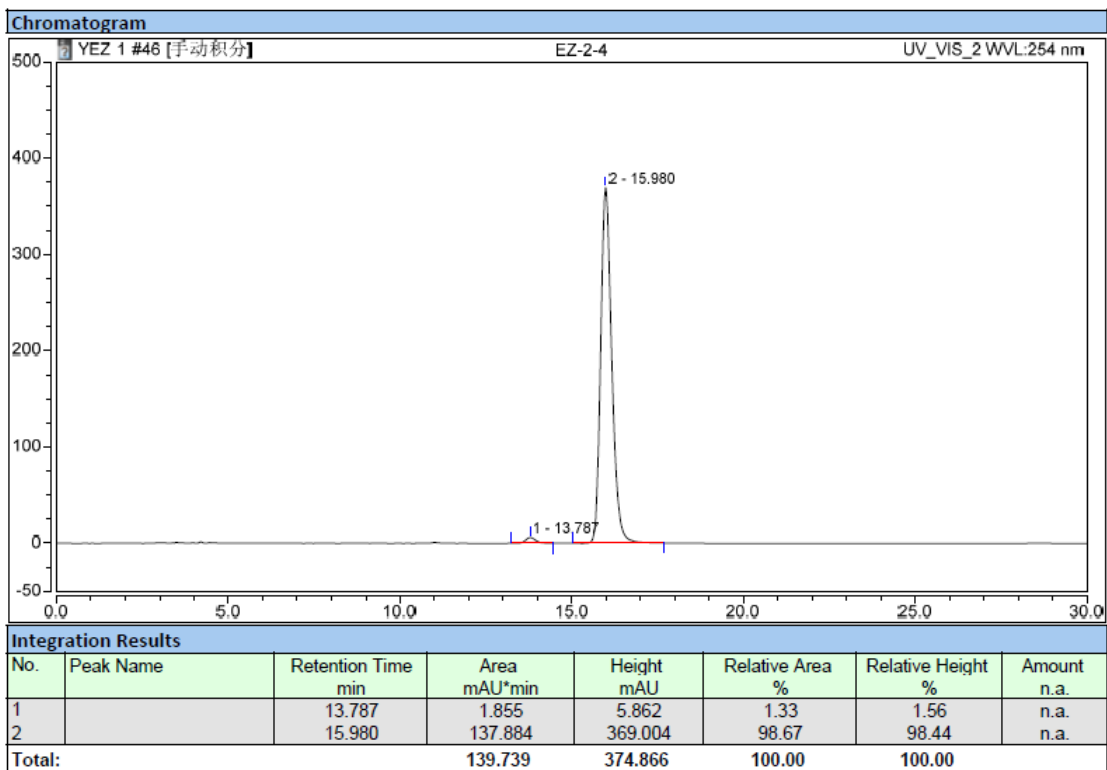



# Compound 3ab

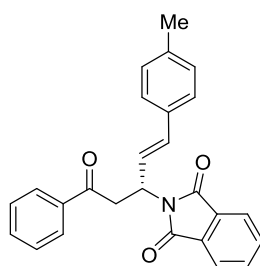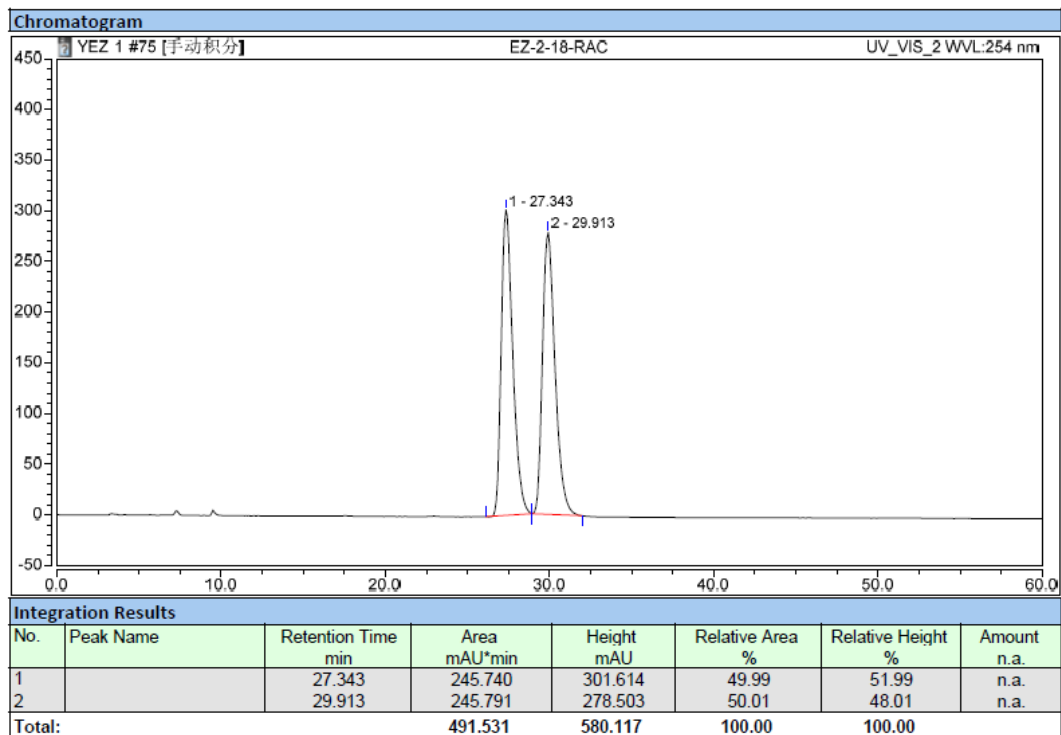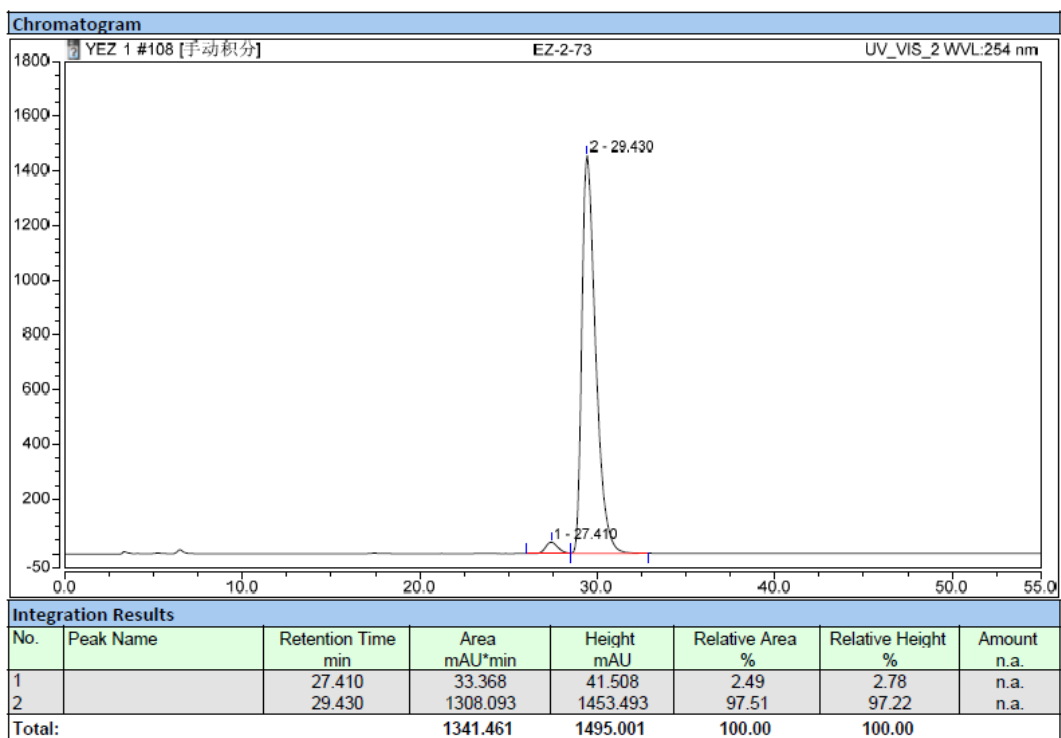

# Compound 3ac

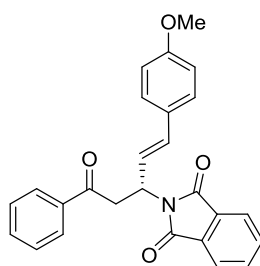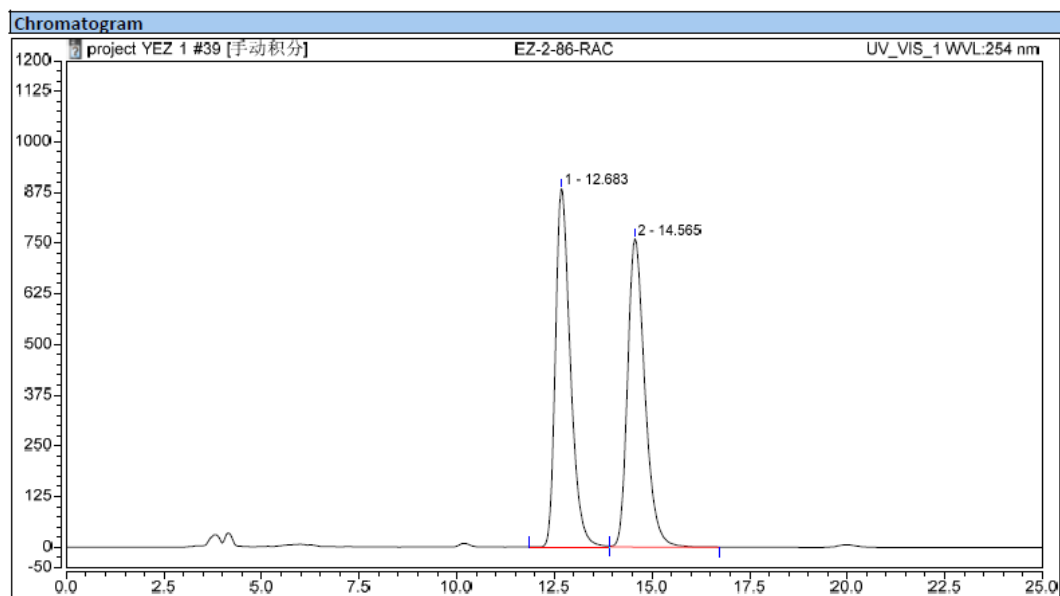

**Integration Results**

| No.           | Peak Name | Retention Time<br>min | Area<br>mAU*min | Height<br>mAU   | Relative Area<br>% | Relative Height<br>% | Amount<br>n.a. |
|---------------|-----------|-----------------------|-----------------|-----------------|--------------------|----------------------|----------------|
| 1             |           | 12.683                | 392.596         | 884.149         | 50.09              | 53.75                | n.a.           |
| 2             |           | 14.565                | 391.190         | 760.829         | 49.91              | 46.25                | n.a.           |
| <b>Total:</b> |           |                       | <b>783.786</b>  | <b>1644.978</b> | <b>100.00</b>      | <b>100.00</b>        |                |

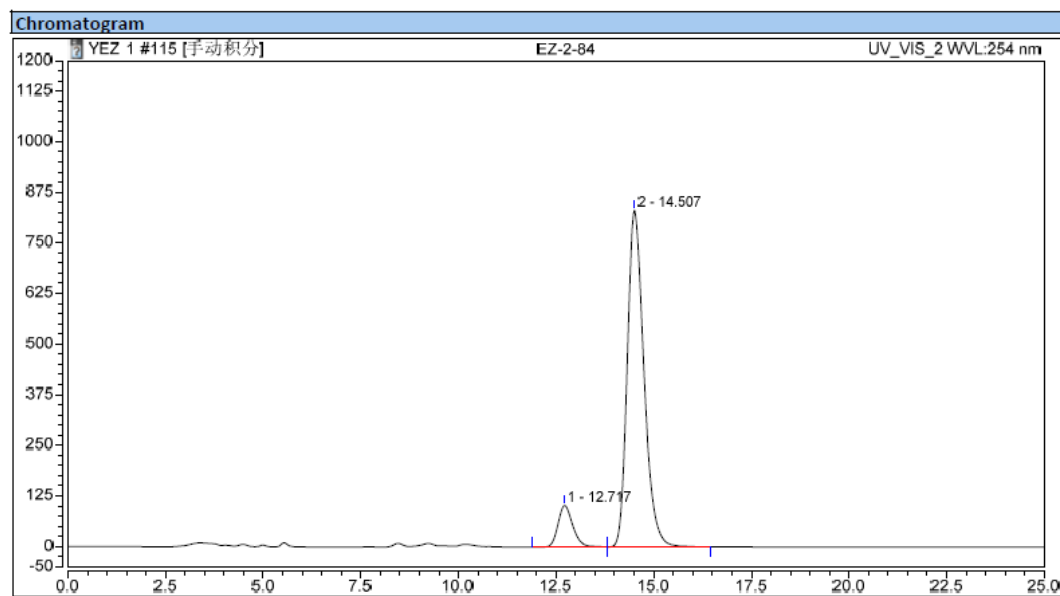

**Integration Results**

| No.           | Peak Name | Retention Time<br>min | Area<br>mAU*min | Height<br>mAU  | Relative Area<br>% | Relative Height<br>% | Amount<br>n.a. |
|---------------|-----------|-----------------------|-----------------|----------------|--------------------|----------------------|----------------|
| 1             |           | 12.717                | 45.043          | 103.291        | 9.88               | 11.05                | n.a.           |
| 2             |           | 14.507                | 410.924         | 831.306        | 90.12              | 88.95                | n.a.           |
| <b>Total:</b> |           |                       | <b>455.967</b>  | <b>934.597</b> | <b>100.00</b>      | <b>100.00</b>        |                |

## Compound 3ad

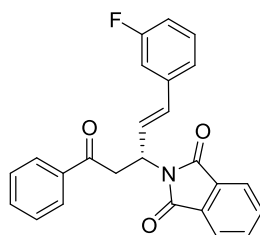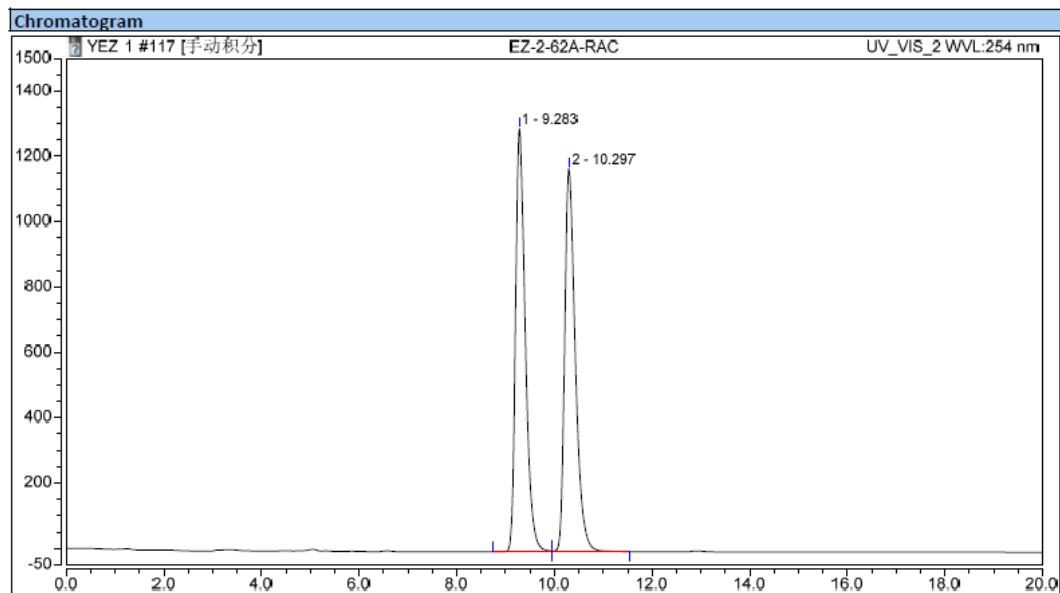

**Integration Results**

| No.           | Peak Name | Retention Time min | Area mAU*min | Height mAU | Relative Area % | Relative Height % | Amount |
|---------------|-----------|--------------------|--------------|------------|-----------------|-------------------|--------|
| 1             |           | 9.283              | 298.030      | 1295.934   | 50.03           | 52.46             | n.a.   |
| 2             |           | 10.297             | 297.646      | 1174.310   | 49.97           | 47.54             | n.a.   |
| <b>Total:</b> |           |                    | 595.676      | 2470.244   | 100.00          | 100.00            |        |

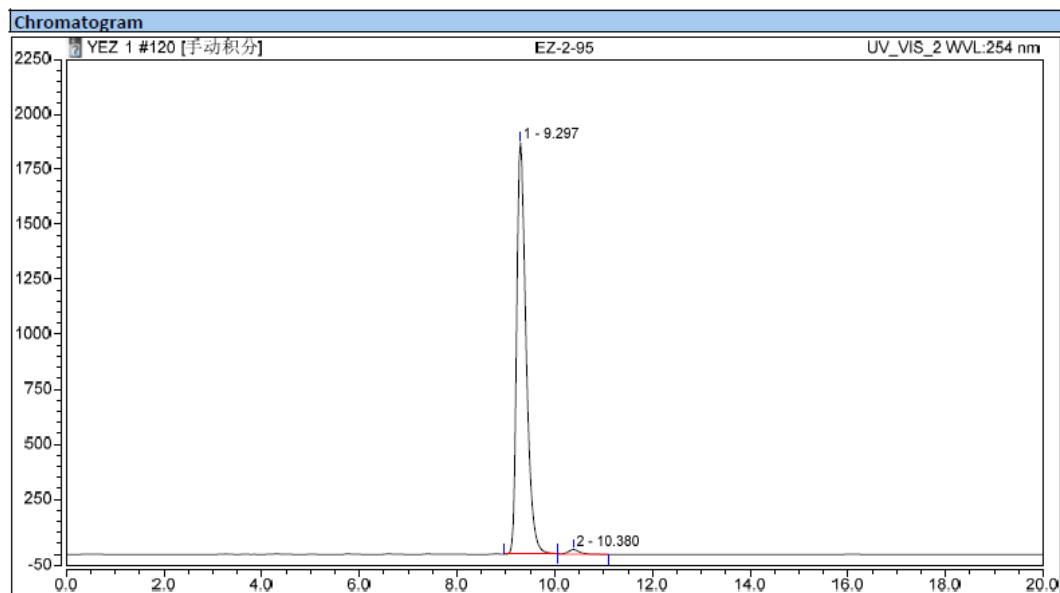

**Integration Results**

| No.           | Peak Name | Retention Time min | Area mAU*min | Height mAU | Relative Area % | Relative Height % | Amount |
|---------------|-----------|--------------------|--------------|------------|-----------------|-------------------|--------|
| 1             |           | 9.297              | 416.546      | 1871.591   | 98.60           | 98.86             | n.a.   |
| 2             |           | 10.380             | 5.894        | 21.542     | 1.40            | 1.14              | n.a.   |
| <b>Total:</b> |           |                    | 422.440      | 1893.134   | 100.00          | 100.00            |        |

# Compound 3ae

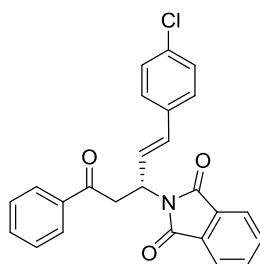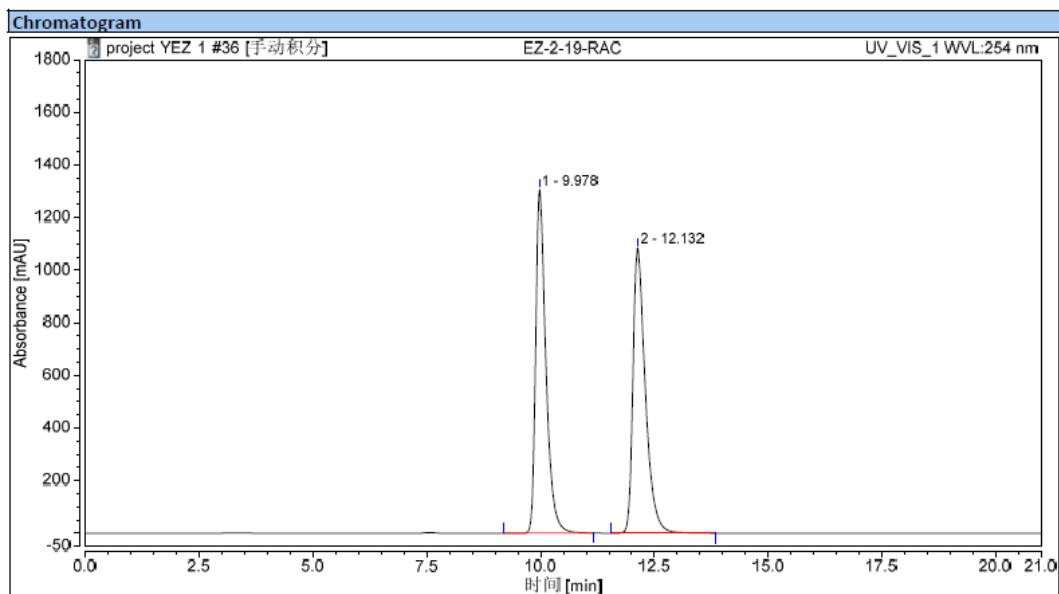

**Integration Results**

| No.    | Peak Name | Retention Time<br>min | Area<br>mAU*min | Height<br>mAU | Relative Area<br>% | Relative Height<br>% | Amount<br>n.a. |
|--------|-----------|-----------------------|-----------------|---------------|--------------------|----------------------|----------------|
| 1      |           | 9.978                 | 340.111         | 1306.697      | 49.90              | 54.65                | n.a.           |
| 2      |           | 12.132                | 341.542         | 1084.183      | 50.10              | 45.35                | n.a.           |
| Total: |           |                       | 681.653         | 2390.880      | 100.00             | 100.00               |                |

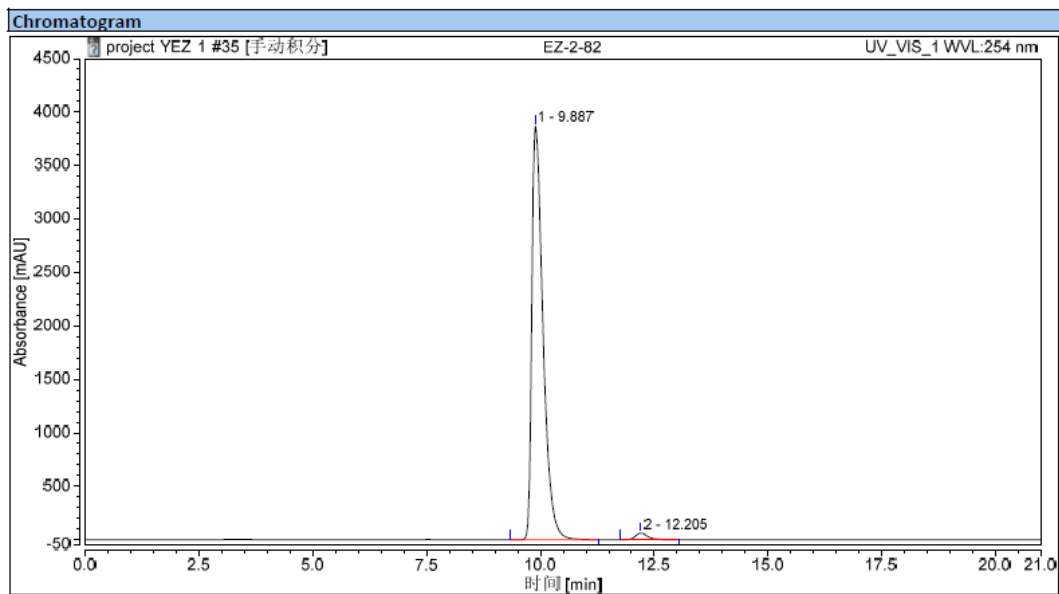

**Integration Results**

| No.    | Peak Name | Retention Time<br>min | Area<br>mAU*min | Height<br>mAU | Relative Area<br>% | Relative Height<br>% | Amount<br>n.a. |
|--------|-----------|-----------------------|-----------------|---------------|--------------------|----------------------|----------------|
| 1      |           | 9.887                 | 1107.237        | 3870.347      | 98.34              | 98.41                | n.a.           |
| 2      |           | 12.205                | 18.732          | 62.644        | 1.66               | 1.59                 | n.a.           |
| Total: |           |                       | 1125.969        | 3932.991      | 100.00             | 100.00               |                |

# Compound 3af

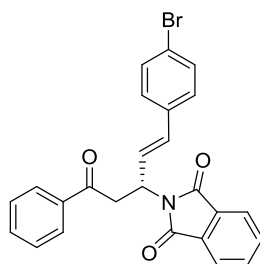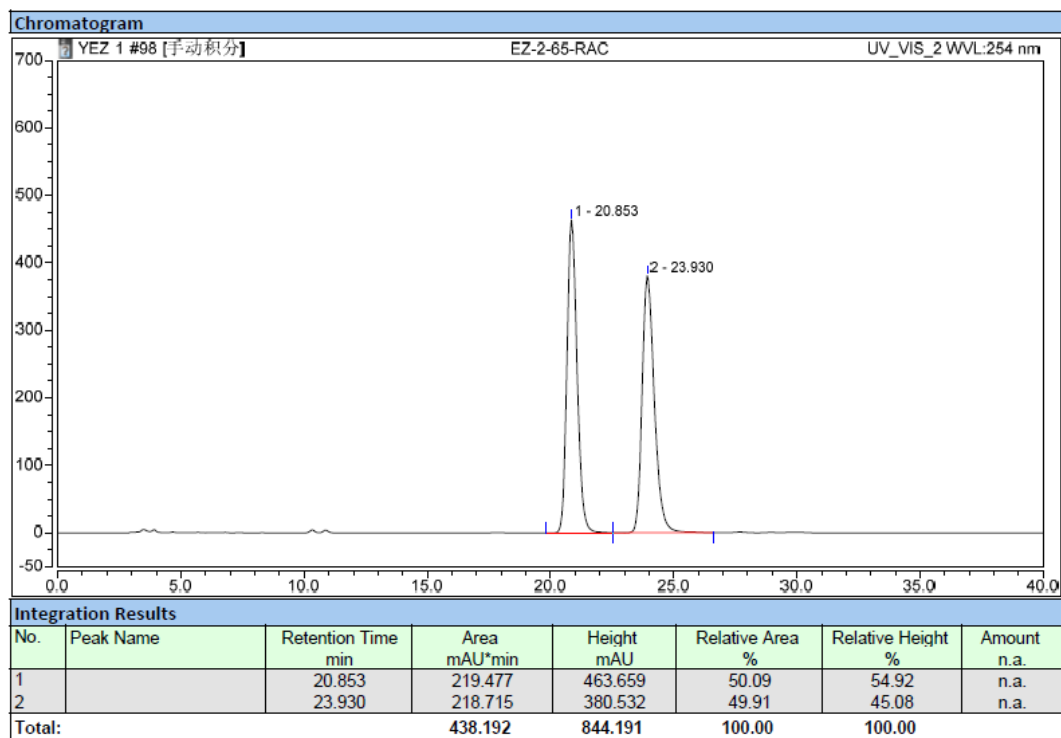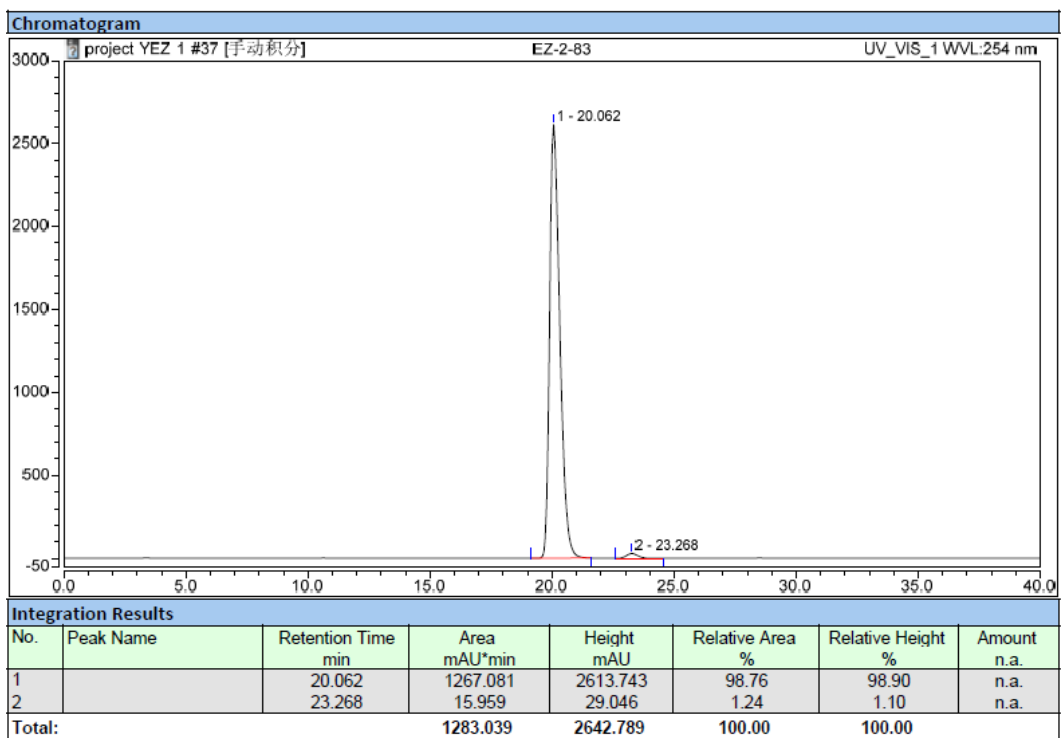

# Compound 3ag

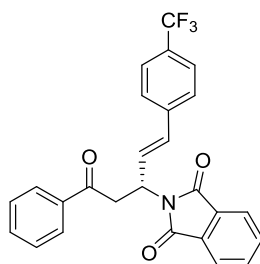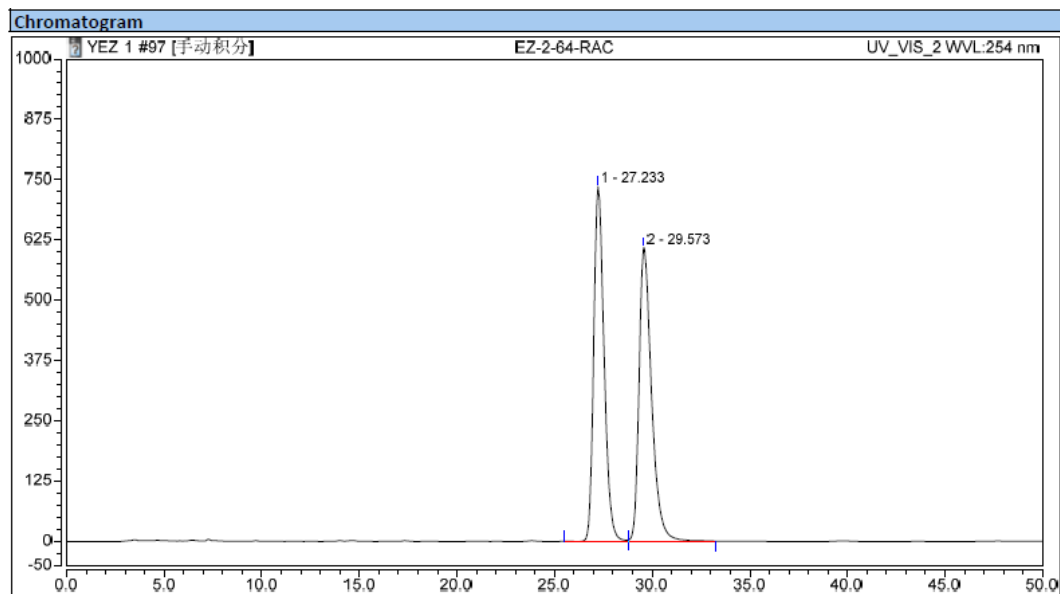

**Integration Results**

| No.           | Peak Name | Retention Time min | Area mAU*min   | Height mAU      | Relative Area % | Relative Height % | Amount n.a. |
|---------------|-----------|--------------------|----------------|-----------------|-----------------|-------------------|-------------|
| 1             |           | 27.233             | 450.012        | 735.458         | 49.92           | 54.71             | n.a.        |
| 2             |           | 29.573             | 451.493        | 608.921         | 50.08           | 45.29             | n.a.        |
| <b>Total:</b> |           |                    | <b>901.504</b> | <b>1344.379</b> | <b>100.00</b>   | <b>100.00</b>     |             |

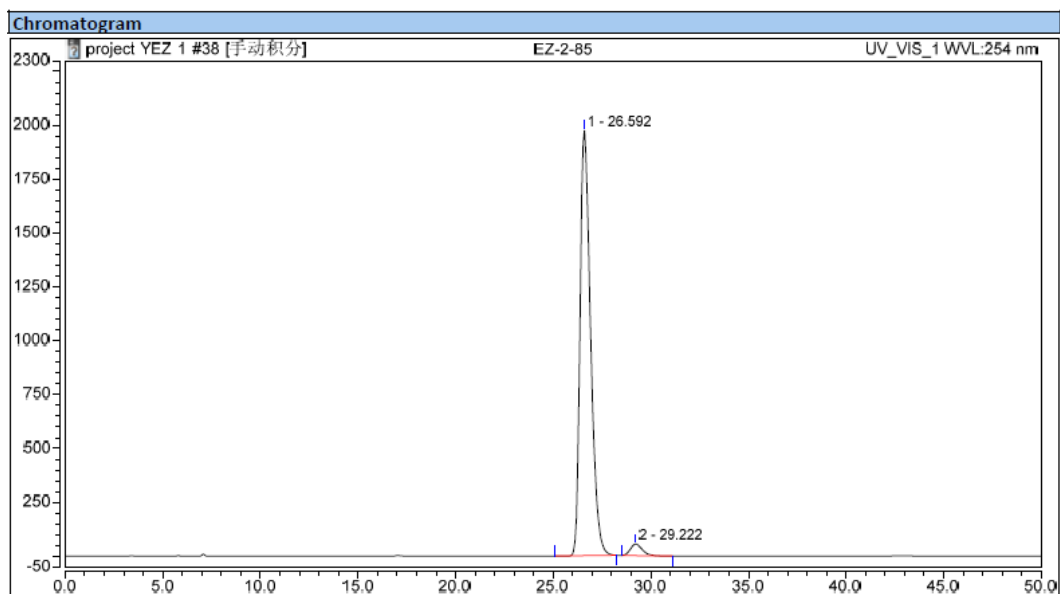

**Integration Results**

| No.           | Peak Name | Retention Time min | Area mAU*min    | Height mAU      | Relative Area % | Relative Height % | Amount n.a. |
|---------------|-----------|--------------------|-----------------|-----------------|-----------------|-------------------|-------------|
| 1             |           | 26.592             | 1228.539        | 1972.241        | 97.01           | 97.34             | n.a.        |
| 2             |           | 29.222             | 37.853          | 53.875          | 2.99            | 2.66              | n.a.        |
| <b>Total:</b> |           |                    | <b>1266.392</b> | <b>2026.116</b> | <b>100.00</b>   | <b>100.00</b>     |             |

## Compound 3ah

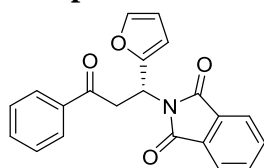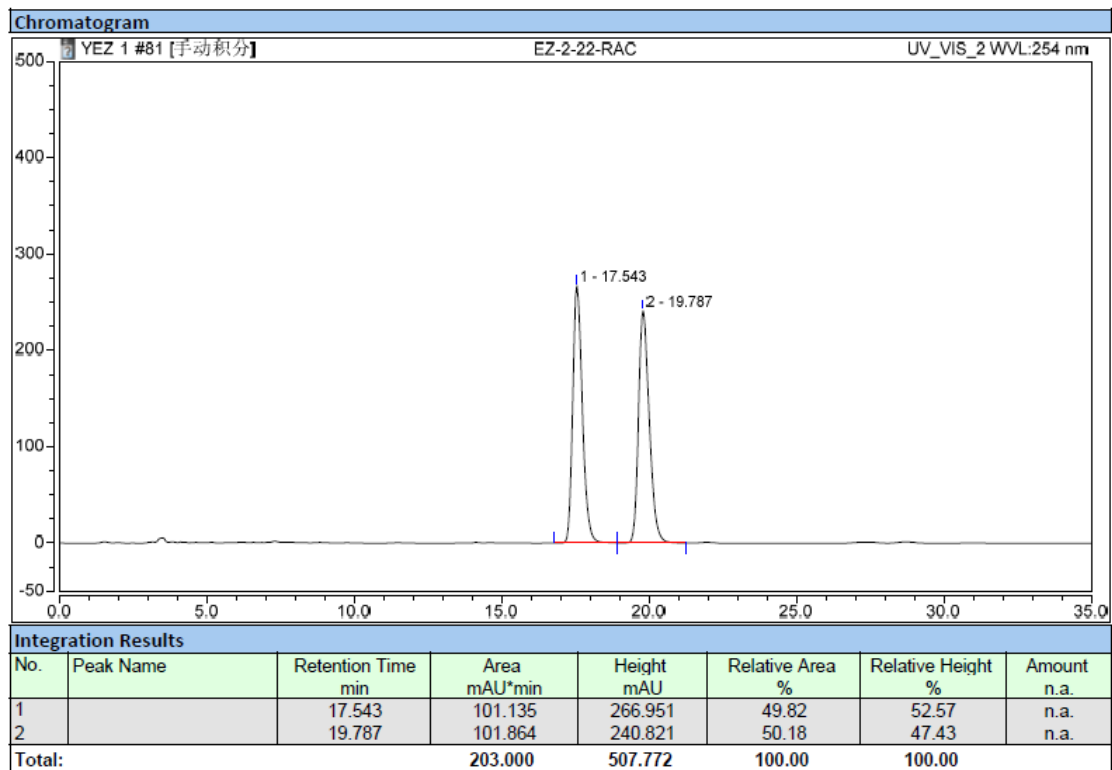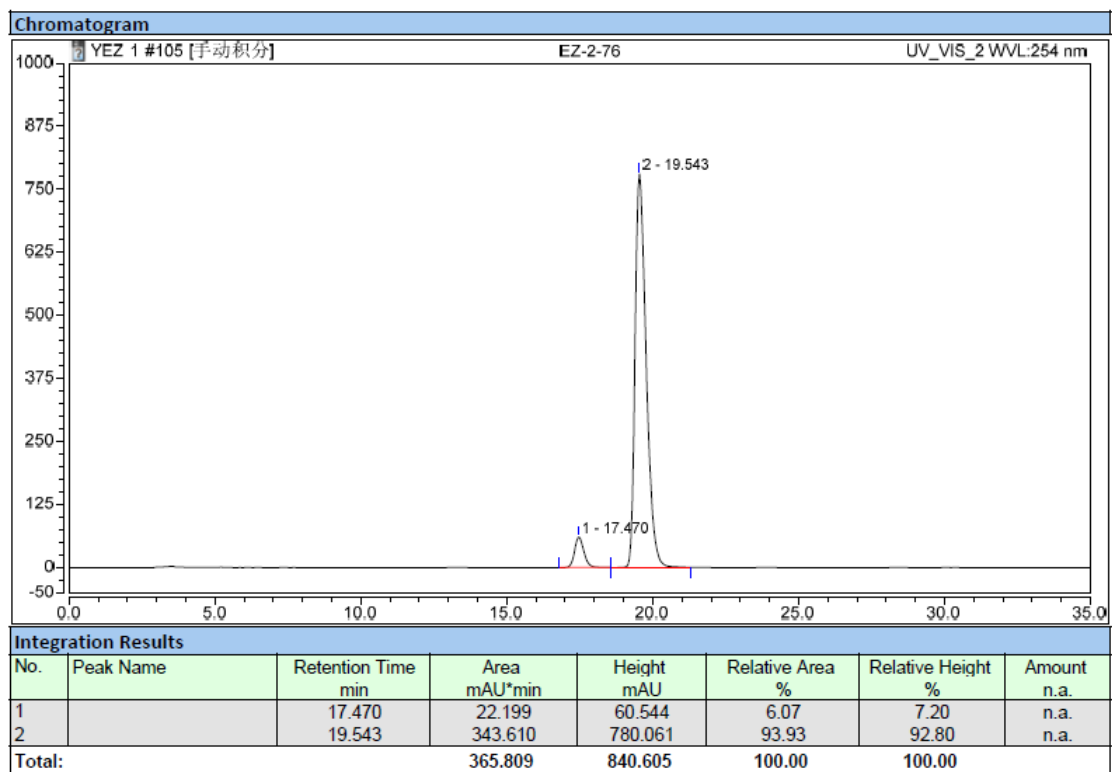

## Compound 3ai

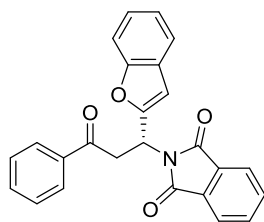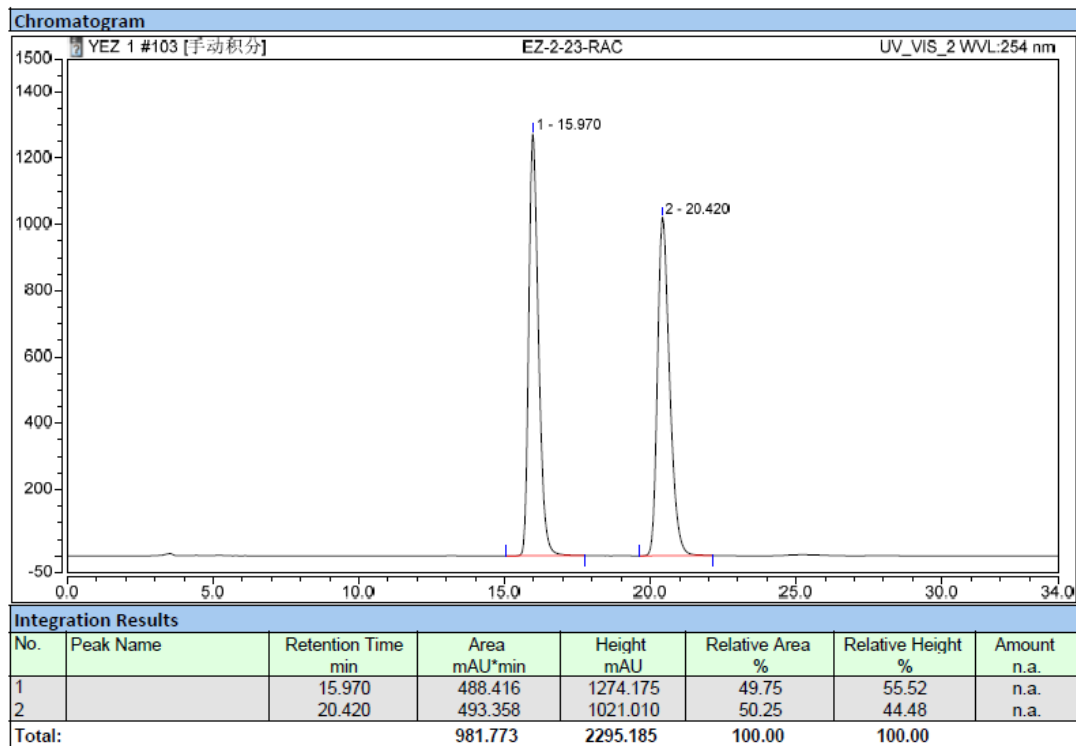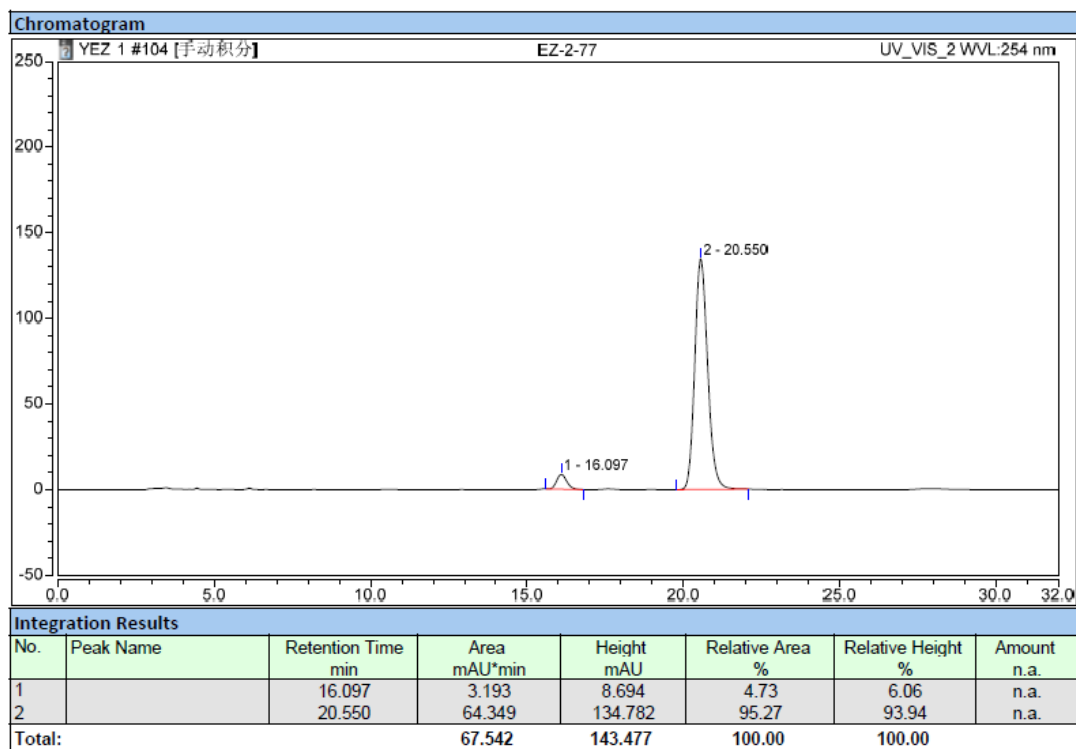



# Compound 3aj

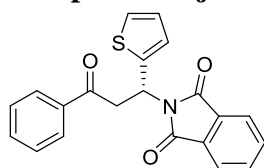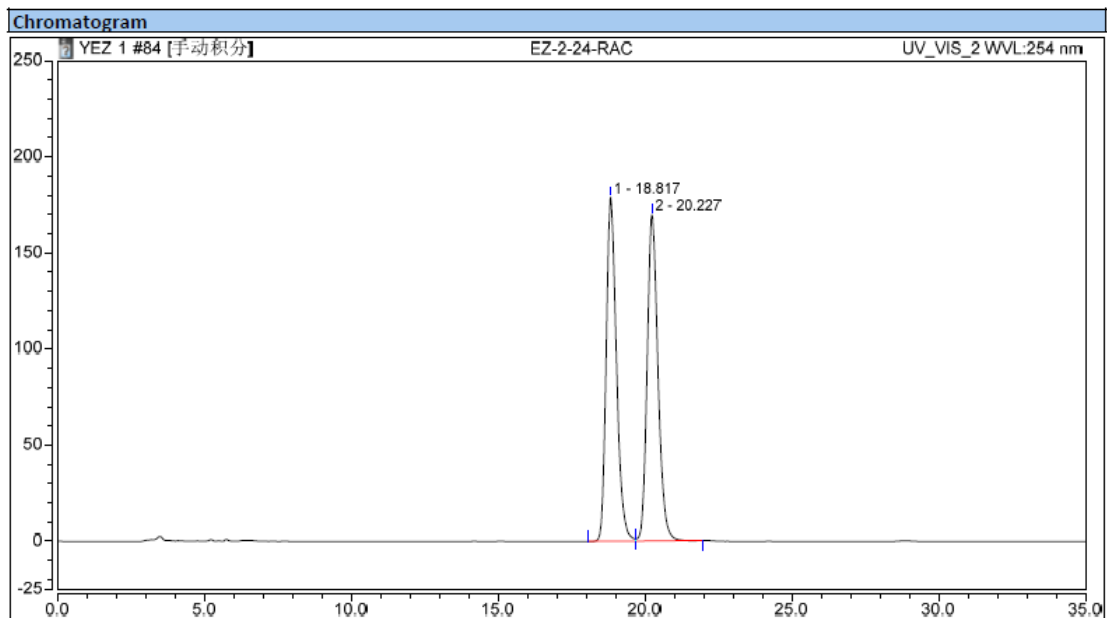

**Integration Results**

| No.           | Peak Name | Retention Time min | Area mAU*min   | Height mAU     | Relative Area % | Relative Height % | Amount |
|---------------|-----------|--------------------|----------------|----------------|-----------------|-------------------|--------|
| 1             |           | 18.817             | 72.199         | 178.936        | 49.95           | 51.33             | n.a.   |
| 2             |           | 20.227             | 72.339         | 169.654        | 50.05           | 48.67             | n.a.   |
| <b>Total:</b> |           |                    | <b>144.539</b> | <b>348.590</b> | <b>100.00</b>   | <b>100.00</b>     |        |

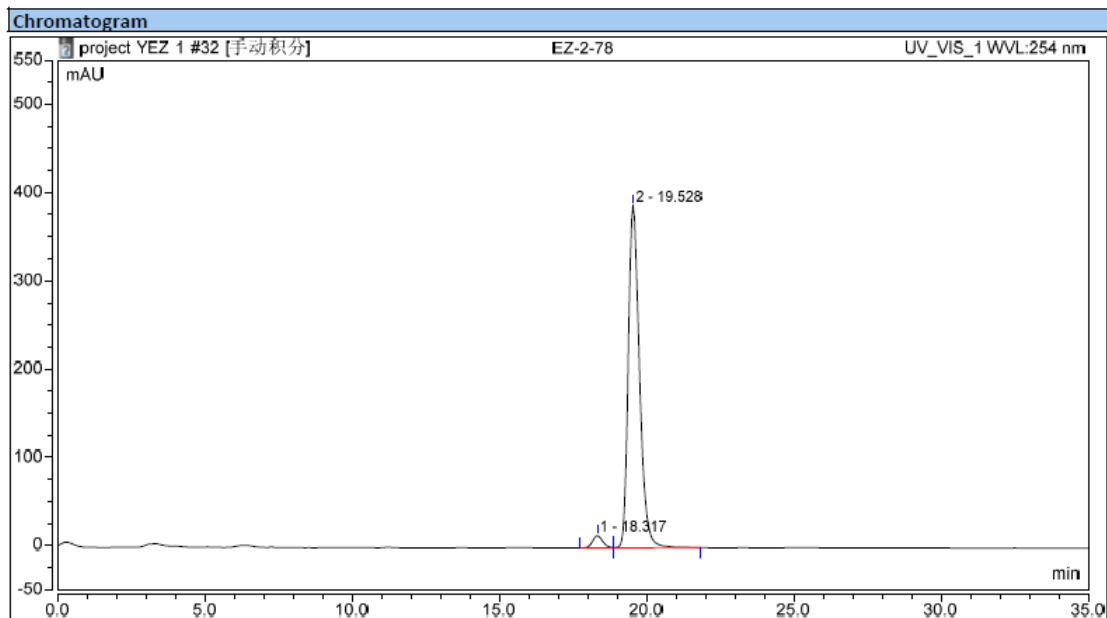

**Integration Results**

| No.           | Peak Name | Retention Time min | Area mAU*min   | Height mAU     | Relative Area % | Relative Height % | Amount |
|---------------|-----------|--------------------|----------------|----------------|-----------------|-------------------|--------|
| 1             |           | 18.317             | 5.507          | 13.813         | 3.12            | 3.44              | n.a.   |
| 2             |           | 19.528             | 171.228        | 388.144        | 96.88           | 96.56             | n.a.   |
| <b>Total:</b> |           |                    | <b>176.735</b> | <b>401.957</b> | <b>100.00</b>   | <b>100.00</b>     |        |

# Compound 3ak

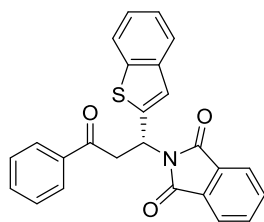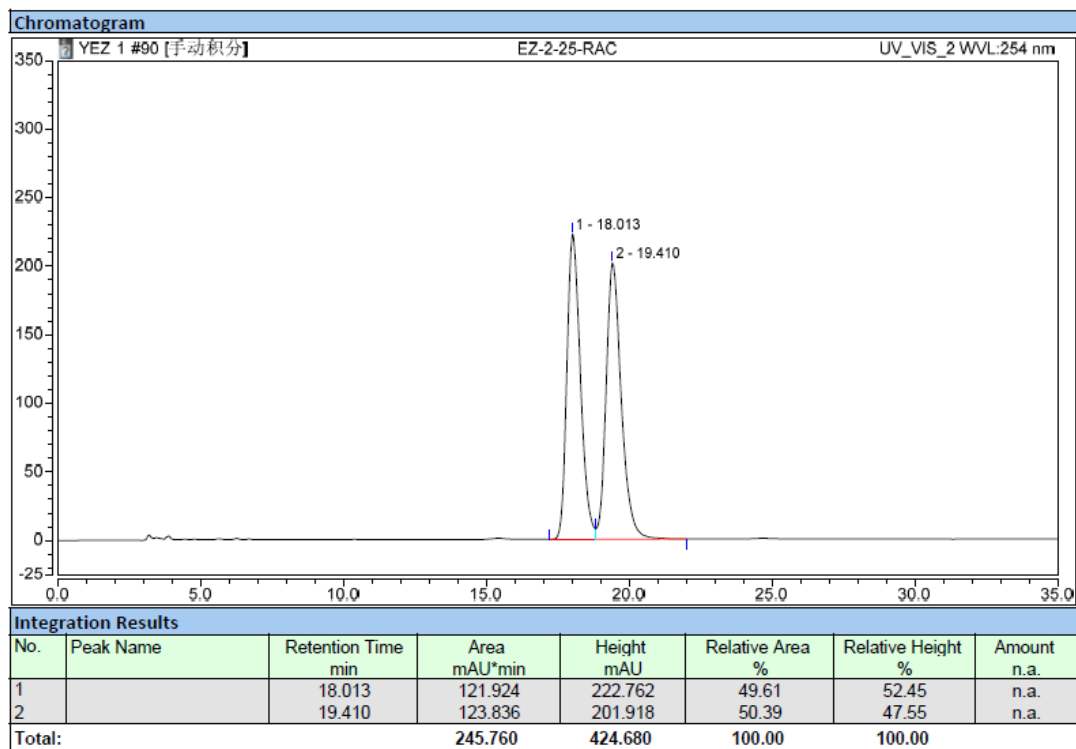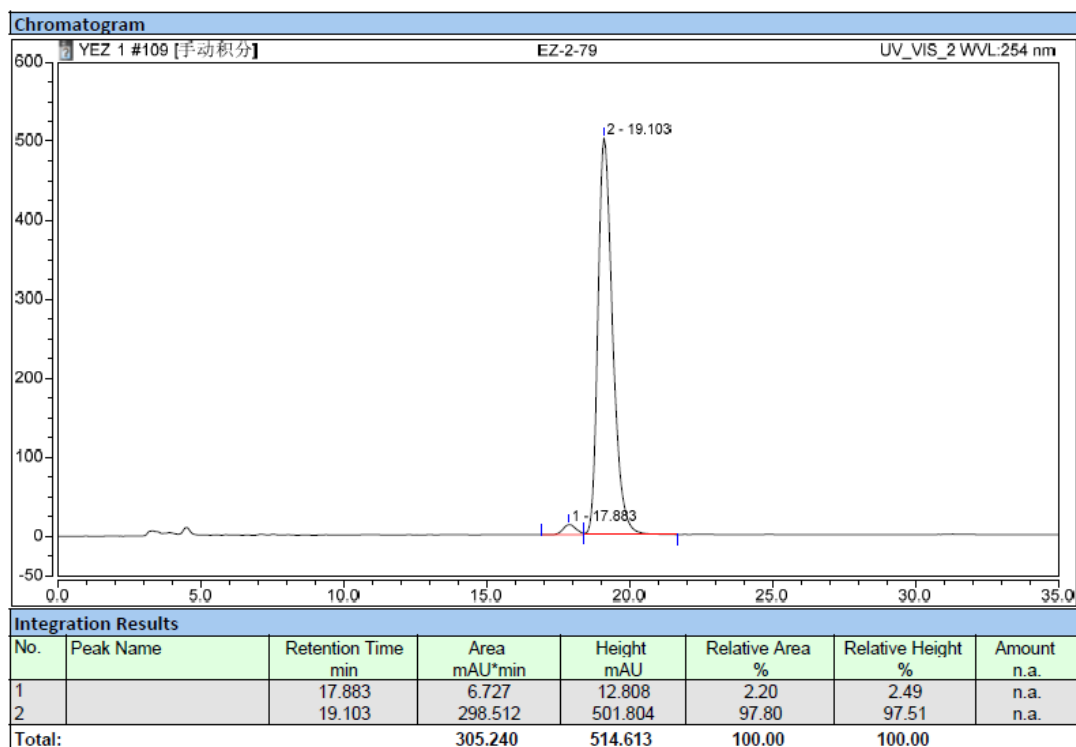

# Compound 3al

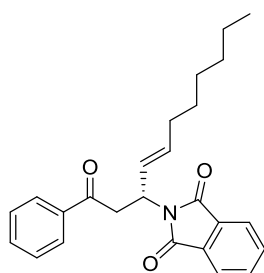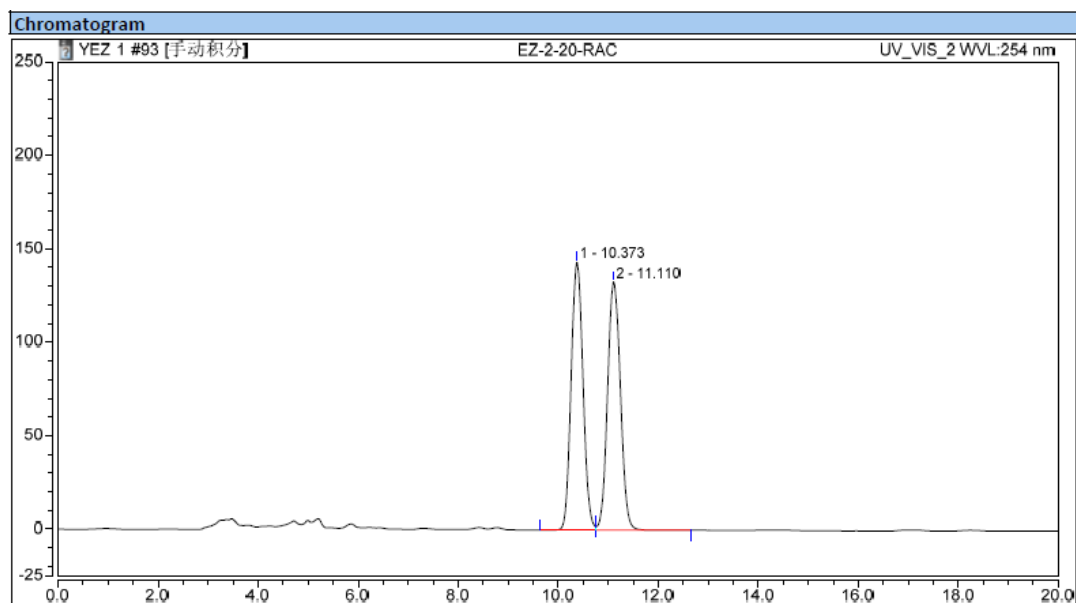

**Integration Results**

| No.           | Peak Name | Retention Time<br>min | Area<br>mAU*min | Height<br>mAU  | Relative Area<br>% | Relative Height<br>% | Amount<br>n.a. |
|---------------|-----------|-----------------------|-----------------|----------------|--------------------|----------------------|----------------|
| 1             |           | 10.373                | 39.350          | 143.165        | 49.90              | 51.88                | n.a.           |
| 2             |           | 11.110                | 39.513          | 132.807        | 50.10              | 48.12                | n.a.           |
| <b>Total:</b> |           |                       | <b>78.863</b>   | <b>275.972</b> | <b>100.00</b>      | <b>100.00</b>        |                |

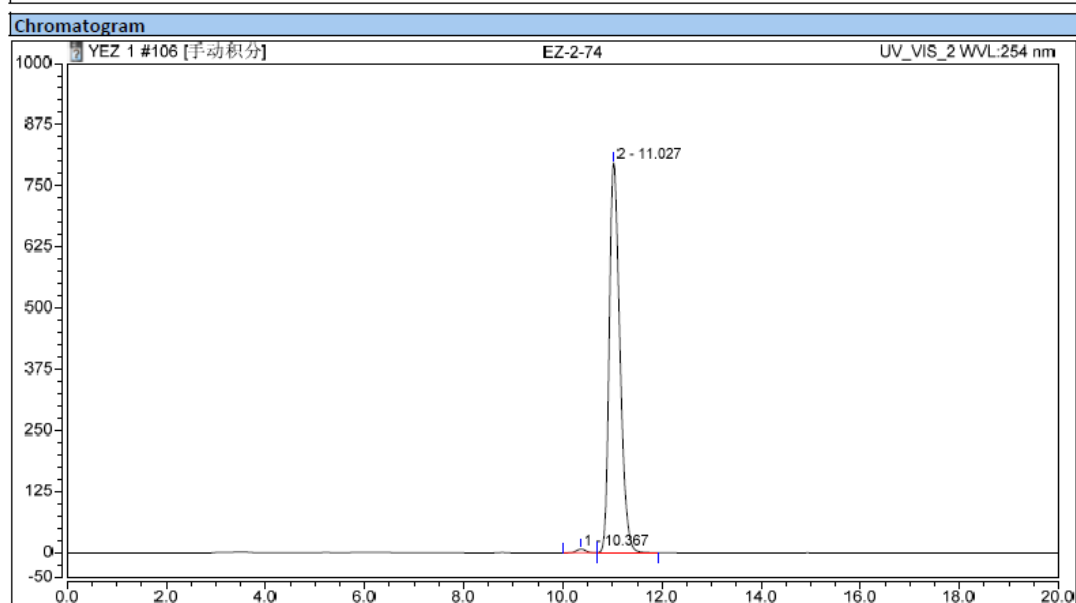

**Integration Results**

| No.           | Peak Name | Retention Time<br>min | Area<br>mAU*min | Height<br>mAU  | Relative Area<br>% | Relative Height<br>% | Amount<br>n.a. |
|---------------|-----------|-----------------------|-----------------|----------------|--------------------|----------------------|----------------|
| 1             |           | 10.367                | 1.606           | 7.519          | 0.80               | 0.93                 | n.a.           |
| 2             |           | 11.027                | 199.102         | 796.878        | 99.20              | 99.07                | n.a.           |
| <b>Total:</b> |           |                       | <b>200.708</b>  | <b>804.397</b> | <b>100.00</b>      | <b>100.00</b>        |                |

# Compound 3am

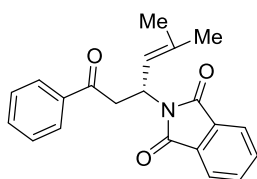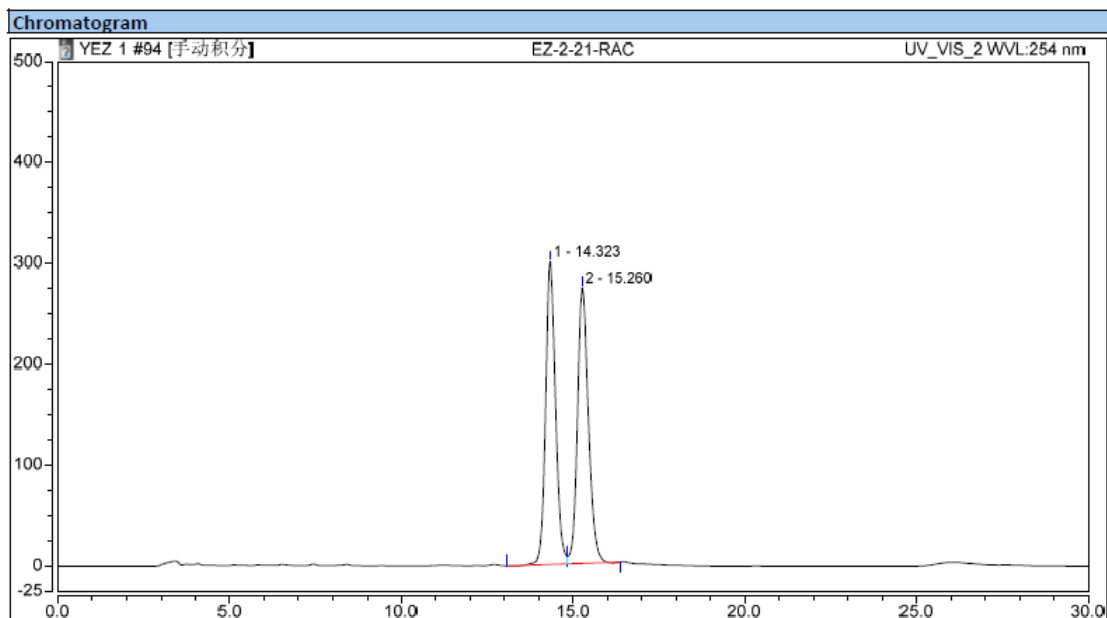

**Integration Results**

| No.           | Peak Name | Retention Time min | Area mAU*min   | Height mAU     | Relative Area % | Relative Height % | Amount n.a. |
|---------------|-----------|--------------------|----------------|----------------|-----------------|-------------------|-------------|
| 1             |           | 14.323             | 100.224        | 300.341        | 49.93           | 52.37             | n.a.        |
| 2             |           | 15.260             | 100.523        | 273.131        | 50.07           | 47.63             | n.a.        |
| <b>Total:</b> |           |                    | <b>200.747</b> | <b>573.472</b> | <b>100.00</b>   | <b>100.00</b>     |             |

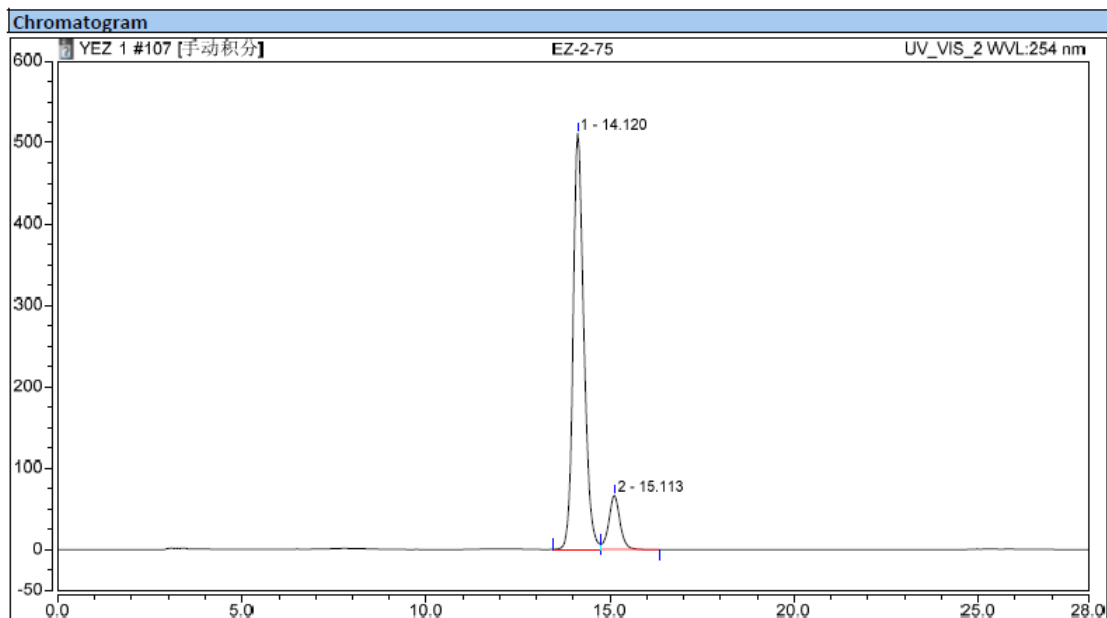

**Integration Results**

| No.           | Peak Name | Retention Time min | Area mAU*min   | Height mAU     | Relative Area % | Relative Height % | Amount n.a. |
|---------------|-----------|--------------------|----------------|----------------|-----------------|-------------------|-------------|
| 1             |           | 14.120             | 172.835        | 510.784        | 88.11           | 88.49             | n.a.        |
| 2             |           | 15.113             | 23.322         | 66.458         | 11.89           | 11.51             | n.a.        |
| <b>Total:</b> |           |                    | <b>196.157</b> | <b>577.242</b> | <b>100.00</b>   | <b>100.00</b>     |             |

### Compound 4+4' (9:1 dr)

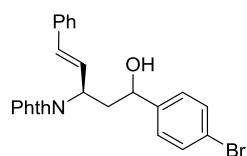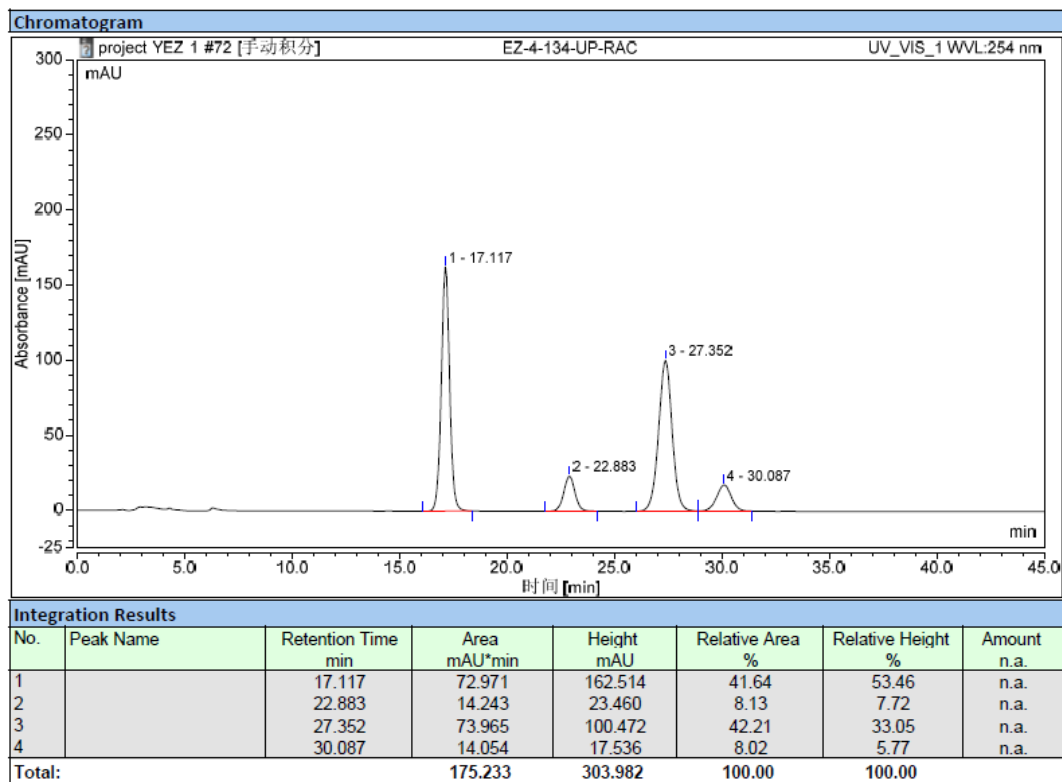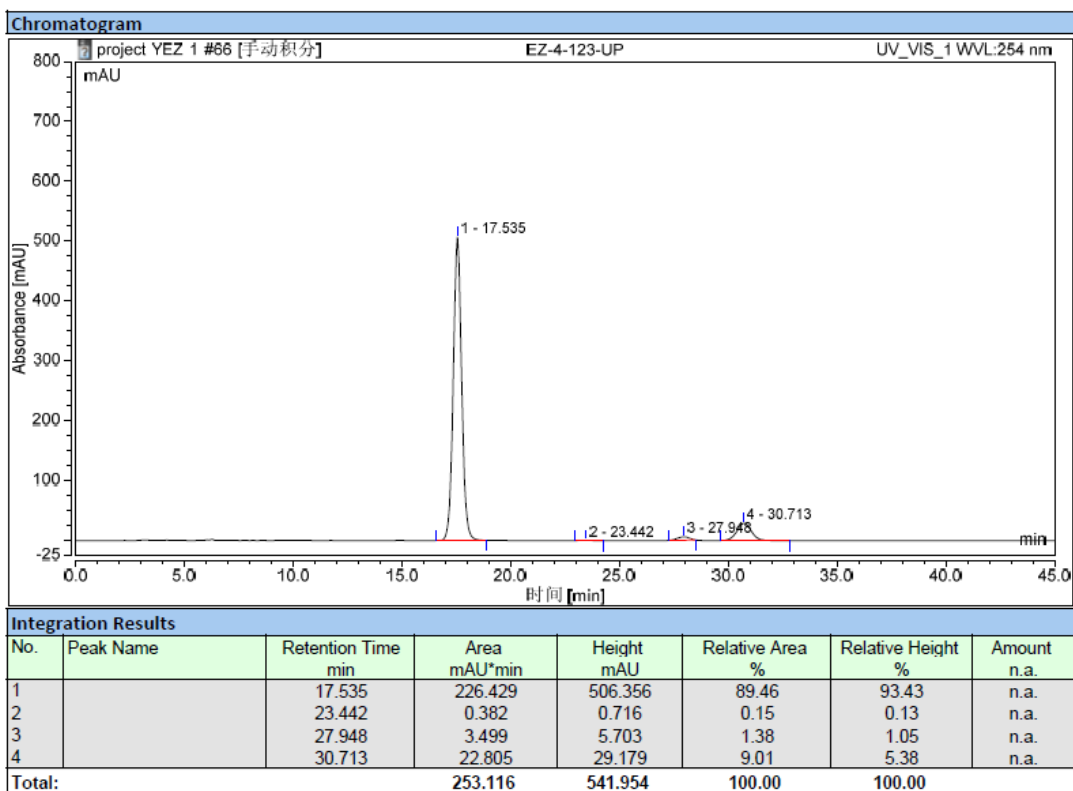

## Compound 4+4' (4:1 *dr*)

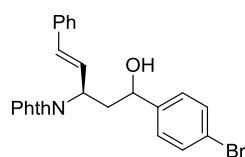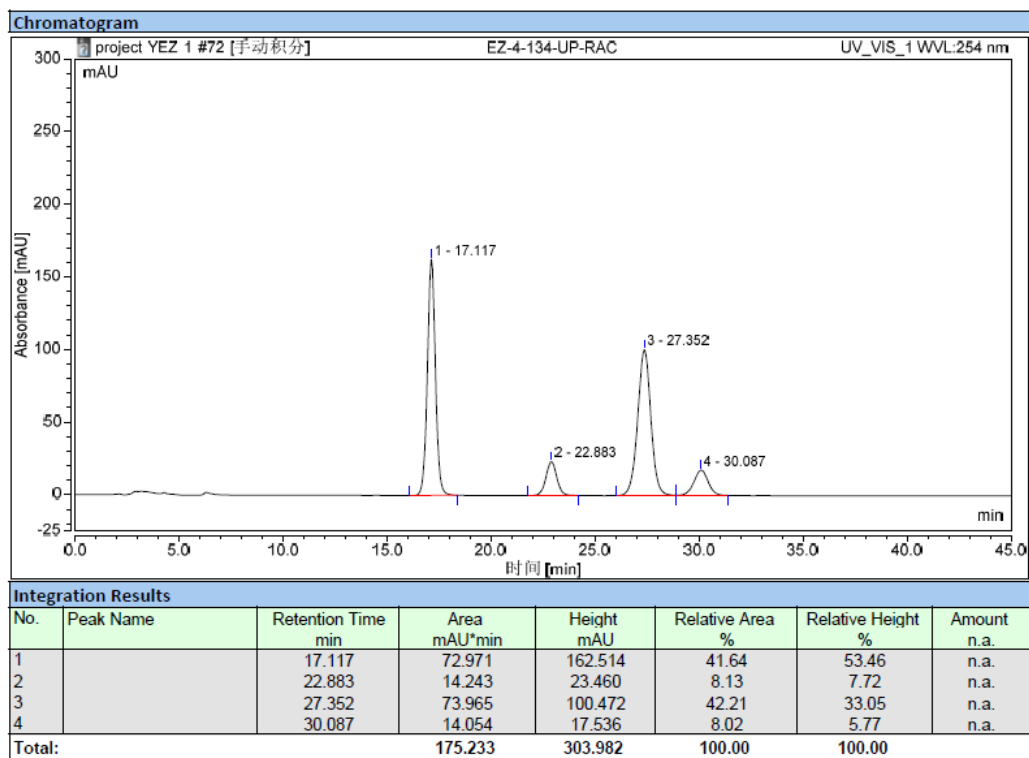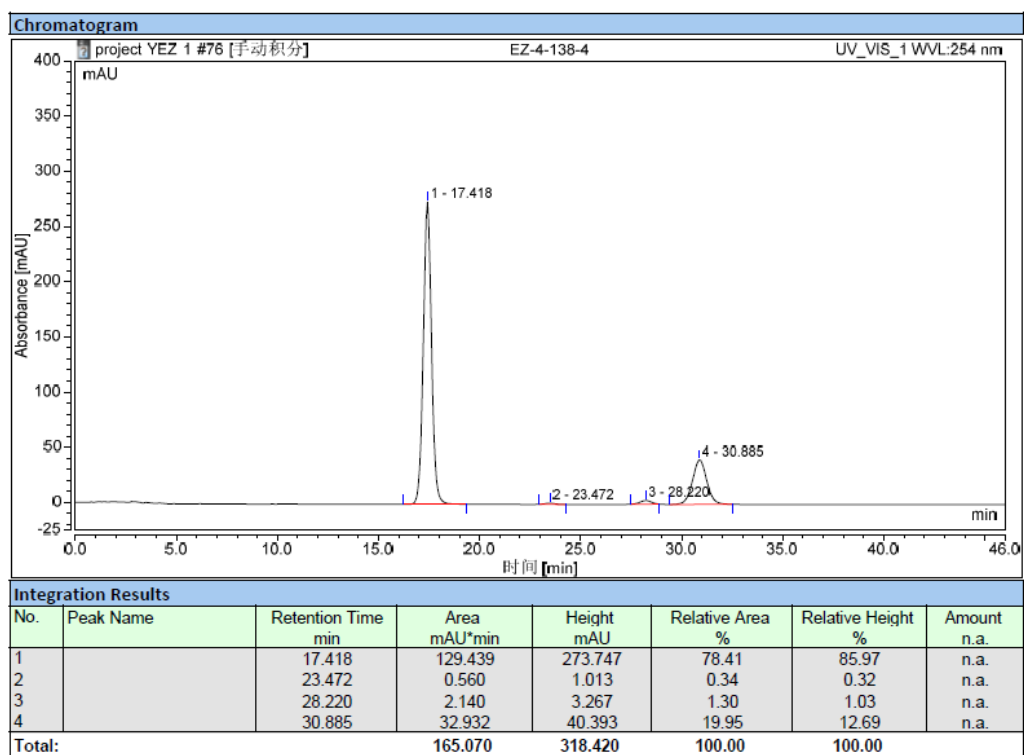

## Compound 6

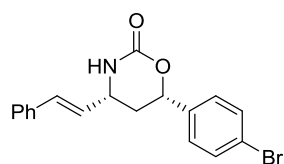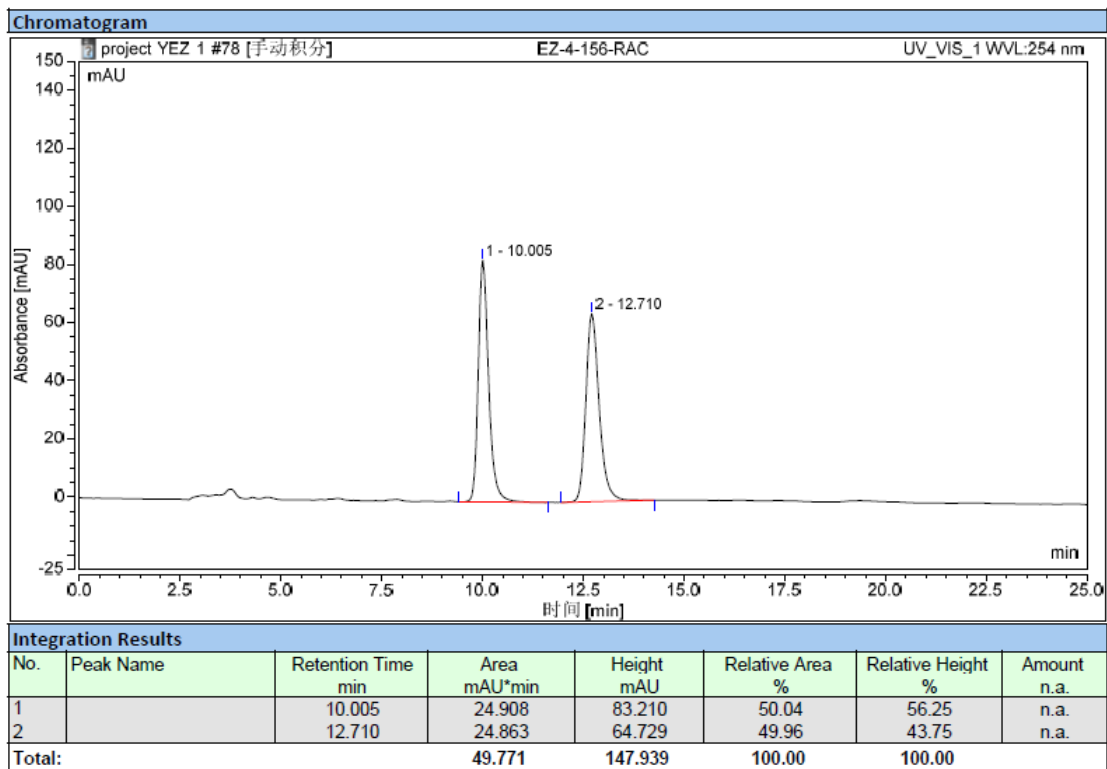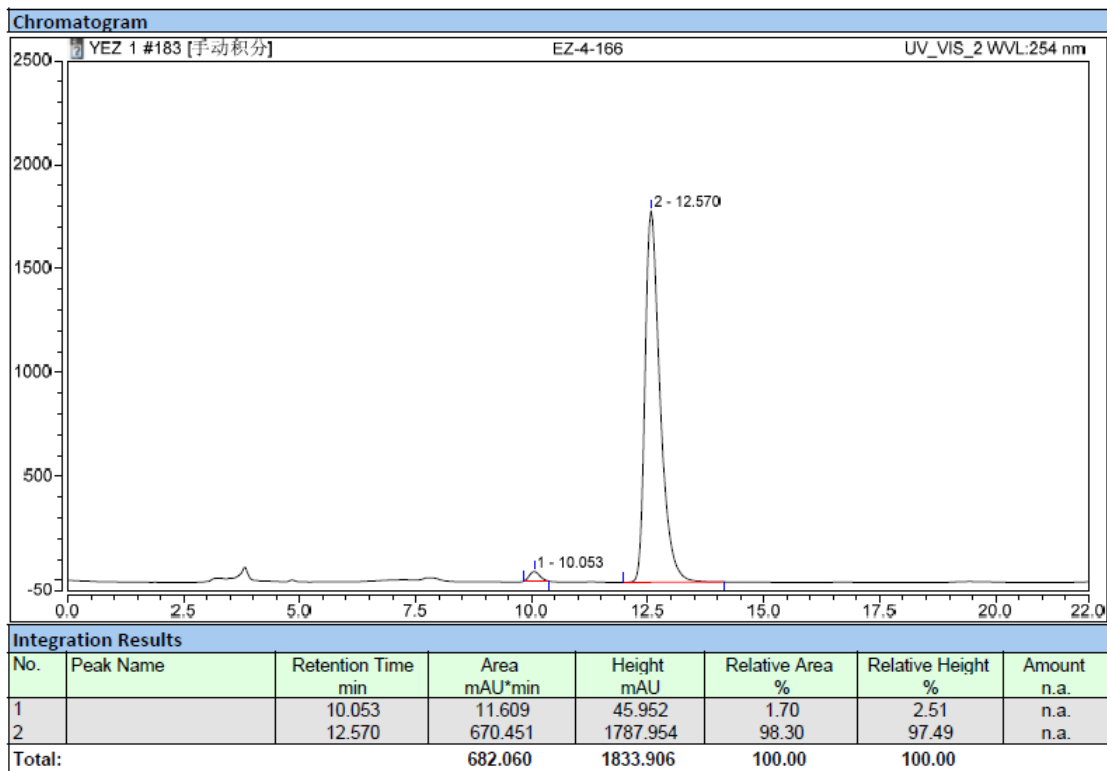

## Compound 7

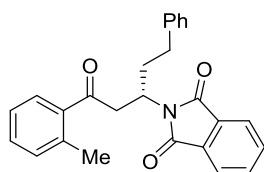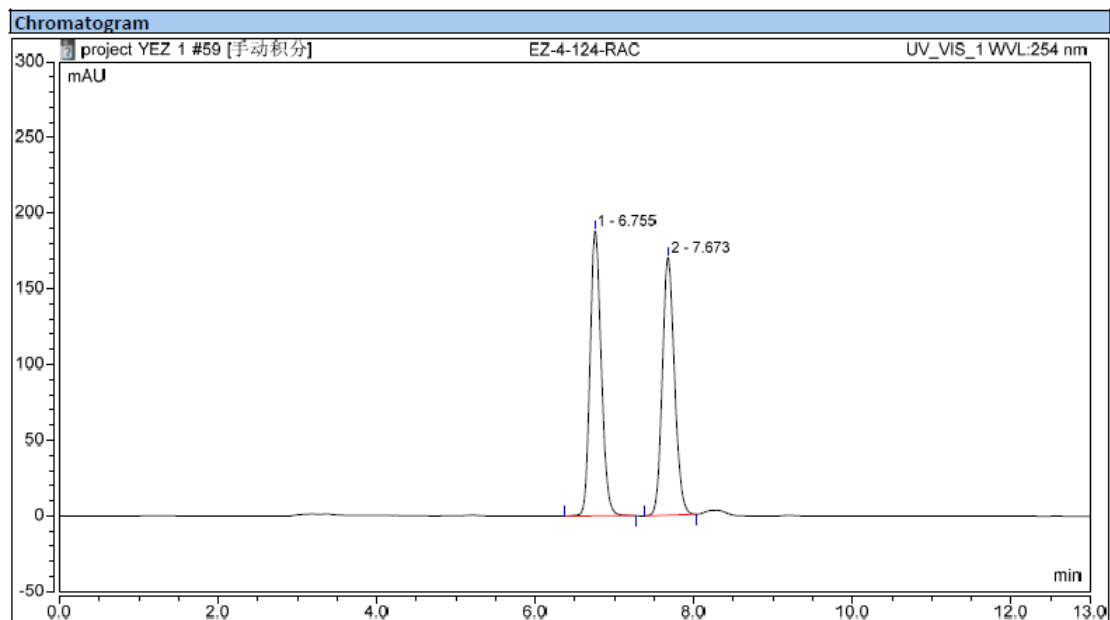

**Integration Results**

| No.           | Peak Name | Retention Time min | Area mAU*min  | Height mAU     | Relative Area % | Relative Height % | Amount |
|---------------|-----------|--------------------|---------------|----------------|-----------------|-------------------|--------|
| 1             |           | 6.755              | 30.825        | 188.464        | 50.39           | 52.53             | n.a.   |
| 2             |           | 7.673              | 30.343        | 170.308        | 49.61           | 47.47             | n.a.   |
| <b>Total:</b> |           |                    | <b>61.168</b> | <b>358.772</b> | <b>100.00</b>   | <b>100.00</b>     |        |

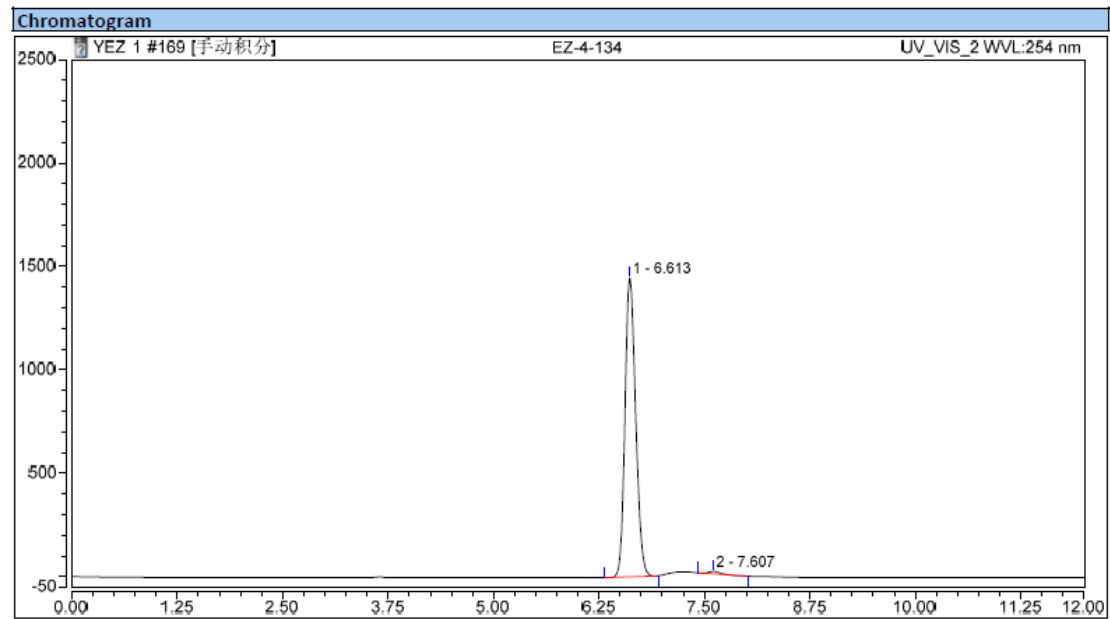

**Integration Results**

| No.           | Peak Name | Retention Time min | Area mAU*min   | Height mAU      | Relative Area % | Relative Height % | Amount |
|---------------|-----------|--------------------|----------------|-----------------|-----------------|-------------------|--------|
| 1             |           | 6.613              | 210.602        | 1444.155        | 99.23           | 99.17             | n.a.   |
| 2             |           | 7.607              | 1.627          | 12.057          | 0.77            | 0.83              | n.a.   |
| <b>Total:</b> |           |                    | <b>212.229</b> | <b>1456.213</b> | <b>100.00</b>   | <b>100.00</b>     |        |
